# Supplementary material
Source: Royal Society of Chemistry journal article supplement (doi:10.1039/d6fo00231e)
Supplement: d6fo00231e1.xlsx [file d6fo00231e1.xlsx]

## Sheet: Supernatant
Peptides identified in supernatant fraction
Row	Peptide	Length	m/z	Mass	z	Arthrospira platensis_1	Arthrospira platensis_2	Arthrospira platensis_3	Chlamydomonas sp._1	Chlamydomonas sp._2	Chlamydomonas sp._3	Desmodesmus arthrodesmiformis_1	Desmodesmus arthrodesmiformis_2	Desmodesmus arthrodesmiformis_3	Glaucocystis Nostochinearum_1	Glaucocystis Nostochinearum_2	Glaucocystis Nostochinearum_3	Nannochloropsis australis_1	Nannochloropsis australis_2	Nannochloropsis australis_3	Pandorina sp._1	Pandorina sp._2	Pandorina sp._3	Rhodomonas salina_1	Rhodomonas salina_2	Rhodomonas salina_3	Snowella sp._1	Snowella sp._2	Snowella sp._3
1	NL	2	246.145	245.138	1	14.8404	14.5869	14.7094	14.6677	14.4541	14.7652	14.769	14.716	14.602	15.021	15.0476	14.7617	14.809	14.6031	14.8173	14.7617	14.9517	NA	14.0286	15.1322	15.5226	14.8335	14.6367	14.7079
2	EL	2	261.144	260.137	1	NA	NA	NA	NA	NA	NA	NA	NA	NA	14.3639	NA	NA	NA	NA	NA	12.7741	NA	NA	14.4469	NA	13.0596	NA	NA	NA
3	QLL	3	373.245	372.237	1	15.2083	14.7353	14.5178	15.2146	NA	NA	NA	NA	NA	NA	14.6173	14.893	15.0999	14.8363	14.8266	NA	NA	NA	NA	15.7268	15.9356	NA	NA	15.0654
4	PGPV	4	369.214	368.206	1	11.8235	NA	11.5779	12.9745	12.9947	13.1801	13.2641	12.8161	NA	11.6213	12.1337	NA	12.4917	NA	NA	12.2781	12.5894	13.8133	13.3281	12.8204	13.068	13.2232	12.8102	12.561
5	APVP	4	383.229	382.222	1	16.7298	16.761	16.8891	NA	15.6819	15.7434	12.7103	NA	15.5404	16.9306	17.0779	17.0731	17.3059	17.1778	17.2627	17.2941	17.2926	17.2677	17.2419	16.966	17.2125	15.744	15.7357	NA
6	PAVP	4	383.229	382.222	1	16.7298	16.761	16.8891	13.1625	15.6819	15.7434	15.8862	15.6818	NA	12.4088	16.9662	17.0731	17.3059	17.1778	17.2627	17.2941	17.2926	17.2677	17.2419	16.966	17.2125	15.744	15.7357	12.7675
7	MAAP	4	389.182	388.178	1	17.4528	17.34	17.4168	16.8348	16.7447	16.7503	16.6985	16.8608	16.3571	17.4907	17.5674	17.4362	17.2568	17.3245	17.3146	17.2763	16.9087	17.0838	16.7541	16.6158	16.9638	16.9	16.8291	NA
8	AVLP	4	399.261	398.253	1	13.1485	12.8766	12.9041	NA	14.1972	14.1939	NA	12.9868	13.2228	13.1831	13.213	13.2064	NA	13.2404	13.1945	13.0185	NA	13.0762	13.8901	13.7788	14.2993	13.1245	13.0467	NA
9	ALLP	4	413.276	412.269	1	NA	NA	14.5065	NA	NA	15.6992	15.9319	15.5528	14.9916	14.9665	14.7838	NA	NA	NA	NA	NA	NA	NA	12.3607	13.829	NA	NA	16.1919	NA
10	PGFP	4	417.214	416.206	1	15.3579	15.4147	15.3238	NA	14.8955	14.6641	15.2861	15.1624	14.6875	15.2243	15.2988	15.4129	15.0696	NA	15.0778	15.2086	15.3429	15.2945	15.4103	15.2761	NA	15.013	14.9468	15.0018
11	LPVP	4	425.276	424.269	1	16.6049	16.4642	16.5303	16.0281	15.8561	15.9855	16.4123	16.2608	16.5352	17.1566	17.0779	17.1826	17.0033	16.9426	17.0726	16.5786	16.2767	16.2656	15.6784	15.0385	16.7554	16.0772	16.1203	NA
12	PTLP	4	427.255	426.248	1	13.0372	13.0072	13.1214	NA	NA	NA	NA	NA	NA	13.1641	13.6153	13.7304	13.5994	13.9215	13.7672	14.019	13.2496	13.2827	13.4236	NA	13.6015	NA	NA	NA
13	LSLP	4	429.27	428.264	1	12.6243	12.3664	12.0885	13.2387	12.6846	12.9434	NA	13.103	NA	12.2388	NA	12.0075	12.1365	12.9836	12.8555	12.4739	12.62	12.2804	11.4037	12.1208	11.9165	13.4748	12.9772	NA
14	AEDP	4	431.178	430.17	1	NA	15.7931	NA	NA	NA	NA	15.1554	15.0954	NA	NA	NA	NA	NA	NA	16.0652	15.932	NA	NA	14.934	14.7393	15.0852	NA	NA	NA
15	TSLL	4	433.266	432.258	1	12.9957	NA	10.7811	12.4174	11.9907	12.8825	NA	12.8541	13.0818	NA	NA	NA	NA	11.1981	NA	NA	11.6668	11.1746	12.5124	12.2829	12.8099	NA	NA	NA
16	ALVF	4	449.276	448.269	1	14.5059	14.6096	14.8472	14.0628	14.1338	14.0615	14.1269	13.8302	13.3453	NA	14.2162	14.306	14.209	14.4927	14.1659	14.2834	14.8614	14.6549	15.6261	15.2648	15.7054	14.0284	13.8532	11.49
17	PPYP	4	473.24	472.232	1	NA	NA	NA	NA	NA	NA	NA	NA	NA	NA	NA	NA	15.0245	15.173400000000001	15.3458	NA	NA	NA	15.0548	NA	14.96	NA	NA	NA
18	VTEF	4	495.245	494.238	1	14.6323	14.2076	13.762	15.4812	15.3883	15.4668	15.4929	15.6755	15.0385	13.9908	13.6368	14.3435	15.108	14.7906	14.1883	14.5747	14.4048	NA	15.1399	15.2296	15.3995	15.1772	15.286	14.8721
19	LVNY	4	508.277	507.269	1	NA	NA	NA	NA	NA	NA	10.2645	NA	10.5327	NA	NA	NA	NA	NA	NA	NA	NA	NA	NA	NA	10.3586	NA	NA	NA
20	LQVR	4	258.169	514.323	2	12.3175	12.0813	11.073	12.9749	12.6915	13.1469	13.17	13.3311	13.6742	12.8091	12.4548	12.8034	12.7147	11.3629	12.5241	NA	NA	11.0764	NA	NA	11.593	12.5873	12.1369	12.0646
21	FEWR	4	319.159	636.302	2	14.0397	13.1934	13.1355	14.7711	NA	15.061	12.6896	NA	NA	13.3617	13.1485	13.7082	NA	13.0127	13.3752	12.6063	13.8312	13.4069	14.4556	14.1462	14.7969	NA	NA	NA
22	SGGPV	5	416.215	415.207	1	15.407	15.2126	NA	NA	NA	NA	NA	NA	NA	15.3492	NA	15.4052	NA	15.1828	15.1778	NA	NA	NA	14.8899	NA	NA	NA	15.4751	NA
23	LGPPN	5	497.272	496.264	1	14.4465	14.0798	14.1915	14.7204	13.9262	14.6941	14.7262	15.3057	14.2761	14.8095	15.0301	14.7248	14.5961	14.7114	14.5887	14.3409	NA	NA	NA	NA	14.4625	14.8317	14.2348	14.5138
24	PVLPV	5	524.345	523.337	1	NA	NA	NA	NA	13.8728	13.9349	NA	NA	NA	NA	NA	NA	NA	NA	NA	12.54	NA	NA	13.7839	NA	13.6864	14.7236	14.7632	NA
25	QPPTP	5	539.284	538.275	1	12.4278	NA	NA	NA	NA	NA	NA	NA	NA	NA	12.8456	NA	12.4373	NA	NA	NA	NA	12.1628	12.1365	NA	12.685	NA	NA	NA
26	LAVFL	5	562.361	561.353	1	12.3198	12.2177	12.0568	12.5964	12.1348	12.6395	12.0693	12.2688	12.2791	11.8098	11.9986	12.0174	12.3396	12.1262	11.8684	11.2828	12.8805	12.4728	14.1026	14.0992	14.1989	11.7651	11.6382	11.3226
27	ALVFL	5	562.361	561.353	1	12.3198	12.2177	12.0568	12.5964	NA	NA	12.0693	NA	12.2791	11.8098	NA	NA	NA	NA	NA	NA	12.8805	NA	NA	14.0992	14.1989	11.7651	NA	NA
28	YLGPK	5	577.336	576.327	1	NA	NA	NA	11.6349	11.2037	11.5916	11.5948	11.6915	11.5651	NA	NA	10.8658	NA	NA	NA	NA	NA	NA	11.3309	11.3652	11.7559	11.413	11.5068	11.7508
29	LALPW	5	599.356	598.348	1	13.6758	13.5955	13.6666	NA	NA	13.2121	NA	13.7329	12.4936	13.8679	13.7956	13.7532	13.5994	14.0592	13.534	13.1516	12.84	12.7561	12.7281	NA	13.0238	12.9696	13.8258	13.8067
30	DFFPN	5	639.278	638.27	1	14.2432	14.4191	14.3728	13.816	13.645	13.6689	13.5186	13.7063	13.0105	14.3319	14.444	NA	14.3977	14.2841	14.2176	14.204	14.2454	14.2563	NA	14.1608	14.3961	13.5542	13.6299	13.3107
31	VGLPR	5	271.177	540.338	2	NA	NA	NA	NA	NA	NA	NA	NA	NA	NA	12.9223	12.9716	NA	NA	NA	NA	NA	NA	NA	NA	13.0003	NA	NA	NA
32	DSAEDL	6	649.269	648.26	1	13.3428	NA	13.2221	NA	12.8947	NA	NA	NA	NA	NA	13.6048	13.6911	13.3687	13.4757	13.1426	13.0559	12.4833	NA	NA	NA	NA	NA	NA	12.6318
33	LGTVVR	6	322.709	643.402	2	13.4464	12.7081	12.2505	13.3162	12.9369	13.5134	13.5437	13.4523	13.7736	13.2681	13.0069	13.4472	13.1291	12.5314	13.0854	12.3731	13.4946	13.3501	14.7353	13.7817	NA		12.2018	12.2346
34	NMVWFR	6	434.711	867.406	2	NA	NA	12.8816	14.8757	14.6619	15.7428	14.6836	NA	NA	14.7794	13.1653	NA	14.0415	NA	NA	13.6289	NA	NA	NA	NA	15.0618	15.3301	14.1471	14.2349
35	NFVEGFR	7	434.711	867.424	2	NA	NA	14.0026	14.6579	14.6619	NA	14.5934	NA	NA	NA	NA	NA	NA	NA	NA	13.6289	NA	NA	NA	NA	NA	NA	NA	NA

## Sheet: 3–10 kDa
Peptides identified in 3–10 kDa fraction
Row	Peptide	Length	m/z	z	Arthrospira platensis_1	Arthrospira platensis_2	Arthrospira platensis_3	Chlamydomonas sp._1	Chlamydomonas sp._2	Chlamydomonas sp._3	Desmodesmus arthrodesmiformis_1	Desmodesmus arthrodesmiformis_2	Desmodesmus arthrodesmiformis_3	Glaucocystis Nostochinearum_1	Glaucocystis Nostochinearum_2	Glaucocystis Nostochinearum_3	Nannochloropsis australis_1	Nannochloropsis australis_2	Nannochloropsis australis_3	Pandorina sp._1	Pandorina sp._2	Pandorina sp._3	Rhodomonas salina_1	Rhodomonas salina_2	Rhodomonas salina_3	Snowella sp._1	Snowella sp._2	Snowella sp._3
1	LVGA	4	359.229	1	11.3887	11.8773	10.5139	10.6627	10.6825	10.8985	NaN	9.77297	10.5582	10.4246	NaN	9.79217	11.6543	12.102	12.4247	11.4152	12.1189	11.714	11.6336	12.6038	12.428	9.77491	10.4559	10.5665
2	ALGT	4	361.208	1	9.96357	10.1059	9.47067	10.6255	10.5869	10.3935	NaN	10.0435	10.7973	11.2145	10.3882	10.8887	NaN	9.96269	NaN	11.4785	11.2824	11.6255	11.9362	11.2621	11.1499	10.257	10.0041	9.83533
3	AGTL	4	361.209	1	10.0418	NaN	8.5682	9.06455	9.23695	NaN	NaN	NaN	8.9664	8.46665	8.86181	NaN	9.34359	9.80228	10.2365	NaN	NaN	NaN	NaN	9.39375	NaN	NaN	8.0705	NaN
4	SGLS	4	363.189	1	9.20603	9.25843	8.79886	7.83038	8.43845	8.37878	NaN	7.58405	8.60118	7.84094	NaN	NaN	9.1105	NaN	9.20375	9.06283	9.44672	8.45207	NaN	9.17783	NaN	8.17144	7.61821	7.36689
5	AVAL	4	373.245	1	NaN	NaN	NaN	NaN	NaN	10.8459	NaN	NaN	NaN	NaN	NaN	NaN	NaN	NaN	NaN	NaN	10.0738	7.77894	NaN	NaN	NaN	NaN	9.20508	NaN
6	GLAL	4	373.245	1	NaN	NaN	NaN	NaN	NaN	NaN	NaN	NaN	NaN	NaN	NaN	NaN	NaN	NaN	NaN	NaN	NaN	NaN	NaN	NaN	NaN	9.02763	9.20508	NaN
7	GTVV	4	375.224	1	11.7472	12.1069	12.0165	10.6817	10.8128	NaN	NaN	9.8518	10.0706	NaN	NaN	NaN	11.5116	12.4792	11.5261	8.85669	9.67406	NaN	11.586	12.1067	NaN	NaN	10.0134	9.76319
8	SGLV	4	375.225	1	10.4911	9.63747	10.1762	10.045	10.1875	10.1006	NaN	NaN	10.6104	NaN	10.2652	10.0193	NaN	10.6516	NaN	NaN	10.2609	10.4744	10.5003	10.3694	NaN	10.5459	9.91022	NaN
9	FGGV	4	379.198	1	NaN	NaN	7.21077	NaN	NaN	NaN	NaN	NaN	NaN	NaN	8.22905	7.5744	NaN	NaN	NaN	NaN	NaN	NaN	7.81548	NaN	NaN	8.72219	7.70349	NaN
10	PAVP	4	383.229	1	NaN	NaN	NaN	NaN	NaN	NaN	NaN	NaN	NaN	10.7996	NaN	NaN	NaN	10.0126	NaN	NaN	NaN	NaN	10.9715	NaN	10.6494	NaN	11.0344	NaN
11	VGLP	4	385.244	1	10.6865	10.2747	10.1876	8.021	NaN	NaN	NaN	7.36784	10.9658	NaN	NaN	12.2393	8.45801	10.4314	9.60079	9.17266	9.42891	9.16205	NaN	NaN	9.89675	NaN	7.80269	7.31269
12	LGTP	4	387.225	1	NaN	NaN	NaN	9.75285	NaN	10.0676	NaN	NaN	9.41455	NaN	NaN	NaN	NaN	9.53721	NaN	NaN	NaN	NaN	8.72021	NaN	NaN	8.22753	9.57595	NaN
13	ALSP	4	387.224	1	10.5861	10.5415	10.1144	11.1449	11.3261	NaN	NaN	10.0917	11.2228	9.62104	NaN	NaN	NaN	NaN	10.4143	10.5298	10.7524	10.6884	10.4672	NaN	NaN	10.7515	10.6948	NaN
14	VGLV	4	387.261	1	14.1891	14.42	14.0268	14.1667	14.2576	14.3042	9.00578	13.3796	13.7526	13.1872	12.9597	13.0987	13.2114	14.0289	13.6894	13.7829	13.685	13.949	14.3732	14.239	13.7761	13.9161	13.7335	13.5211
15	VVLG	4	387.261	1	11.8523	12.6594	11.3501	13.2808	13.2355	13.5824	7.85036	13.3152	12.7709	12.992	10.8663	11.7585	13.0331	NaN	13.4576	12.2844	12.6087	12.2196	12.8185	13.0017	12.9474	12.3834	12.6095	12.6499
16	NGVV	4	388.22	1	NaN	NaN	NaN	NaN	NaN	NaN	NaN	NaN	NaN	NaN	NaN	NaN	NaN	NaN	NaN	NaN	NaN	NaN	NaN	NaN	NaN	9.01184	8.12492	NaN
17	ALGK	4	388.256	1	10.4817	NaN	9.04442	10.0068	10.3026	13.0966	7.33485	12.9617	NaN	12.6759	NaN	NaN	13.5324	NaN	11.1713	9.87214	12.4491	12.958	NaN	NaN	NaN	NaN	9.58239	12.862
18	MAAP	4	389.184	1	NaN	NaN	15.3464	NaN	NaN	14.3574	NaN	NaN	14.4726	NaN	16.5268	NaN	12.3925	15.3693	13.3124	NaN	NaN	NaN	15.6961	15.4857	NaN	15.4756	14.4357	NaN
19	ALAD	4	389.204	1	11.5122	11.5385	10.6455	11.0797	11.0539	10.7533	NaN	11.2921	10.8788	12.1491	10.7008	11.9176	11.2659	10.7797	10.7569	11.6068	10.4723	10.8135	11.8578	12.0447	11.7188	10.2061	10.3629	10.4006
20	LGTV	4	389.24	1	15.9213	16.4816	15.4276	17.4179	17.4723	17.3832	12.1531	17.0522	16.8006	15.0759	NaN	NaN	16.2042	16.2523	16.4807	15.248	15.6694	15.5774	16.0759	16.6462	16.4031	15.7448	16.5784	16.4925
21	MAVG	4	393.184	1	NaN	NaN	NaN	11.1685	11.1089	8.31617	NaN	10.8031	7.62238	9.85196	NaN	8.3098	NaN	NaN	NaN	9.68892	8.74544	NaN	NaN	NaN	NaN	10.4116	10.4708	7.57203
22	FGGGG	5	394.173	1	13.5711	13.747	13.0075	13.0814	11.997	12.0682	8.13589	11.1828	14.1442	12.022	12.7084	13.3166	12.8321	13.7109	13.4571	11.103	11.0129	10.0881	13.8467	14.0497	14.1293	13.6166	11.2727	10.2198
23	LGLP	4	399.261	1	NaN	NaN	NaN	9.16962	9.16101	9.33909	NaN	6.88154	NaN	NaN	9.22548	NaN	NaN	8.07647	NaN	9.08695	NaN	NaN	NaN	NaN	NaN	NaN	9.07979	9.0603
24	LGPL	4	399.261	1	NaN	NaN	NaN	8.86762	9.16101	9.33909	NaN	NaN	NaN	7.70579	NaN	8.09905	NaN	NaN	NaN	7.69461	7.66767	NaN	7.78578	NaN	NaN	9.17097	9.07979	NaN
25	KPGV	4	400.256	1	13.2064	13.0427	12.618	12.1824	12.1356	12.1498	NaN	11.3913	12.3253	12.945	13.1866	12.8924	13.1074	13.189	12.9801	12.3906	12.331	12.4071	13.2917	13.5307	12.8428	12.5955	11.6619	11.3663
26	TLAP	4	401.239	1	10.1239	10.7108	9.92087	NaN	NaN	NaN	NaN	NaN	NaN	NaN	NaN	NaN	NaN	NaN	NaN	NaN	NaN	NaN	NaN	NaN	NaN	NaN	NaN	NaN
27	LVGL	4	401.277	1	9.68196	10.1797	9.58651	10.9958	10.9994	11.1532	NaN	10.543	10.6375	9.39637	NaN	9.13002	10.3029	NaN	10.5269	9.7692	NaN	9.98049	11.0873	NaN	10.753	10.2556	10.4463	10.2905
28	LGLV	4	401.276	1	11.4618	11.5612	11.3277	10.8547	10.8938	11.012	NaN	9.75829	10.5984	9.54129	9.88132	9.86843	10.1363	11.7268	10.9381	10.5622	10.7361	10.6467	11.4823	11.3041	10.9447	10.6378	10.3538	10.0132
29	VLAV	4	401.276	1	12.3027	12.6778	11.6474	11.468	11.1101	11.0046	NaN	NaN	11.1911	11.0119	10.6333	11.4508	NaN	12.7295	13.089	11.0479	11.1946	10.5932	12.2508	12.8355	12.5299	10.8545	10.0714	NaN
30	DLGV	4	403.22	1	13.5349	13.0809	13.2498	NaN	13.7049	13.463	8.70412	12.5985	13.8313	NaN	12.9869	13.168	NaN	14.1738	12.5877	12.3139	12.567	12.4412	13.3952	13.7	12.646	14.1135	13.0957	12.9743
31	QLGS	4	404.215	1	10.8495	NaN	NaN	NaN	11.6388	11.6133	NaN	10.3234	11.4059	11.1049	10.3488	10.8814	10.0957	10.5285	NaN	12.4672	12.1234	12.595	11.6446	NaN	11.2506	10.7345	11.0242	10.8152
32	LSGGA	5	404.215	1	NaN	11.9977	NaN	12.9138	NaN	NaN	7.27817	NaN	12.7938	10.7977	NaN	11.102	NaN	NaN	12.095	NaN	NaN	11.7292	11.8166	11.8398	12.2935	11.8144	12.0721	11.6497
33	LDAS	4	405.198	1	9.85151	9.75646	9.37365	9.39009	NaN	9.85989	NaN	NaN	10.7244	NaN	NaN	NaN	NaN	9.4081	9.8001	NaN	NaN	NaN	NaN	9.52609	9.70231	10.665	NaN	NaN
34	SSLV	4	405.234	1	9.97959	9.59048	9.92461	8.83302	9.07818	9.29204	NaN	7.30752	8.98236	NaN	7.70909	NaN	7.98112	9.83172	8.57592	8.29475	9.5295	8.97719	9.4502	9.73635	9.22722	8.58684	8.27654	8.16987
35	VTVS	4	405.235	1	11.8689	11.5355	11.7425	11.4269	11.1252	11.1988	6.28603	9.93608	11.3988	9.42122	9.04046	9.74866	NaN	11.9801	NaN	11.0846	11.2874	11.3884	10.3912	11.0528	10.6448	11.0758	10.8762	10.615
36	SGWG	4	406.173	1	12.5472	12.6428	12.2948	13.3962	13.6512	13.7409	NaN	12.3614	13.3934	12.9809	13.7407	13.4916	10.7347	12.1106	11.8249	13.4713	13.2551	13.6796	13.4851	12.8398	12.5439	13.7288	13.282	12.9576
37	SSLT	4	407.214	1	9.74796	NaN	9.77592	10.7996	10.8927	11.1068	NaN	10.1333	10.748	9.48182	8.05816	8.34683	9.16725	NaN	10.5021	9.77599	9.52337	10.2895	10.8451	NaN	10.9366	10.0486	10.176	9.93495
38	STLS	4	407.214	1	8.74961	9.00372	NaN	NaN	8.90311	9.23838	NaN	NaN	8.72124	NaN	8.02476	7.87959	NaN	NaN	NaN	7.92351	NaN	8.45691	8.78192	9.20555	8.47616	8.86608	8.52038	8.29506
39	AFAV	4	407.23	1	NaN	NaN	NaN	NaN	NaN	NaN	NaN	NaN	7.59653	NaN	NaN	NaN	NaN	7.89837	8.56563	NaN	NaN	NaN	NaN	NaN	7.57325	NaN	NaN	NaN
40	LAFG	4	407.228	1	NaN	NaN	NaN	9.8881	9.83295	9.3356	NaN	8.70326	9.30331	NaN	NaN	NaN	NaN	NaN	8.00935	NaN	NaN	8.22427	NaN	NaN	8.02356	NaN	NaN	9.22742
41	ALPL	4	413.276	1	16.5352	16.9552	16.1278	16.8922	16.97	17.0575	11.8043	16.1233	16.7048	16.2752	15.9328	16.393	15.8663	16.9344	16.4926	16.5757	16.6351	16.7665	17.1623	17.4265	17.1416	16.4982	16.4578	16.2566
42	LLAP	4	413.277	1	14.8546	NaN	14.4979	14.8314	NaN	13.4432	9.95691	NaN	15.8251	13.5757	14.7659	15.7076	14.192	NaN	15.432	13.7485	13.8038	13.187	16.8726	16.215	16.5849	15.3184	12.981	NaN
43	ALLP	4	413.276	1	16.5352	16.9552	16.1278	16.8922	16.97	17.0575	NaN	16.1233	NaN	16.2752	15.9328	16.393	15.8663	16.9344	16.4926	16.5757	16.6351	16.7665	17.1623	NaN	17.1416	16.4982	16.4578	16.2566
44	LLPA	4	413.277	1	14.8546	15.0351	14.4979	14.8314	13.7349	13.4432	9.95691	12.4158	15.8251	13.5757	14.7659	15.7076	14.192	16.089	15.432	13.7485	13.8038	13.187	16.8726	16.215	16.5849	15.3184	12.981	11.9745
45	KAPV	4	414.272	1	9.95504	NaN	9.53725	NaN	9.08402	9.05412	NaN	7.43495	9.00305	8.36333	9.72797	9.09507	NaN	9.10881	NaN	9.98671	10.0011	10.5752	8.57841	8.51674	NaN	8.98863	8.58387	NaN
46	LGPK	4	414.271	1	13.3308	12.8393	12.8667	11.0679	15.3164	11.0082	10.2172	15.1196	11.5157	14.9712	11.9519	11.3814	11.655	13.425	14.6715	14.6912	10.676	14.7112	12.3311	12.9468	11.9234	12.2907	15.1668	15.0273
47	KLGP	4	414.272	1	NaN	NaN	12.0508	NaN	NaN	NaN	NaN	NaN	NaN	13.2202	NaN	12.8804	13.1518	NaN	NaN	NaN	11.4259	NaN	12.2453	12.2609	11.323	NaN	11.9879	NaN
48	GPLE	4	415.22	1	NaN	NaN	NaN	NaN	NaN	NaN	NaN	NaN	NaN	NaN	NaN	NaN	NaN	NaN	NaN	NaN	NaN	NaN	NaN	NaN	NaN	NaN	7.98877	7.9914
49	LSPV	4	415.256	1	13.4051	14.0488	12.7772	NaN	12.5285	13.0009	7.26003	11.8343	11.8646	11.8021	NaN	10.9778	14.4141	13.7981	14.5712	12.2188	12.9133	11.7185	12.7844	13.9476	13.6334	11.4809	12.0313	12.0793
50	LVLA	4	415.292	1	NaN	NaN	NaN	NaN	NaN	NaN	NaN	NaN	NaN	NaN	NaN	NaN	NaN	NaN	NaN	NaN	NaN	NaN	NaN	NaN	NaN	8.72762	8.22562	NaN
51	NSVP	4	416.214	1	NaN	NaN	14.0484	14.6582	NaN	14.7839	NaN	13.6009	NaN	13.8462	NaN	NaN	NaN	15.0362	NaN	NaN	NaN	NaN	NaN	14.3127	14.3151	15.0058	14.3185	14.0789
52	VAVGA	5	416.251	1	NaN	9.83185	NaN	10.9575	11.2597	11.3059	NaN	10.6846	10.6848	9.77174	9.08206	9.52975	9.6343	9.11206	NaN	9.69439	9.64409	9.95214	10.0739	9.95212	9.51501	10.6078	10.6515	10.4524
53	GLVK	4	416.286	1	NaN	8.34912	NaN	NaN	10.1018	9.97306	NaN	NaN	NaN	7.99332	NaN	NaN	9.26421	NaN	9.62344	9.05704	9.1753	NaN	NaN	NaN	NaN	NaN	9.45144	9.20814
54	KVAV	4	416.286	1	9.93997	10.6125	9.42735	9.56637	9.78875	9.66943	NaN	9.41626	9.12182	NaN	NaN	NaN	11.0565	10.2221	10.7809	NaN	7.94464	NaN	8.91944	NaN	9.49347	8.43253	8.53482	8.47874
55	TLGGA	5	418.23	1	NaN	NaN	NaN	NaN	NaN	NaN	NaN	NaN	10.2598	NaN	NaN	NaN	NaN	NaN	NaN	NaN	NaN	NaN	NaN	NaN	NaN	9.90145	9.36884	NaN
56	LAQS	4	418.23	1	12.9665	13.2106	12.5945	13.4874	13.44	13.4241	8.22134	12.7561	13.3571	12.5621	11.8301	11.8249	11.4414	12.4139	11.9995	12.2846	12.151	12.3503	13.5501	13.2729	13.1637	12.8931	13.1666	12.7864
57	KLGT	4	418.268	1	NaN	NaN	NaN	NaN	8.44667	8.49369	NaN	NaN	7.61479	7.57918	NaN	7.46571	NaN	NaN	NaN	NaN	NaN	NaN	NaN	NaN	NaN	8.37843	7.66321	7.31826
58	GLTK	4	418.266	1	NaN	NaN	NaN	10.4111	10.5654	9.39645	NaN	7.9421	NaN	NaN	NaN	NaN	11.4006	NaN	8.05805	NaN	NaN	NaN	NaN	NaN	NaN	NaN	8.55656	8.01948
59	TSLV	4	419.25	1	15.9469	16.5026	15.3702	17.4415	17.3979	17.5185	12.255	17.1536	16.9775	NaN	13.4355	14.0972	17.1327	16.2598	17.2288	15.5595	15.6552	15.7311	15.9741	16.7836	16.6343	15.9977	16.6627	16.5256
60	TGWG	4	420.189	1	14.0276	13.9722	13.7988	14.9635	15.3403	15.231	NaN	14.0467	15.118	14.5562	15.4732	15.1619	11.7384	12.8635	12.5227	15.3861	15.2977	15.823	15.0337	14.457	13.8094	15.2996	15.0538	14.8026
61	SGEK	4	420.21	1	9.59837	12.4122	11.9056	13.2432	13.4025	11.1652	8.22486	12.6831	13.01	12.115	12.2292	10.7028	10.5158	12.2405	12.4222	12.2221	12.3188	12.3027	12.7644	10.265	12.6225	13.1785	12.976	12.7141
62	DASK	4	420.209	1	9.77069	9.52994	9.08803	9.62158	13.7379	9.78616	8.27995	9.4085	7.45149	8.25606	NaN	NaN	9.68671	9.38093	11.0121	11.1784	7.81833	7.9295	NaN	8.60688	7.96375	8.59494	13.3266	13.3286
63	STLT	4	421.23	1	NaN	7.98926	NaN	8.13461	NaN	8.50023	NaN	7.28685	NaN	NaN	NaN	NaN	NaN	7.40514	NaN	NaN	NaN	8.05425	8.13187	NaN	NaN	7.71348	7.76351	7.34536
64	FALA	4	421.244	1	NaN	NaN	NaN	NaN	NaN	NaN	NaN	NaN	NaN	NaN	NaN	NaN	NaN	NaN	NaN	NaN	NaN	NaN	NaN	NaN	NaN	NaN	8.44924	8.58194
65	VMSS	4	423.192	1	13.0729	13.8221	12.1742	15.3333	15.5858	15.3977	10.0178	15.4746	15.0098	14.2929	9.53062	11.7181	15.1403	12.6604	14.7602	13.7935	13.386	13.8194	12.5385	13.9236	14.0459	12.63	14.785	14.7425
66	FVGT	4	423.225	1	8.88592	NaN	8.6716	9.41842	NaN	NaN	NaN	NaN	NaN	9.3765	NaN	NaN	NaN	NaN	NaN	NaN	NaN	NaN	NaN	NaN	NaN	NaN	9.03206	8.76314
67	FTGT	4	425.204	1	8.00003	8.52903	NaN	8.62569	NaN	8.53726	NaN	7.30065	7.84256	NaN	NaN	NaN	NaN	NaN	NaN	7.73038	7.59885	NaN	NaN	8.67959	8.55601	NaN	7.53432	NaN
68	HVLG	4	425.249	1	11.1247	11.5863	10.5521	9.1139	9.0723	8.90082	NaN	NaN	9.35654	9.8825	10.6537	10.9297	10.244	10.6842	10.9076	10.8133	11.3653	10.722	12.3446	11.9001	11.7627	9.5676	8.5759	8.29674
69	LPPV	4	425.276	1	NaN	13.5694	14.3511	13.1386	13.5435	13.7444	9.19921	11.9706	13.5472	12.463	14.0627	13.5137	12.26	14.4996	12.9309	13.6504	14.474	14.0658	13.7376	13.9352	12.9392	13.7217	13.2803	13.0557
70	LPVP	4	425.276	1	14.9749	NaN	NaN	NaN	NaN	NaN	NaN	NaN	NaN	NaN	NaN	NaN	NaN	NaN	NaN	13.6504	NaN	NaN	13.7376	NaN	12.9392	NaN	13.2803	13.0557
71	VLPV	4	427.292	1	14.9617	15.3528	14.277	15.8562	15.9619	15.7879	10.695	15.6855	15.6795	15.9347	15.3957	15.9004	15.2852	14.9445	15.3847	15.9118	16.0059	16.0952	16.2531	15.8178	15.7205	15.372	15.4383	15.3109
72	AAGLP	5	428.252	1	NaN	NaN	NaN	NaN	NaN	NaN	NaN	NaN	NaN	7.95994	8.13359	8.56533	NaN	NaN	NaN	NaN	NaN	NaN	NaN	NaN	NaN	NaN	9.16251	9.14383
73	LLAL	4	429.308	1	NaN	NaN	NaN	8.90609	8.25021	NaN	NaN	7.83696	NaN	7.65575	NaN	NaN	NaN	NaN	NaN	NaN	NaN	NaN	8.26826	8.20612	6.53775	7.46462	7.10877	NaN
74	GVQK	4	431.262	1	12.7	NaN	NaN	NaN	12.7412	12.1336	NaN	NaN	NaN	NaN	NaN	NaN	14.1362	NaN	13.0945	11.4995	10.9305	NaN	NaN	12.809	NaN	NaN	12.0711	NaN
75	LSLV	4	431.286	1	8.58226	8.92579	8.44972	8.7941	8.61851	9.09989	NaN	7.54872	8.44115	NaN	NaN	NaN	8.74533	9.48565	9.64218	NaN	8.07889	7.26118	8.90394	9.61464	9.57721	7.60056	7.78242	7.03495
76	VAVGS	5	432.246	1	NaN	9.18799	8.79349	9.82125	10.4485	10.622	NaN	9.29182	9.86834	8.86832	8.84198	9.23649	NaN	NaN	8.6873	9.34139	9.46091	9.54795	8.77464	NaN	9.17558	9.99862	9.91129	9.77897
77	VLNS	4	432.246	1	8.52609	8.79388	NaN	9.61127	9.27598	9.86772	NaN	9.25026	8.8137	7.83396	NaN	NaN	9.17478	9.21506	9.76348	NaN	NaN	NaN	NaN	9.1979	8.75791	8.23262	8.49629	8.72689
78	LGDK	4	432.246	1	6.98312	NaN	NaN	NaN	8.58239	8.64165	NaN	7.45865	8.37748	NaN	7.45462	7.87154	NaN	7.1437	NaN	7.8168	8.14253	8.342	8.18903	7.67099	7.8704	7.95824	10.4071	10.1843
79	VTDV	4	433.23	1	13.8132	13.8128	13.4627	13.4474	13.3195	13.588	9.20324	12.3893	13.4911	12.2725	11.8208	12.7404	12.1955	14.4245	12.3265	13.3504	13.2701	13.5591	12.8944	13.8865	13.5353	12.6506	12.9928	12.9399
80	SLVD	4	433.23	1	14.6438	15.0607	14.1608	14.8823	15.3086	14.9838	9.73456	14.3119	14.8345	15.4003	15.0554	15.6275	13.7755	14.8557	14.3474	15.0482	14.3814	14.9727	15.9836	15.8014	15.0864	14.9983	14.6548	14.4457
81	SLLT	4	433.266	1	14.067	14.6654	13.5804	16.7161	16.5492	16.5787	11.1961	16.0717	16.3555	15.6042	15.0833	15.3586	14.9186	14.275	15.218	12.0279	14.4395	14.8487	15.7512	15.4284	15.4248	16.0794	15.8431	15.5736
82	TLNS	4	434.225	1	14.1276	14.5399	NaN	15.3109	14.7633	14.8503	10.0981	13.8502	15.2531	13.7393	13.0664	13.7157	14.4607	14.3687	15.0427	NaN	NaN	13.3913	14.6787	15.1767	15.39	14.1663	14.1418	13.658
83	GFLV	4	435.261	1	14.3177	15.0088	14.0083	16.2732	16.0454	16.4083	10.4982	15.5558	15.1846	13.8997	12.4526	12.3377	16.1287	14.6926	16.1112	12.911	13.4482	13.1048	14.5537	15.3608	15.2567	14.094	14.5891	14.5022
84	TGCVG	5	436.184	1	NaN	NaN	7.76399	8.84722	9.14506	9.09281	NaN	NaN	6.87602	8.44341	7.4555	NaN	NaN	NaN	NaN	9.13727	9.11582	9.59206	9.19641	8.38122	NaN	9.30957	8.99478	8.68045
85	LAHP	4	437.251	1	13.0549	11.901	11.0872	14.3562	12.5808	13.7506	9.22914	NaN	14.1483	11.1524	11.8329	11.9884	11.7397	13.1504	11.9582	12.4544	11.4361	11.8997	12.4271	12.2805	11.6592	12.6604	11.966	11.5782
86	YGAK	4	438.236	1	11.304	11.3591	10.8967	14.2049	14.4638	14.5375	8.95187	13.967	11.3679	12.0401	NaN	7.37021	12.8581	11.7845	12.6675	12.5507	12.0992	12.5822	7.75709	11.8925	10.9002	12.0761	14.1588	14.0609
87	KYGA	4	438.236	1	12.28	12.9416	11.6768	11.1256	11.1119	NaN	NaN	10.3197	12.6117	NaN	12.4171	12.1781	NaN	10.7908	11.7147	NaN	10.5393	10.6226	12.3043	12.632	10.9451	12.5801	10.1508	9.89029
88	VMSS	4	439.186	1	8.62596	9.47846	6.37885	11.0854	11.3074	11.1716	NaN	11.2428	9.62938	10.0904	NaN	7.68292	10.75	7.43646	10.5149	8.18982	9.01404	9.50212	8.3085	9.45357	9.85089	8.42929	10.6093	10.5503
89	SLYG	4	439.22	1	NaN	NaN	NaN	NaN	NaN	NaN	NaN	NaN	12.1137	13.0648	12.7956	12.8629	NaN	NaN	NaN	12.1029	NaN	11.8414	NaN	12.1358	11.3069	12.5121	11.5371	11.2457
90	TGYT	4	441.198	1	9.84528	10.333	9.03106	9.30007	10.2556	10.1022	NaN	9.46177	8.35958	10.5541	9.65419	8.60926	8.2815	NaN	7.86395	11.1365	11.2156	11.285	8.63105	9.44198	NaN	9.41955	10.2538	10.3866
91	LLPV	4	441.307	1	14.4263	14.7928	14.253	15.5803	15.7103	15.8867	10.4879	14.4736	15.467	14.3711	13.7589	14.6691	13.8175	15.435	14.8414	15.1095	15.0858	15.3651	15.2409	15.312	15.2561	15.1128	15.2546	15.0885
92	LLVP	4	441.307	1	NaN	14.7928	NaN	NaN	15.7103	NaN	NaN	14.4736	NaN	14.3711	13.7589	14.6691	13.8175	NaN	14.8414	NaN	NaN	NaN	NaN	NaN	NaN	15.1128	15.2546	15.0885
93	VLPL	4	441.307	1	14.4204	15.1264	14.3019	14.9825	14.7669	15.0816	9.70825	13.692	14.7618	13.4024	12.9796	13.2837	13.6746	15.2932	14.8576	14.5037	15.1667	15.0414	15.4378	15.5298	15.6978	14.2989	14.1028	13.8884
94	VGPLG	5	442.267	1	8.9026	8.71323	NaN	NaN	8.60998	NaN	NaN	NaN	NaN	NaN	NaN	NaN	NaN	NaN	NaN	NaN	NaN	NaN	9.57166	NaN	8.89444	NaN	8.12704	NaN
95	VAVGV	5	444.283	1	NaN	8.24116	NaN	9.24952	NaN	9.57183	NaN	8.91176	9.34351	NaN	NaN	NaN	NaN	9.13093	9.24857	8.39194	8.62161	8.76373	NaN	NaN	8.99257	NaN	8.84149	NaN
96	SSPGV	5	446.226	1	14.5047	14.0563	NaN	14.067	14.2236	14.5162	NaN	13.1186	14.1668	12.7321	13.3607	13.1354	12.418	14.8723	13.5471	13.7794	14.4127	14.2442	14.3142	14.4769	14.1363	14.1464	13.8478	13.6554
97	VAGVT	5	446.262	1	NaN	NaN	NaN	10.0122	NaN	NaN	NaN	NaN	NaN	NaN	NaN	NaN	NaN	NaN	NaN	NaN	NaN	NaN	NaN	NaN	NaN	NaN	9.71269	9.40871
98	NLLS	4	446.262	1	12.214	12.5468	11.4088	11.5167	11.5338	NaN	NaN	NaN	11.314	12.1049	12.1211	12.4158	12.1761	NaN	12.6123	12.4661	12.0313	12.0616	NaN	13.3661	13.0697	NaN	11.3289	11.2648
99	SLVK	4	446.298	1	NaN	NaN	NaN	NaN	NaN	NaN	NaN	NaN	NaN	NaN	NaN	NaN	NaN	NaN	NaN	NaN	NaN	NaN	NaN	NaN	NaN	NaN	6.45549	6.67506
100	NGAW	4	447.2	1	NaN	NaN	NaN	NaN	NaN	9.17955	NaN	9.28699	NaN	NaN	NaN	NaN	9.89817	NaN	9.47442	NaN	NaN	NaN	8.81636	NaN	NaN	8.02725	8.89784	8.36251
101	NNLS	4	447.221	1	10.9127	10.9314	NaN	10.4743	10.9988	10.5045	NaN	10.2526	10.6419	10.704	11.0215	10.9961	8.96374	NaN	8.97936	10.6454	10.6485	10.7806	11.5123	10.8985	10.8518	10.7397	10.2243	10.2307
102	STLQ	4	448.24	1	NaN	10.8958	9.94652	NaN	11.6644	12.2042	NaN	NaN	11.6855	NaN	NaN	NaN	NaN	NaN	11.0746	NaN	NaN	NaN	NaN	11.5703	12.1915	NaN	10.7479	NaN
103	YLGP	4	449.239	1	NaN	NaN	NaN	7.70379	NaN	8.14353	NaN	7.56463	NaN	7.85808	7.09283	7.2311	7.86671	NaN	NaN	NaN	NaN	NaN	NaN	NaN	NaN	7.79379	7.25906	7.4328
104	LFAV	4	449.275	1	NaN	7.497	NaN	NaN	NaN	8.4284	NaN	8.38686	NaN	NaN	NaN	NaN	NaN	NaN	8.42918	NaN	NaN	7.63594	NaN	8.17025	8.91362	NaN	NaN	NaN
105	WGST	4	450.203	1	13.8485	14.2091	13.4921	NaN	12.8143	NaN	NaN	NaN	NaN	NaN	14.6874	14.9722	NaN	12.8902	NaN	NaN	NaN	NaN	15.2438	14.3106	14.2834	14.5792	12.3873	NaN
106	AFGR	4	450.246	1	NaN	NaN	NaN	9.23471	10.4662	10.2053	NaN	9.77995	NaN	NaN	NaN	NaN	NaN	NaN	NaN	NaN	NaN	NaN	NaN	NaN	NaN	NaN	8.71405	NaN
107	FTLA	4	451.256	1	NaN	NaN	NaN	NaN	9.03371	NaN	NaN	NaN	7.98044	8.60188	NaN	NaN	8.59114	NaN	9.43048	NaN	9.33113	9.20509	7.95326	9.39685	9.00005	NaN	7.43822	NaN
108	MSSK	4	452.216	1	NaN	NaN	NaN	NaN	NaN	NaN	NaN	NaN	NaN	NaN	NaN	NaN	NaN	NaN	NaN	NaN	NaN	NaN	NaN	NaN	NaN	NaN	8.12633	7.4018
109	QYGS	4	454.194	1	10.7709	10.3859	10.3081	NaN	NaN	8.06981	NaN	NaN	7.10384	7.55677	9.26012	8.62035	NaN	8.53671	NaN	8.37499	NaN	8.76382	8.54912	9.50518	NaN	8.62983	7.63748	7.48606
110	YVSS	4	455.215	1	9.8944	10.1384	9.60195	12.2141	10.8882	10.9896	NaN	9.90324	11.37	9.56814	NaN	NaN	NaN	11.0097	9.93156	10.1502	10.4012	10.4078	10.5226	10.9396	11.5213	11.1118	10.5545	10.0789
111	LGEH	4	455.226	1	12.5048	12.5394	12.1228	10.6298	11.4771	11.7409	NaN	9.93897	10.9269	NaN	11.9566	11.6417	10.6395	12.8088	10.9305	12.1164	12.5602	12.373	11.751	12.1835	10.6452	11.5167	11.4769	11.4383
112	GEHN	4	456.184	1	12.9215	13.086	NaN	12.5919	NaN	13.044	NaN	NaN	12.6417	NaN	11.3822	10.8958	NaN	14.2199	13.8574	12.1029	12.6102	12.1351	13.0512	13.4141	12.687	12.2564	12.0193	11.7188
113	NLPL	4	456.282	1	NaN	8.75006	7.82735	NaN	NaN	8.69737	NaN	NaN	10.2003	8.40733	9.77104	9.82285	8.14244	10.2539	10.0923	9.49357	NaN	NaN	10.5503	10.4716	10.119	NaN	8.5913	8.05914
114	VLGAP	5	456.282	1	NaN	NaN	NaN	NaN	NaN	NaN	NaN	NaN	NaN	NaN	NaN	NaN	NaN	NaN	NaN	NaN	NaN	NaN	NaN	NaN	NaN	11.4435	10.6695	NaN
115	LLLV	4	457.336	1	7.50228	7.52215	7.16716	8.36197	8.37914	8.84235	NaN	7.54725	7.9154	NaN	NaN	NaN	9.08083	9.62786	8.73459	NaN	NaN	NaN	7.85321	7.59496	8.55018	NaN	7.22052	NaN
116	TEPL	4	459.246	1	12.789	13.1542	12.3141	NaN	NaN	11.4551	NaN	NaN	10.3139	NaN	NaN	NaN	13.4198	13.7098	13.568	NaN	NaN	NaN	12.408	13.2626	12.2853	NaN	10.9198	NaN
117	VLEV	4	459.28	1	NaN	NaN	NaN	NaN	NaN	NaN	NaN	7.04143	8.09216	NaN	NaN	NaN	NaN	8.33837	NaN	NaN	NaN	NaN	NaN	NaN	NaN	NaN	6.81416	NaN
118	LLLT	4	459.318	1	NaN	10.1931	8.90557	7.65967	11.5296	11.526	NaN	11.7787	11.0837	11.8948	9.35437	10.1158	10.4125	9.9489	10.5612	NaN	11.1949	10.9276	11.1965	10.6014	NaN	10.4354	10.9667	10.9561
119	KLAK	4	459.33	1	NaN	5.40003	4.8599	6.95447	7.29857	7.19348	NaN	6.56467	NaN	NaN	NaN	NaN	7.46341	NaN	5.52804	6.01988	5.41231	NaN	NaN	4.79056	NaN	NaN	5.77821	6.15542
120	LGVDG	5	460.241	1	NaN	NaN	NaN	NaN	NaN	NaN	NaN	NaN	NaN	NaN	NaN	NaN	NaN	NaN	NaN	NaN	NaN	NaN	NaN	NaN	NaN	11.0463	9.51609	9.59188
121	ALEK	4	460.277	1	10.8164	10.4784	10.5678	9.01926	15.1245	9.75355	10.0359	7.79059	9.02051	7.63577	14.1965	14.5332	11.2382	12.1414	16.3844	8.8938	14.1701	8.36248	15.0976	16.1089	15.8717	9.21045	14.699	8.61434
122	AELK	4	460.277	1	NaN	NaN	NaN	7.97575	8.06692	NaN	NaN	7.41385	NaN	NaN	NaN	NaN	10.0696	8.44566	10.0867	NaN	NaN	NaN	NaN	NaN	NaN	NaN	7.69136	NaN
123	LTVE	4	461.261	1	14.1646	14.33	13.4443	10.1735	10.4512	11.0609	NaN	9.37919	12.3568	12.2442	14.9901	14.6501	11.6075	13.4497	12.9609	12.4776	13.9259	12.8746	16.2538	14.9367	14.6695	13.0843	10.2184	9.80222
124	TALGT	5	462.256	1	14.6041	15.0195	14.0424	14.5867	14.7468	14.5588	9.25681	14.4655	14.5133	15.2407	15.0975	15.232	14.2529	14.1966	14.4517	15.1179	14.9394	15.1006	15.9528	15.4618	15.0683	14.6275	14.3206	14.1531
125	TDVK	4	462.257	1	NaN	8.14082	7.87447	9.22184	9.30396	9.4098	NaN	NaN	NaN	NaN	NaN	NaN	NaN	9.50354	NaN	8.62223	NaN	8.91976	NaN	NaN	8.76023	7.99085	9.06019	8.70662
126	QTLT	4	462.257	1	NaN	NaN	9.53117	NaN	NaN	NaN	NaN	NaN	9.40913	NaN	NaN	NaN	NaN	NaN	9.80839	9.41733	10.104	10.2028	NaN	NaN	NaN	NaN	9.49302	NaN
127	EFAP	4	463.219	1	12.8134	12.2826	12.0593	12.9498	13.0287	13.5202	NaN	12.2955	13.0478	12.1594	12.1005	12.5249	13.3838	NaN	NaN	13.3053	13.1782	13.3331	13.3698	13.8198	13.3331	13.091	12.9955	12.8995
128	SSSLA	5	464.235	1	NaN	NaN	NaN	8.77559	9.14317	8.99157	NaN	8.39188	8.66159	8.7258	NaN	NaN	NaN	NaN	NaN	NaN	NaN	NaN	NaN	NaN	NaN	NaN	8.95796	8.83603
129	MLAD	4	465.203	1	NaN	NaN	NaN	10.8305	10.1525	9.9902	NaN	9.32885	10.4086	9.86168	9.88696	NaN	NaN	NaN	NaN	8.82839	NaN	9.70457	9.48985	NaN	NaN	10.5504	9.36384	9.64713
130	LYAV	4	465.271	1	NaN	NaN	NaN	10.2114	NaN	NaN	NaN	NaN	NaN	NaN	NaN	NaN	9.56545	NaN	NaN	NaN	9.08475	NaN	NaN	NaN	NaN	10.2177	10.3618	NaN
131	FADN	4	466.194	1	NaN	NaN	NaN	NaN	NaN	NaN	NaN	NaN	NaN	NaN	NaN	NaN	NaN	NaN	NaN	NaN	NaN	NaN	NaN	NaN	NaN	7.86566	7.71257	7.29892
132	GYDL	4	467.215	1	12.5145	12.6154	12.1891	13.856	14.2653	14.3819	9.00115	13.368	13.899	13.9439	14.1494	14.1564	11.2458	11.7994	11.7753	14.2898	14.1555	14.659	13.8485	13.3846	12.4016	14.1151	14.1937	14.006
133	YVDA	4	467.214	1	15.2538	15.4964	14.7677	16.3431	16.6169	16.6514	NaN	15.6252	16.3327	15.0591	14.935	15.6335	14.5007	15.6492	15.0663	15.828	15.7626	16.0905	15.8587	16.225	15.8285	15.992	16.112	15.9298
134	NYAT	4	468.21	1	10.0851	10.9305	9.71896	10.4384	10.4034	11.3392	NaN	12.2269	8.45127	10.3602	NaN	8.17068	12.3705	NaN	10.2651	9.33268	10.5155	10.5881	8.35413	NaN	9.29248	8.58405	10.359	10.6807
135	YQAS	4	468.21	1	10.0518	9.94661	9.98684	10.2158	NaN	9.06543	NaN	NaN	9.79622	NaN	NaN	NaN	NaN	10.2885	9.333	NaN	9.59613	9.35219	9.5343	9.8466	10.402	9.90185	8.81677	NaN
136	YSAK	4	468.248	1	NaN	NaN	NaN	8.4802	9.05175	8.77363	NaN	8.20783	NaN	NaN	NaN	NaN	NaN	NaN	NaN	NaN	NaN	NaN	NaN	NaN	NaN	NaN	8.94554	8.8338
137	YGTK	4	468.246	1	11.31	10.8995	10.2734	14.0946	14.3608	14.1723	9.05573	10.0032	NaN	13.4812	NaN	NaN	13.4681	NaN	11.5619	13.5547	12.9605	13.893	NaN	NaN	9.19555	9.91284	13.9784	14.023
138	AALPV	5	470.298	1	NaN	NaN	NaN	8.64973	8.56606	7.44264	NaN	NaN	9.34762	NaN	9.46119	9.55485	7.8861	NaN	9.15329	8.85617	NaN	NaN	10.0395	9.44125	9.15187	9.55025	7.61325	NaN
139	VAALP	5	470.297	1	11.3682	11.3323	11.1562	NaN	11.0025	NaN	NaN	NaN	NaN	NaN	10.7792	10.7781	10.0474	10.3264	10.3726	NaN	10.889	10.9185	NaN	11.4519	NaN	NaN	10.5597	NaN
140	NGPLA	5	471.256	1	11.8374	10.9182	11.5062	10.54	10.691	10.7986	NaN	9.28429	10.2002	9.47364	11.3343	10.9101	9.86376	11.6237	10.0453	10.634	11.2592	11.2449	11.8509	11.0191	10.6406	10.2719	9.86629	9.53368
141	PNGGK	5	472.252	1	12.704	13.1585	12.1362	10.5426	NaN	NaN	NaN	NaN	NaN	11.9896	11.5056	11.1976	12.1958	NaN	NaN	12.4397	NaN	NaN	NaN	13.5663	NaN	NaN	11.0828	NaN
142	LATPA	5	472.278	1	16.5403	16.7569	16.0679	17.0738	17.2067	17.5066	11.8429	NaN	16.7556	17.0052	17.1484	17.143	16.9313	NaN	17.2822	16.6647	16.7086	16.6148	17.3407	17.4189	17.0415	17.2992	16.714	16.6919
143	SLPR	4	472.288	1	16.2732	16.3887	15.8288	15.6999	15.7708	15.8534	10.0981	15.1065	15.1178	15.6999	15.8099	15.6991	16.1558	16.5986	16.354	15.5525	15.7133	15.4473	16.4186	16.6029	15.9251	15.8088	15.125	15.1696
144	LLAVG	5	472.314	1	10.0316	NaN	NaN	NaN	NaN	NaN	NaN	11.8393	10.3692	9.60015	NaN	NaN	NaN	NaN	NaN	9.77053	10.7707	10.8145	NaN	NaN	NaN	10.8135	11.1472	10.9139
145	QVLN	4	473.273	1	9.94108	9.85501	NaN	10.1595	NaN	9.90339	NaN	NaN	NaN	11.0618	10.4537	10.1456	NaN	NaN	NaN	NaN	NaN	NaN	9.17282	NaN	NaN	10.1857	9.53265	9.60267
146	LLDL	4	473.297	1	14.1387	14.4635	13.6187	15.3231	14.9592	15.1995	10.1378	14.3854	15.1458	13.7146	13.0015	14.0941	14.4321	14.5246	14.0246	13.5337	13.722	13.6242	14.4845	15.3265	15.0093	14.6913	14.4015	14.1898
147	LLEV	4	473.297	1	7.89677	NaN	NaN	NaN	NaN	NaN	NaN	NaN	9.32668	NaN	NaN	6.76008	8.29073	9.77286	NaN	10.845	10.4923	10.899	9.83897	8.15911	7.4215	NaN	7.51078	7.32496
148	VAVGK	5	473.31	1	NaN	NaN	NaN	7.80506	NaN	8.07186	NaN	7.22424	NaN	NaN	NaN	NaN	NaN	NaN	NaN	6.37544	NaN	6.53127	NaN	NaN	NaN	NaN	7.78458	7.73149
149	LLDN	4	474.256	1	13.3192	13.6063	13.0131	12.4477	12.9819	13.2369	7.91403	11.5492	12.7924	12.4179	12.7204	13.1077	12.2746	13.3715	12.6175	14.039	13.9142	14.3849	13.5346	13.8903	12.9112	13.0568	13.0822	13.039
150	LGADV	5	474.258	1	9.71343	NaN	NaN	11.8926	NaN	NaN	NaN	NaN	9.32791	9.27866	9.4159	9.29058	NaN	NaN	NaN	9.15275	9.64348	9.32472	9.54428	NaN	9.04814	9.66671	9.11055	9.18625
151	VLDK	4	474.293	1	11.9281	13.9162	11.7447	13.0189	13.2608	11.9893	8.32759	12.5656	13.2874	9.43125	10.1729	10.1231	10.9549	14.1796	11.8664	12.9296	11.6769	11.3766	13.4295	12.5321	14.1498	13.4429	10.9689	10.8111
152	AGTLL	5	474.292	1	14.4298	14.6132	NaN	14.2783	14.4745	NaN	9.17209	NaN	NaN	14.1067	NaN	NaN	NaN	14.5383	NaN	NaN	NaN	NaN	14.7442	14.7541	14.1226	NaN	13.5729	13.4358
153	TLLK	4	474.33	1	NaN	NaN	NaN	NaN	NaN	NaN	NaN	NaN	NaN	NaN	NaN	NaN	9.31754	NaN	NaN	NaN	NaN	NaN	NaN	NaN	NaN	NaN	7.23358	7.6688
154	TLLE	4	475.277	1	NaN	NaN	NaN	NaN	10.2518	9.97913	NaN	10.0546	NaN	11.2156	10.5305	11.4631	NaN	NaN	NaN	10.582	NaN	10.1135	10.6527	NaN	9.61667	10.4878	9.81436	NaN
155	LFVP	4	475.29	1	8.46166	NaN	NaN	NaN	NaN	NaN	NaN	NaN	NaN	NaN	NaN	NaN	NaN	NaN	NaN	NaN	NaN	NaN	8.70739	NaN	NaN	9.16193	8.97701	NaN
156	VGVDS	5	476.236	1	10.7063	10.7857	10.4094	10.418	10.6637	10.7079	NaN	10.2938	10.5155	10.807	10.9493	11.1686	10.5491	11.2013	10.39	10.8875	NaN	10.831	NaN	NaN	NaN	11.2012	10.9307	10.8242
157	TSLVG	5	476.273	1	10.6742	10.6827	10.2689	10.7889	11.0776	11.1125	NaN	NaN	10.5504	NaN	NaN	10.6351	NaN	NaN	NaN	NaN	9.72632	9.6765	10.6493	10.6546	10.2347	10.9956	10.5832	10.1584
158	LTDK	4	476.273	1	9.53324	10.0892	6.99193	9.83561	9.94697	9.90963	NaN	9.68507	9.83544	10.3088	10.5026	10.5599	9.72783	9.49965	10.0184	9.99542	6.32193	10.2398	7.77693	7.19169	10.4001	9.85119	9.42225	9.30259
159	WGSK	4	477.247	1	8.74039	8.71663	8.05925	11.7292	12.0341	11.0228	NaN	11.7195	9.56323	11.6495	NaN	NaN	8.77117	9.21085	10.8469	10.9136	11.2132	7.61227	7.22826	9.54667	8.84977	8.20529	11.7268	7.23344
160	SMLK	4	478.27	1	12.563	12.733	12.0982	12.222	12.4071	12.3972	6.91725	11.6988	12.2482	12.2775	11.6576	11.8935	11.8324	12.3868	12.3799	12.3589	12.1041	12.488	12.7231	12.9084	12.5356	12.1426	11.7931	11.4786
161	FGGAGA	6	479.226	1	NaN	NaN	NaN	9.21913	9.64773	9.95903	NaN	7.63296	8.96635	8.35563	NaN	8.78944	NaN	NaN	NaN	9.77162	10.4701	10.62	NaN	8.73217	8.63761	NaN	9.08699	8.73474
162	FVDV	4	479.251	1	14.2536	14.827	12.9644	NaN	13.3725	13.5336	8.09778	12.9501	12.7029	14.6661	12.2052	14.0715	14.9708	13.9282	15.2734	14.6296	14.5745	14.5603	14.9898	15.5581	15.683	11.9412	12.6536	12.7243
163	FSET	4	483.209	1	14.6737	NaN	NaN	15.3738	15.5186	NaN	NaN	NaN	15.1773	NaN	13.3743	NaN	15.7639	15.2075	NaN	15.1137	15.008	15.1464	NaN	15.7153	15.6572	14.3902	14.8074	14.7156
164	AALPL	5	484.313	1	13.605	13.7477	13.5453	12.7595	12.9828	12.9412	7.74879	12.0724	12.4575	12.4013	12.6968	12.9864	13.4943	14.5362	14.2644	13.1136	12.7626	12.9933	13.964	13.8385	13.4042	12.8169	12.5286	12.285
165	LASPV	5	486.294	1	13.8107	14.6653	13.3807	12.5788	12.9331	13.2119	7.39067	12.6769	12.3845	13.551	14.057	13.4557	13.6898	13.6364	13.9336	13.393	14.37	13.5747	14.9309	14.8791	14.4654	13.1476	12.3547	12.388
166	LGNPS	5	487.252	1	NaN	NaN	NaN	NaN	NaN	NaN	NaN	NaN	NaN	NaN	NaN	NaN	NaN	NaN	NaN	NaN	NaN	NaN	NaN	NaN	NaN	12.5532	11.4982	NaN
167	VALGK	5	487.324	1	11.3185	9.94915	9.75355	13.6654	13.9368	13.8938	7.91636	13.7148	NaN	13.4032	NaN	NaN	14.1743	9.20758	11.9197	13.5171	13.1199	13.7776	NaN	8.15903	NaN	NaN	13.3145	13.6721
168	QVLK	4	487.324	1	NaN	NaN	NaN	8.28744	8.99207	9.44412	NaN	8.19374	NaN	NaN	NaN	NaN	9.57094	NaN	NaN	NaN	7.05029	NaN	NaN	NaN	NaN	7.73327	7.42815	NaN
169	VADPS	5	488.236	1	13.571	13.5915	12.81	10.6517	11.1288	11.24	NaN	9.82508	NaN	10.9382	11.6136	11.5899	12.4436	13.0921	12.2377	12.3605	12.8517	12.4828	13.3733	13.5538	12.8812	11.1763	11.1024	11.1212
170	GLLEG	5	488.273	1	NaN	NaN	NaN	NaN	NaN	NaN	NaN	NaN	NaN	11.5343	NaN	NaN	NaN	NaN	NaN	NaN	NaN	NaN	NaN	NaN	NaN	12.9197	12.047	11.8326
171	LGTVV	5	488.309	1	15.7729	16.9057	15.6246	18.2413	17.8028	18.4505	12.8358	18.0457	17.3221	14.1047	11.5647	11.0329	18.7774	17.1185	18.8196	15.1367	15.2055	14.7313	16.3124	17.4735	17.7152	15.6695	16.531	16.4221
172	LDLK	4	488.31	1	NaN	NaN	7.75082	NaN	NaN	9.91109	NaN	NaN	NaN	NaN	NaN	NaN	NaN	NaN	NaN	NaN	NaN	NaN	NaN	9.85357	NaN	10.0517	9.35654	8.64598
173	TVGLV	5	488.309	1	NaN	NaN	NaN	10.0048	10.0624	9.9731	NaN	9.82519	9.86615	NaN	NaN	NaN	NaN	NaN	NaN	NaN	8.56172	NaN	NaN	9.21729	NaN	9.26134	9.54191	9.10113
174	NAGDL	5	489.231	1	10.5792	10.4058	10.2165	9.8598	9.56953	9.54121	NaN	NaN	9.6344	NaN	NaN	9.2409	9.65298	NaN	NaN	8.71045	NaN	8.96794	9.45706	10.0793	9.50691	8.87445	7.75242	NaN
175	ELEV	4	489.256	1	NaN	NaN	NaN	10.7421	10.5501	11.1289	NaN	11.595	11.0938	10.6067	NaN	11.4458	NaN	NaN	NaN	NaN	NaN	NaN	NaN	NaN	NaN	12.0513	11.5096	11.3071
176	AGTLK	5	489.302	1	7.95259	7.53817	7.66611	8.22562	7.57081	7.82549	NaN	NaN	8.71144	NaN	7.39388	7.50846	NaN	9.60833	8.8258	7.88481	7.44163	7.67124	8.71666	7.75874	9.72356	8.29784	7.38058	NaN
177	FLLP	4	489.307	1	9.63956	NaN	8.9419	10.0534	NaN	NaN	NaN	9.39183	9.33692	9.91327	9.27511	10.1655	NaN	8.95395	7.02363	9.47565	8.95052	9.18653	9.67601	NaN	NaN	9.36314	9.50979	9.3644
178	LGVDS	5	490.25	1	NaN	NaN	7.92324	NaN	NaN	NaN	NaN	NaN	NaN	NaN	8.14518	8.19875	NaN	8.87336	NaN	7.68059	NaN	7.74079	NaN	NaN	NaN	8.28849	NaN	NaN
179	VTDVG	5	490.251	1	9.97793	9.40032	9.55598	8.94516	NaN	NaN	NaN	7.39766	9.52376	NaN	9.20535	8.92515	NaN	11.3131	9.43876	9.23731	8.78195	NaN	9.56494	9.85493	10.3271	9.69753	8.5574	NaN
180	QLGSS	5	491.246	1	14.6076	14.6137	13.7419	15.1437	14.7943	13.7185	9.70161	12.5792	14.9038	14.1553	15.1067	15.2771	14.8096	NaN	14.7686	14.0709	13.3142	13.0144	15.2131	14.896	14.3416	14.7759	14.0357	12.3316
181	NMVK	4	491.266	1	NaN	NaN	NaN	NaN	9.13857	NaN	NaN	7.92836	NaN	NaN	NaN	NaN	NaN	NaN	NaN	NaN	NaN	NaN	NaN	NaN	NaN	NaN	8.55198	8.47179
182	GSTVK	5	491.283	1	NaN	11.7124	NaN	7.53914	12.2876	11.9591	NaN	11.5427	NaN	12.0761	NaN	NaN	12.3548	6.18892	7.21233	11.2749	NaN	NaN	NaN	NaN	NaN	NaN	11.8523	NaN
183	WEGT	4	492.211	1	11.6869	11.9399	11.0964	NaN	10.4722	10.8951	NaN	NaN	10.162	9.20562	NaN	NaN	11.4958	12.2808	11.7155	10.7183	11.9171	11.1431	NaN	12.9907	NaN	NaN	9.84777	NaN
184	HSYS	4	493.205	1	11.4784	12.237	11.0268	13.597	14.1356	14.094	8.84679	13.7329	13.4788	13.7197	NaN	11.4617	12.132	9.59529	11.6764	13.728	13.6366	14.1344	12.8456	12.635	11.9259	12.526	13.6252	13.3946
185	YLPT	4	493.267	1	13.6752	NaN	13.4286	13.1927	13.1662	13.6347	8.72001	NaN	13.1236	11.6552	11.8659	12.3622	11.3475	13.9749	12.2401	13.136	14.1657	13.8077	13.0073	NaN	13.224	NaN	12.5539	12.2667
186	FVDN	4	494.225	1	13.3567	13.854	13.31	10.1327	NaN	10.0184	NaN	NaN	11.328	NaN	NaN	11.4185	NaN	12.1853	10.7253	10.7907	12.725	10.474	12.4512	13.1405	12.1475	11.0241	9.27776	NaN
187	SSSLT	5	494.247	1	9.36925	9.51879	9.09149	10.1149	10.0655	10.3976	NaN	9.18816	9.95497	8.39813	NaN	7.02833	9.1802	10.1439	10.1867	8.79524	8.99938	9.36277	9.89677	10.1419	10.3905	9.50735	9.486	9.42685
188	SMLK	4	494.266	1	8.30282	8.63366	7.92756	NaN	NaN	8.13129	NaN	8.96112	8.86807	NaN	NaN	8.05899	7.84294	NaN	8.79023	NaN	NaN	NaN	9.12435	9.22641	8.05223	NaN	8.35296	NaN
189	VTEF	4	495.245	1	11.3424	12.6829	11.0348	14.8264	13.6092	14.0226	9.39255	13.8406	15.7854	12.5275	12.0981	11.732	16.5743	14.2843	17.0467	13.2463	11.3748	12.0392	12.8042	13.8305	14.8541	15.434	13.3442	13.1469
190	YKVS	4	496.275	1	NaN	8.96546	8.18557	NaN	NaN	8.31619	NaN	NaN	NaN	9.19138	9.2878	NaN	NaN	NaN	NaN	9.25401	9.23374	9.512	9.76181	NaN	NaN	8.61183	8.35669	8.85206
191	HQLV	4	496.29	1	11.8937	NaN	11.7035	13.0897	13.3463	13.6407	NaN	12.2368	NaN	NaN	NaN	NaN	12.5315	12.7459	12.4171	11.869	12.2566	12.387	NaN	12.8485	12.4891	NaN	12.6825	12.3719
192	VLHK	4	496.325	1	NaN	NaN	6.1173	7.82308	7.79039	7.79279	NaN	7.31091	NaN	7.63551	NaN	NaN	7.26005	NaN	NaN	NaN	NaN	7.70084	NaN	NaN	NaN	NaN	7.18541	7.35518
193	YPYG	4	499.22	1	12.1505	12.4519	12.8838	12.8601	12.8133	12.539	NaN	11.5917	12.0625	12.0934	10.8525	9.75991	14.3761	12.7203	14.1641	11.7801	11.7205	11.7059	14.8205	12.53	14.4151	11.8016	11.7276	11.4497
194	HGVTS	5	500.248	1	10.1786	10.3197	9.89749	9.92438	9.87746	10.0942	NaN	8.88124	9.85646	8.801	8.43974	8.34887	9.53892	10.1269	10.077	8.83227	NaN	9.09025	10.0599	10.1603	10.083	9.17968	9.38589	8.70556
195	LPTLG	5	500.308	1	NaN	NaN	NaN	9.42976	NaN	9.3136	NaN	NaN	NaN	NaN	NaN	NaN	NaN	NaN	NaN	8.3724	8.1371	NaN	NaN	NaN	NaN	NaN	7.88449	NaN
196	TNGPL	5	501.267	1	16.3441	15.5185	15.8486	14.3177	NaN	14.5682	9.53928	12.2244	NaN	13.3202	14.9331	14.8708	NaN	NaN	NaN	14.1635	15.2641	14.6381	NaN	NaN	NaN	NaN	13.3083	12.9433
197	NGQLA	5	502.263	1	10.9305	NaN	11.1971	11.4008	11.4907	11.6917	NaN	NaN	NaN	9.5938	NaN	NaN	9.1852	NaN	9.60743	NaN	NaN	11.1413	NaN	NaN	NaN	NaN	10.6667	NaN
198	YSFS	4	503.217	1	NaN	10.8206	9.9243	11.6892	12.0243	12.1587	NaN	10.9284	11.3607	11.8915	10.8883	11.3767	10.7061	9.19943	11.1732	11.4047	11.4324	11.5985	10.8021	11.6776	11.375	11.4038	11.4088	11.3995
199	NSVLA	5	503.284	1	10.5694	11.1102	NaN	9.11949	NaN	NaN	NaN	NaN	NaN	NaN	10.8714	NaN	NaN	10.2942	NaN	10.4357	11.5446	10.5495	NaN	NaN	NaN	NaN	8.86581	NaN
200	TVER	4	504.278	1	NaN	NaN	NaN	NaN	12.5463	NaN	NaN	NaN	NaN	12.9862	NaN	NaN	NaN	NaN	NaN	13.5063	13.5144	13.382	13.3447	NaN	NaN	NaN	12.5904	12.5319
201	TASGGL	6	505.26	1	NaN	NaN	NaN	NaN	NaN	8.96391	NaN	NaN	NaN	NaN	NaN	NaN	NaN	NaN	NaN	NaN	NaN	NaN	NaN	NaN	NaN	NaN	8.59504	8.26667
202	LLYP	4	505.303	1	14.3094	14.2307	13.4038	15.5383	15.4111	12.6944	7.81685	13.6208	12.8955	15.2093	13.622	15.5693	13.9451	14.8077	13.8464	13.1806	14.8427	15.0303	15.7839	15.4047	15.3702	15.085	12.3126	13.9964
203	GAMDL	5	506.229	1	NaN	NaN	NaN	10.7588	10.6744	10.7421	NaN	NaN	NaN	NaN	NaN	10.4559	NaN	NaN	NaN	NaN	NaN	NaN	NaN	NaN	NaN	10.5666	10.3235	NaN
204	CPSVT	5	506.225	1	NaN	9.71282	NaN	10.4248	10.3653	NaN	NaN	9.86776	9.66917	NaN	NaN	NaN	NaN	9.07597	10.4855	NaN	9.3634	9.01223	10.9544	NaN	NaN	NaN	NaN	NaN
205	STLAD	5	506.247	1	NaN	NaN	NaN	8.97028	8.47798	NaN	NaN	NaN	8.9808	7.89752	8.52999	NaN	7.70672	NaN	NaN	NaN	NaN	NaN	8.60653	NaN	NaN	9.54437	7.8685	NaN
206	YQPV	4	506.262	1	17.5514	17.7118	17.2439	18.6213	18.8094	18.8472	13.7461	18.1848	18.3341	17.836	18.0399	18.03	17.2091	17.3575	17.0714	17.7742	17.5771	17.8058	18.1313	18.0429	17.6016	18.6882	18.411	18.2593
207	TSLVS	5	506.283	1	10.8872	11.2158	10.3782	11.0967	11.2787	11.3395	NaN	10.5794	11.2311	10.117	10.0481	10.4104	10.7184	11.1749	11.1894	10.0777	10.3304	10.0819	10.8035	10.9792	10.4064	NaN	10.9105	10.544
208	FLLD	4	507.282	1	11.1102	11.5339	NaN	10.0638	NaN	NaN	NaN	NaN	NaN	NaN	10.5863	10.8789	NaN	NaN	NaN	10.7298	10.9839	NaN	12.4367	11.5505	NaN	NaN	9.77624	NaN
209	NDPY	4	508.206	1	12.6504	12.9471	12.5979	11.999	11.2174	11.9135	8.18663	10.1518	12.6953	9.54971	9.96531	10.3343	13.4584	13.7616	13.4117	NaN	10.3559	9.75859	12.366	13.3297	13.2702	11.9025	10.4615	10.3726
210	GYSPS	5	510.22	1	11.3129	NaN	10.7449	NaN	10.5108	NaN	NaN	8.95898	NaN	NaN	11.7519	10.5568	NaN	9.18249	NaN	11.6789	12.3859	NaN	11.3497	NaN	9.77295	NaN	10.2723	NaN
211	EHPQ	4	510.232	1	11.1056	6.87882	10.6141	10.001	10.3212	7.79568	NaN	6.40993	7.49769	10.8875	10.8256	8.56146	10.7743	NaN	10.8935	10.8148	10.4194	10.798	7.66112	7.35078	10.6963	7.51289	9.9743	NaN
212	SYLK	4	510.293	1	NaN	NaN	10.2874	13.4651	13.9967	NaN	8.08628	9.96519	NaN	13.6557	NaN	NaN	NaN	NaN	NaN	NaN	11.7713	NaN	NaN	NaN	NaN	NaN	13.9883	NaN
213	SFGDS	5	512.2	1	NaN	NaN	NaN	NaN	NaN	NaN	NaN	NaN	NaN	NaN	NaN	NaN	NaN	NaN	NaN	NaN	NaN	NaN	NaN	NaN	NaN	11.2176	9.97717	9.8545
214	HGLVS	5	512.284	1	NaN	10.0481	9.73806	NaN	NaN	10.1491	NaN	9.06232	NaN	9.34698	9.94556	10.1371	8.82717	NaN	9.30949	9.72125	NaN	10.0536	NaN	10.2608	9.70621	9.92315	9.53744	9.20376
215	LAAHT	5	512.283	1	10.9023	10.9834	10.7998	NaN	10.5667	10.2572	NaN	NaN	10.3816	NaN	9.67638	NaN	NaN	NaN	11.1898	NaN	10.142	NaN	NaN	10.6919	10.4106	10.0875	10.541	10.06
216	VHEK	4	512.284	1	10.9424	11.2344	NaN	NaN	10.7417	NaN	NaN	NaN	NaN	NaN	NaN	NaN	10.8803	10.8165	NaN	11.2388	NaN	NaN	NaN	11.6226	NaN	10.8916	10.6169	10.2278
217	ALPLV	5	512.344	1	11.5342	12.0759	10.7956	11.7909	12.7052	12.3922	7.10471	12.3055	11.7171	12.6087	11.7663	11.6723	11.0152	10.9902	11.6854	11.8347	10.9374	11.4976	12.1931	12.3979	10.7103	11.971	11.8426	11.914
218	VVVVP	5	512.345	1	NaN	NaN	NaN	NaN	NaN	NaN	NaN	NaN	NaN	NaN	NaN	NaN	NaN	NaN	NaN	NaN	NaN	NaN	NaN	NaN	NaN	NaN	7.32758	6.75055
219	LGLPL	5	512.344	1	13.0372	10.1828	NaN	NaN	NaN	10.9103	NaN	11.7522	9.37728	NaN	NaN	NaN	11.9032	9.85854	8.90729	13.32	13.2121	13.3272	10.1605	13.3169	NaN	10.2803	12.3856	NaN
220	AVLPL	5	512.344	1	NaN	NaN	9.99476	NaN	NaN	NaN	NaN	NaN	NaN	NaN	NaN	NaN	NaN	9.85854	NaN	NaN	NaN	NaN	NaN	10.2234	9.78365	12.6652	12.3856	NaN
221	VNGGPA	6	514.263	1	NaN	NaN	NaN	NaN	7.56627	8.20349	NaN	7.67873	NaN	NaN	NaN	NaN	NaN	NaN	NaN	NaN	NaN	NaN	NaN	NaN	NaN	NaN	8.44749	8.43607
222	MPLGP	5	514.267	1	7.98376	8.28221	7.60479	NaN	NaN	NaN	NaN	NaN	NaN	NaN	NaN	NaN	NaN	NaN	9.10407	NaN	NaN	NaN	NaN	8.95264	NaN	NaN	6.96873	NaN
223	KNPR	4	514.31	1	NaN	NaN	NaN	12.4599	12.6844	NaN	NaN	12.2871	11.8771	NaN	12.8056	NaN	NaN	NaN	NaN	11.8533	NaN	11.9241	NaN	NaN	NaN	12.7369	12.3169	12.333
224	LALTP	5	514.324	1	NaN	NaN	NaN	NaN	NaN	NaN	NaN	NaN	NaN	NaN	NaN	NaN	NaN	NaN	NaN	NaN	NaN	NaN	NaN	NaN	NaN	9.63933	8.84443	NaN
225	LLGLV	5	514.359	1	10.3027	11.1076	9.92908	10.6199	10.629	10.7083	NaN	10.2175	10.1685	8.97484	NaN	NaN	10.8443	10.6792	11.6643	NaN	9.82633	NaN	11.1859	11.3387	11.6063	9.2141	9.76146	9.64883
226	LAGSAP	6	515.283	1	10.9757	NaN	10.6327	11.5759	11.5701	11.6176	NaN	10.5589	11.6172	11.5145	12.0146	12.2423	NaN	11.3171	NaN	11.4215	11.0788	11.4788	12.3849	12.2649	11.8458	12.0402	10.8314	10.506
227	LLGNV	5	515.319	1	11.6381	11.6649	11.2032	11.1397	11.2574	11.0156	NaN	10.4288	11.1389	11.7436	11.2893	11.5439	NaN	11.5119	10.6906	11.6146	11.193	11.6338	12.3705	12.0354	11.7341	11.4615	11.0317	10.8427
228	LKSAP	5	515.328	1	NaN	NaN	NaN	9.0314	8.78243	9.04014	NaN	8.81802	NaN	9.19813	NaN	NaN	NaN	NaN	NaN	9.2181	9.32126	9.17292	NaN	NaN	10.4066	7.91573	8.05657	7.79164
229	LGVEV	5	516.302	1	NaN	NaN	NaN	NaN	NaN	NaN	NaN	NaN	NaN	NaN	NaN	NaN	NaN	NaN	NaN	NaN	NaN	NaN	NaN	NaN	NaN	9.71212	9.00569	NaN
230	VTNPS	5	517.262	1	10.1977	NaN	NaN	NaN	8.97326	9.13199	NaN	NaN	8.27048	NaN	NaN	NaN	NaN	11.829	11.3541	NaN	NaN	8.81422	9.76697	NaN	9.05435	9.15656	8.65035	NaN
231	AELGK	5	517.299	1	NaN	NaN	NaN	10.312	10.6468	NaN	NaN	10.4087	NaN	NaN	NaN	NaN	NaN	NaN	NaN	NaN	NaN	NaN	NaN	NaN	NaN	NaN	10.1497	10.2656
232	LAQSV	5	517.299	1	14.9889	15.6584	14.791	16.3444	15.8934	16.2498	10.9107	15.4893	15.5763	13.8665	12.8205	12.3803	16.1728	15.4489	16.5171	14.1871	14.1596	14.1879	15.9966	16.0478	16.2853	14.5674	15.0674	14.6382
233	KELK	4	517.335	1	NaN	NaN	NaN	NaN	7.76034	7.94533	NaN	7.44618	NaN	7.85909	NaN	8.10389	NaN	NaN	NaN	NaN	NaN	NaN	NaN	NaN	NaN	8.16362	7.68608	7.73352
234	VTDVS	5	520.261	1	10.045	10.3261	9.79711	10.2717	9.50205	9.82324	NaN	NaN	10.2472	7.55929	7.71954	7.70414	NaN	11.1906	10.431	9.04716	NaN	8.9279	10.1038	10.3678	11.1104	9.53072	9.06933	NaN
235	TSLVT	5	520.298	1	10.1242	10.9595	10.0725	10.8618	11.33	11.2871	NaN	NaN	10.515	8.15062	NaN	NaN	NaN	NaN	10.0717	8.5433	9.92838	NaN	NaN	10.8228	10.3351	9.30681	10.1267	9.62866
236	LLFK	4	520.351	1	9.85687	9.36255	9.79399	NaN	10.0626	NaN	NaN	NaN	NaN	NaN	NaN	NaN	NaN	9.11466	8.08135	8.22861	NaN	NaN	NaN	10.2052	NaN	8.97688	9.60087	9.40417
237	TLNSS	5	521.259	1	NaN	8.40804	NaN	NaN	NaN	NaN	NaN	NaN	9.0832	NaN	NaN	7.60487	NaN	NaN	NaN	8.29584	NaN	NaN	8.66173	8.9937	9.03879	8.13363	7.6729	NaN
238	PYGGK	5	521.272	1	NaN	NaN	NaN	NaN	8.59788	9.39046	NaN	NaN	NaN	NaN	NaN	NaN	NaN	NaN	NaN	NaN	NaN	NaN	NaN	NaN	NaN	NaN	8.56594	NaN
239	YVLK	4	522.33	1	8.20023	9.48641	6.87721	13.59	14.0754	13.8185	7.45051	13.2542	NaN	10.3598	NaN	NaN	12.7413	7.43055	10.7759	11.9516	11.3501	12.2943	NaN	NaN	NaN	NaN	13.1404	13.3323
240	VLYK	4	522.329	1	NaN	NaN	NaN	7.61859	7.66293	8.12661	NaN	6.46947	NaN	NaN	NaN	NaN	6.86622	NaN	NaN	NaN	NaN	NaN	NaN	NaN	NaN	NaN	6.49896	NaN
241	VGFGGS	6	523.253	1	NaN	NaN	NaN	NaN	NaN	10.2002	NaN	NaN	NaN	NaN	NaN	9.78314	NaN	NaN	9.37775	9.44389	NaN	NaN	NaN	NaN	NaN	NaN	9.95272	9.54134
242	FADDG	5	524.201	1	NaN	NaN	NaN	NaN	NaN	NaN	NaN	NaN	NaN	NaN	NaN	NaN	NaN	NaN	NaN	NaN	NaN	NaN	NaN	NaN	NaN	10.7454	10.2151	10.0586
243	TEFK	4	524.272	1	12.4348	12.3192	11.7753	16.3902	16.4661	16.4676	10.9005	16.1588	10.7227	14.6652	NaN	NaN	14.9864	11.4991	NaN	14.6418	13.9489	14.748	NaN	12.2997	11.6146	12.3427	16.2728	10.2711
244	VPLVP	5	524.345	1	NaN	NaN	NaN	8.86354	8.9795	NaN	NaN	NaN	NaN	NaN	NaN	NaN	NaN	7.92802	NaN	NaN	NaN	NaN	NaN	NaN	NaN	7.29876	6.99544	6.9826
245	LALPL	5	526.36	1	11.8991	12.0395	11.7735	11.1343	11.4341	11.4534	NaN	9.23632	10.1545	8.64386	9.55997	NaN	9.67498	12.2702	10.7812	11.0571	11.4084	11.3195	12.059	12.2364	12.0297	10.1777	10.8547	9.46637
246	VVLVP	5	526.358	1	NaN	NaN	9.56566	NaN	8.4476	8.61365	NaN	7.48064	8.45621	NaN	8.92422	NaN	NaN	9.41748	NaN	9.05184	9.91972	NaN	9.40251	NaN	NaN	8.6693	8.2441	NaN
247	GSGPLP	6	527.283	1	NaN	NaN	NaN	NaN	NaN	NaN	NaN	8.83028	8.92817	NaN	9.61717	NaN	NaN	8.53274	9.3797	NaN	NaN	NaN	NaN	9.37655	NaN	9.3374	8.94451	NaN
248	VAGGPQ	6	528.278	1	NaN	7.71413	NaN	NaN	8.0604	8.03748	NaN	NaN	7.43801	7.46619	7.62904	7.85446	NaN	NaN	NaN	7.67536	NaN	NaN	8.21181	8.06064	7.77049	7.37621	7.36589	NaN
249	TVLPV	5	528.339	1	9.51793	NaN	9.16679	NaN	NaN	NaN	NaN	NaN	NaN	NaN	NaN	NaN	NaN	NaN	NaN	NaN	10.341	NaN	NaN	9.57827	NaN	NaN	10.0777	NaN
250	FSEF	4	529.23	1	11.7021	12.3249	11.6093	13.4346	13.6277	13.6052	NaN	13.1401	13.7384	13.3822	13.6132	13.8815	10.0979	11.6005	11.1514	13.6488	13.1354	13.9021	14.0411	13.1616	12.6843	13.4437	13.3717	13.2264
251	GPLEN	5	529.263	1	NaN	NaN	NaN	NaN	NaN	NaN	NaN	10.3747	10.226	12.7407	12.483	13.526	NaN	NaN	NaN	12.3771	12.3855	12.6362	NaN	NaN	NaN	13.1179	12.3377	12.0163
252	VLLGGA	6	529.334	1	NaN	NaN	9.00574	10.4634	10.5898	NaN	NaN	10.8778	9.00525	10.9452	NaN	10.4765	10.1057	NaN	NaN	NaN	9.55431	9.80717	NaN	9.82685	NaN	9.70336	9.69934	10.0316
253	VGVQK	5	530.331	1	13.1358	12.1827	11.9626	14.0667	13.122	12.3875	8.54222	11.6206	9.48651	11.8914	NaN	NaN	14.4498	12.418	13.3253	11.7956	11.0041	10.7463	NaN	13.2584	11.267	10.6876	12.2384	11.2465
254	LLTLA	5	530.355	1	NaN	NaN	NaN	9.89547	9.78433	9.79423	NaN	9.52934	NaN	9.62017	NaN	9.15039	NaN	NaN	NaN	8.7621	NaN	8.77435	NaN	NaN	9.52657	NaN	8.80965	8.7106
255	LLLTA	5	530.354	1	NaN	9.64589	NaN	10.8257	10.3233	10.9401	NaN	11.4116	9.58571	9.0014	NaN	NaN	11.7076	NaN	11.1049	NaN	NaN	NaN	NaN	NaN	10.1733	NaN	9.30439	NaN
256	LNLDG	5	531.278	1	15.8628	16.2016	15.1435	16.6763	16.7205	16.4759	11.4055	16.248	NaN	16.9379	16.8417	17.0756	16.2098	15.7745	16.2376	16.7065	16.5179	16.7937	17.3073	16.8388	16.7203	16.4921	16.2575	16.01
257	VSTAGP	6	531.27722000000006	1	NaN	NaN	NaN	NaN	NaN	NaN	NaN	NaN	NaN	NaN	NaN	NaN	NaN	NaN	NaN	NaN	NaN	NaN	NaN	NaN	NaN	11.0105	11.1515	NaN
258	AAGSLN	6	532.273	1	NaN	NaN	NaN	NaN	NaN	NaN	NaN	NaN	NaN	NaN	NaN	NaN	NaN	NaN	NaN	NaN	NaN	NaN	NaN	NaN	NaN	9.05206	8.59198	7.70011
259	WVDL	4	532.276	1	16.9204	17.0351	16.5357	16.4986	16.8871	17.1405	11.6804	15.3557	16.6194	15.602	15.8724	16.3485	15.271	17.5923	16.0998	16.6933	17.0229	17.0074	16.6078	17.6032	16.572	16.9685	16.6065	16.5577
260	LATDL	5	532.298	1	NaN	NaN	NaN	NaN	NaN	NaN	NaN	NaN	NaN	NaN	NaN	NaN	NaN	NaN	NaN	NaN	NaN	NaN	NaN	NaN	NaN	10.6072	9.78789	9.58653
261	VGGTEA	6	533.257	1	10.8952	10.3229	NaN	9.48669	9.38648	NaN	NaN	8.28591	NaN	9.24186	12.1685	11.4831	NaN	10.8786	9.1954	9.72553	9.50935	9.91329	11.2604	9.85656	9.05776	11.0782	9.29539	9.16335
262	DTAVK	5	533.293	1	NaN	NaN	NaN	NaN	NaN	NaN	NaN	NaN	NaN	NaN	NaN	NaN	NaN	NaN	NaN	NaN	NaN	NaN	NaN	NaN	NaN	NaN	9.51159	9.34073
263	NNLSS	5	534.252	1	11.2684	11.9056	10.5904	12.459	12.2318	11.9958	NaN	12.5859	12.0177	11.937	11.4517	11.4055	11.8899	11.0991	11.7308	11.4702	11.3774	11.4694	12.857	NaN	12.348	11.5949	11.4776	11.3721
264	EWLS	4	534.256	1	NaN	12.477	11.7631	11.8143	NaN	11.7171	NaN	11.7613	12.5409	12.6098	12.1428	12.0486	11.042	11.8112	12.0782	NaN	NaN	12.6826	13.2944	12.8991	12.6272	11.437	10.9793	10.4987
265	LAMLA	5	534.296	1	NaN	NaN	NaN	NaN	12.1139	NaN	NaN	12.1019	NaN	NaN	NaN	NaN	11.2852	12.0423	11.9908	NaN	NaN	9.06965	12.3888	11.6442	11.7256	NaN	9.36953	10.9053
266	VGFLV	5	534.328	1	9.3339	9.71543	8.90675	10.4345	9.86352	10.5879	NaN	9.69373	9.7119	8.87056	NaN	NaN	11.1398	NaN	11.0315	NaN	7.62634	NaN	9.10644	10.1557	10.1785	NaN	8.36705	8.22466
267	FLGAGA	6	535.288	1	9.20924	9.30244	NaN	9.01282	NaN	9.70763	NaN	NaN	9.67324	9.71792	NaN	10.2561	NaN	NaN	NaN	9.99699	NaN	NaN	NaN	NaN	NaN	9.48859	9.44512	NaN
268	SEDW	4	536.201	1	11.5755	12.1818	11.3894	11.3997	10.9326	11.721	NaN	11.3406	10.9203	NaN	NaN	NaN	12.0351	11.7727	12.0918	NaN	NaN	NaN	11.1653	11.2626	11.5025	NaN	10.537	10.7079
269	SMLAD	5	536.24	1	16.1758	16.5678	15.4004	16.2321	16.315	16.0253	11.3145	15.6025	16.5431	16.0738	16.2096	16.7442	16.4455	14.5841	15.7913	15.0258	14.2924	14.572	16.4376	16.6962	15.6005	16.8489	15.6968	15.3235
270	GFGGAGA	7	536.248	1	11.1295	NaN	NaN	9.26651	NaN	9.97432	NaN	NaN	9.41511	NaN	9.16173	9.02234	NaN	10.6137	8.61051	9.42197	11.2582	10.2908	NaN	11.1383	9.96104	9.32582	8.91494	8.66907
271	TLTDS	5	536.257	1	12.268	12.5726	11.6496	10.6045	11.1019	NaN	NaN	10.0496	10.5617	11.639	11.6932	12.245	10.2367	11.1061	9.97977	12.2021	12.1967	12.2287	13.1768	12.764	12.3085	11.1904	11.1132	11.0636
272	LFQE	4	536.272	1	NaN	NaN	10.7546	NaN	NaN	NaN	NaN	NaN	NaN	11.2085	NaN	NaN	NaN	NaN	NaN	NaN	NaN	NaN	NaN	NaN	NaN	12.0569	10.6517	NaN
273	FLSLG	5	536.307	1	NaN	NaN	NaN	NaN	NaN	NaN	NaN	NaN	9.31996	NaN	8.30543	NaN	NaN	NaN	NaN	NaN	NaN	NaN	NaN	NaN	NaN	10.0064	9.66909	NaN
274	LLYK	4	536.345	1	NaN	NaN	NaN	8.24623	8.53457	8.51946	NaN	7.1748	NaN	NaN	NaN	NaN	8.05974	NaN	NaN	NaN	NaN	NaN	NaN	NaN	NaN	NaN	7.16318	7.33572
275	YLLK	4	536.345	1	NaN	NaN	NaN	NaN	NaN	7.78683	NaN	7.25029	NaN	NaN	NaN	NaN	NaN	NaN	NaN	NaN	NaN	NaN	NaN	NaN	NaN	NaN	7.54095	7.58885
276	FASDV	5	538.252	1	10.3496	10.6789	NaN	11.6599	11.4047	11.3631	NaN	10.8862	11.047	11.0669	NaN	11.1701	10.1713	10.2035	10.4844	10.5697	10.5777	11.0647	NaN	NaN	10.7508	NaN	12.0747	12.1084
277	GYDLA	5	538.252	1	NaN	NaN	NaN	14.4932	14.3981	14.6103	9.36907	13.5974	14.111	NaN	NaN	NaN	NaN	NaN	NaN	13.0655	NaN	NaN	NaN	NaN	NaN	NaN	13.4558	13.2962
278	ETYK	4	540.268	1	NaN	NaN	NaN	NaN	9.23625	8.94152	NaN	NaN	NaN	NaN	NaN	NaN	NaN	NaN	NaN	NaN	NaN	NaN	NaN	NaN	NaN	NaN	8.97518	8.99839
279	TSLYG	5	540.267	1	NaN	NaN	NaN	NaN	NaN	NaN	NaN	NaN	NaN	15.6756	14.9501	10.4219	NaN	NaN	NaN	14.8038	NaN	NaN	NaN	NaN	NaN	15.6104	14.8484	NaN
280	TVYGT	5	540.267	1	NaN	NaN	NaN	NaN	NaN	NaN	NaN	NaN	NaN	NaN	NaN	NaN	NaN	NaN	NaN	NaN	NaN	NaN	NaN	NaN	NaN	NaN	14.8484	14.5904
281	VLLPV	5	540.375	1	NaN	11.2018	10.3616	12.013	NaN	12.2199	7.04657	NaN	11.9055	10.2382	11.0941	11.1372	NaN	11.5639	9.53551	11.5059	11.9272	11.8814	12.0266	11.6718	11.6223	11.8152	8.7736	11.0338
282	ALLPQ	5	541.337	1	NaN	NaN	8.15702	8.69392	NaN	NaN	NaN	NaN	NaN	8.33835	8.58831	NaN	NaN	9.14428	NaN	NaN	8.48464	NaN	NaN	NaN	NaN	NaN	7.57124	7.17558
283	GVLPR	5	541.347	1	14.2148	14.1766	13.9033	NaN	NaN	14.6502	NaN	NaN	NaN	13.6677	14.0117	NaN	NaN	14.4116	13.8774	14.3504	14.3195	14.6206	14.4963	NaN	13.663	14.0685	13.8658	13.705
284	RLPR	4	541.347	1	NaN	NaN	NaN	NaN	NaN	NaN	8.73938	NaN	13.7998	NaN	NaN	NaN	NaN	NaN	NaN	NaN	NaN	NaN	NaN	NaN	NaN	NaN	13.8658	NaN
285	LSLPL	5	542.355	1	NaN	NaN	NaN	NaN	NaN	NaN	NaN	NaN	NaN	NaN	NaN	NaN	NaN	NaN	NaN	NaN	NaN	NaN	NaN	NaN	NaN	10.7251	10.027	9.86501
286	KGLPK	5	542.366	1	NaN	NaN	NaN	7.99238	7.97399	7.65539	NaN	6.93241	NaN	7.0305	7.05502	6.89918	NaN	NaN	NaN	6.75465	NaN	6.90866	7.12888	6.88017	NaN	NaN	6.71417	6.93797
287	FTEF	4	543.246	1	9.89065	NaN	9.40623	12.0599	12.2377	NaN	6.91594	12.0238	12.1762	NaN	13.3087	NaN	NaN	9.85274	9.93924	12.0832	11.2452	12.0647	NaN	NaN	11.2831	12.2854	11.8473	11.6454
288	LPTVD	5	544.298	1	14.6799	13.7543	14.1896	11.8946	10.7528	10.7779	NaN	NaN	12.6359	NaN	12.7942	13.1111	NaN	16.6481	14.5216	11.5475	11.5732	11.1377	14.5729	13.7829	13.9121	12.7368	10.4936	9.86005
289	HLFE	4	545.273	1	16.0555	16.5988	15.5589	18.1253	18.1216	18.0225	13.1881	18.0843	18.1955	17.275	16.812	17.2058	16.2321	15.7805	16.7112	17.0063	16.2124	16.7376	17.4767	17.1704	17.1446	18.2206	17.8961	17.5848
290	ALLDN	5	545.294	1	15.2874	15.6805	14.973	14.5818	15.0713	15.2259	9.74131	13.5936	14.5486	15.0958	15.7523	15.7794	14.3359	15.2057	14.5101	15.9086	15.5805	16.1711	16.1647	16.2512	15.2349	15.1804	15.0039	14.831
291	LVGGAE	6	545.293	1	NaN	NaN	NaN	11.5693	11.8287	11.72	NaN	11.387	10.8863	NaN	NaN	NaN	NaN	NaN	NaN	9.47797	9.56039	9.7023	NaN	NaN	NaN	10.891	10.0322	9.95319
292	AVLDK	5	545.329	1	15.1204	15.337	14.629	14.456	14.7433	15.0107	9.27365	13.8919	14.6262	13.726	13.6143	13.7859	15.0895	15.6991	15.8548	14.3111	14.1999	14.2382	14.8611	15.9609	15.5092	14.9444	14.2466	14.0038
293	QTLLA	5	545.33	1	15.5693	16.1065	15.2985	15.6703	16.4164	16.6241	10.9532	NaN	15.8182	NaN	15.8709	15.8714	NaN	13.0561	NaN	NaN	NaN	15.9496	16.582	16.6442	14.5256	15.846	15.865	15.7595
294	QNWV	4	546.268	1	12.3717	12.7507	NaN	14.0484	NaN	13.9554	8.90382	13.9633	NaN	NaN	NaN	NaN	14.7266	NaN	NaN	11.3555	11.8701	12.468	NaN	NaN	13.5383	NaN	11.8065	12.06
295	TLVDV	5	546.312	1	NaN	NaN	NaN	NaN	NaN	NaN	NaN	NaN	NaN	NaN	NaN	NaN	NaN	NaN	NaN	NaN	NaN	NaN	NaN	NaN	NaN	9.78413	7.55011	NaN
296	NDDW	4	549.195	1	11.8102	11.2628	11.177	10.7488	11.3302	11.2097	6.75535	NaN	10.6264	10.4773	10.5743	10.6996	10.4191	11.8259	10.9734	10.7345	10.2565	10.8816	10.5138	11.4156	NaN	11.4969	10.9281	11.0345
297	SGGLES	6	549.253	1	12.7579	12.0198	12.2987	10.4274	10.4556	10.8195	7.00975	8.3728	10.6106	8.51052	10.2705	10.0016	12.8423	13.6766	13.2047	10.4577	10.3581	9.89048	10.6468	11.852	10.7693	10.8558	9.75309	9.8424
298	WGSTV	5	549.268	1	11.0401	11.508	10.5602	11.6135	NaN	NaN	NaN	NaN	14.2633	NaN	11.1821	11.1051	12.3013	12.8936	14.0711	10.1747	NaN	NaN	13.7838	13.7906	13.8516	13.6763	8.31704	NaN
299	TSLQT	5	549.289	1	NaN	NaN	NaN	NaN	NaN	NaN	NaN	NaN	NaN	NaN	NaN	NaN	11.3112	10.5301	NaN	NaN	NaN	8.99188	NaN	NaN	12.3586	10.3645	10.4896	NaN
300	VAVGFG	6	549.304	1	NaN	NaN	NaN	8.8331	9.73452	9.68718	NaN	9.17495	NaN	NaN	7.96896	NaN	NaN	NaN	NaN	NaN	NaN	NaN	NaN	NaN	NaN	NaN	9.39713	8.88088
301	VLGFGG	6	549.303	1	NaN	NaN	NaN	NaN	NaN	NaN	NaN	NaN	NaN	NaN	NaN	8.20411	NaN	NaN	NaN	NaN	NaN	NaN	NaN	NaN	NaN	10.2746	9.40471	NaN
302	NFVGGG	6	550.265	1	NaN	NaN	12.26	11.5641	NaN	11.6833	NaN	NaN	NaN	NaN	11.2965	11.7957	NaN	NaN	NaN	12.9878	12.69	12.2879	NaN	NaN	NaN	11.7456	11.4448	11.4869
303	FLSLA	5	550.323	1	NaN	NaN	NaN	NaN	11.8732	11.7454	NaN	NaN	11.9198	10.8367	NaN	NaN	NaN	NaN	NaN	11.3016	NaN	NaN	NaN	NaN	NaN	NaN	11.5259	10.8718
304	WFAK	4	551.299	1	NaN	NaN	NaN	10.4534	10.8398	10.4466	NaN	9.99235	NaN	NaN	NaN	NaN	8.49874	NaN	NaN	NaN	7.84115	8.61141	NaN	NaN	NaN	NaN	9.87999	NaN
305	SMLAD	5	552.235	1	12.2291	11.9193	10.9373	13.6139	13.0483	13.0892	8.39859	12.4099	13.1136	12.4639	11.5008	13.1453	11.4565	11.9546	12.554	11.673	NaN	11.0697	12.944	13.2885	10.7848	14.0218	12.314	12.552
306	MGFPT	5	552.249	1	10.395	10.732	9.69357	NaN	10.1951	10.4695	NaN	NaN	10.2666	10.4808	12.2422	11.1589	NaN	10.6237	9.39614	11.428	12.6006	NaN	12.0944	11.7842	11.2049	10.759	9.74384	9.52363
307	VTEFG	5	552.267	1	10.1987	10.7763	NaN	10.2789	10.2293	NaN	NaN	9.48941	9.89702	7.94926	8.65383	8.69653	NaN	10.3248	10.8894	8.99587	8.93149	8.76798	10.1736	10.6361	10.141	9.8503	9.38267	NaN
308	DYVR	4	552.278	1	NaN	NaN	NaN	NaN	9.28913	9.17471	NaN	8.92016	NaN	NaN	NaN	NaN	9.32121	NaN	NaN	NaN	7.09632	8.8105	NaN	NaN	NaN	NaN	8.23123	9.1131
309	VLTYG	5	552.303	1	NaN	NaN	NaN	9.44261	8.63387	NaN	NaN	7.82494	10.4059	8.81138	9.6565	10.4905	NaN	NaN	NaN	NaN	NaN	NaN	NaN	NaN	NaN	NaN	8.41421	NaN
310	VYVSS	5	554.283	1	NaN	NaN	NaN	9.05516	8.67144	8.98189	NaN	8.46784	8.60377	NaN	NaN	NaN	8.62727	8.26077	9.59306	7.82182	NaN	7.49798	NaN	NaN	8.62284	8.82415	8.47909	NaN
311	LLAHT	5	554.329	1	NaN	9.32838	NaN	NaN	9.95604	9.93241	NaN	NaN	NaN	NaN	NaN	NaN	NaN	9.22888	NaN	NaN	9.77067	NaN	10.0959	9.89373	NaN	NaN	9.41612	8.98821
312	LLLPV	5	554.392	1	10.577	10.9236	10.567	11.6051	11.8044	11.8798	NaN	10.1383	11.5706	10.0264	9.13117	9.40471	8.04186	11.0254	8.38739	9.22335	11.4991	11.4035	11.6719	11.1766	11.1958	11.5822	11.1914	10.8604
313	VLLPL	5	554.39	1	8.54668	NaN	8.54754	NaN	NaN	8.04115	NaN	NaN	7.54571	NaN	NaN	NaN	7.33418	8.5975	7.19486	NaN	9.06199	8.2542	8.723	9.05927	8.82263	7.42318	6.97746	NaN
314	FTNSS	5	555.242	1	NaN	NaN	NaN	8.23129	8.31931	8.24748	NaN	NaN	8.24819	7.92448	NaN	NaN	NaN	NaN	NaN	7.85072	NaN	NaN	8.2188	NaN	NaN	7.92795	7.87947	NaN
315	LLLTP	5	556.371	1	NaN	NaN	NaN	11.751	NaN	NaN	NaN	NaN	10.8963	NaN	NaN	NaN	NaN	NaN	NaN	NaN	NaN	NaN	NaN	NaN	NaN	12.3171	11.7418	11.3941
316	LLLPT	5	556.371	1	NaN	NaN	NaN	11.751	12.1367	11.3418	NaN	10.8562	10.8963	9.51007	10.2333	10.4284	NaN	NaN	NaN	11.0392	11.0805	10.977	NaN	NaN	NaN	12.3171	11.7418	11.3941
317	GHSLGS	6	557.27	1	9.74407	10.1373	NaN	NaN	NaN	6.75229	NaN	NaN	NaN	NaN	10.1674	9.71076	NaN	9.29129	8.32854	NaN	9.82767	8.99738	11.4478	10.6289	9.73036	8.8355	6.89986	NaN
318	LTLPN	5	557.328	1	13.8471	NaN	13.3829	NaN	NaN	NaN	NaN	NaN	NaN	NaN	12.3829	11.9143	10.6453	13.5244	NaN	11.9067	13.0167	12.3653	NaN	NaN	NaN	12.1031	11.1729	NaN
319	VTGEGP	6	559.273	1	NaN	NaN	NaN	9.25292	8.67482	NaN	NaN	NaN	8.4636	NaN	7.1581	8.74716	NaN	NaN	NaN	NaN	NaN	NaN	NaN	NaN	NaN	9.32003	8.83249	8.74893
320	QNAGVA	6	559.28510000000006	1	NaN	NaN	NaN	NaN	NaN	NaN	NaN	NaN	NaN	NaN	NaN	NaN	NaN	NaN	NaN	NaN	NaN	NaN	NaN	NaN	NaN	10.8484	10.2092	9.92989
321	NQGLK	5	559.321	1	12.3702	11.8334	12.0183	10.2535	9.51617	9.41978	NaN	7.92883	11.1491	9.02435	10.5605	10.9208	11.1933	13.299	11.7709	9.31784	10.0508	8.94911	12.6767	12.4632	12.2512	10.745	8.35491	7.97387
322	QLGDK	5	560.304	1	NaN	12.1858	11.6706	12.3986	12.4174	12.3924	NaN	11.9897	12.3069	12.4519	12.552	12.6928	11.5516	12.101	12.0977	12.141	NaN	12.1555	12.7071	12.5185	11.9884	12.6583	12.2874	12.1192
323	FALPL	5	560.345	1	9.2193	9.75144	9.15016	8.70538	8.7015	NaN	NaN	7.71817	8.92476	NaN	NaN	NaN	NaN	8.99195	8.40002	8.3693	9.11752	NaN	10.0454	9.94676	9.9742	NaN	8.19459	NaN
324	FLLPA	5	560.344	1	11.7261	NaN	NaN	14.2425	14.6137	14.3387	NaN	13.7679	14.3455	14.0863	14.2306	14.3792	11.3624	NaN	11.6065	14.384	13.7958	14.876	13.9016	NaN	12.8208	14.137	14.491	14.3398
325	FALLP	5	560.345	1	9.2193	NaN	NaN	NaN	8.7015	8.95596	NaN	NaN	NaN	NaN	8.00007	NaN	NaN	8.99195	NaN	NaN	9.11752	NaN	NaN	NaN	NaN	9.03241	8.19459	NaN
326	VVGGTE	6	561.288	1	9.96357	9.89196	9.62645	9.51175	9.84459	9.53789	NaN	8.95921	9.81055	11.394	11.9934	12.3852	7.93863	9.53791	NaN	11.0516	10.1529	10.7221	10.8778	10.1539	9.21264	10.6728	10.0148	9.7845
327	DLGVAS	6	561.29	1	NaN	NaN	NaN	NaN	11.6562	11.421	NaN	11.0046	NaN	9.85666	NaN	NaN	NaN	NaN	NaN	NaN	NaN	NaN	NaN	NaN	NaN	NaN	10.7583	NaN
328	KSLVD	5	561.324	1	NaN	NaN	NaN	9.05125	NaN	8.87819	NaN	7.5828	NaN	9.02878	NaN	9.87253	NaN	NaN	NaN	NaN	NaN	9.74901	NaN	NaN	NaN	9.12198	8.74729	8.50597
329	SLTDK	5	563.305	1	11.9933	12.5193	11.3604	12.1764	12.3921	12.2405	NaN	11.8898	12.0974	12.5898	12.8742	12.7858	11.8065	11.9302	12.0971	12.3707	11.9499	12.5299	13.1692	13.1718	12.686	12.2991	11.6366	11.5535
330	ELSDT	5	564.251	1	9.80202	9.66581	9.28149	10.0408	10.0257	10.0895	NaN	9.28545	9.63435	10.1635	10.0894	10.4829	9.2953	10.0065	9.96291	NaN	9.0875	9.73677	10.5652	10.6533	9.83207	10.1033	9.46342	9.50211
331	FLGGGN	6	564.278	1	NaN	NaN	NaN	12.6923	NaN	NaN	NaN	NaN	12.2148	NaN	NaN	NaN	NaN	NaN	NaN	NaN	12.2113	NaN	NaN	NaN	NaN	NaN	11.6791	11.6202
332	LTYPA	5	564.304	1	13.3317	13.4594	13.2109	NaN	13.7266	NaN	NaN	NaN	13.4751	NaN	14.2589	14.0977	NaN	NaN	NaN	NaN	NaN	NaN	NaN	14.2234	13.9931	13.1576	13.0807	NaN
333	LVVHP	5	564.353	1	14.0775	13.7736	13.5235	12.9685	12.6049	12.4065	8.16784	11.3062	13.7156	12.754	13.7555	13.9268	13.7363	14.2259	14.1845	12.2097	11.9994	11.7553	14.8234	15.0949	14.2723	13.78	11.7763	11.331
334	VSSDGT	6	565.247	1	10.1698	9.55955	9.32081	7.74791	8.22258	NaN	NaN	NaN	7.74759	7.4503	8.85622	8.77228	NaN	9.40682	8.42663	7.51818	NaN	7.4449	8.13925	8.72561	7.6337	9.03964	7.43593	7.65958
335	TYGPQ	5	565.263	1	9.85006	9.53764	NaN	8.38791	NaN	NaN	NaN	NaN	8.75945	9.27991	11.2178	11.0073	NaN	9.54133	9.15719	10.3402	10.346	10.1792	10.6574	9.90619	9.01084	9.31494	8.16339	NaN
336	VYVDA	5	566.283	1	NaN	NaN	9.17675	10.2181	11.069	11.1468	NaN	10.3541	10.7913	NaN	10.1841	9.86052	NaN	NaN	NaN	10.1351	9.67402	10.1457	10.1045	10.1758	9.78436	10.6169	10.4682	10.3289
337	FLSLS	5	566.319	1	NaN	NaN	NaN	11.4766	11.4012	11.0452	NaN	NaN	11.717	NaN	10.3501	11.5722	NaN	NaN	NaN	11.2321	NaN	10.9562	11.4004	NaN	10.5013	10.724	11.2667	NaN
338	GSSGPY	6	567.241	1	10.515	10.0993	9.81356	9.03879	9.37415	9.80179	NaN	8.67532	NaN	NaN	NaN	NaN	10.3133	11.0087	10.5542	9.89568	11.0572	10.5354	10.586	10.6235	9.79317	9.57951	9.09913	9.08115
339	QYEK	4	567.278	1	8.99317	8.7845	8.44509	8.23637	8.9024	8.66472	NaN	8.06129	11.9819	8.01985	7.39928	12.1977	8.15371	8.24486	11.4537	8.33568	7.71181	8.41014	11.9025	8.33868	7.45198	12.2938	12.0317	8.39897
340	LAMFS	5	568.28	1	NaN	NaN	NaN	11.5336	12.2292	13.2379	NaN	12.7428	9.8559	11.3286	NaN	NaN	NaN	NaN	NaN	10.5524	11.6927	11.5686	NaN	NaN	NaN	NaN	10.4969	10.5191
341	ALGGPGV	7	570.326	1	NaN	NaN	NaN	8.80911	NaN	8.49055	NaN	NaN	NaN	NaN	NaN	8.94418	NaN	NaN	NaN	NaN	8.65501	8.85996	NaN	NaN	NaN	9.30202	8.6477	NaN
342	VNGGPAG	7	571.284	1	NaN	NaN	NaN	NaN	NaN	NaN	NaN	7.53124	NaN	NaN	NaN	NaN	NaN	NaN	NaN	NaN	NaN	NaN	NaN	NaN	NaN	NaN	8.2957	8.30017
343	QLLPT	5	571.346	1	NaN	NaN	13.048	12.8166	13.1971	NaN	NaN	NaN	12.9365	12.0111	NaN	12.8663	11.2018	13.2228	NaN	13.3281	14.2073	13.917	13.6749	NaN	12.9508	NaN	12.8868	NaN
344	TNGPLA	6	572.305	1	16.3682	16.4477	15.9988	14.5952	14.505	14.6185	8.85025	12.9574	14.0957	13.955	14.6128	14.7582	15.2447	16.6548	16.0406	14.6406	15.4423	14.8859	16.3693	16.5241	16.1257	13.8987	13.0564	12.7434
345	LLPET	5	572.329	1	11.5494	11.7155	NaN	12.5563	12.1261	11.7797	NaN	NaN	12.0969	12.0746	12.3102	12.9464	NaN	NaN	NaN	NaN	NaN	11.4683	13.0582	12.8024	12.5898	12.5277	11.6907	11.1642
346	VLLDL	5	572.365	1	8.76563	9.30383	NaN	9.05848	9.29405	9.55364	NaN	8.06334	8.85098	NaN	NaN	8.10675	NaN	8.54118	NaN	7.42803	8.1938	7.70956	9.50999	9.80671	9.35483	8.92532	8.53624	8.457
347	LALEK	5	573.361	1	NaN	11.147	10.7767	10.5759	10.5792	10.9053	NaN	9.12553	10.3115	NaN	9.88029	10.1453	11.4667	11.8746	12.0026	NaN	NaN	9.50459	10.5758	11.7186	11.4604	10.9648	10.3319	NaN
348	VVGGEN	6	574.284	1	11.1082	10.2222	10.3453	8.12007	8.54416	8.79038	NaN	6.9288	8.52636	8.92003	9.67031	9.83495	9.81436	11.675	10.4938	9.89267	10.5302	10.1039	9.76112	10.4842	9.70924	9.00919	8.39203	8.16531
349	LLDLT	5	574.345	1	NaN	NaN	NaN	10.1588	9.69584	NaN	NaN	NaN	NaN	NaN	NaN	NaN	NaN	NaN	NaN	NaN	NaN	NaN	9.8563	NaN	10.0642	NaN	8.90942	NaN
350	VLLET	5	574.346	1	NaN	NaN	NaN	NaN	NaN	NaN	NaN	9.61128	NaN	8.3651	NaN	NaN	NaN	NaN	NaN	NaN	NaN	NaN	NaN	NaN	NaN	9.93943	8.92784	9.23199
351	FLVPV	5	574.359	1	NaN	NaN	NaN	NaN	NaN	NaN	NaN	NaN	NaN	NaN	NaN	NaN	NaN	NaN	NaN	NaN	NaN	NaN	NaN	NaN	NaN	10.2644	9.66522	9.54799
352	HTCGGT	6	575.225	1	NaN	NaN	NaN	NaN	NaN	NaN	NaN	NaN	NaN	9.57523	9.02822	7.85663	NaN	NaN	NaN	8.38618	NaN	8.94255	8.46972	NaN	NaN	7.04173	6.98969	NaN
353	SVSPAD	6	575.262	1	NaN	18.1349	NaN	NaN	17.4333	NaN	NaN	NaN	16.8857	NaN	NaN	NaN	NaN	NaN	NaN	NaN	NaN	16.9206	NaN	NaN	NaN	NaN	16.7856	16.8155
354	GNTWV	5	576.278	1	NaN	NaN	NaN	NaN	NaN	14.4828	NaN	NaN	NaN	NaN	NaN	NaN	13.7563	NaN	NaN	NaN	NaN	NaN	NaN	12.5404	NaN	NaN	12.9235	13.022
355	LFLLA	5	576.375	1	NaN	NaN	NaN	NaN	NaN	NaN	NaN	NaN	NaN	NaN	NaN	NaN	NaN	NaN	NaN	NaN	NaN	NaN	NaN	NaN	NaN	NaN	8.63245	8.4246
356	WAMLG	5	577.28	1	NaN	NaN	NaN	11.1814	11.6749	12.6595	NaN	12.0272	NaN	11.9621	9.98796	11.9156	NaN	NaN	NaN	11.5773	11.5099	11.822	NaN	NaN	NaN	11.8381	12.0153	11.832
357	STTTAP	6	577.284	1	11.7502	11.9921	11.5743	NaN	11.5442	11.4106	NaN	10.8817	11.2763	10.913	11.2401	10.9809	NaN	NaN	NaN	10.5855	10.4209	NaN	12.0432	12.2658	11.4404	11.6962	11.3679	10.981
358	YLGPK	5	577.335	1	16.383	16.57	15.7672	17.0494	17.1624	17.2177	11.4762	16.861	16.8274	16.6401	16.1625	16.3323	16.8274	16.1604	16.4332	16.429	15.7684	16.4563	16.6097	16.9409	16.2391	17.1713	16.8334	16.7655
359	NPNFS	5	578.258	1	11.8965	11.9673	11.399	11.1233	11.2879	12.5264	NaN	11.3947	11.1535	11.3544	10.3868	10.2029	12.7404	12.8449	13.3181	11.1859	11.8945	11.351	12.0764	12.9914	12.8404	11.4429	11.1529	11.3289
360	VAVGFS	6	579.314	1	NaN	NaN	NaN	NaN	10.1381	10.1499	NaN	9.42717	NaN	9.13024	NaN	NaN	NaN	NaN	NaN	8.54492	NaN	8.11802	NaN	NaN	NaN	NaN	9.59479	NaN
361	FLDW	4	580.277	1	10.6049	11.1316	10.445	10.9286	11.2173	11.7748	NaN	NaN	11.1964	9.06874	NaN	8.62459	NaN	11.1829	NaN	NaN	12.2286	12.1495	10.4054	11.1441	10.6898	9.89514	10.6417	10.6698
362	SLVDF	5	580.298	1	NaN	15.2946	NaN	14.9457	13.2012	15.0448	10.1324	15.0181	13.9569	NaN	NaN	NaN	16.7424	14.3101	16.7096	NaN	13.2073	12.5685	14.6427	13.9964	15.9579	12.1265	13.4531	13.2926
363	FLSLT	5	580.336	1	NaN	NaN	NaN	9.47407	9.00241	8.95971	NaN	7.72062	9.45708	NaN	NaN	7.60354	NaN	NaN	NaN	8.75399	8.68918	9.51329	NaN	7.41757	9.26241	NaN	8.75013	7.65094
364	AEHPQ	5	581.269	1	12.916	13.1269	12.3842	11.7561	NaN	11.8262	NaN	NaN	11.4613	12.7954	12.6591	8.85915	12.5295	12.7979	12.8033	12.7137	12.2068	12.6466	13.1743	13.0708	12.5241	11.8599	11.8002	11.377
365	AEHPGA	6	581.269	1	NaN	8.89989	NaN	NaN	NaN	NaN	NaN	11.2587	NaN	NaN	NaN	NaN	NaN	NaN	NaN	12.7137	12.2068	NaN	NaN	NaN	NaN	NaN	11.8002	NaN
366	TLNHP	5	581.305	1	12.5979	13.3331	12.27	11.2759	11.7702	11.0073	NaN	10.2654	11.5446	12.1608	12.4242	12.5319	11.331	11.7287	NaN	NaN	12.4065	12.1935	13.3614	13.1074	NaN	11.5957	10.5527	NaN
367	LYGTK	5	581.33	1	NaN	NaN	NaN	10.4807	11.2186	10.1501	NaN	10.0194	NaN	9.32217	NaN	NaN	10.1624	NaN	NaN	10.2061	9.67266	10.4633	NaN	NaN	NaN	NaN	9.79348	9.78376
368	FFGLV	5	582.328	1	NaN	NaN	NaN	NaN	NaN	NaN	NaN	NaN	NaN	NaN	NaN	NaN	NaN	NaN	NaN	NaN	NaN	NaN	NaN	NaN	NaN	9.84453	9.83347	9.76354
369	SFGDSA	6	583.238	1	NaN	NaN	NaN	NaN	NaN	NaN	NaN	NaN	NaN	NaN	NaN	NaN	NaN	NaN	NaN	NaN	NaN	NaN	NaN	NaN	NaN	13.2825	12.568	12.4405
370	FSQDS	5	583.236	1	NaN	NaN	NaN	NaN	NaN	9.63544	NaN	9.1217	NaN	NaN	NaN	NaN	NaN	NaN	NaN	9.39501	8.97893	9.52132	NaN	NaN	NaN	NaN	9.3172	9.21725
371	LAMFS	5	584.275	1	NaN	NaN	NaN	14.345	14.9128	14.3219	8.66405	14.8361	14.0696	12.2862	10.6293	11.8747	NaN	NaN	NaN	12.516	12.1543	12.5071	NaN	NaN	NaN	12.8186	12.6185	12.6262
372	LEEVP	5	586.308	1	9.43567	NaN	NaN	9.69715	NaN	NaN	NaN	NaN	NaN	NaN	NaN	NaN	7.41297	NaN	10.6163	NaN	9.68376	NaN	10.6869	10.4336	NaN	NaN	9.44726	NaN
373	KLASPA	6	586.358	1	10.3698	NaN	9.7691	NaN	NaN	NaN	NaN	NaN	NaN	NaN	NaN	NaN	10.9478	NaN	9.59626	NaN	8.70997	NaN	10.3046	NaN	NaN	NaN	8.43668	NaN
374	KLASAP	6	586.358	1	NaN	10.7694	NaN	NaN	NaN	8.54645	NaN	8.38972	NaN	NaN	8.88128	8.86503	NaN	NaN	NaN	8.74455	NaN	NaN	NaN	10.5595	NaN	9.08059	8.43668	NaN
375	LLLDL	5	586.38	1	8.98471	9.42108	8.79108	8.98994	9.29319	9.55726	NaN	8.10142	8.72845	6.68758	7.46109	7.92096	8.97856	9.17364	8.80603	7.5121	8.30264	7.77767	9.53881	10.1569	7.0841	8.8961	8.20008	8.24934
376	LVGAEV	6	587.341	1	15.45	15.9929	14.4235	15.0575	15.2152	15.208	9.86197	15.0622	14.5302	15.8011	15.7156	15.8221	16.1335	13.6217	16.0024	15.8634	15.8252	15.7605	16.9478	16.3678	16.2031	15.1069	14.9857	15.0005
377	NNVLK	5	587.351	1	NaN	NaN	8.48267	NaN	NaN	NaN	NaN	NaN	NaN	8.05884	8.24258	NaN	8.39065	9.87808	9.06767	8.43714	8.63469	8.90037	NaN	NaN	9.29792	9.21683	8.67531	NaN
378	NVLDK	5	588.335	1	9.1863	8.77693	NaN	8.94158	9.19035	NaN	NaN	NaN	10.3184	7.56936	8.88842	9.19304	NaN	10.4295	11.0818	8.96366	NaN	NaN	10.1467	10.8625	10.2401	10.3588	8.61545	8.39226
379	LDNLD	5	589.283	1	NaN	12.1029	11.4044	12.4415	13.4033	12.544	7.8712	NaN	12.6769	NaN	14.2628	14.7311	NaN	12.1133	10.7326	NaN	12.2331	13.4754	NaN	13.3712	12.0241	13.5847	13.2203	13.0522
380	DNLDL	5	589.283	1	NaN	NaN	NaN	NaN	NaN	NaN	NaN	8.21223	NaN	12.8703	NaN	12.6738	13.7324	NaN	NaN	NaN	NaN	14.0231	14.2049	14.3473	13.7042	NaN	12.9459	NaN
381	NSWPS	5	590.258	1	16.693	16.7797	16.4212	17.0944	17.1968	17.2228	11.9246	16.5397	16.829	16.8991	17.2437	17.1097	16.2729	16.5891	16.4808	17.0455	16.7254	17.0041	17.3202	16.8571	16.5387	16.9346	16.8026	16.6743
382	NLDTK	5	590.316	1	11.6426	11.4832	10.7783	11.2111	11.3699	11.362	NaN	11.155	NaN	11.3014	7.56936	8.45847	10.9554	NaN	11.3769	11.4816	10.78	11.5818	NaN	11.6924	11.0225	9.37519	10.8562	10.5607
383	LLFPT	5	590.354	1	NaN	NaN	NaN	NaN	NaN	NaN	NaN	NaN	NaN	NaN	NaN	NaN	11.3485	11.4914	11.031	6.73185	NaN	NaN	11.1792	10.9339	10.6506	12.9663	12.0027	11.4474
384	LTLSGT	6	591.337	1	10.7138	10.2392	9.77071	10.1963	10.5788	9.91219	NaN	9.35614	8.8492	10.6728	9.73358	10.5384	10.6889	9.08694	9.57691	9.568	8.62423	NaN	10.7085	10.9615	10.374	NaN	9.39566	NaN
385	ADMGGAA	7	592.241	1	NaN	NaN	8.96646	NaN	9.63411	9.42329	NaN	8.70207	NaN	9.2431	NaN	NaN	NaN	NaN	NaN	NaN	9.0211	8.99565	NaN	NaN	9.38137	9.21082	8.83703	NaN
386	APYNK	5	592.31	1	6.33237	NaN	NaN	8.80557	9.83781	10.2944	NaN	8.54365	NaN	NaN	NaN	NaN	6.66367	NaN	NaN	7.05441	NaN	7.62887	NaN	NaN	NaN	NaN	9.05941	9.28453
387	WAMLG	5	593.276	1	NaN	NaN	NaN	12.0276	12.2874	12.1785	NaN	NaN	12.4597	NaN	NaN	11.3663	NaN	NaN	NaN	NaN	NaN	11.4359	NaN	NaN	NaN	13.0103	12.6518	12.7793
388	LSSNSS	6	594.276	1	8.2537	8.32684	8.0617	7.64157	8.04173	7.69087	NaN	NaN	7.56618	NaN	NaN	NaN	7.51382	NaN	NaN	NaN	NaN	NaN	7.85532	8.22417	7.61248	NaN	7.37988	7.45876
389	YTALK	5	595.344	1	NaN	NaN	NaN	NaN	7.50152	8.35639	NaN	7.7735	NaN	7.28809	NaN	NaN	8.79527	NaN	NaN	NaN	NaN	NaN	NaN	NaN	NaN	NaN	7.17138	NaN
390	YKVSV	5	595.347	1	9.61507	10.5141	NaN	10.6635	10.9365	10.7206	NaN	10.4169	9.62667	NaN	NaN	NaN	9.77522	NaN	NaN	NaN	10.4142	10.5362	11.4298	10.5959	NaN	NaN	10.0501	10.2593
391	VHGALV	6	595.359	1	11.4661	12.0121	10.9275	9.79815	9.10744	NaN	NaN	NaN	9.20849	NaN	NaN	NaN	12.8923	12.7441	12.7621	NaN	9.32266	NaN	10.8099	11.8814	11.6784	NaN	7.81183	NaN
392	YLDW	4	596.271	1	11.8076	12.4452	11.6996	13.6992	13.7461	14.0334	8.73406	12.5176	13.4196	12.2814	11.9586	12.4062	11.3285	11.5799	12.0369	13.5323	13.9005	14.1268	13.8046	13.1964	13.3225	12.667	13.1164	12.8677
393	GHGAGGAA	8	597.275	1	8.07506	7.61234	7.60453	7.90973	NaN	NaN	NaN	7.45988	7.23714	7.51364	7.43769	NaN	7.89442	7.80062	7.52391	6.64258	NaN	NaN	7.16184	7.29875	NaN	8.20759	7.06263	7.13935
394	LAAEPV	6	599.342	1	NaN	NaN	NaN	9.33962	NaN	9.70962	NaN	NaN	NaN	NaN	NaN	NaN	NaN	NaN	NaN	NaN	NaN	NaN	10.6354	10.0469	9.98935	8.95702	8.34834	NaN
395	ALPLVS	6	599.376	1	13.5014	14.2986	NaN	13.3424	14.6461	14.6749	9.07182	14.7837	13.3989	14.1058	13.216	12.8824	14.5124	NaN	15.1182	13.5317	12.7506	13.3238	13.8461	14.305	11.4925	13.6048	13.7684	13.9502
396	LAYMS	5	600.268	1	NaN	NaN	NaN	10.8055	11.1852	10.1152	NaN	10.2752	8.63883	NaN	NaN	NaN	NaN	NaN	NaN	NaN	NaN	8.34102	NaN	NaN	NaN	NaN	8.99259	9.38497
397	FQYGS	5	601.263	1	12.5739	13.2026	12.4058	NaN	14.1561	14.3546	7.91194	13.298	11.4945	13.8413	12.271	12.1492	10.825	NaN	NaN	14.1811	NaN	14.8474	NaN	12.3067	NaN	12.3112	13.744	14.0992
398	LAPDW	5	601.299	1	11.6449	11.2767	11.3123	10.8941	9.84074	NaN	NaN	NaN	11.8033	NaN	9.54538	10.1406	9.21223	13.5016	10.9023	10.4664	11.1914	10.5144	13.1292	12.2662	12.5971	11.2202	NaN	8.13897
399	TLASPL	6	601.356	1	11.3366	11.602	10.6639	10.9675	11.0128	NaN	NaN	10.9404	NaN	NaN	NaN	11.6053	NaN	NaN	NaN	11.3877	11.024	11.2616	12.3538	12.0564	NaN	11.1851	10.591	10.4362
400	FLLPL	5	602.392	1	10.4295	10.7895	10.1075	10.3111	10.3939	9.82122	NaN	9.66452	9.6293	9.57196	9.42763	9.75304	10.5334	10.098	10.0408	9.73523	9.57421	NaN	10.7685	10.7539	10.7472	10.0244	9.68779	9.5157
401	WAVDL	5	603.313	1	NaN	NaN	NaN	NaN	NaN	NaN	NaN	NaN	NaN	7.43189	NaN	NaN	NaN	NaN	NaN	8.63096	NaN	NaN	NaN	10.1945	NaN	9.25911	8.82357	8.30555
402	TDGQLA	6	604.294	1	11.8639	NaN	11.8206	NaN	12.42	12.4425	8.02268	11.9267	13.4544	NaN	NaN	NaN	NaN	NaN	13.2716	NaN	NaN	NaN	13.7847	NaN	13.0618	NaN	11.8541	11.5667
403	TLEEL	5	604.319	1	15.3604	16.1885	15.1133	15.5813	15.7445	15.7191	10.7486	15.3611	15.5946	15.8377	15.6035	15.8321	15.5091	15.6745	15.5193	15.8352	15.5868	16.1137	16.5902	16.8396	16.2247	15.6451	15.6419	15.4695
404	LQLGSS	6	604.331	1	16.7694	16.8189	15.9226	16.4661	16.4947	15.6851	11.763	14.7533	16.2888	16.2841	17.2129	17.3982	16.9245	13.5841	15.5087	15.2588	14.5818	14.1505	17.3805	17.1554	15.0861	16.6094	15.9614	14.4648
405	FASAPL	6	605.33	1	NaN	NaN	NaN	NaN	NaN	10.1089	NaN	NaN	NaN	NaN	NaN	NaN	NaN	NaN	NaN	NaN	NaN	NaN	NaN	NaN	NaN	10.0998	9.92394	9.82005
406	WSGEK	5	606.288	1	14.5558	14.7626	14.1348	15.707	15.8858	15.8798	9.98761	14.9315	15.2915	14.2545	14.5724	14.5227	14.4397	14.7196	14.6528	14.505	14.3939	14.6159	15.1433	15.4364	14.7631	15.619	15.2342	15.0789
407	GDTWK	5	606.289	1	10.1916	9.96893	9.7409	11.1123	11.3718	11.5072	NaN	10.6549	NaN	11.4181	NaN	NaN	10.635	NaN	10.1389	11.542	11.0352	11.9264	NaN	NaN	9.78321	9.14443	11.333	11.075
408	FLGAGAA	7	606.325	1	10.6483	NaN	10.0767	NaN	11.5846	11.2736	NaN	NaN	11.2821	10.1575	9.04175	NaN	9.69877	NaN	10.2048	10.8347	10.504	10.8454	NaN	11.0487	10.5243	11.085	11.0325	10.7268
409	TLFGGL	6	607.344	1	NaN	NaN	NaN	NaN	NaN	NaN	NaN	NaN	NaN	NaN	NaN	NaN	NaN	NaN	NaN	NaN	NaN	NaN	NaN	NaN	NaN	NaN	8.18472	7.78948
410	AAGYDL	6	609.289	1	11.6523	11.7753	11.3745	11.7833	12.9362	12.9662	6.95875	12.1526	11.5415	12.7316	12.4897	12.3714	11.2947	NaN	11.5233	12.9257	12.4063	13.298	NaN	11.5526	NaN	12.3675	13.0325	12.8824
411	VVSGTM	6	609.292	1	NaN	NaN	NaN	NaN	NaN	NaN	NaN	NaN	NaN	NaN	NaN	NaN	NaN	NaN	NaN	NaN	NaN	NaN	NaN	NaN	NaN	7.55692	7.59866	7.5145
412	TSFVSA	6	611.305	1	NaN	13.7785	13.0524	NaN	13.8716	13.8723	NaN	13.8203	NaN	NaN	NaN	NaN	14.7563	NaN	NaN	NaN	12.0739	12.0917	NaN	12.2679	NaN	NaN	13.0577	NaN
413	LLATPP	6	611.376	1	NaN	8.97722	7.55888	13.7357	13.3024	10.1668	NaN	13.4945	13.6166	13.4983	NaN	13.4093	NaN	12.8348	13.2819	12.5614	11.8099	12.0385	NaN	9.59376	10.3529	NaN	13.4357	12.7568
414	LLTAPP	6	611.376	1	13.3601	NaN	NaN	10.5063	9.59028	13.2828	NaN	13.4945	NaN	NaN	12.6834	NaN	14.0563	12.8348	9.59323	NaN	NaN	12.0385	13.2979	13.7898	13.649	13.8618	9.09446	12.7568
415	MLADY	5	612.273	1	NaN	8.21256	NaN	9.48251	8.44274	9.24244	NaN	9.69502	NaN	NaN	NaN	NaN	NaN	NaN	9.67779	7.83111	NaN	NaN	NaN	NaN	NaN	NaN	8.37732	NaN
416	LYPYG	5	612.303	1	14.4262	14.7965	14.1963	14.3678	14.5888	14.4322	9.4029	13.3197	13.9751	14.7046	14.7378	14.4082	13.3987	13.6771	13.4471	14.6613	14.5496	14.765	15.0949	14.8563	13.955	14.4759	13.9594	13.7062
417	ALPLLS	6	613.392	1	12.071	13.4088	11.7783	13.2503	12.73	13.2913	7.79792	13.3051	13.2248	11.6555	10.8555	10.9799	13.7803	14.2778	15.5514	11.9931	10.8455	11.5269	13.3968	NaN	14.6418	13.1395	12.4791	12.1347
418	TLLGLP	6	613.392	1	NaN	NaN	9.95748	9.27956	10.314	NaN	NaN	9.52558	NaN	12.8916	13.8566	NaN	NaN	NaN	NaN	11.8856	11.154	NaN	11.6649	11.5796	10.1951	NaN	9.89413	10.2153
419	VLLGLV	6	613.428	1	12.9651	13.9956	12.4556	13.0657	12.1675	12.0792	6.9465	11.2216	12.757	10.829	10.9386	10.7996	15.0478	13.6154	15.5673	11.7852	11.6028	10.5499	13.5346	13.9005	14.0879	12.4226	10.8635	10.0667
420	SFSEF	5	616.261	1	16.5221	16.9177	15.8741	17.2286	17.1278	16.6451	12.0736	16.4871	17.0247	17.4338	17.2874	17.5978	16.3459	15.8485	16.4802	16.9693	16.1636	16.6023	17.5382	17.2368	16.5318	17.1189	16.5262	16.3026
421	WLGLGA	6	616.346	1	NaN	NaN	NaN	NaN	NaN	NaN	NaN	NaN	NaN	NaN	NaN	NaN	NaN	NaN	NaN	NaN	NaN	NaN	NaN	NaN	NaN	8.86788	8.46009	NaN
422	KVELK	5	616.403	1	NaN	NaN	NaN	8.17603	8.23675	8.45113	NaN	8.06283	NaN	8.14563	7.30409	8.29264	NaN	NaN	NaN	NaN	NaN	NaN	NaN	NaN	NaN	8.40213	7.97305	8.18704
423	VKELK	5	616.403	1	NaN	NaN	NaN	NaN	8.23675	NaN	NaN	NaN	6.66917	8.14563	7.30409	8.29264	NaN	NaN	NaN	NaN	NaN	NaN	NaN	NaN	NaN	NaN	7.97305	NaN
424	LDPSDA	6	617.279	1	13.5784	13.5837	12.9185	NaN	NaN	NaN	NaN	NaN	NaN	11.0702	13.6275	13.0013	11.9559	13.1199	12.6861	12.0154	13.0405	12.4488	14.8202	13.9938	13.6905	11.1668	9.93563	9.66714
425	FGLLPA	6	617.365	1	17.3852	17.9533	17.0583	17.9311	17.7312	17.1452	NaN	16.5891	17.0643	17.2895	18.1542	17.923	17.4794	16.3043	NaN	17.2651	17.2488	16.9713	18.1728	18.0586	17.2235	17.3989	16.646	16.0885
426	YGYES	5	618.242	1	9.7211	9.91563	9.42112	10.5109	11.0521	10.7024	NaN	10.2154	11.2287	11.4005	12.0838	12.0568	NaN	8.39413	9.01441	11.2068	11.4913	11.4501	NaN	10.9631	10.2599	11.273	10.5068	10.1988
427	LQLGST	6	618.346	1	NaN	NaN	NaN	NaN	9.29335	NaN	NaN	NaN	NaN	NaN	NaN	NaN	NaN	NaN	NaN	NaN	NaN	9.18418	NaN	NaN	NaN	9.9736	8.80828	NaN
428	WSVDL	5	619.30847000000006	1	NaN	NaN	NaN	NaN	NaN	NaN	NaN	NaN	NaN	NaN	NaN	NaN	NaN	NaN	NaN	NaN	NaN	NaN	NaN	NaN	NaN	9.1807	8.37696	8.19565
429	KFNPN	5	619.32	1	NaN	7.90345	NaN	8.27606	8.86896	NaN	NaN	NaN	NaN	10.2697	11.3367	10.5736	NaN	NaN	NaN	8.44171	NaN	9.12794	9.72734	8.60648	NaN	NaN	8.13756	8.49893
430	ASGGLES	7	620.29	1	13.5793	NaN	13.266	12.2293	12.1229	12.2749	8.28314	10.4022	12.6063	10.2483	12.0154	11.8717	13.6037	14.3685	13.5503	11.5816	11.7931	11.7127	12.6923	NaN	12.405	12.779	11.5889	11.4043
431	FLGALT	6	621.36	1	NaN	NaN	NaN	9.05861	NaN	8.41535	NaN	NaN	NaN	NaN	NaN	NaN	8.28728	9.79172	NaN	NaN	NaN	NaN	8.75067	8.71617	NaN	9.8318	9.23454	8.90725
432	TLLEF	5	622.344	1	9.39106	10.1671	9.08763	10.9977	10.2629	10.87	NaN	11.0672	10.0415	9.29055	7.63575	7.72548	10.8654	9.47474	10.7049	NaN	9.15525	9.09366	10.5143	10.2861	10.7261	9.57396	9.97071	NaN
433	LFGSLS	6	623.341	1	NaN	NaN	NaN	NaN	9.15702	9.56429	NaN	NaN	NaN	NaN	NaN	NaN	NaN	NaN	NaN	NaN	NaN	NaN	NaN	NaN	NaN	NaN	7.98334	NaN
434	GHGAGGAV	8	625.306	1	NaN	NaN	7.98526	NaN	NaN	7.45424	NaN	NaN	6.96037	NaN	NaN	NaN	NaN	NaN	8.40952	NaN	NaN	NaN	NaN	8.57522	7.15403	NaN	7.11381	NaN
435	YVSSDG	6	627.262	1	NaN	NaN	NaN	7.42859	7.8356	7.53691	NaN	NaN	7.89059	9.46317	10.8954	11.0067	NaN	NaN	NaN	9.10838	7.80465	8.6799	8.4821	NaN	NaN	9.8062	8.59474	8.14687
436	VLAEPV	6	627.37	1	NaN	9.55922	NaN	10.2723	10.2311	10.3786	NaN	9.03083	9.75202	9.3422	NaN	NaN	9.12744	10.0156	10.1584	9.45687	NaN	9.86699	10.8113	10.4805	10.4	9.82167	9.13287	8.96263
437	DTGLHS	6	629.289	1	13.8171	14.3204	13.3022	14.4042	14.8012	14.4348	8.49282	14.044	14.2013	14.6249	14.8761	14.9183	14.1547	13.2889	13.8519	14.334	13.3743	14.4019	14.9216	14.7197	11.3166	14.5109	14.283	14.1142
438	AVTGEGP	7	630.312	1	NaN	NaN	NaN	NaN	NaN	NaN	NaN	NaN	NaN	NaN	NaN	NaN	NaN	NaN	NaN	NaN	NaN	NaN	NaN	NaN	NaN	10.1875	9.43958	9.21838
439	VPGGTEA	7	630.312	1	NaN	NaN	NaN	NaN	NaN	10.1452	NaN	9.70747	NaN	NaN	NaN	NaN	NaN	NaN	NaN	9.91243	NaN	NaN	10.7336	NaN	NaN	NaN	9.8164	9.7644
440	TGPLEN	6	630.31	1	NaN	NaN	NaN	NaN	NaN	NaN	NaN	NaN	NaN	NaN	NaN	NaN	NaN	NaN	NaN	NaN	NaN	NaN	NaN	NaN	NaN	10.4011	9.4873	9.47694
441	AGALGDK	7	631.342	1	10.4877	NaN	NaN	NaN	10.8003	10.8015	NaN	10.4187	10.7165	10.8185	10.9776	11.0456	NaN	10.4708	10.511	NaN	NaN	10.5429	NaN	10.8754	10.3051	8.88097	10.7284	10.488
442	VWVDL	5	631.346	1	10.3314	10.1326	9.9841	NaN	9.42451	NaN	NaN	NaN	8.90089	NaN	9.24079	8.83538	NaN	10.5268	NaN	NaN	NaN	NaN	NaN	NaN	NaN	NaN	8.85732	8.76612
443	VVGGTEA	7	632.326	1	17.4842	17.6907	17.1265	17.8469	17.6695	17.7429	12.8053	17.3479	17.6339	18.0769	18.0288	18.2814	16.8817	17.3781	17.4304	17.7892	17.1897	17.5566	18.3597	18.1766	17.7609	17.7348	17.4815	17.1897
444	TGLLDN	6	632.326	1	NaN	NaN	NaN	NaN	NaN	NaN	NaN	NaN	NaN	8.26528	NaN	NaN	NaN	NaN	NaN	NaN	NaN	9.45556	NaN	NaN	NaN	8.88495	8.428	NaN
445	SWLNN	5	633.3	1	12.239	12.5829	12.0032	13.8576	14.1269	NaN	8.39651	NaN	NaN	NaN	NaN	NaN	11.7638	12.1468	NaN	NaN	NaN	NaN	14.4256	NaN	NaN	14.0898	13.6116	NaN
446	SSTEPL	6	633.311	1	14.8529	15.1455	14.5616	12.739	12.7238	13.2048	7.78624	11.6543	12.1037	11.8449	12.4306	12.3902	NaN	15.1679	15.163	12.8468	14.0563	12.5793	14.7513	15.2879	NaN	13.0085	12.5506	12.279
447	STSSPGV	7	634.305	1	10.8763	11.3103	NaN	NaN	NaN	11.2829	NaN	NaN	11.0531	10.8491	NaN	10.6795	NaN	NaN	NaN	10.0167	NaN	10.1924	NaN	11.9339	11.5816	NaN	11.2452	NaN
448	NVYAAP	6	634.321	1	NaN	NaN	NaN	NaN	NaN	NaN	NaN	NaN	NaN	NaN	NaN	NaN	NaN	NaN	NaN	10.9774	NaN	11.1362	NaN	NaN	11.7381	NaN	11.5875	NaN
449	YLGPKG	6	634.357	1	10.4403	10.3335	NaN	10.6525	10.4294	10.3881	NaN	10.6115	9.76185	10.7691	10.3411	10.3935	10.8919	NaN	NaN	10.6134	9.16357	10.3491	10.5545	10.5088	NaN	10.2452	9.82998	10.1174
450	TWNSQ	5	635.28	1	NaN	NaN	NaN	NaN	9.4727	NaN	NaN	NaN	NaN	NaN	NaN	9.62784	NaN	NaN	NaN	NaN	9.20163	NaN	NaN	9.5766	8.6598	NaN	8.89079	NaN
451	QFVGGQ	6	635.316	1	NaN	NaN	NaN	10.9287	10.8438	NaN	NaN	10.2421	10.0358	10.3004	NaN	NaN	NaN	NaN	NaN	9.66393	NaN	9.89427	NaN	NaN	NaN	10.3158	10.5825	10.252
452	LFQEV	5	635.34	1	17.6777	18.1365	17.2591	17.7937	17.9018	17.9426	12.4161	16.571	17.9264	16.2169	16.9622	17.3845	17.7754	18.226	18.0675	16.4866	16.8082	16.6145	18.2669	18.7942	18.1145	18.2071	17.1649	16.9364
453	SPFGGDG	7	636.264	1	NaN	NaN	NaN	9.22324	9.05433	9.33513	NaN	10.0702	9.52281	NaN	NaN	8.60115	9.12857	10.6004	9.2434	8.3639	NaN	NaN	NaN	NaN	NaN	9.66384	8.95498	8.86264
454	VSSDGTA	7	636.286	1	13.7095	13.8334	13.1332	12.0804	11.8509	11.674	7.08148	10.6353	11.3689	9.95724	9.99756	9.94042	13.6407	13.7475	13.2015	10.5598	9.84068	9.98128	11.5764	13.2156	12.2763	11.5761	10.7858	10.8221
455	MPLFE	5	636.309	1	NaN	NaN	NaN	NaN	NaN	NaN	NaN	NaN	NaN	NaN	NaN	NaN	NaN	NaN	NaN	8.26836	9.28712	NaN	NaN	NaN	NaN	NaN	8.33831	NaN
456	STLQTS	6	636.321	1	NaN	NaN	NaN	10.4717	10.498	10.6064	NaN	NaN	10.1271	NaN	NaN	NaN	NaN	NaN	NaN	NaN	NaN	NaN	NaN	NaN	10.294	NaN	9.53375	NaN
457	LFADDG	6	637.284	1	NaN	NaN	NaN	NaN	NaN	NaN	NaN	NaN	NaN	NaN	NaN	NaN	NaN	NaN	NaN	NaN	NaN	NaN	NaN	NaN	NaN	11.3531	10.6811	10.5952
458	DMVTR	5	637.299	1	NaN	NaN	NaN	9.396	9.20243	9.47071	NaN	9.83633	NaN	9.00796	NaN	NaN	10.383	NaN	NaN	NaN	NaN	9.17515	NaN	NaN	NaN	NaN	9.68403	9.77884
459	YSLEQ	5	639.301	1	NaN	NaN	NaN	10.3754	NaN	10.7542	NaN	10.0304	NaN	NaN	NaN	NaN	9.89072	NaN	10.7891	NaN	NaN	NaN	NaN	NaN	NaN	12.729	9.89695	NaN
460	VAVGFM	6	639.316	1	NaN	NaN	NaN	8.93422	9.63197	10.2292	NaN	9.89604	NaN	NaN	NaN	NaN	NaN	NaN	NaN	NaN	NaN	NaN	NaN	NaN	NaN	NaN	8.99273	10.0848
461	VTEYK	5	639.336	1	NaN	NaN	NaN	9.07447	9.06315	8.91389	NaN	8.84759	NaN	6.46238	NaN	NaN	NaN	NaN	NaN	NaN	NaN	NaN	NaN	NaN	NaN	NaN	8.63484	8.87127
462	VSAYLS	6	639.335	1	NaN	NaN	NaN	NaN	NaN	12.201	NaN	12.8879	NaN	11.5196	NaN	NaN	NaN	NaN	NaN	10.5738	12.326	13.2447	NaN	NaN	NaN	NaN	9.3898	12.6525
463	VVVGEH	6	639.349	1	10.6218	10.5067	10.241	8.06603	8.39863	8.00238	NaN	7.23586	8.61687	8.88678	9.5733	9.54659	8.23843	10.1478	8.77285	9.84956	10.5658	10.0584	10.0396	9.94692	9.16286	8.37925	7.50404	7.5274
464	DFMDL	5	640.265	1	9.91395	NaN	9.55093	10.5356	10.679	10.3214	NaN	9.75271	10.2772	10.3543	10.6636	10.953	10.7184	11.0698	11.3331	10.3778	9.77277	10.3092	NaN	11.2392	NaN	10.4555	10.0963	9.88689
465	TGYTQA	6	640.295	1	NaN	NaN	NaN	NaN	NaN	11.8023	NaN	11.3174	NaN	NaN	NaN	NaN	NaN	NaN	NaN	NaN	NaN	NaN	NaN	NaN	NaN	NaN	10.9266	11.323
466	YWGSK	5	640.31	1	10.1535	10.9068	9.46334	12.8798	13.2871	13.0332	NaN	12.5789	10.4259	12.4737	NaN	8.86903	11.1801	9.5459	10.7547	12.8199	11.9676	12.9128	8.9598	11.6097	10.8188	11.2882	12.5367	12.4991
467	TSLYGT	6	641.315	1	10.2473	10.3933	9.53578	9.18347	10.0694	10.5852	NaN	10.5717	10.1576	11.2561	10.8807	10.7584	NaN	NaN	10.4813	10.317	NaN	10.0093	9.9802	10.363	9.44936	10.6402	10.7188	10.3462
468	LLAEPV	6	641.388	1	9.60287	NaN	9.513	10.0329	10.2002	10.2383	NaN	8.72398	9.58667	9.06699	9.80333	10.1433	9.1513	10.7795	10.4024	9.48791	10.1697	9.9236	10.9357	10.7053	10.6732	9.66485	9.04603	NaN
469	FSFEL	5	642.313	1	NaN	8.13913	NaN	10.6572	9.06916	10.1569	NaN	10.2421	9.29747	7.13642	NaN	NaN	10.1146	7.24901	10.1041	8.35241	NaN	NaN	8.67568	7.95153	10.201	NaN	7.97536	NaN
470	LHAESS	6	643.306	1	NaN	NaN	NaN	7.94943	8.07805	7.79872	NaN	6.59259	6.92411	NaN	NaN	NaN	NaN	NaN	NaN	NaN	NaN	NaN	7.63508	7.5235	7.16603	7.22055	7.24766	6.97519
471	LQSPAK	6	643.377	1	NaN	9.52698	9.16416	9.23691	NaN	9.29219	NaN	NaN	NaN	9.05363	NaN	NaN	NaN	NaN	NaN	NaN	NaN	NaN	NaN	NaN	NaN	NaN	9.13685	9.20595
472	VVGGENA	7	645.321	1	11.3491	10.6222	NaN	NaN	9.24865	9.50474	NaN	NaN	8.70879	NaN	NaN	NaN	9.76538	11.8605	10.3135	NaN	NaN	9.88489	NaN	10.7581	9.66004	NaN	8.56189	8.23633
473	LWVDL	5	645.36	1	10.2597	NaN	10.0959	NaN	NaN	9.48698	NaN	NaN	8.73814	7.69428	NaN	NaN	NaN	10.6788	6.81973	NaN	NaN	9.39757	8.89296	8.92411	NaN	9.53017	8.83576	8.8492
474	LQLGSK	6	645.396	1	NaN	NaN	NaN	NaN	8.71881	8.64113	NaN	NaN	NaN	NaN	NaN	NaN	NaN	NaN	NaN	NaN	NaN	NaN	NaN	NaN	NaN	NaN	7.98183	NaN
475	LLVGPF	6	645.396	1	NaN	NaN	NaN	NaN	NaN	NaN	NaN	NaN	NaN	NaN	NaN	NaN	NaN	NaN	NaN	NaN	NaN	NaN	NaN	NaN	NaN	11.6284	7.89461	NaN
476	LTDAVK	6	646.378	1	9.30704	9.2868	8.69344	8.09292	NaN	NaN	NaN	8.28338	NaN	8.69805	NaN	NaN	9.27851	NaN	NaN	7.78891	8.19152	8.76877	NaN	NaN	NaN	NaN	8.45761	8.70431
477	TLATLK	6	646.415	1	6.97766	NaN	NaN	8.65698	8.8482	8.63178	NaN	8.40405	NaN	NaN	NaN	NaN	NaN	NaN	NaN	NaN	NaN	NaN	NaN	NaN	NaN	NaN	8.22712	NaN
478	LTTDSN	6	650.3	1	NaN	NaN	NaN	10.2713	9.84473	NaN	NaN	NaN	NaN	8.03013	NaN	NaN	NaN	NaN	NaN	9.3732	NaN	NaN	NaN	NaN	NaN	8.91784	8.86455	NaN
479	AFLDW	5	651.313	1	9.58037	9.77165	9.4917	9.78983	10.4709	NaN	NaN	8.623	9.79283	8.93806	9.47454	9.37081	NaN	9.43536	NaN	10.2349	10.5282	10.6976	NaN	NaN	9.21284	10.0318	9.89832	9.62437
480	DYLNK	5	652.331	1	7.66684	7.1355	NaN	12.4875	11.798	11.4334	NaN	11.5463	NaN	9.45621	NaN	NaN	10.139	7.68369	8.59722	9.68237	9.17783	9.84321	NaN	NaN	NaN	7.84378	11.2175	11.0239
481	LTSLYG	6	653.351	1	NaN	NaN	NaN	NaN	NaN	NaN	NaN	11.035	NaN	13.4409	12.4162	11.7992	NaN	NaN	NaN	12.2633	NaN	NaN	NaN	NaN	NaN	NaN	11.4898	11.3455
482	YLSGDT	6	655.295	1	14.4369	14.8182	13.8878	12.6203	NaN	12.5126	7.2463	11.4709	14.0989	13.8944	14.9313	15.2763	14.7764	14.8883	15.0812	13.2738	12.8218	12.6587	15.4443	15.1105	14.6903	14.2761	11.6402	11.1713
483	QYDSSG	6	656.255	1	NaN	8.94212	NaN	7.10711	NaN	NaN	NaN	7.40947	7.77572	9.74474	10.5585	9.89342	NaN	7.5702	NaN	9.24636	8.94252	9.59052	9.02038	8.8331	NaN	8.95951	7.85009	8.08812
484	VANPSAP	7	656.326	1	NaN	11.0456	10.4772	12.3847	12.1772	12.1024	6.92577	11.9591	10.9397	11.9481	NaN	11.6837	11.4488	NaN	11.2506	11.5421	11.7224	11.952	11.8071	NaN	11.306	11.4244	11.9357	12.0047
485	YFVEV	5	656.328	1	14.1389	14.7635	NaN	14.0875	14.0947	14.0586	8.76234	13.9772	13.8689	15.0303	15.1424	15.3729	14.4039	13.937	15.0043	15.014	14.7337	14.7401	16.1511	15.529	15.4405	14.3855	14.0237	13.9701
486	KLAEPV	6	656.398	1	15.622	15.9596	15.1965	15.1993	15.2504	15.1153	9.12124	14.7157	14.6517	16.0866	16.1096	16.3011	15.3083	14.9608	14.902	15.5301	14.6895	15.5374	16.2483	16.2497	15.294	15.4391	14.9109	14.9395
487	FLGFSS	6	657.323	1	NaN	NaN	NaN	NaN	NaN	NaN	NaN	NaN	NaN	NaN	NaN	NaN	NaN	NaN	NaN	NaN	NaN	NaN	NaN	NaN	NaN	NaN	9.05569	9.11139
488	LAEPVE	6	657.346	1	11.771	11.1036	10.5169	11.5093	11.5186	11.0234	NaN	11.2565	11.4704	13.3906	13.3023	13.3704	9.37916	9.70724	10.2757	12.5472	12.2191	11.8835	12.5158	NaN	11.0589	12.363	11.2148	10.8261
489	AEPVEL	6	657.344	1	NaN	11.7473	10.2381	NaN	NaN	11.3354	NaN	11.6004	NaN	NaN	NaN	NaN	12.0517	NaN	NaN	NaN	11.2007	11.2283	11.6062	NaN	10.1349	9.81034	10.1204	10.507
490	LGLLEL	6	657.418	1	NaN	NaN	NaN	9.92175	9.90307	NaN	NaN	NaN	NaN	NaN	NaN	8.8878	NaN	NaN	NaN	NaN	NaN	NaN	NaN	NaN	NaN	NaN	8.15629	NaN
491	EFPAVP	6	659.339	1	19.1674	19.1073	18.6486	19.4322	19.5119	19.6629	14.1565	19.176	19.3177	19.0885	18.997	19.0609	18.8126	19.1631	18.675	18.9284	18.6367	19.0031	19.2781	19.6328	19.0246	19.8532	19.4353	19.2223
492	FVHEK	5	659.352	1	12.7264	12.9803	12.2564	12.3952	12.4258	12.4108	NaN	11.4032	12.2825	13.0441	13.0649	13.2605	12.6344	12.6938	12.7965	12.9174	12.114	12.7604	13.3317	13.4958	12.8963	12.4325	12.1557	11.8606
493	VDLGGEA	7	660.321	1	11.212	10.1574	10.6205	9.91492	9.94672	10.0256	NaN	NaN	10.3631	NaN	9.48429	8.79077	9.34299	11.2588	9.4056	8.75471	9.49961	9.52486	9.16843	10.1709	8.74018	10.6282	9.92259	9.82281
494	VVVSGEA	7	660.357	1	NaN	NaN	NaN	NaN	NaN	NaN	NaN	NaN	NaN	NaN	NaN	NaN	NaN	NaN	NaN	NaN	NaN	NaN	NaN	NaN	NaN	8.60497	8.42053	8.7285
495	WVDLK	5	660.371	1	9.44932	9.98436	9.65414	8.8845	NaN	8.96943	NaN	NaN	8.1677	NaN	NaN	NaN	7.64628	10.287	9.2466	NaN	NaN	8.29267	8.65757	10.0351	NaN	8.76311	7.99609	NaN
496	NEALQS	6	661.316	1	NaN	NaN	NaN	NaN	NaN	NaN	NaN	8.52775	NaN	8.60534	NaN	NaN	10.1855	NaN	NaN	NaN	NaN	NaN	NaN	NaN	NaN	9.66465	9.49049	NaN
497	MSVQPT	6	662.319	1	NaN	NaN	NaN	12.4891	12.5519	12.642	NaN	11.99	12.1158	NaN	12.2021	12.2696	NaN	11.3975	10.999	NaN	11.5133	11.7744	11.7399	NaN	11.5152	12.5637	11.8861	11.8737
498	DSTLQV	6	662.336	1	NaN	NaN	NaN	NaN	NaN	NaN	NaN	NaN	NaN	NaN	NaN	NaN	NaN	NaN	15.0045	NaN	NaN	NaN	14.2569	NaN	13.8281	NaN	11.8206	NaN
499	ASGLTSE	7	664.316	1	NaN	NaN	NaN	9.38041	9.79247	9.95935	NaN	9.5029	NaN	NaN	NaN	8.88796	NaN	NaN	NaN	NaN	8.23951	NaN	NaN	NaN	NaN	NaN	8.82117	NaN
500	TFLGNN	6	665.327	1	12.7782	13.595	12.0791	14.6151	14.5348	14.1846	8.88744	14.324	14.2495	15.0725	14.4478	14.6084	13.3471	12.6123	13.6646	14.6842	13.8777	14.5007	15.4507	14.4879	14.5981	14.3837	13.9116	13.7713
501	TYGPGAT	7	666.311	1	12.6239	12.6171	12.3859	11.3432	11.4522	11.4661	NaN	9.79879	11.3636	11.1662	12.4218	12.169	11.5108	11.8908	11.6364	12.0223	13.0159	12.4184	13.2955	13.1271	12.6263	11.0475	10.2685	9.874
502	AATEFK	6	666.347	1	NaN	NaN	NaN	10.7229	10.4376	9.54758	NaN	NaN	NaN	NaN	NaN	NaN	NaN	NaN	NaN	NaN	NaN	NaN	NaN	NaN	NaN	NaN	9.9687	10.4621
503	AYLDW	5	667.309	1	12.1689	12.3953	11.805	12.4103	12.6292	12.7312	NaN	11.6414	11.9255	12.4894	12.7299	12.7271	10.9434	10.9667	10.7837	12.6327	12.2254	12.8706	12.9396	12.5611	11.6484	11.9878	11.9958	12.0352
504	VSAYLD	6	667.331	1	10.1524	9.75913	NaN	NaN	10.671	11.2487	NaN	10.3808	NaN	13.2096	9.21634	NaN	NaN	NaN	NaN	11.9974	10.8487	NaN	NaN	NaN	NaN	NaN	10.825	11.468
505	LEPLVP	6	667.402	1	NaN	NaN	NaN	NaN	NaN	NaN	NaN	NaN	NaN	NaN	NaN	NaN	NaN	NaN	NaN	NaN	NaN	NaN	NaN	NaN	NaN	NaN	9.36791	9.47644
506	SLYGTK	6	668.361	1	11.1861	10.7771	10.0327	14.2364	14.5044	14.3718	8.09123	14.2653	8.55182	13.2232	NaN	NaN	13.4935	NaN	11.5487	13.3898	12.6512	13.7465	NaN	10.4074	8.85689	9.87025	13.8869	13.9578
507	LVVAGLP	7	668.434	1	9.66279	9.44011	9.31957	8.42521	8.52807	8.79517	NaN	8.65305	8.64723	8.76532	8.2233	8.56082	9.06656	8.36745	8.52391	8.89517	8.26658	8.86975	9.64226	9.64229	9.18091	8.95514	8.6987	NaN
508	YFLEV	5	670.345	1	13.1915	13.7207	12.2502	13.1123	13.0853	13.1315	7.69346	12.9079	12.9705	13.7642	14.0429	14.2111	13.2552	12.8776	13.8745	13.8473	13.6099	13.5887	15.0995	14.4614	14.3945	13.5288	13.0571	13.0858
509	AVHGVTS	7	670.352	1	13.3035	13.0714	12.5493	12.8922	11.7844	10.9276	NaN	10.927	12.0541	NaN	12.0767	NaN	12.6387	11.7379	NaN	NaN	NaN	NaN	13.5877	14.1004	12.2866	11.8576	10.967	10.0323
510	TLLPNN	6	671.373	1	11.8094	NaN	NaN	NaN	10.0178	10.3205	NaN	NaN	10.6924	NaN	9.34022	NaN	NaN	NaN	NaN	NaN	10.8804	NaN	NaN	NaN	11.3461	10.5494	9.71044	NaN
511	LLSQLV	6	672.429	1	NaN	NaN	NaN	NaN	NaN	NaN	NaN	NaN	NaN	NaN	NaN	NaN	NaN	NaN	NaN	NaN	NaN	NaN	NaN	NaN	NaN	11.1181	10.5666	10.4712
512	LDLGGEA	7	674.337	1	15.8092	15.978	15.3969	16.2141	16.5073	16.3893	10.9738	15.5491	15.9801	14.9113	15.6125	15.7479	14.9539	16.0079	15.3808	15.1283	15.0658	15.3594	16.187	16.6879	15.9511	16.5281	16.1427	15.9339
513	LLFANP	6	674.387	1	9.66634	9.85775	9.32227	12.1032	12.4328	12.3358	NaN	NaN	11.2121	10.8088	10.4664	11.0327	NaN	NaN	NaN	10.5991	10.5841	10.8786	NaN	NaN	NaN	11.5615	11.1977	11.2053
514	SYDYK	5	675.3	1	NaN	NaN	NaN	9.66766	9.67035	9.52505	NaN	8.25133	NaN	8.31039	NaN	NaN	9.88171	NaN	9.60224	8.89887	NaN	9.19601	NaN	8.89167	8.93221	NaN	9.02293	8.57582
515	LNSNDL	6	675.333	1	13.3426	NaN	12.7813	12.0424	12.3557	12.2194	NaN	10.9116	11.7854	12.7278	13.8048	13.6354	12.4443	13.3871	12.2334	12.0229	12.1319	11.9288	13.3881	13.4073	12.5333	12.7319	11.4502	11.1217
516	DWLDQ	5	676.295	1	NaN	NaN	NaN	NaN	NaN	NaN	NaN	NaN	NaN	12.2404	14.953	NaN	NaN	NaN	NaN	NaN	NaN	NaN	NaN	NaN	NaN	NaN	10.2328	NaN
517	NDDWQ	5	677.254	1	11.6105	12.1407	11.4252	NaN	12.1573	12.27	7.44862	11.3466	11.3301	NaN	NaN	NaN	11.9875	11.8828	11.9503	NaN	NaN	NaN	NaN	12.4444	11.725	NaN	11.3882	11.5062
518	LNTGDAS	7	677.311	1	12.5263	12.6559	11.8629	11.0806	10.9093	10.8387	NaN	10.2834	11.4745	10.7998	11.8406	11.959	11.7534	12.271	12.1954	11.065	11.3893	10.9855	13.4707	13.1684	13.1487	11.741	10.5032	10.2494
519	WGSTVK	6	677.362	1	13.6913	NaN	12.7129	NaN	13.6875	13.3072	8.30951	12.6991	9.81945	13.223	NaN	NaN	13.7311	11.2072	12.1293	12.5377	11.696	11.6738	NaN	13.0832	NaN	11.1628	12.9465	12.382
520	RFQEV	5	678.345	1	8.19352	NaN	7.68392	NaN	8.82996	8.47406	NaN	NaN	9.80716	NaN	NaN	NaN	NaN	10.5675	10.5211	NaN	NaN	NaN	10.5682	NaN	NaN	NaN	8.01934	7.54822
521	TYLGPK	6	678.384	1	NaN	NaN	NaN	9.00157	NaN	9.31752	NaN	NaN	8.56573	NaN	NaN	NaN	NaN	NaN	7.34956	7.64491	NaN	8.2606	NaN	NaN	8.60083	8.96147	8.16849	NaN
522	AAGYDLA	7	680.326	1	11.4377	11.8452	NaN	12.3569	13.1579	NaN	NaN	12.5605	11.4564	11.0594	NaN	NaN	12.8215	NaN	NaN	11.6334	11.5097	NaN	NaN	11.6673	NaN	NaN	12.4509	12.2515
523	VAEHPQ	6	680.337	1	13.0649	13.1913	12.4035	11.8724	12.1793	11.8468	NaN	11.1905	10.1241	12.6081	12.751	12.527	12.6908	13.0747	12.8555	12.6563	11.8225	12.5495	13.2511	13.2668	12.3974	11.8819	11.642	11.384
524	LQYEK	5	680.363	1	NaN	NaN	NaN	9.75083	8.1462	9.78569	NaN	9.44513	9.03954	9.45461	8.32566	7.9587	8.93973	NaN	NaN	9.01744	6.73258	8.90679	9.04272	9.11126	8.60148	9.20422	9.45152	7.41917
525	YQASGGT	7	683.3	1	NaN	9.83738	9.7437	9.60502	9.66396	10.1058	NaN	8.56785	9.99792	9.00714	10.2471	9.79416	8.20561	10.7334	9.55075	10.3767	11.2019	10.8387	10.5394	10.7578	10.0812	10.1912	9.38396	9.26802
526	EYFGNG	6	686.28	1	11.4644	12.1869	NaN	13.4084	13.4576	13.6444	8.52829	12.7951	13.8136	12.8484	13.2494	13.4457	10.6538	10.9952	11.3965	12.454	12.1054	12.6957	13.5586	13.3024	12.7609	14.1789	13.1674	12.7203
527	WTNGPL	6	687.347	1	NaN	10.715	10.8729	11.4479	NaN	NaN	NaN	9.8014	NaN	NaN	NaN	NaN	NaN	NaN	NaN	NaN	NaN	13.1761	12.159	NaN	NaN	12.1935	11.6315	11.4688
528	APQTGASG	8	688.329	1	10.9913	11.0188	NaN	9.66927	NaN	9.46611	NaN	8.92997	9.9188	9.74073	NaN	NaN	10.8222	10.8075	11.4416	8.67321	NaN	8.95535	NaN	11.4174	10.1607	9.83208	8.31966	NaN
529	DLALEK	6	688.388	1	16.1416	16.1586	15.7675	15.5818	15.7297	15.9107	9.9055	14.0415	15.256	14.3338	14.7833	15.085	16.4698	17.0688	17.1378	14.5843	14.5837	14.374	15.7061	16.9398	16.4958	16.008	15.2111	14.7219
530	SGDTWK	6	693.321	1	12.5166	12.3286	11.8609	13.3292	13.6606	13.7504	7.73035	12.6258	10.3678	13.5336	NaN	NaN	12.8009	10.8439	12.0884	13.7189	13.0359	14.1887	NaN	12.5348	11.7681	11.2832	13.3305	13.1607
531	FADGGLD	7	694.306	1	NaN	NaN	NaN	NaN	NaN	NaN	NaN	NaN	NaN	NaN	NaN	NaN	NaN	NaN	NaN	NaN	NaN	NaN	NaN	NaN	NaN	13.6035	12.6637	12.5424
532	VLGEYD	6	695.329	1	9.74894	9.09475	9.08261	8.74381	NaN	NaN	NaN	NaN	12.3007	8.46773	12.2687	12.9314	NaN	11.9986	NaN	8.13647	8.91614	8.48626	12.2243	11.1685	11.8346	11.9658	8.20203	NaN
533	MALADY	6	699.302	1	11.3438	NaN	NaN	NaN	NaN	NaN	7.15785	NaN	NaN	NaN	NaN	NaN	NaN	8.28946	NaN	NaN	NaN	NaN	10.4975	10.9635	10.8886	NaN	10.7473	NaN
534	FCVSGST	7	700.295	1	NaN	NaN	NaN	11.2711	11.623	11.5408	NaN	NaN	11.6896	10.0679	11.112	10.6328	NaN	NaN	NaN	11.2926	11.3743	11.8584	11.234	NaN	NaN	11.4182	10.8457	10.3141
535	AHCVDR	6	350.665	2	7.45356	8.94796	7.08443	7.3462	NaN	NaN	NaN	NaN	NaN	NaN	NaN	NaN	9.26333	10.2838	7.45309	NaN	7.30464	NaN	8.39965	8.29414	9.17265	5.73554	6.62324	NaN
536	VNGGPAGE	8	700.328	1	NaN	NaN	NaN	NaN	NaN	9.14705	NaN	8.83435	7.60399	NaN	NaN	NaN	NaN	NaN	NaN	NaN	NaN	NaN	NaN	NaN	NaN	NaN	8.14968	NaN
537	ANKPGDV	7	700.363	1	NaN	NaN	NaN	NaN	NaN	NaN	NaN	NaN	NaN	NaN	NaN	NaN	NaN	NaN	NaN	NaN	NaN	8.73136	NaN	NaN	NaN	9.60599	8.82638	NaN
538	DLALLR	6	350.722	2	10.0901	NaN	8.90457	NaN	NaN	10.7087	NaN	10.1335	NaN	NaN	NaN	NaN	11.5754	NaN	NaN	NaN	10.3344	NaN	NaN	NaN	NaN	NaN	9.42626	10.1039
539	AAVKELA	7	351.214	2	10.4092	9.85854	9.92638	8.75385	9.30699	NaN	NaN	9.4423	NaN	9.89692	8.27441	NaN	8.82059	NaN	NaN	8.40949	8.7963	8.07702	10.8384	10.7983	8.8515	NaN	7.41197	NaN
540	ELNNGR	6	351.681	2	NaN	NaN	NaN	NaN	NaN	NaN	NaN	NaN	NaN	NaN	NaN	NaN	NaN	NaN	NaN	NaN	NaN	NaN	NaN	NaN	NaN	NaN	7.47903	7.77668
541	LLDNLD	6	702.367	1	11.5306	11.3733	NaN	12.6578	13.6102	12.5263	NaN	11.9488	NaN	14.4698	14.7646	15.2429	NaN	NaN	NaN	13.187	12.0793	13.0999	13.6177	13.1127	12.0829	NaN	13.113	12.8539
542	LDNLDL	6	702.367	1	13.8685	14.8386	13.5712	15.7348	15.875	15.7017	10.5729	15.0559	15.5416	15.1312	15.2525	15.4103	14.6444	NaN	15.3072	15.0201	14.6633	15.3833	16.2355	15.8224	15.7068	15.7231	15.5965	15.4211
543	FLSLHS	6	352.193	2	11.3898	11.3242	10.1606	10.6865	14.1516	14.0303	8.92884	14.5283	9.83635	14.4985	13.0782	12.7792	12.4377	NaN	NaN	12.5857	12.8422	13.039	10.8586	9.09152	NaN	10.5281	13.0709	13.7629
544	LWLDTG	6	704.361	1	12.7183	NaN	NaN	NaN	NaN	NaN	8.01087	NaN	12.859	NaN	NaN	NaN	NaN	12.159	NaN	NaN	NaN	NaN	14.1145	NaN	NaN	NaN	12.9071	NaN
545	FLVDNP	6	704.363	1	NaN	NaN	NaN	NaN	NaN	NaN	9.01563	NaN	14.4932	NaN	NaN	NaN	NaN	NaN	13.2637	12.5676	NaN	NaN	NaN	NaN	14.1795	NaN	13.7015	NaN
546	TMNNDL	6	707.305	1	12.2004	NaN	12.059	NaN	10.8976	11.2951	NaN	NaN	NaN	10.0598	10.5706	NaN	10.3787	11.8701	11.2695	NaN	12.0016	10.8535	12.7429	NaN	12.0624	NaN	10.9892	NaN
547	YLPTVD	6	707.362	1	15.5383	15.6202	15.071	15.6808	15.7372	15.7018	10.1892	13.8553	15.7493	14.1442	15.4391	15.6844	14.7686	16.9712	15.9719	15.3453	15.457	15.6798	16.6349	16.4964	16.2524	15.8246	15.073	14.7921
548	GVWFAK	6	354.199	2	NaN	NaN	NaN	NaN	9.41473	NaN	NaN	9.29311	NaN	NaN	NaN	NaN	7.9719	NaN	NaN	NaN	NaN	NaN	NaN	NaN	NaN	NaN	9.11685	9.50428
549	YGSLSPS	7	710.337	1	12.3162	NaN	NaN	NaN	NaN	NaN	NaN	12.7068	NaN	14.0993	NaN	NaN	11.1573	NaN	NaN	14.1463	NaN	NaN	NaN	NaN	NaN	11.1864	12.9306	NaN
550	FSETVK	6	355.691	2	NaN	NaN	NaN	NaN	8.1547	8.24821	NaN	7.03633	NaN	NaN	NaN	NaN	NaN	NaN	NaN	NaN	NaN	NaN	NaN	NaN	NaN	NaN	7.54804	NaN
551	LVVHQD	6	355.696	2	NaN	NaN	NaN	NaN	NaN	NaN	NaN	NaN	7.36131	9.2177	10.9185	11.1437	NaN	9.90977	7.81148	8.61179	NaN	8.46893	NaN	7.39675	NaN	9.06046	6.83713	NaN
552	HEKWN	5	357.173	2	NaN	NaN	NaN	9.27848	9.95308	9.33408	NaN	NaN	8.62756	9.97114	9.61207	9.3568	8.26397	NaN	NaN	9.61915	8.88625	9.89093	9.78704	NaN	NaN	9.23766	9.47578	9.5789
553	GKGPLEN	7	357.694	2	NaN	NaN	NaN	NaN	NaN	NaN	NaN	NaN	NaN	NaN	NaN	NaN	NaN	NaN	NaN	NaN	NaN	NaN	NaN	NaN	NaN	8.47496	7.70297	NaN
554	LLAPDW	6	714.379	1	7.94831	6.9882	NaN	NaN	NaN	7.58615	NaN	NaN	7.33073	NaN	NaN	NaN	NaN	8.26981	NaN	8.3975	9.20421	8.67533	7.37504	NaN	NaN	NaN	7.16247	NaN
555	SMLADY	6	715.3	1	NaN	NaN	NaN	NaN	NaN	10.7766	NaN	10.6854	NaN	NaN	NaN	NaN	12.8032	NaN	12.0301	NaN	NaN	NaN	NaN	NaN	NaN	10.7637	9.19546	NaN
556	DSLQPR	6	358.191	2	NaN	NaN	NaN	NaN	NaN	NaN	NaN	NaN	NaN	NaN	NaN	NaN	6.77343	NaN	7.51483	6.88754	7.26299	NaN	NaN	NaN	NaN	6.90687	6.97972	NaN
557	LGGAQNR	7	358.197	2	NaN	7.82569	7.31238	NaN	9.96517	NaN	NaN	NaN	NaN	NaN	NaN	NaN	NaN	NaN	NaN	8.10941	8.50233	9.18541	NaN	NaN	NaN	NaN	9.43979	NaN
558	ELKNGR	6	358.707	2	NaN	NaN	NaN	9.26692	10.053	9.89278	NaN	9.16947	NaN	8.90688	NaN	NaN	NaN	NaN	NaN	NaN	NaN	NaN	NaN	NaN	NaN	NaN	NaN	NaN
559	QALVTGK	7	358.719	2	NaN	NaN	NaN	6.27921	7.33801	7.06232	NaN	7.50734	NaN	6.93712	NaN	NaN	NaN	NaN	NaN	NaN	NaN	NaN	NaN	NaN	NaN	NaN	6.57634	NaN
560	VSGTAPW	7	717.357	1	NaN	NaN	NaN	NaN	NaN	NaN	NaN	NaN	NaN	NaN	NaN	NaN	NaN	NaN	NaN	NaN	NaN	NaN	NaN	NaN	NaN	12.0086	11.3854	11.4037
561	SAQLGDK	7	359.69	2	14.6362	14.765	14.2826	15.0203	15.0083	14.9769	9.86371	14.577	14.9013	15.0317	15.1709	15.2846	14.2038	14.7218	14.6861	14.7717	14.2526	14.4101	15.2825	15.1144	14.5534	15.2638	14.8513	14.6929
562	VFKNPN	6	359.699	2	NaN	10.0177	NaN	10.7229	11.0329	10.9551	NaN	10.0818	10.7834	12.3147	13.3628	12.8672	NaN	8.73903	8.96698	11.8078	10.9752	11.2883	11.8333	11.2126	9.99024	12.1413	10.6716	10.7265
563	TYGYES	6	719.29	1	10.0641	10.5338	9.21566	9.59331	10.4928	9.81031	NaN	9.18889	9.74021	10.8937	11.281	10.9772	9.31456	NaN	9.27224	11.0635	11.0164	11.3933	10.3389	10.8023	8.87677	10.3157	9.89794	9.56611
564	VSVGGTEA	8	719.358	1	9.40902	9.29589	8.91177	NaN	9.31971	9.41439	NaN	8.60325	9.11265	NaN	9.09376	9.52616	NaN	NaN	NaN	9.42329	NaN	9.70858	NaN	NaN	NaN	NaN	8.99806	8.49746
565	MAAVEAK	7	360.194	2	8.7017	NaN	NaN	10.2312	9.98138	10.0744	NaN	10.2593	NaN	8.51264	NaN	NaN	9.78899	NaN	NaN	NaN	9.73471	9.72571	NaN	NaN	NaN	NaN	9.93987	NaN
566	GHSYEK	6	360.67	2	8.92704	8.66307	NaN	NaN	NaN	NaN	NaN	NaN	6.55905	8.25406	NaN	9.01607	7.70387	NaN	NaN	8.24277	9.12439	8.98589	NaN	NaN	NaN	NaN	7.72563	NaN
567	TNPDGFA	7	721.316	1	14.9436	15.8369	14.5292	15.8246	16.6897	16.2521	10.8585	16.0052	15.7565	16.2767	15.2418	14.8591	15.1041	14.1074	15.226	16.2501	16.0846	16.6322	16.5472	16.2029	15.7652	15.8481	16.0189	15.7839
568	TASGGLES	8	721.337	1	17.173	17.0141	16.7499	15.9538	15.7641	15.8669	11.1236	14.5908	16.4024	15.0259	15.5361	15.7788	16.564	17.0007	16.2067	15.1945	15.4026	15.2766	16.5067	17.3529	16.8804	16.675	15.3638	15.0825
569	TASNLES	7	721.337	1	NaN	NaN	NaN	15.9538	NaN	NaN	NaN	NaN	NaN	NaN	15.5361	15.7788	NaN	NaN	NaN	15.1945	15.4026	NaN	NaN	NaN	NaN	NaN	15.3638	NaN
570	ADGFGGAGA	9	722.313	1	NaN	NaN	NaN	12.8251	12.4783	NaN	NaN	NaN	NaN	NaN	NaN	12.5076	NaN	15.0524	NaN	NaN	NaN	13.1114	NaN	NaN	14.3141	NaN	11.7414	11.4096
571	VTGEGPY	7	722.336	1	NaN	NaN	NaN	8.85999	7.85776	8.26156	NaN	NaN	NaN	NaN	NaN	8.57904	NaN	NaN	NaN	NaN	NaN	NaN	NaN	NaN	NaN	9.96613	8.75466	8.80727
572	YNQGLK	6	722.385	1	9.42352	9.78056	8.98676	9.29069	8.18207	NaN	NaN	NaN	9.22051	8.23084	9.52995	9.18046	9.97558	8.25423	10.0801	8.52849	9.25085	8.4253	9.67751	9.89307	9.41132	9.18669	7.61483	8.46772
573	GYESHM	6	362.143	2	8.55894	8.0349	7.40936	NaN	8.71391	NaN	NaN	7.52315	7.95285	8.56502	8.16346	8.25792	9.62769	8.48001	9.27338	7.99031	NaN	8.47577	8.6971	9.57201	8.89442	NaN	7.82226	NaN
574	ANYLNK	6	362.188	2	9.48564	NaN	8.63921	13.6418	14.0585	13.6659	8.52141	13.6972	7.99313	11.6679	NaN	NaN	12.2543	NaN	10.6671	11.3271	NaN	NaN	NaN	NaN	NaN	NaN	13.3373	13.1863
575	ADYLNK	6	723.367	1	NaN	9.12206	NaN	12.8864	13.2609	12.9189	NaN	12.7824	NaN	10.4922	NaN	NaN	NaN	8.24161	NaN	NaN	NaN	10.5229	NaN	NaN	8.3302	9.11338	12.3399	12.2135
576	FYALPL	6	723.403	1	NaN	12.2854	12.1094	NaN	11.1172	11.622	NaN	NaN	NaN	NaN	11.164	NaN	NaN	NaN	NaN	NaN	NaN	10.4773	NaN	11.8543	11.7369	NaN	10.5408	NaN
577	FGNEGNS	7	724.291	1	NaN	NaN	NaN	NaN	NaN	8.27044	NaN	NaN	NaN	NaN	9.7367	NaN	NaN	NaN	9.19246	9.32754	9.5562	NaN	NaN	9.91485	NaN	NaN	8.00033	NaN
578	FYLGPK	6	362.704	2	NaN	8.15532	7.66127	8.20102	8.4984	8.87049	NaN	NaN	8.13741	NaN	NaN	NaN	NaN	7.59453	NaN	NaN	7.89901	6.86448	8.71934	8.94359	8.68594	8.43198	NaN	NaN
579	LLYPYG	6	363.197	2	14.0493	14.7737	13.5261	15.4867	15.5533	15.0045	10.1891	14.4669	15.3836	15.9162	15.6934	15.6287	14.722	14.1016	14.9094	10.6939	14.635	10.4465	16.1264	15.377	15.2481	15.8118	10.4149	14.4428
580	SYWGSK	6	364.176	2	11.2556	11.5144	10.3694	12.2281	12.5695	12.6116	7.10192	NaN	9.44127	12.6485	7.19117	8.77171	13.5454	9.27062	12.3668	12.3989	11.8239	12.1273	8.42191	11.6083	10.6078	10.6573	11.928	12.1495
581	LVVHYP	6	364.211	2	11.0301	11.5121	NaN	NaN	NaN	10.1964	NaN	NaN	NaN	8.99034	8.95291	8.52007	NaN	8.42112	NaN	8.35548	8.41946	7.52159	10.9456	11.6828	11.3323	10.2213	9.05927	8.74662
582	YVSSDGT	7	728.31	1	14.1126	14.233	13.4536	15.2555	15.7882	15.3185	10.0263	14.6561	15.4025	15.9445	16.5543	16.5974	11.3831	12.9577	11.7844	15.5481	14.5547	15.3897	15.6074	15.164	13.9352	16.5568	15.8378	15.5237
583	YTYGPQ	6	728.326	1	NaN	NaN	8.61294	9.59589	10.0422	9.43522	NaN	NaN	9.92853	10.6393	12.5531	12.0861	NaN	NaN	NaN	11.8006	11.2308	11.8598	11.1781	10.1396	9.13998	10.8933	9.86411	9.66677
584	SFSFEL	6	729.344	1	12.5955	13.8498	12.1511	15.1971	13.1803	13.4527	8.62652	NaN	13.4696	12.3611	NaN	11.0726	16.5747	12.2738	16.0669	12.7298	NaN	NaN	13.5722	13.2969	14.5679	11.6347	NaN	NaN
585	QTGLPGGT	8	730.375	1	16.5359	15.3103	15.7405	12.6309	12.4625	NaN	7.96664	NaN	13.7338	10.9549	12.747	12.9883	15.3268	17.7038	15.8932	12.1845	11.9441	11.0052	15.1028	16.1565	15.1125	14.0746	11.595	11.1163
586	AHCLSNS	7	731.316	1	NaN	NaN	NaN	NaN	NaN	NaN	NaN	NaN	NaN	8.63309	8.08134	7.8396	NaN	NaN	NaN	8.13017	NaN	8.03193	8.09003	NaN	NaN	7.60475	7.12835	NaN
587	LFDEHA	6	366.174	2	8.3544	8.26905	7.60016	9.57043	9.17243	NaN	NaN	NaN	NaN	NaN	7.98335	8.56869	NaN	NaN	9.57528	8.21395	8.70401	8.6738	9.6119	9.66566	9.42768	NaN	8.34948	8.70788
588	TLMEHT	6	366.174	2	11.1719	11.4465	10.294	10.4323	10.9345	10.2336	NaN	10.2713	10.4255	11.7653	11.1609	11.2744	11.9375	11.0998	11.7248	11.7094	10.8349	11.6504	11.7076	11.8586	11.2294	10.7625	10.7841	10.4814
589	TNGQLAK	7	366.208	2	NaN	NaN	NaN	NaN	7.24012	7.21138	NaN	NaN	NaN	NaN	NaN	NaN	NaN	NaN	NaN	NaN	NaN	NaN	NaN	NaN	NaN	NaN	5.96839	NaN
590	WVDLAK	6	366.209	2	NaN	NaN	NaN	NaN	NaN	NaN	NaN	NaN	NaN	NaN	NaN	NaN	8.58586	NaN	NaN	NaN	NaN	NaN	NaN	NaN	NaN	NaN	8.6425	8.49448
591	SKLGALGS	8	366.715	2	NaN	NaN	NaN	NaN	10.7211	NaN	NaN	10.3614	NaN	11.6545	NaN	11.2941	NaN	NaN	NaN	11.1832	NaN	NaN	NaN	NaN	NaN	NaN	9.74146	NaN
592	DLDTAAK	7	367.191	2	7.74837	NaN	NaN	8.56598	9.30008	8.2753	NaN	8.88045	NaN	8.55911	NaN	NaN	8.12465	NaN	NaN	NaN	8.06847	8.38825	NaN	NaN	NaN	NaN	8.15236	8.76896
593	YLTLHS	6	367.199	2	9.41747	9.20868	NaN	NaN	10.9419	10.5691	NaN	10.2593	NaN	11.4933	10.8554	10.6171	9.61678	NaN	NaN	10.0884	10.7289	10.427	9.63953	NaN	NaN	NaN	9.47331	10.232
594	KWSGEK	6	734.385	1	13.1875	NaN	11.1089	13.9296	15.2852	14.9091	8.84461	14.9203	14.5993	13.1361	14.6599	NaN	13.1156	12.744	12.314	12.5891	NaN	12.326	14.1032	13.7478	NaN	15.1118	13.4039	14.8262
595	SGGTLDW	7	735.331	1	15.0674	15.2774	NaN	14.564	13.2725	NaN	8.93705	NaN	14.7084	12.1438	13.6173	13.5964	13.8258	15.1737	15.5167	14.0615	14.9795	14.1905	15.6566	15.7513	15.7991	NaN	12.5142	12.0275
596	QFLPSSG	7	735.368	1	NaN	NaN	NaN	NaN	NaN	NaN	NaN	NaN	NaN	NaN	NaN	NaN	NaN	NaN	NaN	NaN	NaN	NaN	NaN	NaN	NaN	11.0136	11.1918	NaN
597	MAAVEAK	7	368.19	2	NaN	NaN	NaN	NaN	NaN	7.36142	NaN	7.62611	NaN	6.95309	NaN	NaN	NaN	NaN	NaN	NaN	NaN	NaN	NaN	NaN	NaN	NaN	6.96261	7.18572
598	TTLLYK	6	369.724	2	NaN	NaN	NaN	NaN	NaN	NaN	NaN	NaN	NaN	NaN	NaN	NaN	NaN	NaN	NaN	NaN	NaN	NaN	NaN	NaN	NaN	NaN	7.33951	7.25437
599	VTGHLLV	7	369.73	2	NaN	8.60401	NaN	9.13825	8.19917	9.04185	NaN	9.3871	NaN	NaN	NaN	NaN	11.1994	NaN	10.987	NaN	NaN	NaN	NaN	NaN	9.42595	NaN	7.36347	NaN
600	NGPLPDK	7	370.7	2	8.70125	7.59892	8.4363	10.118	10.2175	10.5055	NaN	8.5214	10.2999	8.42148	9.19782	9.35678	NaN	8.17092	7.01004	NaN	10.5827	9.67938	9.62606	8.67051	NaN	9.61682	9.65997	8.75791
601	HTLEEL	6	741.38	1	12.7267	13.4541	12.3793	12.3579	12.2213	12.4427	6.75293	11.3237	11.8441	11.147	11.1899	11.6899	13.15	13.3584	13.1042	11.3066	11.2964	11.6092	13.8346	14.3876	13.8169	11.7045	11.3216	10.905
602	VMSSYGV	7	371.682	2	NaN	NaN	NaN	NaN	NaN	NaN	NaN	9.58802	NaN	NaN	NaN	NaN	NaN	NaN	NaN	NaN	8.54996	9.50236	NaN	NaN	NaN	NaN	9.25253	10.2976
603	EWLSHA	6	371.68	2	NaN	NaN	NaN	NaN	NaN	11.5346	NaN	10.7644	11.4185	NaN	10.6409	11.1522	NaN	12.0847	13.2446	11.6926	NaN	11.854	12.135	NaN	NaN	NaN	11.2414	10.8601
604	LDTGLHS	7	371.692	2	14.1745	14.2039	13.8973	12.1414	12.0755	11.9367	NaN	11.0855	12.0066	11.6225	12.3288	12.4953	14.1747	14.6691	14.5145	12.1608	11.8279	11.7577	13.3358	13.7869	13.2893	12.1849	11.6065	11.1787
605	HTFNPK	6	372.196	2	7.42517	NaN	NaN	8.87911	9.30933	9.06276	NaN	8.0309	8.46198	8.52006	9.03036	NaN	NaN	NaN	NaN	8.54781	8.5421	9.07101	NaN	NaN	8.15463	NaN	8.68458	NaN
606	TLVLVEA	7	744.45	1	NaN	NaN	NaN	NaN	NaN	NaN	NaN	NaN	NaN	NaN	NaN	NaN	NaN	NaN	NaN	NaN	NaN	NaN	NaN	NaN	NaN	NaN	10.509	10.7899
607	LLNLSGK	7	372.735	2	NaN	NaN	NaN	NaN	10.1089	10.4115	NaN	10.5401	NaN	NaN	NaN	NaN	NaN	NaN	NaN	NaN	NaN	NaN	NaN	NaN	NaN	9.94141	9.98628	10.2442
608	FLVPVLG	7	744.465	1	NaN	NaN	NaN	NaN	NaN	NaN	NaN	NaN	NaN	NaN	NaN	NaN	NaN	NaN	NaN	NaN	NaN	NaN	NaN	NaN	NaN	NaN	9.52209	9.45976
609	LDPSDAK	7	373.192	2	11.6062	11.61	10.7812	10.2395	10.4438	10.7697	NaN	9.17455	9.05695	11.026	10.865	11.1194	11.7732	11.889	13.2837	11.931	10.9939	12.2145	11.6077	13.4914	13.0743	9.54385	10.4242	10.2524
610	LVVGGTEA	8	745.406	1	9.66974	9.47858	9.23994	9.53794	9.67087	9.36742	NaN	NaN	9.09504	8.40289	9.12752	9.41189	10.2385	9.43278	10.0341	9.47549	9.22105	9.5856	9.79726	9.45187	8.9329	9.14659	9.21094	8.27862
611	LSWLNN	6	746.383	1	NaN	NaN	7.64045	NaN	7.45398	NaN	NaN	NaN	NaN	NaN	NaN	NaN	NaN	NaN	NaN	NaN	NaN	NaN	12.8617	NaN	NaN	8.14952	12.1868	NaN
612	QLLLYP	6	746.444	1	NaN	NaN	8.62372	12.1312	12.3505	11.6429	NaN	NaN	11.9713	12.2427	12.4869	12.7801	10.4805	9.71737	10.6917	13.2123	NaN	12.2823	12.6314	NaN	NaN	12.2633	11.5371	10.8965
613	TLMEHT	6	374.172	2	NaN	7.32966	NaN	8.5621	8.15642	8.18675	NaN	7.7195	NaN	8.15337	NaN	NaN	7.79721	6.92468	8.55116	8.13453	NaN	7.90471	7.52327	8.55577	6.94317	8.34867	8.01214	8.06564
614	WNTDDV	6	749.311	1	16.7909	NaN	16.2986	15.786	15.2995	15.1407	10.6657	13.2231	16.6098	14.3699	NaN	NaN	16.1706	17.6173	17.0237	15.3065	15.5488	NaN	17.4675	NaN	NaN	16.708	14.68	NaN
615	FADDGLN	7	751.327	1	NaN	NaN	NaN	NaN	NaN	NaN	NaN	NaN	NaN	NaN	NaN	NaN	NaN	NaN	NaN	NaN	NaN	NaN	NaN	NaN	NaN	11.1681	10.0922	10.0314
616	FVLYPL	6	751.439	1	NaN	NaN	NaN	NaN	NaN	NaN	NaN	NaN	NaN	NaN	NaN	NaN	NaN	NaN	NaN	NaN	NaN	NaN	NaN	NaN	NaN	8.1211	6.0972	7.50945
617	LTFGEDA	7	752.361	1	NaN	9.53724	NaN	14.3868	14.2475	13.9325	NaN	14.2855	13.9908	12.8965	12.7441	13.3055	10.8087	NaN	10.815	12.0062	10.7614	11.7418	11.9334	10.7324	11.5509	14.3356	13.9867	13.7156
618	LGEYDR	6	376.684	2	10.1428	10.1736	9.70794	11.2004	10.9068	11.2999	6.45635	9.59828	10.4056	10.0871	7.47054	9.79018	9.98252	10.9396	11.0424	9.72339	9.85099	10.1509	8.70916	10.573	11.3141	10.4577	10.7234	10.023
619	LGTFDSN	7	753.341	1	NaN	NaN	NaN	NaN	NaN	NaN	NaN	NaN	NaN	9.9661	9.85301	NaN	NaN	NaN	NaN	NaN	NaN	NaN	NaN	NaN	NaN	NaN	7.96864	8.64515
620	SCCAGASGV	9	377.647	2	NaN	NaN	NaN	NaN	NaN	10.3763	NaN	NaN	NaN	NaN	9.66549	NaN	NaN	10.816	NaN	9.45352	9.8651	10.0561	10.8233	NaN	NaN	NaN	9.1129	NaN
621	SAYLDW	6	754.341	1	11.2863	11.8611	11.1552	12.4978	12.9076	12.8587	6.86526	12.0263	11.6049	12.6685	13.0308	12.605	NaN	NaN	NaN	12.9549	12.295	13.259	12.0469	11.9934	NaN	12.2178	12.4435	12.429
622	LTSLYGT	7	754.399	1	NaN	10.4609	NaN	NaN	NaN	11.9541	NaN	13.0628	NaN	13.6579	11.5753	11.0422	NaN	NaN	NaN	12.3855	11.1028	12.07	9.79648	NaN	NaN	10.6855	12.1673	12.1957
623	NPSRPW	6	378.694	2	13.8111	12.8078	13.4461	9.77203	10.1496	10.5672	NaN	NaN	NaN	NaN	11.0266	NaN	NaN	13.7126	12.4637	10.4418	11.6294	NaN	10.9849	NaN	10.9517	10.5007	9.47047	NaN
624	DVNNLGK	7	380.205	2	NaN	NaN	6.01138	NaN	8.16324	7.94275	NaN	NaN	NaN	7.0446	NaN	7.25069	NaN	NaN	NaN	NaN	NaN	NaN	NaN	7.56619	NaN	7.85519	8.00267	7.65331
625	VFKNPR	6	380.727	2	10.9291	11.8393	10.6457	13.0424	13.2368	13.0097	7.34891	12.8136	12.3533	13.1089	13.3046	12.8754	12.3315	NaN	NaN	12.4194	12.1012	12.4999	12.8157	11.7257	11.3348	13.3201	12.8376	12.8645
626	EVVDDW	6	762.332	1	NaN	NaN	NaN	NaN	NaN	NaN	NaN	NaN	NaN	NaN	NaN	NaN	NaN	NaN	9.34521	NaN	NaN	NaN	NaN	NaN	NaN	10.254	9.5431	9.52841
627	LVESSEV	7	762.389	1	NaN	NaN	NaN	9.37473	NaN	NaN	NaN	8.77928	NaN	NaN	NaN	NaN	NaN	NaN	NaN	NaN	NaN	NaN	NaN	NaN	NaN	10.1865	9.06922	NaN
628	SEDWVK	6	382.185	2	NaN	NaN	NaN	NaN	NaN	7.74354	NaN	NaN	NaN	NaN	NaN	NaN	NaN	NaN	NaN	NaN	NaN	NaN	NaN	NaN	NaN	NaN	6.96738	6.69702
629	LFQEVK	6	382.222	2	NaN	NaN	NaN	8.57117	8.83939	8.82245	NaN	NaN	NaN	NaN	NaN	NaN	8.12624	NaN	NaN	NaN	NaN	NaN	NaN	NaN	NaN	NaN	8.238	7.8437
630	NSFFPR	6	384.196	2	9.00728	9.50158	8.9009	8.61255	9.09172	9.08534	NaN	7.70066	8.41315	8.63185	9.10115	8.79527	NaN	8.90844	8.93325	9.30931	9.58791	9.65941	9.64431	9.4362	8.86555	8.8392	8.82299	8.46205
631	SLGAYEK	7	767.394	1	13.7953	13.9721	13.3736	14.7856	14.2232	14.7405	8.34887	13.9157	13.7612	14.094	13.9985	14.6096	13.599	13.4437	13.322	14.1656	13.577	13.5455	14.3015	14.3811	13.2402	14.2157	13.8643	14.444
632	TSLYGTK	7	769.409	1	10.5059	9.67557	9.75815	9.42146	10.5183	8.40449	NaN	9.01924	NaN	10.3381	NaN	NaN	10.3201	NaN	NaN	10.5371	9.73779	8.94034	NaN	8.22708	7.92932	NaN	10.1589	10.2439
633	LAEPVEL	7	770.43	1	11.831	11.5473	10.6448	11.944	11.4039	11.3337	NaN	12.1137	11.3714	11.6522	NaN	9.97447	11.5542	NaN	11.4581	11.4811	12.2966	11.4708	11.8931	10.2933	11.3785	NaN	10.3972	NaN
634	LGTVVRK	7	386.757	2	7.20901	NaN	NaN	NaN	11.1421	NaN	NaN	11.8395	NaN	9.01725	NaN	NaN	10.0415	NaN	NaN	NaN	9.45487	NaN	NaN	NaN	NaN	NaN	9.06996	11.0903
635	SEYFGNG	7	773.31	1	15.3635	16.0638	NaN	16.6295	16.8435	16.8577	11.5983	16.6322	16.8762	17.121	17.2745	17.1876	14.2586	12.7557	14.7862	16.3379	15.4443	16.2559	16.2087	16.5623	NaN	17.5268	16.6535	16.33
636	TDYFGNG	7	773.31	1	NaN	NaN	14.8434	16.6295	NaN	NaN	NaN	16.6322	16.8762	NaN	17.2745	17.1876	14.2586	8.28586	NaN	16.3379	NaN	16.2559	NaN	NaN	15.2207	NaN	16.6535	16.33
637	MPLFEH	6	387.187	2	8.31358	9.19935	7.94347	10.7919	10.6984	10.5705	NaN	10.5608	10.215	10.0094	9.19865	NaN	9.29608	8.33851	9.57894	9.46733	8.99477	9.45676	10.601	9.47536	10.0209	10.1996	10.1912	9.93991
638	ALLDNLD	7	773.404	1	NaN	12.995	12.2641	14.2717	15.3371	9.18419	8.96188	NaN	14.1489	16.6403	16.8694	17.2527	NaN	8.63164	NaN	15.0495	9.00706	NaN	15.6385	14.9562	13.8942	15.4905	14.599	14.3917
639	SLLEALK	7	387.244	2	NaN	NaN	NaN	NaN	NaN	NaN	NaN	NaN	NaN	NaN	NaN	NaN	NaN	NaN	NaN	NaN	NaN	NaN	NaN	NaN	NaN	NaN	10.0565	9.40625
640	FSVSGDY	7	774.333	1	10.0536	NaN	NaN	11.5873	10.6303	9.66696	NaN	10.2085	11.1276	NaN	NaN	NaN	11.2667	10.6961	11.5795	9.58354	NaN	NaN	11.2765	11.3219	11.3207	NaN	10.1458	NaN
641	AFLSLHS	7	387.712	2	13.0409	12.7527	12.2763	10.959	12.4635	12.0905	7.11095	12.2685	9.07082	13.0584	11.6278	11.5484	12.294	9.68175	NaN	11.9867	12.2786	12.2974	10.4228	11.2505	10.7088	10.4951	12.1361	12.5584
642	NNLSSLK	7	775.432	1	13.5303	13.5663	12.7938	11.532	11.894	11.6889	NaN	11.7148	10.8244	13.2201	11.9889	12.7428	13.3346	11.0124	12.7038	12.107	12.0467	12.3519	12.8723	13.0487	12.4876	11.3749	11.221	11.2094
643	LNSNDLT	7	776.379	1	15.7102	NaN	NaN	14.9734	NaN	NaN	NaN	NaN	NaN	14.6415	NaN	NaN	16.0213	15.8707	15.759	14.0244	NaN	13.743	NaN	15.8125	15.4294	15.0665	13.6313	NaN
644	SLETGDR	7	389.192	2	NaN	NaN	NaN	NaN	NaN	NaN	NaN	8.18695	NaN	NaN	8.58512	8.97892	NaN	NaN	NaN	NaN	NaN	NaN	8.61362	NaN	8.26753	8.62018	8.44347	NaN
645	YSFSFE	6	779.324	1	14.4672	NaN	14.0412	NaN	NaN	NaN	11.2287	NaN	16.0192	NaN	NaN	NaN	14.3703	10.8008	14.2691	NaN	NaN	16.7845	NaN	15.6654	NaN	NaN	17.1433	NaN
646	NYEGSPL	7	779.358	1	10.8034	10.7306	NaN	13.7127	13.7013	13.5262	8.25732	13.261	13.1577	13.0438	13.3499	13.351	NaN	11.6208	11.7378	12.6759	12.3901	12.8719	12.8267	11.0545	11.8279	13.5126	13.0461	NaN
647	GGENAVPH	8	390.687	2	12.0585	NaN	11.7574	9.32097	9.74143	9.69048	NaN	NaN	10.0498	9.9763	11.1051	10.9553	10.1713	11.8756	10.4394	NaN	12.0377	11.2564	11.558	11.6635	10.9542	10.2253	8.87299	NaN
648	QLGVLPR	7	391.749	2	11.0543	11.2614	10.8289	12.3448	12.5009	12.3422	7.0739	11.6042	11.8872	11.5954	11.4504	11.9569	11.1545	11.3754	11.3015	13.0222	12.4334	12.819	12.0447	11.9277	11.5811	12.2074	12.1157	11.8978
649	SLGSYEK	7	392.199	2	NaN	NaN	NaN	NaN	NaN	8.37551	NaN	NaN	NaN	8.50615	NaN	NaN	NaN	NaN	NaN	NaN	NaN	NaN	NaN	NaN	NaN	8.62434	8.18565	NaN
650	QYDSSGQ	7	784.313	1	NaN	10.3761	9.07723	9.31707	NaN	9.50014	NaN	9.1806	9.39011	9.21984	9.13346	NaN	10.4668	NaN	10.5721	9.29331	9.27428	9.34484	10.1831	NaN	9.96729	9.58123	8.72655	8.68447
651	VVADSFF	7	784.385	1	NaN	14.1635	NaN	NaN	14.3928	NaN	NaN	14.2742	13.6102	14.3405	NaN	14.1324	14.0873	13.4994	13.5888	13.7745	NaN	NaN	14.1998	NaN	13.9513	14.099	14.2043	14.2072
652	LLPDDGR	7	393.213	2	10.9005	NaN	10.1606	11.4887	11.2706	11.0797	NaN	10.6921	9.8449	11.0502	NaN	9.7661	11.3759	10.2623	NaN	10.4052	10.2614	10.3115	NaN	10.9979	10.492	NaN	10.6599	10.3057
653	KLAEPVE	7	785.441	1	11.969	11.5252	10.5823	11.2667	11.7704	10.6563	6.6586	11.2203	10.8221	13.983	13.9489	13.6441	9.03493	NaN	NaN	13.0934	12.7044	12.5047	12.5712	10.8431	9.81787	12.3094	11.0833	11.2592
654	QVLNLAK	7	393.248	2	NaN	NaN	NaN	9.53241	10.4711	10.446	NaN	10.7986	NaN	NaN	NaN	NaN	11.5842	NaN	NaN	8.94801	9.34727	8.95765	NaN	NaN	NaN	NaN	9.57565	10.2144
655	NDLALLK	7	393.74	2	11.0472	10.8422	10.3409	12.3045	12.3822	12.3605	7.06271	12.1464	8.14177	11.2128	NaN	NaN	14.5132	9.98354	13.3418	11.2333	11.0793	11.1137	NaN	10.7222	9.54362	9.26427	11.6087	11.5947
656	SSYWGST	7	787.326	1	NaN	NaN	NaN	12.9104	NaN	NaN	8.73042	NaN	7.06868	7.83041	NaN	NaN	NaN	NaN	NaN	NaN	NaN	7.20046	NaN	NaN	NaN	14.2777	13.9011	NaN
657	YPYGYK	6	395.694	2	NaN	NaN	NaN	9.51309	11.3927	11.4199	NaN	10.4996	NaN	9.91776	NaN	NaN	8.50648	NaN	NaN	10.7408	10.229	11.6441	NaN	NaN	NaN	NaN	11.347	11.4076
658	VSVTLSGK	8	395.738	2	9.64335	9.50438	8.65758	8.73536	NaN	8.77175	NaN	9.25682	NaN	NaN	NaN	NaN	9.47512	NaN	8.71868	NaN	9.40173	10.0483	NaN	9.45119	8.98129	9.17828	10.0225	NaN
659	YSFTEF	6	793.34	1	10.6026	NaN	NaN	NaN	12.1139	11.9038	NaN	NaN	NaN	NaN	NaN	NaN	NaN	NaN	NaN	12.7229	NaN	NaN	NaN	NaN	NaN	NaN	12.1385	12.0046
660	FTALLDN	7	793.41	1	10.1979	10.9749	9.69827	11.5123	12.1636	11.8249	NaN	11.1274	11.3731	12.3347	13.0172	14.2528	10.2491	9.26661	NaN	11.7836	NaN	12.0257	12.8709	12.3193	11.5636	11.9895	11.9532	11.7795
661	VLAEHPQ	7	793.421	1	NaN	NaN	NaN	NaN	NaN	NaN	NaN	11.9824	11.7343	NaN	NaN	NaN	NaN	NaN	NaN	NaN	NaN	NaN	NaN	NaN	NaN	NaN	11.6682	11.6114
662	NENALPH	7	397.696	2	NaN	NaN	NaN	7.60853	NaN	8.13019	NaN	NaN	NaN	9.10955	NaN	NaN	9.42601	NaN	9.477	NaN	NaN	NaN	NaN	NaN	NaN	8.21706	7.30385	NaN
663	AYDQGLK	7	397.707	2	12.611	12.7252	12.2044	10.5918	9.66976	9.20454	NaN	7.88717	10.7115	8.66607	10.716	10.7349	12.5561	12.9436	12.8579	10.1262	10.9109	9.53578	11.9271	12.6077	11.8296	10.2103	8.87066	8.68159
664	SGVWFAK	7	397.714	2	NaN	NaN	NaN	11.3552	12.7106	12.7048	NaN	12.6391	NaN	8.06858	NaN	NaN	11.0648	NaN	NaN	10.3393	10.2428	10.8819	NaN	NaN	NaN	NaN	12.3395	12.6137
665	EYDELK	6	398.691	2	NaN	NaN	NaN	7.22557	7.14736	NaN	NaN	NaN	NaN	NaN	NaN	NaN	NaN	NaN	NaN	NaN	NaN	6.77846	NaN	NaN	NaN	NaN	6.91377	6.90004
666	YGSLSSPS	8	797.368	1	NaN	NaN	11.5903	NaN	11.588	11.8289	NaN	11.1449	NaN	12.2538	NaN	10.1427	12.5832	NaN	NaN	12.246	12.5207	NaN	NaN	NaN	NaN	9.78899	11.4893	11.7556
667	NDHGNLK	7	399.2	2	14.0581	14.086	13.8095	13.751	13.603	13.4836	8.92894	12.3612	13.8926	13.3685	13.9048	14.2055	13.72	14.4926	14.1155	13.5346	13.7643	13.7558	14.6004	14.5636	14.1988	13.9299	13.7088	12.8595
668	HEVGLDK	7	399.212	2	NaN	NaN	NaN	NaN	NaN	NaN	NaN	NaN	NaN	NaN	NaN	NaN	NaN	NaN	NaN	NaN	NaN	NaN	NaN	NaN	NaN	9.954	8.90297	8.79796
669	FSFELR	6	399.712	2	NaN	NaN	NaN	8.43331	9.32892	9.08959	NaN	9.71499	NaN	8.02783	NaN	NaN	NaN	NaN	NaN	8.2868	7.94496	9.76739	NaN	NaN	NaN	NaN	8.56939	8.94357
670	YVSSDGTA	8	799.348	1	14.9239	15.5972	14.4626	17.1152	17.0649	17.0387	11.6862	16.6264	16.5059	15.7805	14.8462	14.9263	15.438	14.4146	15.2926	15.3185	14.9835	15.4151	16.4633	16.5341	16.1708	16.5706	16.4898	16.3483
671	HEKWNS	6	400.689	2	10.1738	10.896	NaN	11.453	11.9971	11.6568	NaN	NaN	NaN	11.7674	11.3858	NaN	10.9821	NaN	NaN	NaN	10.5377	NaN	11.6356	NaN	NaN	NaN	11.3418	11.5684
672	LWTNGPL	7	800.429	1	14.8885	15.1895	14.8107	NaN	16.5414	16.1956	10.22	15.2526	15.5388	16.8733	17.203	17.2525	10.4961	14.313	10.3655	16.808	15.8679	16.94	16.5489	16.0138	15.1311	16.5904	16.1549	16.0742
673	EGLTDGPL	8	801.412	1	12.3266	12.6364	12.1957	NaN	13.18	NaN	NaN	12.6038	14.0533	NaN	15.9056	16.0756	NaN	NaN	NaN	14.751	NaN	NaN	14.5221	NaN	13.1117	15.001	13.5857	13.3295
674	LWTDGPL	7	801.412	1	NaN	NaN	NaN	NaN	NaN	NaN	7.95774	NaN	NaN	14.5881	15.9056	NaN	NaN	NaN	NaN	NaN	NaN	14.25	NaN	NaN	NaN	NaN	13.5857	NaN
675	LSLAPDW	7	801.413	1	11.2784	10.9415	11.0222	NaN	NaN	10.949	NaN	NaN	NaN	NaN	NaN	NaN	NaN	11.3779	NaN	10.2415	11.4876	11.0244	NaN	10.788	NaN	10.5249	10.1943	NaN
676	LDLALEK	7	401.24	2	9.40433	9.54495	8.82547	9.15453	9.11359	NaN	NaN	8.51637	NaN	NaN	10.206	NaN	10.0171	NaN	11.0819	9.45404	8.96687	9.09124	9.84778	10.5873	10.5617	9.50372	8.61543	NaN
677	DLGGEALK	8	401.72	2	13.0324	13.1672	12.7181	12.9012	13.1741	13.1976	7.83849	11.5867	11.6293	11.0855	NaN	10.6563	14.2415	14.424	14.4695	11.7785	10.5001	11.557	10.9862	13.0511	12.6505	12.6659	12.6492	12.0863
678	YDFMDL	6	803.327	1	11.0692	11.9095	10.6645	14.0718	14.085	13.7484	7.77573	14.1862	13.915	14.0618	13.5734	14.0698	13.0693	12.3773	13.2491	12.7916	11.5195	12.479	13.7196	12.7562	13.1955	13.5209	13.346	13.3095
679	DLALEKD	7	402.212	2	16.389	16.7603	15.6562	17.089	17.1016	16.8127	12.1687	16.9118	16.6062	16.794	16.8452	16.8323	15.7359	11.4889	12.8755	16.3356	15.7066	16.3829	16.8341	16.8342	15.8115	17.3212	16.9542	16.8171
680	DLALEDK	7	803.416	1	NaN	NaN	NaN	NaN	NaN	16.9261	NaN	16.9128	NaN	NaN	NaN	NaN	15.7693	NaN	NaN	16.1907	NaN	NaN	16.9179	17.0358	NaN	17.4434	16.8664	NaN
681	AYLTLHS	7	402.718	2	12.2501	12.4478	11.7386	NaN	9.43748	9.27518	NaN	9.70458	NaN	11.3566	9.63354	10.6684	9.57581	NaN	NaN	10.0022	10.1509	10.1007	10.5903	10.4323	10.8931	6.64961	8.78642	9.13725
682	AFTHSEN	7	403.179	2	12.8409	12.3452	11.6983	13.0431	12.7641	12.7838	9.05528	12.0598	14.1733	13.5528	13.5109	13.0831	13.4005	13.2558	12.9638	10.7511	8.67723	10.2086	13.2644	13.5233	13.0811	14.1893	12.7209	9.96093
683	ELSDTLK	7	403.22	2	10.3182	10.1616	10.0519	9.06313	10.0301	10.3363	NaN	9.1534	9.80526	10.0824	9.50226	10.2508	10.0379	11.262	10.8933	9.84476	9.71528	9.90275	10.6831	10.848	10.6898	10.1789	9.89607	9.674
684	ALADFLR	7	403.233	2	12.7263	13.0555	12.1897	NaN	11.3034	11.355	6.31222	12.2112	NaN	12.8519	NaN	NaN	12.0246	NaN	NaN	11.9042	13.0779	13.3626	NaN	NaN	NaN	NaN	10.9587	NaN
685	YVDAVLK	7	404.235	2	NaN	NaN	NaN	8.45017	9.13795	8.74543	NaN	NaN	7.58265	NaN	NaN	NaN	NaN	NaN	NaN	7.22974	NaN	NaN	NaN	7.73922	NaN	8.06138	8.44339	8.19865
686	YRELEV	6	404.715	2	NaN	NaN	NaN	NaN	11.8914	12.369	NaN	12.932	NaN	13.7136	13.3519	14.5863	NaN	NaN	NaN	NaN	NaN	NaN	NaN	NaN	NaN	NaN	11.9251	NaN
687	AFDEEAK	7	405.188	2	NaN	NaN	NaN	NaN	NaN	NaN	NaN	8.40655	NaN	9.50381	NaN	8.40372	9.32047	NaN	NaN	NaN	9.75045	9.74295	NaN	10.3475	NaN	9.34616	8.86031	NaN
688	ASSCCAGPD	9	810.277	1	NaN	NaN	12.5421	13.5462	NaN	NaN	NaN	13.0512	NaN	NaN	NaN	13.4672	NaN	NaN	12.7365	NaN	11.8602	NaN	14.0368	14.0398	NaN	NaN	13.3243	NaN
689	FGGNDCPT	8	810.306	1	NaN	NaN	NaN	12.9353	13.3917	12.9705	NaN	NaN	13.0593	NaN	12.2447	NaN	NaN	NaN	NaN	11.7514	NaN	NaN	12.4465	NaN	NaN	NaN	13.2866	13.1112
690	LGEHNLK	7	405.729	2	NaN	NaN	8.81677	NaN	9.00035	9.11322	NaN	7.35507	NaN	8.027	NaN	NaN	8.57378	10.2738	9.28556	NaN	9.1922	NaN	NaN	NaN	8.58012	8.76681	8.59817	NaN
691	LYTWTK	6	406.222	2	NaN	11.2209	10.403	10.7616	9.48417	10.7501	NaN	10.7843	NaN	9.78488	NaN	NaN	8.77385	NaN	NaN	8.9246	9.68192	9.3912	NaN	NaN	NaN	NaN	10.2194	9.98358
692	LLDNLDL	7	815.451	1	12.2942	13.0033	11.7205	14.5493	14.6781	14.2892	8.72519	13.8482	14.1818	14.8092	NaN	14.5691	13.6201	13.4187	14.1788	13.7489	12.894	13.5795	14.8506	NaN	14.4046	14.6665	14.1735	14.0498
693	VQALVTGK	8	408.254	2	NaN	NaN	NaN	11.8282	13.1576	12.5499	7.06532	12.4785	8.24969	12.0081	NaN	9.77676	NaN	NaN	NaN	10.0819	10.5703	10.78	NaN	NaN	NaN	9.09274	10.3283	10.0647
694	FLLLLPT	7	816.523	1	NaN	NaN	NaN	NaN	9.90195	9.40752	NaN	NaN	NaN	NaN	NaN	NaN	NaN	NaN	NaN	NaN	NaN	NaN	NaN	NaN	NaN	8.7222	8.64511	NaN
695	SAQLGDKV	8	409.225	2	8.59344	10.4254	8.69617	11.8731	10.7122	11.699	NaN	11.9461	9.10086	NaN	NaN	NaN	13.5831	NaN	8.55104	NaN	8.47108	8.56967	8.80021	9.22102	10.2473	NaN	8.44825	9.14095
696	LWLDTGL	7	817.445	1	NaN	NaN	NaN	NaN	NaN	NaN	NaN	NaN	NaN	9.08898	NaN	NaN	NaN	9.31037	NaN	NaN	NaN	NaN	NaN	NaN	NaN	9.46813	9.33538	NaN
697	YDFMDL	6	819.324	1	NaN	NaN	NaN	12.8299	12.3208	12.5876	NaN	11.6913	11.6349	11.2038	11.4181	10.9941	NaN	NaN	NaN	NaN	NaN	NaN	NaN	NaN	8.26541	NaN	11.8755	12.2546
698	NFKNPGAA	8	410.205	2	NaN	NaN	NaN	8.48273	8.50545	NaN	NaN	NaN	NaN	NaN	NaN	NaN	NaN	NaN	NaN	NaN	NaN	8.04536	NaN	NaN	NaN	NaN	8.30496	NaN
699	SKLQLGSS	8	819.458	1	10.8819	NaN	NaN	13.0346	12.5449	NaN	8.20896	10.6428	10.5925	12.4526	14.3848	14.1454	11.2672	NaN	NaN	11.4469	NaN	NaN	11.9963	NaN	NaN	11.435	10.8653	10.6134
700	NFKNPEA	7	410.696	2	NaN	NaN	NaN	9.69572	NaN	NaN	NaN	NaN	9.34823	9.86708	9.92278	10.3188	NaN	NaN	NaN	9.62207	9.64024	9.81914	9.65902	NaN	8.33434	10.1142	9.57491	NaN
701	YLLPTVD	7	820.444	1	NaN	8.86784	NaN	NaN	NaN	NaN	NaN	NaN	8.45406	NaN	NaN	NaN	NaN	9.38845	NaN	NaN	NaN	NaN	9.36742	9.30914	NaN	NaN	8.52513	NaN
702	TGHSYEK	7	411.194	2	NaN	NaN	NaN	9.45187	9.72973	9.56236	NaN	9.14207	9.16196	10.7202	10.3285	10.629	10.2374	NaN	9.5898	10.1954	10.2215	10.5808	NaN	10.7641	9.85411	9.46982	9.36988	8.87202
703	SYEGRPL	7	411.212	2	12.8342	13.4829	12.7933	NaN	14.9023	14.8502	10.1628	13.8839	14.4716	NaN	14.9897	14.8441	11.8316	11.3103	11.9066	15.2508	15.1424	15.722	15.2325	14.52	NaN	14.5933	14.5421	14.2473
704	TYNQGLK	7	823.433	1	14.9907	15.402	13.0456	14.9006	14.1197	12.4474	9.38323	10.6063	14.9071	NaN	13.1236	14.7307	15.5033	15.0786	15.6985	14.0504	14.7841	12.3437	14.1805	15.5204	15.064	14.7127	11.2891	12.5072
705	GTLDAGYE	8	825.364	1	11.9381	8.07375	NaN	12.167	12.626	12.2223	7.20414	12.0955	11.9297	13.6346	14.1719	13.7876	11.3607	NaN	11.5455	12.8299	12.8415	13.0167	NaN	13.1975	NaN	13.1126	12.5085	12.2511
706	TGLDAGYE	8	413.188	2	NaN	NaN	10.8399	NaN	NaN	NaN	NaN	NaN	NaN	8.92847	9.56921	9.33434	NaN	NaN	NaN	NaN	NaN	8.77702	NaN	NaN	NaN	NaN	8.37907	NaN
707	YNNWET	6	826.338	1	NaN	NaN	NaN	NaN	NaN	13.042	NaN	NaN	NaN	NaN	NaN	NaN	12.9895	NaN	NaN	NaN	NaN	13.731	NaN	NaN	NaN	13.01	12.4534	NaN
708	FLSHLPL	7	413.746	2	8.44695	9.10733	8.32428	7.00882	6.76749	NaN	NaN	5.97314	NaN	7.88246	6.81993	6.81259	8.63228	7.33502	7.85712	7.3333	8.02526	7.37134	8.95239	9.13175	9.14207	NaN	6.60752	NaN
709	VYVSSDGT	8	827.379	1	14.2021	13.8263	12.9382	14.2305	14.2925	13.8294	8.81308	13.9523	13.8433	15.6227	15.5516	15.497	13.4427	12.5787	13.203	14.5617	13.0191	13.3995	13.8614	14.0788	12.3207	15.5761	14.5534	14.2097
710	LLDLGVAK	8	414.764	2	NaN	NaN	NaN	9.90848	9.99552	9.91794	NaN	9.22887	NaN	NaN	NaN	NaN	NaN	NaN	NaN	NaN	NaN	NaN	NaN	NaN	NaN	NaN	9.39285	9.20546
711	YTYGPGAT	8	829.374	1	NaN	NaN	NaN	11.6909	12.0959	12.1453	NaN	10.9347	11.4892	11.471	12.396	11.8797	NaN	NaN	NaN	12.4681	12.8923	13.2612	12.6643	12.0915	11.7033	11.6056	11.5778	11.3041
712	TYYGPGAT	8	415.192	2	NaN	NaN	NaN	NaN	NaN	NaN	NaN	NaN	NaN	NaN	8.96708	NaN	NaN	NaN	NaN	NaN	NaN	NaN	9.04835	NaN	8.22841	NaN	8.45685	7.97248
713	LQALVTGK	8	415.263	2	NaN	NaN	NaN	NaN	NaN	NaN	NaN	NaN	NaN	NaN	NaN	NaN	NaN	NaN	NaN	NaN	NaN	NaN	NaN	NaN	NaN	9.63921	10.5742	10.6079
714	LDNLDLK	7	415.736	2	NaN	NaN	NaN	NaN	9.8974	9.728	NaN	9.10328	9.73811	8.50384	NaN	9.57838	NaN	NaN	NaN	9.05238	8.77359	9.81315	10.0084	NaN	NaN	NaN	9.96091	9.63993
715	FAEVLEK	7	418.233	2	9.69476	10.0207	9.23334	8.67673	10.5617	10.3301	NaN	10.2751	9.64809	10.501	8.61427	10.9004	9.75944	NaN	9.60932	NaN	9.53161	NaN	NaN	10.3832	10.0611	10.517	10.0106	9.87681
716	TYNLVTK	7	419.739	2	NaN	NaN	NaN	NaN	NaN	NaN	NaN	NaN	NaN	NaN	NaN	NaN	NaN	NaN	NaN	NaN	NaN	NaN	NaN	NaN	NaN	NaN	8.4421	9.12469
717	VLDKLHN	7	419.744	2	NaN	NaN	NaN	7.33833	7.84663	7.57463	NaN	6.70409	6.90622	NaN	NaN	NaN	9.98997	NaN	NaN	6.84663	NaN	NaN	NaN	NaN	NaN	NaN	6.79193	NaN
718	TSAFLDW	7	839.393	1	12.7466	13.3808	12.5254	12.6018	13.1441	13.2495	NaN	11.9732	12.1637	12.24	12.4893	12.304	12.9377	12.129	12.7016	13.5799	12.9982	13.6464	12.7823	13.2867	11.9579	13.0902	13.0781	13.0329
719	YLNTGDAS	8	840.375	1	NaN	11.8621	10.6622	NaN	NaN	NaN	NaN	9.87832	9.59379	10.3558	10.614	NaN	11.9652	11.3742	12.1937	10.5761	NaN	NaN	11.8183	12.187	11.7007	NaN	9.48626	9.60129
720	LYVSSDGT	8	841.395	1	NaN	NaN	NaN	9.67732	9.93258	9.43197	NaN	8.81494	NaN	9.5528	10.2843	10.3267	NaN	NaN	NaN	9.3947	NaN	NaN	9.3702	8.83365	NaN	10.7135	9.86008	9.45233
721	TNGPLPDK	8	421.225	2	14.4748	14.5079	14.4029	14.6535	14.6468	14.5836	9.77375	13.0008	14.5013	13.189	13.4829	14.1798	13.3348	15.4565	14.8712	13.9808	14.3229	14.4252	15.0365	14.9715	15.1424	14.6041	14.016	12.1044
722	TNGPLPNK	8	841.443	1	13.8569	NaN	NaN	NaN	NaN	NaN	NaN	NaN	NaN	NaN	NaN	NaN	NaN	15.4565	NaN	NaN	NaN	NaN	NaN	14.1562	NaN	NaN	12.4616	12.1044
723	EYFGNGR	7	421.695	2	NaN	NaN	NaN	11.7162	12.3009	12.216	NaN	11.4828	NaN	8.42988	NaN	NaN	10.1146	NaN	NaN	9.21326	8.90724	9.68362	NaN	NaN	NaN	NaN	11.6559	11.6848
724	CGVMSFAK	8	421.706	2	NaN	NaN	NaN	NaN	7.52604	7.65814	NaN	7.37976	NaN	NaN	NaN	NaN	NaN	NaN	NaN	NaN	NaN	NaN	NaN	NaN	NaN	NaN	7.24597	7.49439
725	TNGPLPDK	8	421.718	2	9.95254	10.166	NaN	10.5222	NaN	9.02503	NaN	7.67083	11.0152	NaN	NaN	NaN	NaN	11.9178	11.5465	NaN	9.44567	9.81066	11.5179	10.6824	11.1158	11.3732	9.5135	NaN
726	EYFGDGR	7	422.187	2	NaN	NaN	NaN	10.7867	10.5037	10.402	NaN	9.97462	9.46529	NaN	NaN	NaN	NaN	NaN	NaN	NaN	NaN	NaN	NaN	NaN	NaN	10.2934	10.2859	10.1364
727	QYELYK	6	422.217	2	NaN	NaN	NaN	9.8266	NaN	NaN	7.30679	9.83193	NaN	NaN	NaN	NaN	NaN	NaN	NaN	NaN	NaN	NaN	NaN	NaN	NaN	NaN	12.6976	NaN
728	KNVTGGPDG	9	844.406	1	NaN	NaN	NaN	NaN	12.3857	NaN	NaN	10.421	NaN	NaN	13.8522	NaN	NaN	NaN	NaN	NaN	NaN	NaN	14.4481	NaN	13.924	NaN	11.9547	NaN
729	APGATQSGR	9	422.719	2	9.50474	8.95418	NaN	NaN	NaN	10.9807	NaN	10.6124	NaN	9.46933	NaN	NaN	13.5605	10.1975	12.1363	9.93207	NaN	NaN	NaN	NaN	NaN	NaN	10.149	10.0026
730	GYGSCCQK	8	423.17	2	7.54287	NaN	NaN	7.84387	8.35176	8.22083	NaN	NaN	NaN	NaN	NaN	NaN	9.28253	NaN	NaN	NaN	NaN	NaN	NaN	NaN	NaN	NaN	7.41692	NaN
731	NGQYAVHG	8	423.2	2	7.29225	NaN	NaN	NaN	8.67164	8.96521	NaN	8.41084	NaN	9.84588	NaN	NaN	NaN	NaN	NaN	9.17581	8.42401	NaN	NaN	NaN	NaN	NaN	8.56104	NaN
732	LSADLNNV	8	423.23	2	NaN	9.50784	NaN	NaN	9.34679	NaN	NaN	NaN	NaN	NaN	10.0287	NaN	NaN	NaN	NaN	10.3792	9.02976	NaN	NaN	9.7849	NaN	9.15723	9.60554	NaN
733	KVFKNNP	7	423.746	2	NaN	NaN	NaN	6.45002	NaN	NaN	NaN	NaN	NaN	NaN	NaN	NaN	NaN	NaN	NaN	NaN	NaN	NaN	NaN	NaN	NaN	NaN	6.81914	6.91573
734	EHTLNHP	7	424.208	2	NaN	NaN	NaN	NaN	NaN	12.1915	NaN	12.2219	12.3828	12.8238	12.6365	13.1185	NaN	NaN	NaN	NaN	11.3041	NaN	12.9162	NaN	12.3525	12.2211	11.9479	NaN
735	VLGEYDR	7	426.217	2	9.75441	NaN	9.38819	10.9098	10.0383	10.5975	NaN	9.24462	NaN	10.5818	NaN	10.3242	10.7728	11.7475	11.7674	NaN	8.66893	NaN	NaN	10.482	11.5029	10.154	10.6648	9.69965
736	GFSGLDQK	8	426.218	2	NaN	8.82307	8.97155	NaN	8.38122	8.59875	NaN	NaN	NaN	NaN	NaN	NaN	NaN	NaN	NaN	NaN	9.03601	9.82917	NaN	NaN	NaN	NaN	8.36182	NaN
737	SSGVNYPE	8	426.692	2	NaN	NaN	7.94393	NaN	8.14072	NaN	NaN	NaN	NaN	7.29003	NaN	NaN	NaN	NaN	NaN	7.85204	NaN	NaN	7.87984	8.86326	NaN	11.1965	7.8768	7.77299
738	DFYVLPV	7	426.729	2	NaN	NaN	NaN	NaN	8.28528	8.43184	NaN	NaN	NaN	9.42556	NaN	NaN	NaN	NaN	NaN	8.99872	8.93176	NaN	NaN	NaN	NaN	NaN	8.62128	NaN
739	VSAYLDW	7	853.409	1	10.9559	12.5413	10.3376	NaN	12.4505	13.9011	NaN	13.4467	NaN	13.7055	9.152	NaN	6.64132	NaN	NaN	13.7236	12.587	13.8177	NaN	NaN	NaN	NaN	12.9843	14.0614
740	EFVTHPK	7	429.229	2	8.99071	NaN	8.77945	8.73366	8.19375	8.39792	NaN	7.48342	8.86876	7.93989	8.70683	8.82149	NaN	NaN	NaN	8.07633	7.99397	7.96954	9.66801	NaN	9.04078	9.23687	8.22222	7.64466
741	LALLFANP	8	858.508	1	NaN	NaN	NaN	8.49502	9.0797	NaN	NaN	NaN	7.26648	NaN	NaN	NaN	NaN	NaN	NaN	NaN	NaN	NaN	NaN	NaN	NaN	NaN	8.49816	NaN
742	SSQYFGNG	8	430.676	2	NaN	8.91732	NaN	NaN	NaN	NaN	NaN	NaN	8.07888	NaN	7.91628	NaN	8.7607	NaN	NaN	NaN	NaN	NaN	NaN	NaN	NaN	NaN	8.53057	7.767
743	SSEYFGNG	8	860.344	1	11.9986	12.6652	NaN	NaN	11.8765	8.55501	NaN	NaN	10.839	12.5911	12.0123	11.7959	11.9064	NaN	11.384	NaN	10.6918	10.8625	9.31154	11.81	NaN	12.0811	11.7331	11.5413
744	LLTFGEDA	8	865.446	1	NaN	NaN	NaN	9.02017	8.93373	8.37714	NaN	9.26853	8.63624	7.5803	8.09332	8.00867	NaN	NaN	NaN	8.95016	7.44	8.08234	NaN	NaN	NaN	9.53597	8.83207	8.59626
745	LGTFDSGGL	9	866.426	1	NaN	NaN	NaN	NaN	NaN	NaN	NaN	NaN	9.41153	NaN	NaN	8.56475	9.29776	7.54942	NaN	NaN	NaN	NaN	10.3817	NaN	NaN	9.3711	9.27977	9.54013
746	FVFLGALT	8	867.498	1	NaN	NaN	NaN	NaN	NaN	NaN	NaN	NaN	NaN	NaN	NaN	NaN	NaN	NaN	NaN	NaN	NaN	NaN	NaN	NaN	NaN	8.93052	8.81682	8.81003
747	TSLQYEK	7	434.726	2	NaN	NaN	NaN	NaN	NaN	NaN	NaN	NaN	NaN	NaN	NaN	7.06067	NaN	NaN	NaN	NaN	NaN	NaN	NaN	NaN	NaN	7.00444	6.23466	NaN
748	SWVHQLV	7	434.738	2	9.60536	11.5364	NaN	NaN	NaN	NaN	7.23732	12.63	11.4803	NaN	NaN	NaN	14.0992	NaN	12.9576	9.28272	10.3025	9.77793	11.4977	NaN	NaN	NaN	11.4608	11.1436
749	LLPWDPK	7	434.751	2	14.0535	14.2585	13.5103	11.4375	11.7935	12.138	NaN	10.3142	11.0809	11.4	12.3868	12.183	13.6164	13.7548	14.059	12.8662	13.7463	13.038	14.4938	14.5941	14.6447	12.676	12.1456	11.8809
750	LWTNGPLA	8	871.466	1	14.719	15.8254	NaN	16.2101	16.1244	15.9527	10.0699	15.8127	15.3059	15.8344	15.2426	15.1547	NaN	14.8254	16.0525	15.9989	15.2553	16.0503	16.7517	16.196	16.4159	15.9136	15.6539	15.5905
751	TALKTPDK	8	437.256	2	10.2121	NaN	NaN	10.269	10.4654	9.84619	NaN	10.2283	10.0313	NaN	NaN	11.9506	NaN	NaN	NaN	8.81445	10.5299	11.4018	NaN	10.8025	NaN	10.9767	9.79304	9.84455
752	STGGDNRAP	9	437.706	2	8.84254	8.68395	8.49297	7.9641	7.99411	7.5602	NaN	NaN	8.29128	7.67211	9.39446	8.99952	8.24976	9.77582	9.23469	8.53098	7.97214	8.35278	9.47088	9.1883	8.59665	8.6175	7.48959	7.20989
753	LGGLTGTAGK	10	437.754	2	NaN	NaN	NaN	NaN	NaN	NaN	NaN	NaN	NaN	NaN	NaN	NaN	NaN	NaN	NaN	NaN	NaN	NaN	NaN	NaN	NaN	7.79021	8.4645	NaN
754	NWGEGWK	7	438.705	2	NaN	NaN	NaN	NaN	NaN	NaN	NaN	NaN	NaN	NaN	NaN	NaN	10.7909	NaN	NaN	NaN	10.0979	NaN	NaN	10.795	NaN	10.737	10.0048	NaN
755	LFQEVLK	7	438.764	2	NaN	NaN	9.06188	11.0222	11.0746	11.0306	NaN	9.67338	9.09469	8.73534	NaN	NaN	10.8404	11.0257	10.9484	9.35497	9.67852	9.49873	NaN	10.9729	10.6073	10.1877	10.4089	10.0797
756	EFLNKLD	7	439.736	2	NaN	NaN	NaN	NaN	NaN	NaN	NaN	7.81574	7.30599	8.20012	7.72849	8.43549	NaN	NaN	NaN	NaN	NaN	NaN	NaN	NaN	NaN	7.48069	7.19776	NaN
757	VGGENAVPH	9	440.221	2	11.8999	11.2629	11.6631	9.05238	9.66877	9.68617	NaN	8.11201	9.87629	9.84135	11.0539	10.9286	9.61022	11.3213	9.64461	10.4921	NaN	11.1268	11.6151	11.4925	10.9383	10.148	8.8082	NaN
758	PFLFQEV	7	879.461	1	8.91832	10.1573	8.72035	NaN	11.2044	NaN	NaN	NaN	11.5673	9.22524	9.56942	9.84823	NaN	10.7627	12.6291	NaN	NaN	NaN	NaN	10.9324	11.438	12.2009	11.1675	10.6448
759	VQLGVLPGV	9	441.283	2	NaN	16.1467	15.4759	16.6454	NaN	14.6777	11.7738	14.1737	16.2455	15.1516	16.3987	16.739	15.9975	15.5626	15.8692	14.8145	13.9533	13.7007	17.4021	17.1892	16.979	16.971	15.0411	13.8971
760	VQLGVLPR	8	441.283	2	15.9204	16.1467	15.4759	16.6454	15.5254	14.6777	11.7738	14.1737	16.2455	15.1516	16.3987	NaN	NaN	NaN	15.8692	14.8145	13.9533	13.7007	17.4021	NaN	16.979	16.971	15.0411	13.8971
761	TLEELYD	7	882.409	1	15.8387	16.3977	15.077	16.4854	16.628	16.0676	11.193	16.2374	16.1457	17.7997	17.2902	17.4183	16.2186	15.2594	16.2953	16.9366	15.8909	16.5752	17.4882	16.9017	17.0781	16.5325	15.9761	15.9112
762	LTSLYGTK	8	441.752	2	NaN	NaN	NaN	11.4395	13.2985	13.2943	NaN	13.8814	NaN	13.1143	NaN	NaN	NaN	NaN	NaN	13.1591	12.8201	13.8887	NaN	NaN	NaN	NaN	13.1152	13.4993
763	SFSFELR	7	443.228	2	11.9251	11.8922	NaN	13.6396	14.082	13.5372	8.29861	13.7207	NaN	12.8704	NaN	NaN	13.705	NaN	NaN	12.2534	12.6996	13.1134	NaN	NaN	NaN	NaN	13.0571	13.3297
764	LAQLATLR	8	443.281	2	NaN	NaN	NaN	NaN	NaN	NaN	NaN	NaN	NaN	NaN	NaN	NaN	NaN	NaN	NaN	NaN	NaN	NaN	NaN	NaN	NaN	NaN	7.91088	7.85001
765	LALDNLDL	8	886.487	1	13.7762	14.3571	11.407	15.6157	NaN	15.3144	7.84173	15.0134	NaN	16.5166	15.8808	14.2708	14.9781	14.6281	15.3439	15.2092	14.0751	14.8259	14.2118	NaN	15.6301	NaN	15.165	15.1151
766	ALLDNLDL	8	443.748	2	NaN	14.3571	12.9644	15.6157	NaN	13.493	NaN	NaN	NaN	16.5166	15.8808	14.2708	14.9781	14.6281	NaN	15.2092	14.0751	NaN	NaN	NaN	NaN	15.7685	13.3746	NaN
767	GVNGLLNAK	9	443.755	2	NaN	NaN	NaN	NaN	NaN	NaN	NaN	NaN	NaN	NaN	NaN	NaN	NaN	NaN	NaN	NaN	NaN	NaN	NaN	NaN	NaN	NaN	10.3477	10.2252
768	EGLTNGPLS	9	887.461	1	NaN	11.2257	NaN	NaN	NaN	11.838	NaN	NaN	10.9233	NaN	11.7638	NaN	NaN	NaN	NaN	11.8238	11.6249	NaN	NaN	11.9341	NaN	NaN	11.5116	11.3396
769	LWTNGPLS	8	444.236	2	10.6504	NaN	NaN	11.5066	12.1184	NaN	NaN	NaN	NaN	11.1034	NaN	11.5609	NaN	NaN	NaN	NaN	NaN	12.4478	NaN	9.21774	NaN	11.6475	9.19123	8.66056
770	WSPWQVS	7	445.215	2	NaN	NaN	NaN	9.10487	9.13198	NaN	NaN	NaN	NaN	8.05842	NaN	NaN	NaN	NaN	9.48839	NaN	9.42286	NaN	9.03056	NaN	NaN	8.19782	8.56945	8.64491
771	DLGGEALKS	9	445.23630000000003	2	NaN	NaN	NaN	9.58152	9.26053	8.58045	NaN	10.4826	NaN	9.03424	8.53569	7.93677	10.6066	NaN	NaN	8.55536	NaN	NaN	NaN	NaN	NaN	7.42701	7.96051	9.13591
772	FTHSENR	7	445.711	2	10.7424	9.91462	9.71008	12.5412	12.2129	8.50221	6.90745	NaN	NaN	10.6413	NaN	NaN	12.6412	NaN	NaN	6.11231	9.0175	6.51155	NaN	NaN	NaN	NaN	11.6861	7.0108
773	NDPYQVR	7	446.221	2	14.0209	13.646	12.9262	13.521	13.2844	13.4274	8.8186	11.7092	9.84832	13.5602	NaN	NaN	14.8575	NaN	9.75466	13.1029	NaN	13.6971	9.42167	12.1132	11.0559	10.4857	13.6032	13.4046
774	YSFSFEL	7	892.409	1	NaN	9.08029	NaN	11.225	9.95822	10.5752	NaN	11.1603	7.78769	8.91942	NaN	NaN	11.4033	NaN	9.84723	10.4598	NaN	8.61488	NaN	NaN	9.02914	NaN	9.07727	9.57388
775	SANPETFK	8	447.715	2	NaN	NaN	NaN	10.7243	11.0334	NaN	NaN	NaN	NaN	NaN	NaN	NaN	NaN	NaN	NaN	NaN	NaN	NaN	NaN	NaN	NaN	NaN	8.67085	NaN
776	EGNYLNSV	8	448.712	2	NaN	10.5704	NaN	NaN	NaN	NaN	NaN	NaN	8.08286	10.5099	NaN	9.43727	NaN	NaN	NaN	NaN	NaN	NaN	NaN	NaN	NaN	NaN	8.6524	NaN
777	VSNYLDW	7	896.414	1	11.8992	13.2185	9.07148	8.11048	9.26759	12.2296	NaN	9.84309	NaN	NaN	10.3675	11.5174	10.4867	NaN	12.1539	9.8458	NaN	10.0763	11.4716	12.5459	8.03358	11.6239	11.3936	9.25035
778	LVVHQDW	7	448.736	2	9.16723	8.78506	8.39342	9.05929	8.95871	8.66881	NaN	NaN	9.50123	10.4624	11.1002	11.1318	9.88966	11.7797	11.339	NaN	NaN	NaN	10.4623	9.92329	9.59763	10.8885	9.8465	9.31052
779	YFVEVLK	7	449.258	2	NaN	NaN	NaN	9.7892	10.2975	10.1935	NaN	9.89181	NaN	7.06415	NaN	NaN	11.6882	NaN	8.59011	9.18661	9.77006	9.61447	NaN	NaN	NaN	NaN	10.0037	10.2079
780	VYVSSDGTA	9	898.416	1	14.0963	14.2284	12.9471	14.9088	14.5647	14.589	8.61419	14.8381	13.6672	14.0417	12.0786	12.1	16.3343	11.3436	15.5989	13.3799	12.4095	11.1753	13.5601	14.4538	13.4949	14.3633	14.0382	13.9832
781	SFTFELR	7	450.235	2	12.3528	12.9492	11.9851	10.9269	11.8492	11.5599	NaN	12.2047	NaN	12.6087	NaN	NaN	11.7438	NaN	NaN	11.0621	12.3982	12.2278	NaN	NaN	NaN	NaN	11.0844	11.4348
782	VDFVNDHG	8	451.706	2	NaN	9.10487	NaN	9.69875	10.3437	NaN	NaN	10.1045	NaN	12.4051	14.3714	14.1042	NaN	NaN	NaN	11.5712	10.0263	NaN	11.7278	NaN	NaN	11.9348	11.1941	10.9864
783	VELDLGGEA	9	902.447	1	NaN	15.8776	14.9966	NaN	NaN	15.5844	NaN	14.7913	NaN	14.898	15.3283	NaN	14.7372	15.4649	NaN	15.5699	15.2251	15.64	NaN	16.4893	15.9377	16.227	15.5684	15.4773
784	LYPYGYK	7	452.236	2	NaN	NaN	NaN	NaN	13.2925	13.4289	NaN	12.6291	NaN	11.9545	NaN	NaN	NaN	NaN	NaN	12.8896	12.5668	13.9203	NaN	NaN	NaN	NaN	13.1131	13.5572
785	LFQEVLR	7	452.767	2	NaN	NaN	NaN	NaN	NaN	9.2887	NaN	NaN	NaN	NaN	NaN	NaN	NaN	NaN	NaN	NaN	NaN	NaN	NaN	NaN	NaN	NaN	8.70086	8.42364
786	VTVTSERN	8	453.239	2	NaN	NaN	NaN	NaN	NaN	8.43257	NaN	NaN	NaN	NaN	7.08404	NaN	NaN	NaN	NaN	NaN	NaN	NaN	NaN	NaN	NaN	NaN	8.66558	8.88718
787	KYSFSFE	7	454.214	2	NaN	NaN	NaN	11.2725	11.9744	11.6587	NaN	11.793	NaN	12.1599	11.0383	10.271	NaN	NaN	NaN	11.8276	NaN	11.7766	NaN	NaN	NaN	10.3635	12.1149	12.1462
788	SSYEGRPL	8	454.728	2	12.7007	13.3829	NaN	14.0067	14.2297	14.1851	9.33446	13.4228	13.1796	13.9829	14.1056	13.8183	NaN	NaN	NaN	14.4763	14.38	14.9303	13.1385	NaN	NaN	NaN	14.0103	13.7748
789	SSYEGRLP	8	454.728	2	NaN	NaN	12.7088	NaN	NaN	NaN	NaN	NaN	NaN	13.9829	14.1056	NaN	NaN	NaN	11.685	NaN	NaN	14.9303	NaN	13.5918	NaN	13.6249	14.0103	13.7748
790	YGFLLPAK	8	454.766	2	NaN	NaN	NaN	NaN	7.88226	8.01461	NaN	NaN	NaN	NaN	NaN	NaN	NaN	NaN	NaN	NaN	NaN	NaN	NaN	NaN	NaN	NaN	NaN	NaN
791	AVLDKLHN	8	455.262	2	9.83404	10.8955	9.63738	11.39	NaN	NaN	NaN	10.8742	10.7494	10.0669	NaN	NaN	12.7862	NaN	10.3461	NaN	11.1114	11.5185	NaN	11.5692	NaN	10.7795	10.6884	NaN
792	TAFDEEAK	8	455.713	2	8.06721	10.1473	NaN	NaN	NaN	NaN	NaN	8.15307	NaN	9.37161	NaN	NaN	10.7088	8.73958	10.7921	8.20696	NaN	8.33515	9.0227	NaN	10.0022	NaN	9.0333	NaN
793	YFLEVLK	7	456.265	2	NaN	NaN	NaN	10.2081	10.5776	10.4828	NaN	10.0883	NaN	NaN	NaN	NaN	11.6273	NaN	NaN	NaN	9.96779	9.62446	NaN	NaN	NaN	NaN	10.2664	10.5071
794	LLEGTNGPL	9	457.262	2	NaN	NaN	NaN	NaN	NaN	NaN	NaN	NaN	NaN	NaN	NaN	NaN	NaN	NaN	NaN	NaN	8.25601	9.47345	NaN	NaN	NaN	NaN	8.97597	NaN
795	KLPENNAE	8	457.733	2	13.9278	13.6549	13.3362	11.0947	11.4244	10.8653	NaN	NaN	11.9298	12.4565	13.577	13.8351	NaN	12.3914	10.0463	12.1146	13.1543	NaN	14.5547	14.3444	13.1949	12.4328	10.7009	10.3303
796	LSVGGGGVTPA	11	914.495	1	NaN	16.8224	NaN	NaN	NaN	14.9263	NaN	NaN	NaN	NaN	16.1218	15.2224	NaN	NaN	NaN	NaN	NaN	15.5028	NaN	17.0773	NaN	NaN	14.4015	NaN
797	LDLGGEALK	9	458.262	2	12.0366	12.4469	11.7178	12.0084	12.234	12.1794	NaN	11.2249	10.4714	10.366	NaN	NaN	13.5848	13.0867	13.6073	10.8526	10.4861	10.5869	NaN	12.7369	11.8164	11.634	11.6473	11.5349
798	VVGGTEAQGV	10	458.747	2	13.1343	12.0096	12.0332	13.8161	14.9632	NaN	NaN	14.9315	NaN	13.9402	NaN	NaN	NaN	NaN	NaN	13.9183	15.2824	15.4987	NaN	NaN	NaN	NaN	14.0958	14.9997
799	LDLALEKD	8	458.753	2	13.3468	13.811	12.6796	13.6961	13.6215	12.9928	8.89076	13.8353	13.7261	14.0459	13.742	14.195	11.7989	NaN	NaN	13.5133	13.5733	13.2328	13.9482	13.6885	12.9642	13.5387	12.696	12.6453
800	NFVNDHGN	8	459.193	2	10.4602	10.5728	10.2434	9.69886	NaN	NaN	NaN	NaN	11.0582	NaN	12.3	11.8979	NaN	NaN	NaN	9.46657	9.88421	10.0548	NaN	11.4719	NaN	10.9031	9.06852	NaN
801	LDWLDQK	7	459.241	2	NaN	17.0947	16.3649	17.0725	16.5479	15.6903	11.8943	14.7647	15.7308	16.1859	NaN	16.573	17.5964	16.7428	17.5454	16.1998	NaN	14.8204	16.4731	16.9935	16.9551	NaN	15.568	NaN
802	LFLLAGHM	8	459.25	2	8.09468	9.06938	NaN	NaN	NaN	NaN	NaN	8.02471	NaN	NaN	NaN	NaN	NaN	NaN	NaN	NaN	NaN	NaN	NaN	NaN	NaN	NaN	7.57041	NaN
803	NSWPSQLS	8	918.433	1	13.8862	13.0953	12.4161	12.4605	13.418	12.704	8.5127	13.4865	11.404	13.8897	14.6894	NaN	11.8629	NaN	NaN	14.0275	13.1937	13.7622	13.9627	NaN	12.096	12.6252	12.884	12.7368
804	NDDWQLK	7	459.722	2	NaN	NaN	NaN	NaN	NaN	9.49564	NaN	NaN	NaN	NaN	NaN	NaN	NaN	NaN	NaN	NaN	NaN	NaN	NaN	NaN	NaN	NaN	9.16841	9.40249
805	LSSNSAEDP	9	919.401	1	15.411	NaN	14.4694	NaN	NaN	14.0834	NaN	NaN	14.293	16.188	NaN	NaN	NaN	14.8097	NaN	15.2489	NaN	14.6709	NaN	15.4532	13.5961	16.0136	14.9245	NaN
806	AVLNKDTGT	9	460.241	2	NaN	NaN	NaN	9.25845	NaN	NaN	NaN	NaN	NaN	NaN	NaN	NaN	NaN	NaN	NaN	NaN	NaN	9.4582	NaN	NaN	NaN	10.1273	9.14251	NaN
807	LYVDAVLK	8	460.777	2	NaN	NaN	NaN	NaN	9.13896	8.88272	NaN	8.49144	NaN	8.63509	NaN	NaN	9.35445	NaN	9.85147	NaN	NaN	NaN	NaN	NaN	NaN	NaN	8.68287	NaN
808	TTGHSYEK	8	461.719	2	13.137	13.1524	12.4988	11.7854	12.0732	11.8843	6.99451	11.5193	11.4978	13.1097	12.6816	13.0488	12.8773	10.8898	12.1463	12.6979	12.6253	12.9919	13.0498	13.4641	12.3805	11.6796	11.6816	11.3161
809	LEKDYVR	7	461.755	2	NaN	NaN	NaN	NaN	11.0476	10.9683	NaN	11.2961	NaN	9.58443	NaN	NaN	NaN	NaN	NaN	NaN	NaN	9.77429	NaN	NaN	NaN	NaN	10.0406	10.9997
810	SLFGNEGNS	9	462.708	2	12.7422	12.6757	11.5033	12.4758	12.3652	12.8298	NaN	12.6218	12.7057	13.476	14.2656	14.1156	12.5743	NaN	13.7266	12.9873	12.9261	NaN	14.6533	13.2808	13.2871	NaN	12.5444	12.7517
811	LSFGNEGNS	9	462.708	2	NaN	NaN	NaN	12.4758	NaN	NaN	8.1408	12.6218	NaN	13.476	NaN	NaN	12.2803	NaN	NaN	NaN	12.6382	12.9292	NaN	NaN	NaN	NaN	12.5444	NaN
812	DGETFEVK	8	462.72	2	NaN	NaN	NaN	9.1573	8.82944	NaN	NaN	8.65868	NaN	8.4878	NaN	NaN	NaN	NaN	NaN	NaN	NaN	NaN	NaN	NaN	NaN	NaN	8.47791	8.45068
813	SSYFPEPV	8	925.43	1	10.3989	9.15557	10.0189	9.6699	9.84278	9.45829	NaN	NaN	NaN	NaN	9.68849	11.2921	NaN	9.97891	8.76194	9.4646	9.77757	NaN	NaN	11.3977	11.163	11.8205	11.4963	NaN
814	YGFLLPES	8	925.466	1	14.5408	NaN	14.3035	14.1242	14.8684	NaN	NaN	NaN	14.1956	15.7638	16.3541	NaN	13.3719	NaN	NaN	15.9453	16.1036	16.3941	15.6301	15.5188	NaN	15.1868	14.861	NaN
815	SYWGSTVK	8	464.234	2	NaN	NaN	NaN	NaN	12.1009	11.7504	NaN	10.5092	NaN	NaN	NaN	NaN	NaN	NaN	NaN	10.6392	10.4437	NaN	NaN	NaN	NaN	NaN	11.4077	10.8823
816	EGLNTGLHS	9	464.73	2	NaN	13.8113	13.3468	14.617	14.8664	NaN	10.0932	13.5656	NaN	13.5863	14.4457	14.6196	NaN	NaN	NaN	NaN	14.827	15.0686	15.5392	NaN	NaN	14.2512	14.3012	13.7108
817	SEYFGNGR	8	465.211	2	12.1991	12.0072	11.2946	16.2944	17.0228	16.9296	11.2949	16.8484	NaN	14.343	NaN	NaN	15.4595	NaN	NaN	14.7166	14.2769	14.9747	NaN	12.0773	NaN	11.4618	16.6021	16.7534
818	SEYFGDVN	8	465.703	2	NaN	NaN	NaN	15.4769	15.4065	15.1921	10.4173	15.2734	14.1215	13.1493	NaN	NaN	13.9328	NaN	14.0952	13.9884	NaN	13.3121	NaN	NaN	NaN	15.185	15.2815	NaN
819	SEYMGTLN	8	465.703	2	11.0412	NaN	NaN	NaN	NaN	NaN	NaN	15.2734	NaN	13.1493	NaN	NaN	NaN	NaN	NaN	13.9884	12.6038	13.3121	NaN	12.1273	NaN	NaN	15.2815	15.2124
820	SEYFGDGR	8	465.703	2	NaN	NaN	NaN	15.4769	15.4065	15.1921	NaN	15.2734	14.1215	NaN	11.4117	NaN	NaN	NaN	14.0952	NaN	NaN	NaN	NaN	NaN	NaN	15.185	15.2815	15.2124
821	LWENLQK	7	465.757	2	9.83475	9.96367	9.57986	10.2519	10.4245	NaN	NaN	10.0098	NaN	NaN	NaN	NaN	NaN	NaN	NaN	NaN	NaN	NaN	NaN	NaN	NaN	NaN	10.2691	10.4249
822	YDFMDLK	7	466.216	2	NaN	NaN	NaN	9.12837	9.39074	8.6429	NaN	9.04413	9.05399	9.09631	8.43847	9.4921	NaN	NaN	NaN	NaN	NaN	NaN	8.81815	NaN	NaN	8.72819	8.64798	8.26139
823	VLTYGYES	8	931.442	1	9.4689	NaN	NaN	10.3735	12.0142	NaN	NaN	11.8986	10.6708	13.3686	13.0326	12.605	NaN	NaN	NaN	12.0396	11.6711	NaN	NaN	NaN	NaN	NaN	11.5653	11.2894
824	LAQSVTLNS	9	466.758	2	13.1585	NaN	12.2154	NaN	NaN	11.3616	7.55963	11.1091	NaN	12.1325	10.867	9.61198	12.9556	NaN	NaN	10.3886	10.8767	NaN	10.4109	13.2643	10.6481	NaN	10.037	11.2442
825	LATSQSTVK	9	467.765	2	NaN	NaN	NaN	NaN	NaN	NaN	NaN	NaN	NaN	NaN	NaN	NaN	NaN	NaN	NaN	NaN	NaN	NaN	NaN	NaN	NaN	9.68242	11.5938	11.9705
826	GNNLYLLK	8	467.772	2	9.38899	NaN	NaN	NaN	10.5252	10.3797	NaN	10.4958	NaN	NaN	NaN	NaN	9.87014	NaN	NaN	8.98138	NaN	NaN	NaN	NaN	NaN	NaN	10.1399	10.4333
827	NAACSCGASGV	11	470.188	2	NaN	10.0715	10.2294	NaN	NaN	10.8054	NaN	9.84	NaN	9.96202	NaN	10.5639	NaN	10.7825	NaN	NaN	10.5383	11.0171	NaN	NaN	NaN	NaN	10.7315	10.3563
828	VLPVLNLDG	9	939.55	1	13.9216	14.1637	13.4331	12.5326	13.1132	12.1812	7.95583	12.5704	11.7153	14.225	14.226	14.4896	13.1171	10.8666	10.7438	13.2678	12.7773	12.7991	14.1361	13.8264	13.4242	12.5813	12.4933	12.1687
829	LTEDYGQD	8	940.392	1	NaN	10.9083	9.97065	10.8425	NaN	9.82109	NaN	NaN	9.89118	9.2614	10.5038	9.83578	8.89866	NaN	NaN	9.52927	NaN	NaN	11.3722	11.1362	10.9777	NaN	7.36833	8.56215
830	LACCCSLDL	9	470.708	2	NaN	NaN	9.08854	10.9308	11.4708	NaN	NaN	11.0589	11.2314	12.6782	NaN	NaN	NaN	10.2905	NaN	NaN	NaN	NaN	NaN	NaN	NaN	NaN	11.1348	NaN
831	GDLFVHPR	8	470.754	2	13.4855	13.9287	13.2295	14.568	14.6452	14.5773	NaN	14.3251	14.0141	14.4496	14.1161	NaN	13.903	12.5662	13.4957	NaN	13.8909	14.3949	14.5835	14.3513	13.9485	14.6565	14.5338	14.3697
832	ALPSVELSK	9	472.278	2	NaN	NaN	NaN	NaN	NaN	NaN	NaN	NaN	NaN	NaN	NaN	NaN	NaN	NaN	NaN	NaN	NaN	NaN	NaN	NaN	NaN	NaN	10.2547	10.2495
833	AAGTGTCCSSS	11	472.678	2	NaN	NaN	NaN	NaN	NaN	NaN	NaN	NaN	NaN	NaN	NaN	NaN	9.55702	NaN	NaN	NaN	NaN	NaN	NaN	NaN	NaN	9.40463	7.83847	NaN
834	AAGTGSSMCGS	11	472.678	2	11.452	10.5944	NaN	NaN	8.52992	NaN	NaN	NaN	9.54665	7.51248	NaN	9.44215	9.55702	11.4894	NaN	8.15301	8.56942	NaN	NaN	11.4857	10.734	NaN	7.83847	NaN
835	MESTLNHP	8	472.713	2	NaN	NaN	NaN	10.2031	NaN	9.61584	NaN	9.56505	NaN	NaN	NaN	NaN	NaN	NaN	NaN	NaN	NaN	8.82983	8.92168	NaN	NaN	NaN	9.33133	9.41986
836	NGQYAVHGV	9	472.735	2	NaN	9.47196	NaN	NaN	10.1065	11.0141	NaN	10.6168	NaN	NaN	NaN	NaN	NaN	NaN	NaN	NaN	NaN	NaN	NaN	NaN	NaN	NaN	9.34521	NaN
837	SFVDNHDN	8	474.199	2	NaN	9.59355	9.24107	NaN	NaN	NaN	NaN	NaN	10.0671	NaN	NaN	9.87893	NaN	NaN	NaN	NaN	NaN	NaN	10.1538	NaN	NaN	10.7166	10.1385	9.97173
838	SGNENEFR	8	476.711	2	15.0024	14.2485	13.539	17.2613	17.3796	17.3135	11.9947	17.4012	9.57141	16.4278	9.12837	9.45893	17.6279	9.24627	12.9448	15.795	15.0494	16.1252	7.99663	10.9917	8.66039	11.0716	17.3217	17.2619
839	LSLTFGEDA	9	952.478	1	NaN	NaN	11.5746	16.6383	16.5052	15.7753	NaN	17.3141	16.3928	NaN	NaN	16.0152	NaN	NaN	NaN	15.6763	NaN	NaN	14.6953	NaN	NaN	NaN	16.8574	NaN
840	VFKNPNFS	8	476.749	2	12.5688	13.498	12.1168	13.965	14.0933	14.458	8.72871	14.3911	13.4423	14.2209	13.6521	13.1443	14.35	11.8459	13.1502	13.697	13.823	13.7342	14.3028	NaN	13.5967	14.3887	13.7131	14.0527
841	GYESHMTE	8	477.188	2	12.9514	12.9889	11.9587	13.1917	12.9989	13.0351	8.20594	12.7576	12.9788	13.3142	13.1411	13.2002	14.1195	12.6076	NaN	NaN	11.9741	13.3386	13.756	13.9017	10.7711	12.6889	12.7663	12.6623
842	FLSLHSYS	8	477.24	2	NaN	NaN	NaN	NaN	11.4884	12.4433	NaN	13.1604	NaN	11.3455	NaN	NaN	NaN	NaN	NaN	10.983	11.3389	12.0869	NaN	NaN	NaN	NaN	11.2951	12.1039
843	LWLNTGLH	8	477.756	2	10.9887	11.6779	10.894	11.3536	11.8639	11.4087	NaN	NaN	NaN	12.547	12.9366	13.2647	9.57524	10.8489	NaN	NaN	11.8896	12.4951	12.9141	NaN	11.9228	12.4455	11.8519	11.4926
844	KVYVSSDGT	9	478.242	2	NaN	NaN	NaN	NaN	NaN	NaN	NaN	NaN	NaN	NaN	10.034	9.65856	NaN	NaN	NaN	8.14539	NaN	NaN	NaN	NaN	NaN	9.82964	8.80549	8.79301
845	FQYGSLLK	8	478.267	2	NaN	NaN	NaN	NaN	10.7868	11.1226	NaN	10.0227	NaN	9.84993	NaN	NaN	NaN	NaN	NaN	NaN	11.4003	11.4321	NaN	NaN	NaN	NaN	10.7148	10.9873
846	LAVLTQTPL	9	478.296	2	8.46848	8.35698	7.85674	8.68369	NaN	7.88969	NaN	NaN	NaN	NaN	8.45358	8.32571	8.4724	NaN	7.78682	7.47375	NaN	NaN	9.05344	NaN	NaN	NaN	7.638	NaN
847	FVHEKWN	7	480.242	2	8.80603	10.0943	NaN	10.6351	11.3863	NaN	NaN	10.8565	9.84223	11.9992	11.447	NaN	NaN	NaN	NaN	NaN	11.3681	11.9896	11.4153	9.43829	NaN	10.6301	10.586	NaN
848	SLGAGAATEAL	11	480.755	2	NaN	NaN	NaN	NaN	NaN	NaN	NaN	NaN	11.7909	NaN	NaN	NaN	NaN	NaN	NaN	11.3596	NaN	NaN	NaN	NaN	NaN	NaN	11.7359	12.0312
849	LDALYLPR	8	480.781	2	NaN	NaN	NaN	10.7927	10.3583	10.1052	NaN	10.0549	9.05341	10.0495	NaN	9.46318	9.64355	8.80252	10.0691	9.56606	9.30003	9.66145	9.57297	9.13944	NaN	9.77225	10.0347	9.9118
850	TFVDNHDN	8	481.205	2	8.76017	8.70613	NaN	9.60943	NaN	NaN	NaN	NaN	NaN	NaN	NaN	NaN	NaN	NaN	NaN	NaN	NaN	NaN	9.86571	NaN	9.25351	NaN	9.76027	NaN
851	VGKPGNPKPA	10	482.784	2	NaN	NaN	13.6463	13.0409	13.2407	12.9282	NaN	12.0501	NaN	13.2653	13.7648	13.4964	NaN	NaN	12.5919	NaN	13.8947	13.9852	NaN	NaN	13.5989	NaN	12.4892	12.3766
852	GSSYEGRPL	9	483.239	2	NaN	NaN	NaN	NaN	NaN	12.3627	NaN	11.422	NaN	NaN	10.7808	NaN	NaN	NaN	NaN	12.2298	NaN	NaN	NaN	NaN	NaN	NaN	12.1939	12.1763
853	TDVHLRPK	8	483.281	2	NaN	9.10373	NaN	NaN	9.77759	NaN	NaN	9.06712	9.06974	NaN	9.71147	NaN	NaN	8.05237	NaN	9.16059	NaN	NaN	9.82081	9.39145	8.96757	9.81901	9.4046	9.23455
854	ASYRELEV	8	483.749	2	NaN	NaN	NaN	NaN	NaN	NaN	NaN	NaN	NaN	NaN	NaN	NaN	NaN	NaN	NaN	NaN	NaN	NaN	NaN	NaN	NaN	NaN	10.6504	11.1256
855	LQLLYPYG	8	483.769	2	NaN	NaN	NaN	NaN	NaN	11.1856	NaN	11.3751	11.9052	12.4119	NaN	NaN	NaN	NaN	10.2936	13.4381	NaN	NaN	NaN	NaN	NaN	NaN	11.5905	NaN
856	MLANYLNK	8	484.25	2	11.1186	10.8984	10.1917	13.2758	NaN	14.5608	8.86955	15.4155	NaN	13.973	NaN	NaN	11.6006	NaN	NaN	NaN	12.7858	NaN	NaN	NaN	NaN	9.33997	14.9449	14.7669
857	SGNENEYR	8	484.709	2	NaN	NaN	NaN	10.3626	10.6745	10.4902	NaN	10.6303	NaN	NaN	NaN	NaN	10.5786	NaN	NaN	9.05525	NaN	NaN	NaN	NaN	NaN	NaN	10.5176	10.5569
858	GYESHMTE	8	485.186	2	9.5836	8.46001	NaN	9.08524	10.9738	10.7388	NaN	10.1951	10.2054	10.2622	10.1872	10.0968	10.4878	9.75064	11.1426	10.0521	NaN	10.4561	10.7272	11.0904	10.0484	10.8182	10.397	10.6656
859	YLSGDTWK	8	485.239	2	NaN	NaN	12.9496	14.13	11.2773	14.2156	8.97133	14.0346	11.079	11.7695	NaN	11.195	14.4157	NaN	13.4652	14.6651	14.0416	14.702	10.9978	13.0797	NaN	12.2803	14.1275	14.0076
860	NAGNLFVHP	9	485.244	2	11.9319	NaN	11.7997	NaN	10.9622	11.2855	NaN	NaN	14.0412	NaN	16.3529	NaN	NaN	11.5447	NaN	11.6271	NaN	11.6326	NaN	13.2038	NaN	NaN	10.622	NaN
861	NAGDLFVHP	9	485.244	2	11.9319	12.415	11.7997	11.412	10.9622	NaN	NaN	10.5298	14.0412	12.6233	16.3529	15.7176	9.424	11.5447	11.5011	11.6271	11.3899	11.6326	15.6941	13.2038	13.0956	14.2869	10.622	10.3265
862	LFVNNHDN	8	487.224	2	NaN	10.6862	NaN	NaN	10.8576	10.877	NaN	NaN	9.97042	NaN	10.2312	NaN	NaN	NaN	NaN	NaN	NaN	NaN	NaN	NaN	NaN	NaN	10.7518	10.399
863	LFVDNHDN	8	487.224	2	NaN	NaN	10.2421	10.5671	NaN	9.64822	NaN	NaN	NaN	9.75068	NaN	NaN	NaN	NaN	NaN	9.59679	10.0797	10.445	10.8134	NaN	NaN	11.3879	9.9516	NaN
864	DSLFVHEK	8	487.752	2	12.0977	12.0123	11.4284	12.4249	11.9548	11.5821	6.88712	11.7132	11.8645	13.4407	13.0715	13.6493	12.5406	10.7382	12.8827	12.8832	11.6458	12.5124	12.6905	11.9582	12.8176	12.3103	11.8533	11.3877
865	EANVTQASGV	10	488.742	2	NaN	NaN	NaN	NaN	NaN	12.4795	NaN	NaN	NaN	NaN	14.331	14.4014	NaN	NaN	NaN	NaN	13.1679	NaN	NaN	13.1715	NaN	NaN	12.4473	NaN
866	MEHTLNHP	8	489.728	2	13.2531	13.7504	12.5546	15.1043	15.2202	14.7836	9.94621	14.9201	14.8706	15.5123	15.2312	15.7404	14.1173	13.3713	14.033	14.4945	13.892	14.4653	15.5947	14.671	14.9349	14.8415	14.5923	14.1422
867	EGDWGSTVK	9	489.739	2	NaN	NaN	11.0032	14.0134	13.9325	NaN	NaN	NaN	NaN	11.3828	NaN	NaN	NaN	12.6877	13.9245	NaN	12.8237	NaN	NaN	11.6105	10.6914	NaN	12.9769	NaN
868	VVGGENAVPH	10	489.755	2	17.4845	17.5096	17.2203	14.6418	NaN	NaN	10.1645	NaN	15.2632	15.8141	16.3086	16.5148	NaN	17.2997	16.2996	15.8774	16.9495	16.1438	17.3515	17.4916	16.8596	15.4933	13.9402	13.7122
869	TPEAELHQG	9	491.237	2	NaN	9.33936	NaN	10.2791	10.3204	10.115	NaN	9.92181	9.81693	9.27729	NaN	NaN	10.2231	NaN	10.1128	8.9648	NaN	NaN	10.1977	10.1374	10.666	NaN	9.69594	9.33396
870	LLWTNGPLA	9	492.78	2	NaN	NaN	NaN	8.17882	7.92746	7.96471	NaN	NaN	NaN	NaN	NaN	NaN	NaN	NaN	NaN	NaN	NaN	NaN	NaN	NaN	NaN	NaN	7.58036	NaN
871	DPVSENPDL	9	493.229	2	NaN	NaN	9.96328	10.6119	NaN	9.80084	NaN	NaN	10.1032	NaN	10.5166	10.5802	9.7329	9.95778	NaN	9.65044	NaN	NaN	11.5857	10.9647	NaN	9.50268	8.52881	8.85439
872	APYNKEHK	8	493.758	2	8.55645	9.14601	NaN	9.9759	10.9822	10.6075	NaN	10.3518	NaN	9.04204	NaN	NaN	NaN	NaN	NaN	9.18546	8.93466	9.74389	NaN	NaN	NaN	8.71769	10.5517	10.4863
873	FYLNTGDAS	9	494.226	2	10.448	10.7517	NaN	11.7924	12.2126	11.6556	7.05528	12.5499	11.0143	12.7731	12.4293	12.2823	11.1284	NaN	10.7131	11.8148	11.3286	11.37	12.0904	NaN	10.659	11.6367	11.8396	12.0262
874	LNVLYLRP	8	494.796	2	NaN	NaN	NaN	NaN	NaN	NaN	NaN	NaN	NaN	NaN	NaN	NaN	NaN	NaN	NaN	NaN	NaN	7.20977	6.67924	NaN	NaN	8.35285	8.45112	NaN
875	VVGGENALPH	10	496.763	2	16.5195	16.5821	16.3181	12.6177	13.1164	12.8071	8.06959	11.9794	13.092	14.5212	14.8655	15.065	14.4634	16.0855	14.989	14.6182	15.9635	14.9219	16.0256	16.3312	15.5414	13.2149	11.8932	11.7355
876	MEHTLNHP	8	497.725	2	NaN	NaN	NaN	13.0086	10.9517	12.306	NaN	12.3454	12.2554	12.4936	12.4651	12.524	10.8213	10.4119	11.5628	NaN	10.3747	11.2792	12.8276	11.7735	11.6242	12.4381	11.8195	11.754
877	ELATLYGTK	9	498.276	2	10.3333	NaN	NaN	9.75793	11.8355	NaN	NaN	NaN	NaN	NaN	NaN	NaN	9.7895	NaN	NaN	NaN	9.69808	NaN	NaN	NaN	11.543	NaN	12.2713	NaN
878	LLMGFPTYG	9	499.755	2	8.79156	9.87722	8.0806	10.5087	10.7103	10.3224	NaN	9.98171	NaN	11.8087	11.4422	10.4924	10.7348	NaN	8.04973	10.9123	10.3497	10.3835	10.226	8.20537	9.20701	9.01283	8.84147	8.90084
879	LGVNGLLNAK	10	500.296	2	NaN	NaN	NaN	NaN	NaN	NaN	NaN	NaN	NaN	NaN	NaN	NaN	NaN	NaN	NaN	NaN	NaN	NaN	NaN	NaN	NaN	NaN	12.2208	12.018
880	QVTSENPDL	9	1002.48	1	NaN	NaN	13.0303	13.654	NaN	13.2933	NaN	13.6001	NaN	14.3047	NaN	NaN	NaN	NaN	NaN	NaN	14.1061	NaN	NaN	NaN	14.4693	NaN	13.2569	13.2199
881	YTNGPLPDK	9	502.758	2	10.8087	NaN	10.8539	NaN	12.2703	12.3672	7.48691	10.5645	11.3698	10.6606	11.1934	NaN	9.67167	NaN	10.5237	11.7965	12.0613	12.4784	11.8237	11.2832	11.0167	NaN	11.9452	NaN
882	NDDWQLSK	8	503.235	2	NaN	NaN	NaN	11.8706	12.2507	11.8492	NaN	10.8245	NaN	NaN	NaN	NaN	11.3059	NaN	NaN	NaN	NaN	NaN	NaN	NaN	NaN	NaN	11.6396	11.5332
883	EGDWGSTVR	9	503.742	2	NaN	NaN	NaN	NaN	13.9412	NaN	NaN	15.0008	NaN	NaN	NaN	NaN	15.9071	NaN	NaN	NaN	NaN	NaN	NaN	NaN	NaN	NaN	13.8463	14.7579
884	AGNLFVHPR	9	506.274	2	12.4655	12.86	12.1837	NaN	NaN	NaN	8.33668	13.2538	NaN	13.4194	13.0791	13.3955	12.8893	NaN	NaN	13.1318	12.904	NaN	13.5616	13.3239	12.9656	13.614	13.4934	13.3069
885	NFDAFLER	8	506.74	2	NaN	NaN	NaN	NaN	NaN	NaN	NaN	NaN	NaN	NaN	NaN	NaN	NaN	NaN	NaN	NaN	NaN	NaN	NaN	NaN	NaN	9.80977	9.73581	NaN
886	DFNAFLER	8	506.74	2	NaN	NaN	NaN	NaN	NaN	NaN	NaN	NaN	NaN	NaN	NaN	NaN	NaN	NaN	NaN	NaN	NaN	NaN	NaN	NaN	NaN	NaN	9.73581	9.06451
887	HCVLDLGGEA	10	507.245	2	NaN	8.83782	NaN	NaN	NaN	9.2275	NaN	NaN	NaN	8.58124	NaN	NaN	NaN	NaN	NaN	NaN	NaN	NaN	NaN	NaN	NaN	NaN	7.59891	8.25577
888	VVGGEDARPN	10	507.256	2	NaN	NaN	12.5212	NaN	11.2204	NaN	6.41164	NaN	NaN	11.4957	NaN	NaN	11.8309	12.9029	NaN	12.0476	13.6231	12.7095	13.3647	NaN	12.6185	NaN	10.6494	10.6796
889	SSYWGSTVK	9	507.75	2	11.8509	11.9055	11.6963	14.1508	15.3837	15.438	9.62866	15.0217	NaN	13.9514	NaN	NaN	13.2863	NaN	NaN	14.8646	14.2849	15.3728	NaN	NaN	NaN	NaN	15.5173	15.3466
890	HGKFNPSEV	9	507.756	2	14.1174	14.1747	14.017	14.2583	14.3038	14.0515	NaN	NaN	14.6112	13.3698	15.0489	14.9978	13.6535	NaN	NaN	13.4325	13.9621	13.8746	14.9497	15.0641	NaN	14.9789	13.8305	NaN
891	ALLDNLDLK	9	507.795	2	NaN	10.0615	NaN	11.6692	11.8902	11.4994	NaN	11.1681	11.3628	11.5909	11.2583	11.6715	10.047	9.25844	10.0578	10.615	9.96379	10.8027	12.0892	11.7937	11.5566	11.816	11.6636	11.376
892	ALLNNLDLK	9	507.795	2	NaN	10.0615	NaN	11.6692	NaN	11.4994	NaN	NaN	NaN	11.5909	NaN	NaN	NaN	NaN	NaN	10.615	9.96379	10.8027	NaN	NaN	NaN	NaN	11.6636	11.376
893	SLLGNLGLTK	10	508.311	2	NaN	NaN	8.41011	10.0773	10.3554	NaN	NaN	11.1514	NaN	NaN	NaN	NaN	9.91699	NaN	NaN	9.48564	10.2878	10.5959	NaN	NaN	NaN	NaN	10.8714	11.1235
894	SSQYFGQAQ	9	508.728	2	NaN	NaN	NaN	NaN	NaN	NaN	NaN	NaN	NaN	NaN	NaN	NaN	NaN	NaN	NaN	NaN	NaN	11.5006	NaN	NaN	NaN	NaN	12.6686	13.0636
895	VDFVNDHGN	9	508.727	2	NaN	NaN	NaN	11.1416	11.0121	10.537	NaN	11.1385	13.0351	11.116	14.7047	14.1234	NaN	NaN	9.93214	10.8239	9.31304	NaN	13.4695	11.2533	11.0316	12.7649	10.8169	10.6997
896	LLYPYGYK	8	508.777	2	10.4466	10.9799	9.67367	12.252	14.5092	14.6432	NaN	14.4526	NaN	13.9138	NaN	NaN	12.9753	NaN	NaN	14.3263	13.775	15.1852	NaN	NaN	NaN	NaN	14.7235	15.059
897	NSNDLTLLK	9	509.283	2	NaN	NaN	NaN	12.6728	NaN	12.8003	6.56854	12.5864	NaN	NaN	NaN	NaN	12.4199	NaN	9.60432	NaN	NaN	NaN	NaN	NaN	NaN	NaN	12.0816	12.4467
898	FSTGGNNRAP	10	510.748	2	16.7103	17.1102	16.581	17.5759	17.7609	17.5335	12.7412	16.8824	17.2863	17.4957	17.7241	17.7609	15.9508	16.4811	16.418	17.3699	17.3755	17.7513	18.2281	17.8107	17.4603	17.6403	17.2922	17.0789
899	FSTGGNNRPA	10	510.748	2	NaN	17.1102	16.581	NaN	NaN	NaN	NaN	NaN	NaN	NaN	NaN	17.7609	NaN	NaN	NaN	17.3699	NaN	NaN	18.2281	NaN	NaN	17.6403	17.2922	17.0789
900	FSTGGDNRAP	10	511.24	2	11.4191	NaN	11.2783	12.6462	12.5337	11.9758	7.81403	11.516	12.6739	12.231	13.4484	13.3958	10.913	NaN	NaN	12.5427	11.9181	12.3468	13.6919	12.8384	12.7215	13.2538	11.9869	11.6751
901	FTALLDNLN	9	511.265	2	9.32059	9.19516	NaN	NaN	NaN	NaN	NaN	NaN	10.7931	NaN	NaN	NaN	NaN	NaN	NaN	11.1793	10.1124	11.0121	NaN	NaN	NaN	NaN	11.0711	NaN
902	FTALLDNLD	9	1021.52	1	NaN	NaN	8.36105	NaN	11.7607	10.5243	NaN	10.2781	NaN	12.9643	12.887	13.076	NaN	8.77145	NaN	NaN	NaN	NaN	11.9504	11.2132	10.3589	11.8127	10.8477	10.8052
903	YHDAGFGGAGA	11	511.721	2	NaN	13.2901	13.1531	NaN	NaN	14.2248	9.94546	NaN	NaN	NaN	NaN	NaN	NaN	NaN	13.3578	NaN	14.5119	14.3659	14.0531	NaN	14.6666	13.7464	13.7632	13.3313
904	NWNAGFGGAGA	11	511.721	2	NaN	13.2901	NaN	13.739	13.8234	NaN	NaN	NaN	NaN	NaN	13.2518	NaN	NaN	NaN	NaN	NaN	NaN	14.3659	14.0531	NaN	NaN	NaN	13.7632	NaN
905	LVFGGNDDW	9	511.733	2	NaN	10.5596	9.68454	10.5974	9.98364	9.65551	NaN	NaN	11.3704	NaN	NaN	10.4855	NaN	11.6847	NaN	8.79711	NaN	NaN	11.4545	NaN	11.3315	NaN	9.37005	8.66935
906	STLANYLNK	9	512.77	2	NaN	NaN	NaN	11.2068	11.6414	11.7472	NaN	12.1007	NaN	10.3732	NaN	NaN	NaN	NaN	NaN	9.65956	NaN	10.0412	NaN	NaN	NaN	NaN	11.6639	11.6284
907	VYVSSDGTAQ	10	513.743	2	NaN	NaN	NaN	NaN	9.9561	11.3119	NaN	10.9735	NaN	NaN	NaN	NaN	13.9233	NaN	NaN	NaN	NaN	NaN	NaN	NaN	NaN	NaN	9.65327	NaN
908	KVYVSSDGTA	10	513.76	2	NaN	NaN	NaN	10.3242	10.3694	9.982	NaN	10.2837	9.51262	9.70249	NaN	NaN	10.3855	NaN	NaN	NaN	NaN	NaN	NaN	NaN	NaN	10.4117	10.2374	10.1868
909	TGNPALDLKP	10	513.778	2	NaN	NaN	NaN	NaN	NaN	NaN	NaN	NaN	NaN	NaN	NaN	NaN	NaN	NaN	NaN	NaN	NaN	NaN	NaN	NaN	NaN	10.0623	9.55428	NaN
910	HSLSTNEPGS	10	514.737	2	13.8858	14.4483	NaN	NaN	NaN	NaN	NaN	NaN	14.3582	15.7649	16.1154	NaN	13.5556	NaN	14.0966	14.8904	NaN	14.9622	15.5032	NaN	14.6007	11.9732	14.5202	NaN
911	EGAVLDLGGEA	11	515.757	2	NaN	NaN	NaN	13.2938	13.6135	13.2035	NaN	NaN	NaN	13.1552	NaN	NaN	NaN	NaN	NaN	NaN	NaN	NaN	13.3397	NaN	NaN	NaN	13.2324	NaN
912	HMSMPGDLK	9	516.236	2	NaN	NaN	NaN	NaN	NaN	14.0358	NaN	13.8888	NaN	NaN	NaN	NaN	NaN	NaN	NaN	NaN	NaN	NaN	NaN	NaN	NaN	14.301	14.043	13.8033
913	VLQELVPPH	9	516.299	2	NaN	NaN	NaN	NaN	NaN	NaN	NaN	NaN	NaN	NaN	NaN	NaN	NaN	NaN	NaN	NaN	NaN	NaN	NaN	NaN	NaN	12.4809	11.2283	10.4891
914	SGGLESYNDP	10	519.724	2	NaN	NaN	NaN	11.6601	12.2563	NaN	NaN	NaN	11.415	NaN	11.0957	NaN	NaN	NaN	NaN	NaN	NaN	NaN	NaN	11.2531	NaN	NaN	12.6671	NaN
915	SAWNFNDGK	9	520.229	2	NaN	15.6375	14.983	NaN	NaN	16.4761	11.4431	15.1524	15.902	NaN	NaN	15.2071	NaN	NaN	16.8129	15.1549	NaN	15.2069	NaN	16.5664	16.7948	NaN	16.3514	NaN
916	ALLDNLDLR	9	521.799	2	NaN	NaN	NaN	9.46222	NaN	NaN	NaN	8.78011	NaN	8.50285	NaN	NaN	NaN	NaN	NaN	NaN	7.66058	NaN	NaN	NaN	NaN	8.04272	9.24973	9.08438
917	ALLNNLDLR	9	521.799	2	NaN	NaN	NaN	NaN	9.66547	9.05031	NaN	NaN	7.4176	NaN	NaN	NaN	NaN	NaN	NaN	NaN	NaN	NaN	NaN	NaN	NaN	NaN	9.24973	NaN
918	YVQLGVLPR	9	522.815	2	NaN	NaN	9.60715	11.7261	11.2983	NaN	NaN	10.9029	NaN	NaN	NaN	NaN	NaN	NaN	NaN	11.6963	NaN	NaN	NaN	NaN	NaN	11.507	11.3248	NaN
919	FVHEKWNS	8	523.757	2	NaN	12.1644	10.6529	13.3203	13.4903	13.0181	NaN	13.5129	11.6924	13.5175	12.7851	12.5773	12.1141	NaN	NaN	13.0455	12.5431	13.0859	13.1732	10.9338	NaN	12.4637	12.7092	12.942
920	LGNNLYLLK	9	524.314	2	10.9308	10.965	10.2198	9.00323	9.12697	8.43472	NaN	8.67426	NaN	9.51692	NaN	NaN	9.85314	NaN	NaN	NaN	NaN	8.58502	NaN	8.72091	NaN	NaN	8.48439	NaN
921	YSFSFELR	8	524.759	2	NaN	NaN	NaN	NaN	10.2155	9.36616	NaN	11.8366	NaN	NaN	NaN	NaN	NaN	NaN	NaN	9.88634	9.64922	11.5471	NaN	NaN	NaN	NaN	10.604	12.3344
922	FPNSEVEVK	9	524.771	2	14.8357	14.9532	14.4678	15.304	15.2011	15.4372	10.4674	14.2888	13.5139	14.3312	NaN	11.1623	16.1073	16.9511	17.7902	15.1707	14.7865	15.002	12.7709	15.8892	16.1807	14.3802	15.0017	14.6181
923	NTLLLYPYG	9	527.284	2	14.2812	NaN	NaN	15.8146	15.2112	NaN	10.7556	NaN	15.2676	NaN	15.4246	15.5738	NaN	NaN	14.7147	NaN	NaN	NaN	7.72264	NaN	14.9198	NaN	14.5995	NaN
924	SQLLLYPYG	9	527.284	2	NaN	NaN	NaN	16.3778	15.2112	NaN	NaN	NaN	8.39058	NaN	15.4246	NaN	14.9333	NaN	NaN	NaN	NaN	NaN	NaN	NaN	NaN	NaN	14.5995	NaN
925	YNNPYQVR	8	527.753	2	NaN	NaN	NaN	NaN	10.4385	10.4737	NaN	NaN	NaN	NaN	NaN	NaN	NaN	NaN	NaN	NaN	NaN	10.4324	NaN	NaN	NaN	NaN	10.9618	10.6923
926	SMLANYLNK	9	527.766	2	14.8598	14.7697	14.1803	15.662	16.7213	16.7321	10.709	17.0618	NaN	15.8666	NaN	NaN	16.5367	NaN	11.9105	15.038	14.7304	15.4096	NaN	12.0908	11.289	12.0442	16.763	16.6952
927	DMSPLRPQN	9	529.26	2	11.3665	NaN	10.895	NaN	NaN	NaN	NaN	NaN	NaN	10.043	NaN	NaN	NaN	NaN	NaN	NaN	NaN	NaN	11.3359	12.0011	11.4777	NaN	9.89211	NaN
928	DGVWTLVGLV	10	529.799	2	8.60358	NaN	NaN	9.32309	NaN	9.60931	NaN	NaN	8.82256	NaN	NaN	NaN	NaN	5.40423	10.5014	NaN	NaN	9.38641	NaN	NaN	NaN	NaN	9.38317	NaN
929	SMLADYLNK	9	535.764	2	10.0119	9.59876	NaN	10.8278	15.0291	15.5942	9.51781	15.632	NaN	13.9836	NaN	NaN	14.0311	NaN	NaN	10.2561	NaN	14.4804	NaN	NaN	NaN	NaN	15.1962	15.3847
930	SAMSDFNDGK	10	536.225	2	NaN	NaN	NaN	NaN	NaN	NaN	NaN	NaN	NaN	NaN	NaN	NaN	9.02628	NaN	NaN	NaN	NaN	9.25066	NaN	NaN	9.93388	10.7704	10.1801	NaN
931	LAEPVELSDT	10	537.273	2	9.71033	8.68703	NaN	10.1662	NaN	9.35803	NaN	10.7265	NaN	NaN	10.2509	9.87964	11.1866	NaN	10.8864	10.6674	NaN	9.85003	NaN	NaN	NaN	NaN	10.0597	10.1462
932	EGELHFDVE	9	537.742	2	NaN	NaN	NaN	11.0655	10.5083	NaN	NaN	NaN	NaN	NaN	NaN	NaN	NaN	NaN	NaN	NaN	NaN	NaN	NaN	NaN	NaN	10.6113	11.0112	10.9309
933	EELYDFMK	8	537.745	2	NaN	NaN	NaN	9.27939	NaN	NaN	NaN	NaN	NaN	NaN	NaN	NaN	NaN	NaN	NaN	7.8362	7.95718	NaN	NaN	NaN	NaN	NaN	9.05445	9.0849
934	EGRPLYVLK	9	358.882	3	12.2395	11.6014	11.3334	11.8243	11.3897	NaN	6.48371	10.8158	NaN	NaN	NaN	NaN	12.3734	NaN	NaN	10.0878	NaN	NaN	NaN	NaN	NaN	NaN	11.1311	NaN
935	GFGVQGLLTGK	11	538.809	2	NaN	NaN	NaN	NaN	NaN	NaN	NaN	NaN	NaN	NaN	NaN	NaN	NaN	NaN	NaN	NaN	NaN	NaN	NaN	NaN	NaN	10.2792	10.6876	NaN
936	GLLFTDLLGK	10	538.821	2	NaN	NaN	NaN	NaN	NaN	NaN	NaN	NaN	NaN	NaN	NaN	NaN	NaN	NaN	NaN	NaN	NaN	NaN	NaN	NaN	NaN	NaN	8.1316	7.86338
937	QVVLGEYDR	9	539.781	2	11.5775	NaN	10.5721	11.7602	NaN	NaN	NaN	NaN	11.4498	10.5667	NaN	12.0133	NaN	14.7757	15.4643	11.5296	NaN	NaN	NaN	12.0184	13.6964	11.9029	10.5486	NaN
938	YLDDALNQK	9	540.773	2	NaN	12.3397	11.2882	NaN	NaN	13.0225	NaN	NaN	12.1713	NaN	11.8512	NaN	NaN	NaN	NaN	NaN	NaN	NaN	12.8952	12.6881	NaN	NaN	12.7565	NaN
939	LLPWDPKDV	9	541.799	2	13.9718	14.4104	12.7112	12.7055	13.3322	12.9165	NaN	12.8409	11.7139	14.7993	14.8608	14.8241	NaN	NaN	NaN	15.1434	14.4707	15.0179	15.0606	14.1191	NaN	14.053	13.7878	14.0999
940	GLLNLALEKD	10	543.806	2	NaN	NaN	NaN	13.1708	12.4623	12.1714	NaN	NaN	12.4686	12.1565	11.9951	NaN	11.758	NaN	NaN	10.7606	NaN	NaN	NaN	11.2956	10.9559	13.4383	12.5032	NaN
941	LGLNLALEKD	10	543.806	2	NaN	NaN	10.6233	NaN	12.4623	NaN	NaN	12.8601	NaN	NaN	11.9951	11.9979	11.758	NaN	9.84004	10.7606	NaN	10.375	11.3554	NaN	NaN	NaN	12.5032	11.9944
942	LMEHTLNHP	9	364.516	3	9.56872	9.84443	9.047	11.1956	11.4284	11.0744	NaN	11.2842	10.9656	11.6897	11.076	11.5549	NaN	NaN	9.81329	NaN	NaN	10.8325	10.7548	9.97882	10.2874	10.944	10.9088	10.6055
943	FLLDLNDNK	9	1091.56	1	10.7346	NaN	9.96165	NaN	13.666	NaN	NaN	12.9927	NaN	NaN	12.7475	12.2615	NaN	11.2521	NaN	NaN	NaN	NaN	13.4626	NaN	NaN	NaN	12.5863	13.0453
944	LGVQDLFGSR	10	546.295	2	NaN	NaN	NaN	NaN	NaN	NaN	NaN	NaN	NaN	NaN	NaN	NaN	NaN	NaN	NaN	NaN	NaN	NaN	NaN	NaN	NaN	NaN	8.18103	8.18475
945	DSANNAVVFR	10	546.778	2	NaN	NaN	NaN	NaN	NaN	NaN	NaN	NaN	NaN	NaN	NaN	NaN	NaN	NaN	NaN	NaN	NaN	NaN	NaN	NaN	NaN	NaN	8.48845	7.98239
946	APVLSDSSSMC	11	548.737	2	NaN	NaN	NaN	10.0858	9.97328	10.6436	NaN	NaN	NaN	NaN	NaN	NaN	NaN	13.857	NaN	NaN	11.6282	NaN	NaN	NaN	NaN	NaN	10.3021	10.0164
947	SMLSCCAGASGV	12	551.225	2	NaN	NaN	NaN	11.5708	NaN	NaN	NaN	NaN	NaN	NaN	NaN	NaN	NaN	NaN	10.9903	NaN	NaN	NaN	NaN	NaN	NaN	11.85	10.7929	NaN
948	LTQDYGQDPA	10	554.745	2	16.2948	16.5746	15.9698	NaN	16.5537	16.3696	NaN	NaN	16.1639	NaN	NaN	NaN	15.9356	15.3139	NaN	16.5911	16.5421	16.7818	16.9818	17.0313	16.8226	16.6496	16.2548	16.2337
949	TALGTTFLGNN	11	554.786	2	12.7579	12.6858	12.2539	11.1567	11.3284	NaN	NaN	11.9126	10.4596	13.4749	NaN	NaN	11.9813	NaN	NaN	12.7284	12.132	12.2234	NaN	13.2216	12.7911	11.6997	10.8674	NaN
950	ASGGLESYNDP	11	555.243	2	NaN	NaN	NaN	NaN	12.4797	NaN	7.94235	NaN	NaN	NaN	NaN	NaN	NaN	NaN	NaN	NaN	NaN	NaN	NaN	NaN	NaN	13.1016	12.8864	12.6662
951	TGFLDEGLEE	10	555.26	2	NaN	NaN	NaN	8.50519	9.09923	8.12703	NaN	NaN	NaN	NaN	NaN	NaN	NaN	NaN	NaN	NaN	NaN	NaN	NaN	NaN	7.35512	9.03888	8.09485	NaN
952	MTEFLNKLD	9	555.78	2	10.401	10.6284	9.83456	10.3128	10.9008	9.17647	NaN	10.2342	NaN	12.0502	12.4002	12.4954	9.07981	NaN	NaN	11.7932	12.3145	11.2925	10.85	NaN	8.97812	11.3767	10.1266	9.29533
953	RAKLLNLGVAG	11	556.838	2	NaN	NaN	NaN	NaN	NaN	NaN	NaN	NaN	NaN	NaN	NaN	NaN	NaN	NaN	NaN	NaN	NaN	NaN	NaN	NaN	NaN	15.3818	12.521	NaN
954	YGYESHMTE	9	558.72	2	NaN	NaN	NaN	11.3536	11.3566	11.3023	NaN	11.3887	NaN	10.6829	NaN	NaN	10.6706	NaN	10.3681	NaN	NaN	10.0968	NaN	NaN	NaN	NaN	11.0296	10.7895
955	LSWLNNVLAS	10	558.806	2	13.5228	14.8064	NaN	NaN	14.2824	NaN	7.82852	NaN	11.4284	12.9242	NaN	NaN	NaN	NaN	NaN	NaN	NaN	NaN	13.6085	NaN	NaN	NaN	14.0023	NaN
956	SDAENLQVLK	10	559.291	2	NaN	7.84022	NaN	NaN	NaN	NaN	NaN	10.5392	NaN	NaN	NaN	NaN	11.2722	NaN	11.5911	NaN	NaN	NaN	NaN	NaN	NaN	NaN	9.77051	10.0268
957	LYTNGPLPDK	10	559.299	2	7.00666	11.4443	NaN	16.6736	16.8281	16.6107	11.219	11.8627	7.71178	16.5611	15.9345	16.3171	NaN	NaN	11.504	16.385	6.80909	7.97586	NaN	8.03381	15.4443	8.28468	16.6518	16.5437
958	HNLFENEDT	9	559.745	2	13.3584	13.2756	12.7632	12.9263	12.9656	12.6002	8.25032	12.6279	NaN	13.3625	13.0558	NaN	12.8499	NaN	NaN	13.0041	12.5398	12.8768	13.4633	NaN	NaN	NaN	12.4947	NaN
959	HHAPQTQSGR	10	559.766	2	NaN	NaN	NaN	NaN	NaN	NaN	11.7285	NaN	11.0873	14.5389	NaN	NaN	NaN	11.12	NaN	NaN	NaN	14.7481	NaN	NaN	NaN	NaN	16.8848	NaN
960	LYTNGLPPDK	10	559.791	2	NaN	NaN	13.264	NaN	NaN	14.0183	NaN	NaN	14.3284	NaN	14.4054	NaN	NaN	NaN	NaN	NaN	13.4113	NaN	NaN	14.5801	13.8366	15.2533	14.3853	14.2701
961	LYTNGPLPDK	10	559.791	2	13.5077	NaN	NaN	14.13	13.7106	NaN	9.38396	13.7959	NaN	NaN	NaN	14.7828	NaN	13.8736	14.6602	14.4382	NaN	14.1911	14.2611	14.5801	NaN	15.2533	14.3853	14.2701
962	NNDNWQLSK	9	560.259	2	NaN	NaN	NaN	11.2788	11.6677	11.4102	NaN	10.4898	NaN	NaN	NaN	NaN	10.4937	NaN	NaN	NaN	NaN	NaN	NaN	NaN	NaN	NaN	11.2449	11.0656
963	QDGSVDNGSNQ	11	560.727	2	NaN	12.3397	NaN	13.3139	13.2422	13.7506	NaN	NaN	12.4012	NaN	NaN	NaN	NaN	NaN	NaN	NaN	NaN	10.8572	NaN	NaN	NaN	NaN	12.3632	NaN
964	LGPPNNNGVLK	11	561.819	2	18.5344	18.4015	18.3652	15.1268	14.9405	15.5045	NaN	NaN	NaN	NaN	13.2576	13.566	17.852	18.8922	17.7103	14.5479	16.2691	14.4444	16.0778	18.0502	17.0711	14.7246	13.8301	NaN
965	LGPPNNNVGLK	11	561.819	2	18.5344	18.4015	NaN	15.1268	14.9405	15.5045	10.0596	12.922	14.4999	13.0981	NaN	NaN	NaN	18.8922	NaN	14.5479	16.2691	14.4444	16.0778	NaN	NaN	NaN	13.8301	13.5318
966	EGDTYNQGLK	10	562.773	2	NaN	NaN	NaN	13.056	NaN	12.8272	8.29121	11.8727	12.9692	NaN	NaN	NaN	NaN	NaN	NaN	NaN	NaN	13.5851	NaN	NaN	NaN	NaN	13.0773	NaN
967	NAGDLFVHPR	10	375.866	3	15.4366	15.8116	15.151	16.4794	16.5751	16.5068	11.3957	16.2335	15.9339	16.3915	16.0096	16.3501	15.6446	14.447	15.3577	16.1196	15.798	16.2834	16.4938	16.2881	15.8764	16.5886	16.4323	16.2756
968	SSAWNFNDGK	10	563.745	2	NaN	NaN	NaN	NaN	NaN	NaN	NaN	NaN	NaN	NaN	NaN	NaN	NaN	NaN	NaN	NaN	NaN	NaN	NaN	NaN	NaN	NaN	9.34219	8.96538
969	YNSEGTLDND	10	564.237	2	9.49531	NaN	NaN	NaN	NaN	10.4747	NaN	NaN	NaN	11.6777	10.96	11.312	NaN	NaN	NaN	10.1933	NaN	NaN	NaN	10.8678	NaN	NaN	10.6603	NaN
970	SYDYKLPEN	9	564.765	2	NaN	NaN	NaN	9.84238	10.2109	NaN	NaN	NaN	NaN	10.1604	NaN	11.2569	NaN	NaN	NaN	NaN	10.2228	11.1447	NaN	NaN	NaN	NaN	10.3645	9.63983
971	LLDNLDALLE	10	1128.63	1	NaN	NaN	NaN	NaN	NaN	NaN	NaN	NaN	NaN	NaN	NaN	NaN	NaN	NaN	NaN	NaN	NaN	7.3684	NaN	NaN	NaN	NaN	6.77695	7.51106
972	GLYEYDELK	9	565.275	2	9.56926	9.54448	NaN	11.0987	NaN	NaN	NaN	NaN	NaN	11.1334	NaN	NaN	10.4397	NaN	9.98059	10.5133	NaN	NaN	NaN	9.43527	NaN	NaN	10.711	10.4656
973	VDFGKEPLGAP	11	565.3	2	NaN	NaN	NaN	NaN	10.152	NaN	NaN	NaN	NaN	NaN	9.94448	10.0219	NaN	NaN	NaN	NaN	NaN	NaN	NaN	NaN	NaN	NaN	10.0963	NaN
974	GVNSLFVHEK	10	377.534	3	10.9653	10.5977	10.6799	NaN	10.4672	10.0258	NaN	10.5235	9.55387	11.9336	11.56	11.5893	12.1556	NaN	10.3843	11.2875	10.5154	NaN	NaN	NaN	NaN	10.3767	10.3599	10.1269
975	GVDSLFVHEK	10	377.534	3	11.9388	NaN	NaN	10.5219	NaN	NaN	NaN	10.5235	9.55387	12.8733	11.56	11.5893	12.1556	NaN	NaN	11.2875	NaN	11.0746	11.0967	NaN	NaN	10.3767	10.3599	11.0832
976	LNSNDLTLLK	10	565.826	2	10.1164	9.52083	9.40293	13.7677	13.3695	13.1563	7.65027	12.674	NaN	NaN	NaN	NaN	14.6815	NaN	11.21	10.0044	10.0565	NaN	NaN	NaN	NaN	NaN	11.9144	11.9108
977	SYVQLGVLPR	10	566.331	2	10.4302	NaN	11.0891	11.2603	11.4942	NaN	NaN	11.4186	NaN	11.7987	10.7973	NaN	12.2406	NaN	10.4779	NaN	NaN	11.0887	NaN	11.0579	NaN	NaN	11.3792	11.6286
978	FTALLDNLDL	10	567.806	2	10.3347	11.3322	9.72353	12.8305	12.9915	12.4849	NaN	12.5895	12.0885	13.3355	12.3275	11.7733	NaN	9.81304	11.4214	9.86125	11.1661	12.0364	13.0445	12.4774	12.7246	12.8683	12.4042	10.0355
979	AFLDEGLQEL	10	568.288	2	NaN	10.2849	8.18999	11.2979	NaN	10.8089	NaN	10.9955	9.92783	10.0583	9.97098	NaN	9.44184	NaN	8.63112	10.3829	9.01013	10.6697	10.4736	9.35133	10.5372	NaN	10.1695	10.6016
980	NNVLNPTLPR	10	569.324	2	16.7295	17.0058	16.1232	14.8206	14.9216	14.7654	9.83763	13.7143	14.4267	15.0144	15.7879	NaN	16.419	16.1805	16.4566	15.3764	16.0774	15.5148	17.6233	17.4036	17.1546	15.8067	14.5701	14.3668
981	SFGNSAVWFK	10	572.27722000000006	2	NaN	NaN	NaN	NaN	NaN	NaN	NaN	NaN	NaN	NaN	NaN	NaN	NaN	NaN	NaN	NaN	NaN	NaN	NaN	NaN	NaN	NaN	11.2288	11.6117
982	EVLNLGGEALK	11	572.318	2	12.7677	13.1429	12.2999	11.9937	12.2099	12.0848	NaN	11.1827	10.4429	10.9341	NaN	NaN	NaN	NaN	NaN	11.8852	11.2858	11.3988	11.0707	NaN	12.6301	11.8682	11.5754	11.6351
983	QSSEYFGNGR	10	572.757	2	NaN	NaN	NaN	11.4403	13.0939	12.9676	NaN	13.0498	NaN	NaN	NaN	NaN	NaN	NaN	NaN	NaN	10.2517	11.2029	NaN	NaN	NaN	NaN	12.7845	13.0129
984	QSSEYFGDGR	10	573.248	2	NaN	NaN	NaN	11.0993	11.6668	11.392	NaN	11.6407	NaN	9.45562	NaN	NaN	NaN	NaN	NaN	10.1838	NaN	9.64603	NaN	NaN	NaN	9.91584	11.613	11.5871
985	GHSLGSHAAGEAG	13	575.767	2	11.9647	11.9535	10.4946	10.747	10.7426	10.6322	NaN	9.98842	9.99517	12.358	12.3275	11.9887	12.1471	11.2028	12.8336	12.037	11.28	12.1418	13.0236	12.9273	12.3685	11.4477	11.1132	10.5977
986	AYLNWLDQK	9	576.291	2	12.3193	12.5802	NaN	12.8988	12.7537	12.3523	7.33949	13.0538	11.3533	13.7522	11.9524	12.45	12.4484	10.1389	NaN	13.5529	12.6902	13.3758	11.9654	11.8214	11.7012	12.0219	12.5039	12.5558
987	APVLSDSSCMAG	12	577.249	2	NaN	14.3352	13.9354	NaN	NaN	12.303	NaN	NaN	NaN	12.9776	15.3223	15.1958	11.1041	14.8421	13.7425	13.1155	13.3754	13.5142	15.3893	15.111	14.505	14.8306	11.8937	11.4862
988	SFGQSAVWFK	10	579.284	2	NaN	NaN	NaN	NaN	NaN	NaN	NaN	NaN	NaN	NaN	NaN	NaN	NaN	NaN	NaN	NaN	NaN	NaN	NaN	NaN	NaN	NaN	8.66427	9.16723
989	DFVNDHNGLK	10	579.783	2	NaN	NaN	13.139	13.3651	13.0643	NaN	NaN	11.8772	NaN	NaN	NaN	NaN	11.3251	NaN	NaN	12.1642	NaN	13.4019	11.9466	14.2059	NaN	NaN	12.4842	12.0379
990	TVSLGAGAKDEL	12	580.813	2	NaN	NaN	NaN	12.0313	NaN	12.2013	NaN	11.9756	NaN	11.7509	11.4007	11.5804	NaN	NaN	NaN	NaN	NaN	10.7687	11.9815	10.0075	NaN	11.9388	11.4388	11.7601
991	YSLMNGTLTY	10	581.783	2	NaN	10.5959	NaN	NaN	NaN	NaN	NaN	NaN	NaN	10.064	11.1308	NaN	NaN	NaN	NaN	11.2063	NaN	11.7296	10.8718	NaN	9.90813	NaN	10.7315	NaN
992	EGDWWGSTVK	10	582.777	2	NaN	11.4297	11.1966	12.5883	NaN	13.2683	NaN	13.2324	NaN	12.185	NaN	NaN	13.1679	NaN	10.6548	13.1952	NaN	13.7576	NaN	NaN	10.3112	NaN	13.6096	13.738
993	LFVDNPYTNS	10	585.278	2	NaN	NaN	NaN	NaN	NaN	NaN	NaN	11.9233	11.724	11.0691	10.8663	NaN	9.34204	NaN	NaN	NaN	NaN	NaN	NaN	NaN	9.96511	12.6919	12.5006	NaN
994	EELYDFMDL	9	1174.5	1	8.69525	9.70047	7.79715	10.9519	10.4572	9.84365	NaN	11.4515	10.4824	10.6851	9.69109	9.67436	11.5462	9.48429	11.7971	10.5736	9.61551	10.1425	10.4169	9.00119	10.6906	10.5334	8.53399	10.2196
995	SNSAENPFLAK	11	589.789	2	NaN	NaN	NaN	11.4488	11.9429	11.9729	NaN	10.1216	NaN	NaN	NaN	NaN	NaN	NaN	NaN	NaN	NaN	NaN	NaN	NaN	NaN	NaN	11.2467	11.0323
996	ALGGWNFGTQK	11	589.803	2	NaN	NaN	NaN	NaN	10.2961	10.3827	NaN	10.9013	NaN	10.7094	NaN	NaN	NaN	NaN	NaN	10.3069	NaN	NaN	NaN	NaN	NaN	NaN	10.3883	10.9405
997	FLVDNPYTES	10	592.778	2	NaN	13.2052	12.8023	14.2837	13.8938	14.0278	9.37491	13.6208	NaN	12.7469	NaN	13.3877	12.238	NaN	NaN	12.7154	NaN	12.7458	13.6545	14.3435	14.0975	14.6045	13.898	13.4953
998	LVGGYTCHQAH	11	593.286	2	NaN	NaN	NaN	10.3235	NaN	NaN	NaN	NaN	11.3499	NaN	12.8414	12.5148	NaN	NaN	NaN	NaN	11.9327	12.3934	NaN	11.168	NaN	12.3611	10.7945	NaN
999	GHLDFFPDGGK	11	595.287	2	12.4533	NaN	NaN	NaN	NaN	NaN	NaN	NaN	NaN	NaN	12.7544	12.3421	12.0486	NaN	13.2316	12.8302	NaN	NaN	NaN	NaN	NaN	12.2549	10.9292	10.4863
1000	EELYDFMDL	9	595.75	2	NaN	NaN	NaN	12.2781	11.7643	11.7718	NaN	11.1682	10.6262	10.117	10.0758	9.17077	8.99992	8.56623	7.45054	10.2064	9.50938	10.6731	10.1097	9.63526	9.05184	11.9706	11.3831	11.9007
1001	MMKLPENNAE	10	596.78	2	NaN	NaN	NaN	11.7742	11.9853	11.4116	NaN	NaN	12.0186	NaN	NaN	NaN	NaN	NaN	NaN	NaN	NaN	NaN	NaN	NaN	NaN	NaN	11.2716	10.8634
1002	TLMEHTLNHP	10	596.794	2	13.7418	13.703	12.6792	13.7426	13.9914	13.6033	8.3972	14.0635	13.1323	15.2056	14.1302	14.37	14.9842	13.0421	14.379	14.1255	13.2054	14.0457	13.96	13.8855	13.9006	13.6961	13.6583	13.4081
1003	QELPFQFDLG	10	597.297	2	NaN	NaN	NaN	NaN	NaN	NaN	NaN	NaN	NaN	NaN	NaN	NaN	NaN	NaN	NaN	NaN	NaN	NaN	NaN	NaN	NaN	10.6346	9.07459	8.7877
1004	EAGALFSDSGLQ	12	597.787	2	NaN	NaN	NaN	NaN	NaN	NaN	NaN	NaN	NaN	NaN	NaN	NaN	NaN	NaN	NaN	NaN	NaN	NaN	NaN	NaN	NaN	12.1895	11.1188	11.2527
1005	WSLEEQQMGS	10	598.253	2	NaN	NaN	NaN	NaN	NaN	NaN	NaN	NaN	NaN	11.1191	10.835	NaN	NaN	NaN	NaN	10.7206	NaN	NaN	NaN	NaN	NaN	NaN	10.8137	NaN
1006	VTQLVSWVHQ	10	598.824	2	NaN	NaN	NaN	NaN	9.18925	9.27571	NaN	9.20342	NaN	NaN	NaN	NaN	7.60416	NaN	NaN	NaN	NaN	NaN	NaN	NaN	NaN	NaN	8.48808	NaN
1007	DSSCCNGDSGGPV	13	599.212	2	NaN	NaN	NaN	NaN	NaN	NaN	NaN	NaN	NaN	NaN	NaN	NaN	NaN	NaN	NaN	NaN	NaN	NaN	NaN	NaN	NaN	11.2264	10.303	NaN
1008	SGNENEFRDM	10	599.745	2	12.8881	13.3561	11.7464	13.0761	15.1685	14.4844	7.50788	15.6195	NaN	16.1743	14.8308	14.2203	13.0739	NaN	NaN	15.2746	13.1708	14.2599	11.7011	NaN	NaN	12.0857	11.6235	14.9999
1009	KLAEPVELSDT	11	601.32	2	13.1683	12.0911	11.0867	NaN	NaN	13.3275	NaN	NaN	11.9353	14.4848	NaN	NaN	NaN	NaN	12.9122	14.4409	12.1592	14.5449	NaN	NaN	NaN	13.4222	13.8244	14.2232
1010	DSNVEVGDLQK	11	602.79	2	10.27	NaN	NaN	NaN	10.6357	NaN	NaN	NaN	NaN	9.96914	NaN	NaN	14.2277	NaN	13.2616	NaN	NaN	NaN	NaN	10.4974	9.49367	NaN	10.4993	10.6603
1011	QLGSSYEGRPL	11	603.811	2	13.9802	14.536	13.0008	NaN	16.0689	16.3089	NaN	16.7011	NaN	17.3101	12.5581	10.5232	13.3945	NaN	NaN	16.5724	15.961	17.1783	NaN	NaN	NaN	NaN	15.9033	16.6339
1012	TLMEHTLNHP	10	403.53	3	NaN	NaN	NaN	11.2728	NaN	NaN	NaN	11.1164	NaN	11.9637	9.31067	11.288	NaN	NaN	NaN	NaN	NaN	9.27971	NaN	10.0156	NaN	10.6907	10.4535	NaN
1013	VSAYLDWLDQ	10	605.294	2	NaN	11.3867	9.17241	NaN	8.89059	10.2309	NaN	11.2567	NaN	13.382	11.1436	7.53757	NaN	NaN	NaN	NaN	10.5766	11.6477	NaN	NaN	NaN	NaN	10.0926	NaN
1014	TASGGLESYNDP	12	605.766	2	NaN	NaN	NaN	14.8399	15.2747	15.2505	NaN	NaN	NaN	NaN	NaN	14.4598	NaN	NaN	NaN	NaN	NaN	NaN	13.4309	15.2559	NaN	16.3465	15.8416	15.5228
1015	TAGSGLESYNDP	12	605.766	2	NaN	NaN	NaN	14.8399	15.2747	NaN	NaN	14.4339	NaN	NaN	NaN	NaN	NaN	NaN	12.7312	NaN	NaN	NaN	NaN	NaN	NaN	NaN	15.8416	NaN
1016	TAGGSLESYNDP	12	605.766	2	14.7207	NaN	13.8284	NaN	NaN	NaN	NaN	14.4339	14.8792	14.6999	NaN	12.6316	12.525	12.2322	NaN	14.2107	NaN	NaN	NaN	NaN	NaN	NaN	15.8416	NaN
1017	TSAFLNWLEE	10	605.785	2	NaN	NaN	13.192	NaN	NaN	14.3049	NaN	NaN	NaN	16.0051	16.0558	NaN	NaN	12.3308	NaN	15.2284	NaN	14.9604	NaN	NaN	NaN	15.6004	14.7291	NaN
1018	LYAGASGGTLDW	12	605.792	2	12.3993	13.2416	NaN	NaN	NaN	NaN	NaN	11.4196	NaN	NaN	NaN	NaN	14.1331	NaN	NaN	NaN	NaN	11.9899	12.6719	13.0417	NaN	NaN	11.7572	11.4214
1019	SGNENEFRDM	10	607.743	2	NaN	8.94872	NaN	12.1763	12.7247	12.6823	NaN	12.7763	9.81425	12.4777	11.9372	11.2424	NaN	NaN	NaN	11.9174	9.66224	11.165	10.2485	10.9126	NaN	11.9202	11.19	12.875
1020	VSLGGFELTPPV	12	608.335	2	NaN	11.139	NaN	NaN	13.9105	NaN	NaN	NaN	12.6107	NaN	12.7548	12.4881	NaN	9.13716	NaN	NaN	12.6591	13.2004	12.7444	11.251	NaN	NaN	13.4581	13.69
1021	KTEAPADKDEL	11	608.808	2	13.9624	NaN	13.6012	NaN	11.0925	NaN	NaN	NaN	NaN	10.6391	NaN	NaN	11.4509	12.5894	NaN	NaN	11.8091	11.3416	11.9921	NaN	11.5484	NaN	10.5822	NaN
1022	DLALEKDYVR	10	407.888	3	10.8886	10.5806	9.89968	NaN	14.3609	14.0441	7.62566	14.1748	NaN	13.2051	NaN	NaN	13.0566	NaN	NaN	12.2024	12.4185	13.8554	NaN	NaN	NaN	NaN	13.4316	NaN
1023	TGFLNWLEEL	10	611.805	2	NaN	NaN	NaN	NaN	NaN	NaN	NaN	NaN	NaN	7.68073	NaN	NaN	NaN	NaN	NaN	8.09391	6.41917	NaN	7.8648	NaN	NaN	NaN	7.60491	NaN
1024	APVLSDSQHACP	12	408.859	3	NaN	NaN	NaN	NaN	NaN	NaN	NaN	NaN	NaN	NaN	NaN	NaN	11.4525	NaN	NaN	11.3609	11.7777	12.082	NaN	12.0338	NaN	10.6267	11.381	NaN
1025	KSLVVHQDWN	10	613.323	2	NaN	NaN	NaN	NaN	NaN	NaN	NaN	NaN	NaN	NaN	NaN	NaN	NaN	NaN	NaN	NaN	NaN	NaN	NaN	NaN	NaN	NaN	8.44128	8.20096
1026	NPSVGPWWER	10	409.873	3	12.7757	NaN	NaN	15.8203	16.2711	NaN	NaN	14.8649	13.2863	13.7402	NaN	10.8117	14.021	12.3349	13.1497	14.6273	NaN	15.2266	NaN	14.666	14.4643	14.5781	15.7605	15.577
1027	LLYTNGPLPDK	11	615.841	2	NaN	NaN	NaN	NaN	10.5797	10.3409	NaN	NaN	NaN	9.13306	NaN	NaN	NaN	NaN	NaN	NaN	NaN	9.86855	NaN	NaN	NaN	NaN	10.2332	9.98339
1028	ETLLYHVLDM	10	617.313	2	NaN	NaN	NaN	NaN	NaN	NaN	NaN	NaN	NaN	NaN	NaN	NaN	NaN	NaN	NaN	NaN	NaN	NaN	NaN	NaN	NaN	NaN	10.1118	9.70867
1029	KLTEDYGQDPA	11	618.792	2	16.5692	16.9711	15.8766	17.3948	17.3217	16.906	12.509	17.4193	16.7647	17.9967	17.5074	17.5951	16.9734	15.1497	16.4622	17.5147	16.8735	17.6346	17.553	17.2904	16.8994	17.4076	17.0001	17.0303
1030	YGFLLPESQLA	11	619.327	2	9.06683	9.87797	8.71587	NaN	NaN	10.0917	NaN	NaN	NaN	9.70955	10.0648	9.67327	8.88497	8.06539	NaN	10.2825	10.5701	11.2516	10.9956	NaN	10.3512	10.3965	10.1556	NaN
1031	SAYLNWLDQK	10	619.807	2	11.2009	11.6701	10.5242	12.927	12.8234	12.3624	NaN	13.306	11.1872	NaN	12.2441	NaN	11.0988	NaN	NaN	13.7008	12.8037	13.566	11.0901	NaN	10.0093	12.0201	12.6077	12.7477
1032	TGYTQASQNLR	11	619.811	2	NaN	NaN	NaN	NaN	10.5676	10.2739	NaN	10.6182	NaN	NaN	NaN	NaN	11.2689	NaN	NaN	9.32289	10.3235	10.11	NaN	NaN	NaN	NaN	9.87146	10.9277
1033	YNSEGTLDNDL	11	620.778	2	NaN	12.1526	11.2535	11.7831	NaN	13.3792	NaN	13.1022	11.0521	12.0711	10.7231	10.7548	NaN	NaN	NaN	11.2564	10.8459	11.2527	11.2795	12.5862	11.6577	12.4751	12.6229	12.9837
1034	NSYVQLGVLPR	11	623.352	2	11.5658	12.4243	11.0594	11.7796	12.7569	12.3816	NaN	12.7309	NaN	13.0458	11.4296	10.5168	12.6398	NaN	10.2751	12.5788	12.3774	12.3084	NaN	10.7695	NaN	11.1023	12.3835	12.7776
1035	NTGGGEFPAGSRP	13	623.803	2	16.3278	16.6212	16.2238	NaN	NaN	NaN	NaN	NaN	NaN	NaN	NaN	NaN	15.7211	NaN	NaN	NaN	NaN	NaN	NaN	16.217	NaN	NaN	14.9002	NaN
1036	VGGENAVPHSWP	12	625.304	2	NaN	NaN	NaN	11.5999	12.2623	NaN	NaN	NaN	11.6201	NaN	13.4124	13.6145	NaN	NaN	NaN	12.6647	NaN	13.0005	12.0612	NaN	NaN	12.9339	12.2787	12.189
1037	VDFVNDHGNLK	11	419.881	3	NaN	13.0572	12.4235	15.4193	14.9894	13.9119	NaN	NaN	14.9401	15.8758	15.1429	15.596	14.0994	NaN	14.119	NaN	13.7999	14.9219	14.7164	13.9142	NaN	15.313	15.294	14.4901
1038	QLLLYPYGYK	10	629.347	2	NaN	NaN	NaN	NaN	11.8331	11.5857	NaN	11.9709	NaN	NaN	NaN	NaN	NaN	NaN	NaN	13.5172	12.857	13.9511	NaN	NaN	NaN	NaN	11.9618	12.2858
1039	FGLVFNNDDSM	11	629.773	2	9.29824	NaN	NaN	NaN	9.62933	NaN	NaN	NaN	NaN	8.99616	NaN	8.64385	NaN	NaN	NaN	9.00407	NaN	NaN	NaN	NaN	NaN	10.3718	9.44163	NaN
1040	YSWFLNSNDL	10	629.791	2	7.4965	NaN	NaN	NaN	10.9627	10.9132	NaN	11.5808	NaN	12.7019	11.4179	NaN	NaN	NaN	NaN	11.6063	10.5562	11.3875	NaN	NaN	NaN	NaN	11.1427	11.6425
1041	VDLNGLWEGTR	11	630.816	2	10.8935	10.8064	NaN	NaN	10.6145	10.9331	NaN	10.614	NaN	10.9605	NaN	NaN	NaN	NaN	NaN	NaN	10.9438	11.9568	NaN	NaN	NaN	NaN	11.2397	NaN
1042	LKFSTGGNNRAP	12	421.228	3	NaN	NaN	NaN	9.01966	NaN	8.6992	NaN	NaN	7.62391	9.21818	9.44171	8.72727	NaN	NaN	NaN	9.26098	7.86461	9.85012	8.82818	NaN	NaN	8.59398	9.36104	9.25678
1043	TSAFLDCCFEE	11	632.746	2	NaN	NaN	NaN	NaN	9.57802	NaN	NaN	8.72893	10.1487	11.9963	NaN	NaN	NaN	NaN	NaN	NaN	9.8736	NaN	9.05937	NaN	NaN	NaN	10.5814	9.20953
1044	VTGGPSRWPWE	11	636.313	2	NaN	NaN	NaN	NaN	NaN	NaN	NaN	NaN	NaN	NaN	NaN	NaN	NaN	NaN	NaN	NaN	NaN	13.8211	NaN	NaN	14.9343	NaN	13.2138	12.9289
1045	QEVLNLGGEALK	12	636.347	2	11.0548	11.4272	NaN	NaN	NaN	NaN	NaN	10.7042	NaN	10.6387	NaN	NaN	12.6433	10.975	13.0904	11.1918	NaN	NaN	NaN	11.7946	11.0946	10.7573	10.6533	NaN
1046	LTEELYNFMD	10	638.276	2	NaN	NaN	NaN	NaN	NaN	NaN	NaN	NaN	NaN	NaN	NaN	10.3615	NaN	9.92592	NaN	NaN	10.7918	NaN	NaN	NaN	NaN	11.007	9.81551	10.3437
1047	LALDNLDLFLE	11	638.346	2	12.2997	13.8517	11.2147	14.8086	15.0243	14.3634	NaN	14.8296	13.1682	14.4215	14.3604	13.372	12.3639	12.0938	11.9588	15.0337	12.3791	14.5709	14.2512	14.1279	13.7094	14.6476	14.2632	14.7729
1048	SAVAALTSLYGTK	13	641.356	2	NaN	12.7514	11.9998	NaN	NaN	NaN	NaN	12.0014	NaN	NaN	NaN	NaN	NaN	NaN	NaN	NaN	12.8751	NaN	NaN	NaN	NaN	NaN	11.9989	12.5638
1049	TLEELYDFMK	10	644.811	2	NaN	NaN	NaN	NaN	NaN	NaN	NaN	10.2492	NaN	9.12357	NaN	NaN	NaN	NaN	NaN	NaN	8.8805	NaN	NaN	NaN	NaN	NaN	9.84434	10.0091
1050	LFAGEVLDLGGEA	13	645.833	2	NaN	16.4287	14.7097	NaN	NaN	NaN	NaN	NaN	NaN	16.1342	16.3624	NaN	NaN	NaN	NaN	NaN	NaN	NaN	NaN	NaN	NaN	NaN	15.6512	NaN
1051	LFQEVLNLGGEA	12	645.833	2	15.8919	16.4287	NaN	16.9069	16.1747	NaN	NaN	16.2116	16.7509	16.1342	NaN	16.4466	16.6773	15.6271	17.1295	15.8304	14.5001	15.0243	16.8439	16.6843	17.201	17.4467	15.6512	15.6782
1052	YGFLLPESQLQ	11	647.838	2	11.8167	12.5433	11.1988	12.2578	12.6284	11.7903	NaN	12.4276	11.7305	13.3849	12.2475	12.0068	11.5854	10.5374	12.2684	13.0013	12.9344	13.249	13.2544	12.741	12.1523	12.3882	12.3957	12.4099
1053	TFLGNNLYLLK	11	648.372	2	NaN	NaN	NaN	10.7242	11.8541	11.3993	NaN	12.7349	NaN	9.53756	NaN	NaN	9.69822	NaN	NaN	11.0807	11.4384	11.9698	NaN	NaN	NaN	NaN	11.9878	12.6228
1054	SLQYLSGDTDAK	12	649.326	2	13.4198	NaN	NaN	14.222	NaN	NaN	9.04245	14.9607	NaN	NaN	NaN	NaN	NaN	NaN	12.825	14.4502	NaN	NaN	NaN	NaN	NaN	NaN	14.6956	NaN
1055	ALLDNLSYFLE	11	649.337	2	7.1802	NaN	NaN	NaN	NaN	NaN	NaN	NaN	8.21991	NaN	NaN	NaN	NaN	NaN	NaN	NaN	NaN	NaN	NaN	NaN	NaN	9.50979	9.22405	NaN
1056	NSMVSCCCAGGDGV	14	651.744	2	NaN	12.8598	12.1469	12.9232	13.0214	NaN	NaN	NaN	NaN	11.6489	12.527	NaN	10.9108	NaN	NaN	12.8569	NaN	13.6619	NaN	NaN	12.782	13.5128	12.7144	NaN
1057	NFVNGQDVNDW	11	654.287	2	15.0679	15.6784	15.0875	NaN	12.0924	12.8378	NaN	NaN	NaN	NaN	NaN	NaN	16.0243	16.1784	15.8012	11.9272	NaN	NaN	NaN	14.481	14.3119	11.7268	11.3134	NaN
1058	GFFQDLQDKDV	11	656.315	2	NaN	NaN	NaN	10.226	10.3375	NaN	NaN	9.53063	NaN	NaN	NaN	NaN	NaN	NaN	NaN	9.77421	NaN	NaN	NaN	NaN	NaN	NaN	10.3929	10.2319
1059	LTNSMLCCSGASQ	13	657.781	2	NaN	NaN	NaN	NaN	NaN	NaN	NaN	NaN	NaN	NaN	NaN	NaN	NaN	NaN	NaN	NaN	NaN	NaN	11.9362	12.1632	11.3144	NaN	9.9454	NaN
1060	LAEPVELSDTLK	12	657.862	2	8.67523	NaN	NaN	NaN	NaN	NaN	NaN	10.2309	NaN	10.6066	NaN	NaN	9.41311	NaN	NaN	9.84667	NaN	9.5577	NaN	NaN	NaN	NaN	9.77572	NaN
1061	DAAPLLPNLGFGM	13	658.34	2	NaN	8.67251	NaN	NaN	NaN	NaN	NaN	NaN	NaN	NaN	NaN	NaN	8.83562	NaN	NaN	8.9456	NaN	9.77908	NaN	NaN	NaN	NaN	8.48672	NaN
1062	TLQVNNTDAEGR	12	659.818	2	10.4173	NaN	NaN	11.3326	11.1871	10.8379	NaN	11.4796	NaN	11.4887	NaN	NaN	NaN	NaN	10.8716	11.131	NaN	NaN	NaN	10.9169	10.1013	NaN	10.7705	10.9975
1063	LQLGSSYEGRPL	12	660.352	2	14.2207	NaN	NaN	11.9883	16.0122	16.5416	NaN	16.8875	NaN	17.0962	13.1846	13.4277	13.6844	NaN	NaN	16.2321	15.9379	16.535	NaN	NaN	NaN	11.872	15.8241	16.7301
1064	TSAFLDWLEEL	11	662.328	2	9.51338	NaN	11.3915	14.382	NaN	14.1216	6.27285	14.9246	12.3175	13.6088	12.9295	11.442	14.4513	10.2903	12.9523	14.2157	11.9391	14.0483	13.1401	11.5427	NaN	13.7201	13.349	14.4759
1065	TSAFLDWLQEL	11	662.328	2	NaN	14.5092	NaN	NaN	14.5727	NaN	NaN	14.9246	NaN	NaN	NaN	11.442	NaN	10.2903	12.9523	14.2157	NaN	14.0483	NaN	NaN	14.1142	13.7201	13.349	NaN
1066	SLQYNSSGQWR	11	663.809	2	NaN	NaN	NaN	NaN	12.6743	12.5587	NaN	13.1507	NaN	NaN	NaN	NaN	11.7803	NaN	NaN	NaN	NaN	NaN	NaN	NaN	NaN	NaN	12.0481	12.6527
1067	ALGQATAQALEEK	13	665.355	2	NaN	NaN	NaN	NaN	NaN	NaN	NaN	NaN	NaN	NaN	NaN	NaN	NaN	NaN	NaN	NaN	NaN	NaN	NaN	NaN	NaN	NaN	9.71773	10.2757
1068	ETAPADKDELDQ	12	666.304	2	12.2886	13.3436	NaN	12.186	NaN	NaN	NaN	12.1887	11.886	11.5868	NaN	10.9588	12.5744	12.5158	NaN	12.2909	11.7352	12.8007	NaN	NaN	13.1264	12.2258	12.4419	13.0529
1069	MLGFGVQGLLTGK	13	668.869	2	NaN	NaN	NaN	NaN	NaN	NaN	NaN	NaN	NaN	NaN	NaN	NaN	NaN	NaN	NaN	NaN	NaN	NaN	NaN	NaN	NaN	9.24615	10.416	10.8154
1070	VSAYLDWLDQK	11	446.564	3	6.98632	8.75744	12.6103	NaN	9.40824	NaN	NaN	11.3487	NaN	11.612	NaN	NaN	NaN	NaN	NaN	10.9159	10.872	11.0782	NaN	NaN	NaN	NaN	10.1332	11.1279
1071	TLNWTYNQGLK	11	669.84	2	NaN	NaN	NaN	NaN	NaN	NaN	NaN	NaN	NaN	NaN	NaN	NaN	NaN	NaN	NaN	10.8945	NaN	11.4072	NaN	NaN	NaN	11.2117	11.3089	NaN
1072	TSAFLDMALEEL	12	670.325	2	8.8089	NaN	NaN	9.76661	9.92171	9.45615	NaN	NaN	NaN	NaN	NaN	NaN	NaN	NaN	9.66804	NaN	NaN	9.82361	NaN	NaN	NaN	10.4112	9.75084	10.2207
1073	SQLLLYPYGYK	11	672.864	2	12.7573	13.1564	12.0248	14.5159	15.8715	15.5722	8.71558	15.7005	NaN	15.1134	NaN	NaN	14.5715	NaN	NaN	14.6507	14.158	14.6018	NaN	NaN	NaN	NaN	15.854	15.4132
1074	PAGSRFPLFQEV	12	674.356	2	NaN	NaN	NaN	NaN	11.2541	10.7725	NaN	NaN	NaN	NaN	NaN	NaN	NaN	NaN	NaN	NaN	NaN	NaN	NaN	NaN	NaN	NaN	11.1584	NaN
1075	VVGGENAVPHSWP	13	674.837	2	16.1228	15.948	15.2622	16.003	16.6868	16.1373	10.8315	15.7857	15.8706	17.92	18.0089	18.0839	14.568	15.4848	15.097	17.3892	15.7645	17.3629	16.9762	16.9652	15.6578	17.5082	16.837	16.6969
1076	SAGENFDKLVSGK	13	451.234	3	10.4663	10.9389	NaN	11.2956	12.0172	11.5247	NaN	12.0767	10.5153	12.04	NaN	10.6878	10.9012	NaN	NaN	11.4692	10.645	11.6269	NaN	10.8699	NaN	11.6837	11.7627	11.8056
1077	FGLVFNNDDWQ	11	677.807	2	NaN	12.4409	10.651	14.432	13.7613	13.5938	NaN	14.744	13.2163	11.6065	NaN	NaN	13.7678	8.8136	12.1253	11.8243	10.8894	11.2958	12.1014	12.1435	12.6473	13.1873	13.152	NaN
1078	TSAFLDSMLEEL	12	678.324	2	12.0127	9.70968	11.5893	12.9135	11.4458	11.0653	NaN	9.97655	NaN	NaN	9.35307	NaN	NaN	NaN	13.0187	9.39016	8.51256	10.2913	NaN	14.1652	NaN	11.1297	9.81023	12.9258
1079	QVTSENPNLLSR	12	679.852	2	NaN	NaN	NaN	12.6609	13.4084	NaN	NaN	NaN	NaN	15.4125	NaN	NaN	NaN	NaN	NaN	NaN	NaN	NaN	NaN	NaN	NaN	NaN	13.2121	NaN
1080	YSWFLNSNDLT	11	680.315	2	NaN	12.5499	NaN	NaN	14.5828	14.7246	NaN	15.7132	NaN	15.4929	NaN	NaN	NaN	NaN	NaN	14.6293	13.9575	14.4382	NaN	NaN	NaN	NaN	14.5161	15.0422
1081	DSLFVHEKWNS	11	454.555	3	NaN	NaN	NaN	13.0785	12.9042	12.397	NaN	NaN	NaN	NaN	11.3062	NaN	NaN	NaN	NaN	NaN	NaN	NaN	NaN	NaN	NaN	NaN	11.9675	11.3262
1082	VVGGENALPHSWP	13	681.845	2	15.4798	15.4181	14.7214	14.6027	15.2873	14.7404	9.30213	14.3468	14.5067	17.0557	17.2724	17.244	13.9326	15.0119	14.4155	16.6135	15.2567	16.5935	16.4108	16.3819	15.1871	16.108	15.3859	15.228
1083	AAVKELATLYGTK	13	455.599	3	12.0334	13.0854	11.8518	9.87051	10.823	NaN	NaN	12.1641	NaN	13.4661	NaN	NaN	NaN	NaN	NaN	10.805	12.9841	13.322	NaN	NaN	9.59131	NaN	10.7696	11.4283
1084	YGFLLPESQLQA	12	683.356	2	12.8985	NaN	12.1707	NaN	NaN	NaN	NaN	NaN	12.8943	NaN	NaN	NaN	13.6587	NaN	13.2208	13.5295	13.9591	13.8834	14.318	14.014	13.9573	12.8192	13.2399	NaN
1085	LSFLYVEKEEL	11	685.368	2	NaN	NaN	NaN	NaN	NaN	NaN	NaN	NaN	NaN	NaN	NaN	NaN	NaN	NaN	NaN	NaN	NaN	NaN	NaN	NaN	NaN	NaN	9.26787	9.3646
1086	HGKFPNSEVEVK	12	685.859	2	NaN	14.3115	16.334	18.2465	17.7851	16.9742	NaN	NaN	15.8811	17.0755	NaN	14.4592	NaN	NaN	16.8306	16.5155	15.9761	16.2253	14.8524	17.4489	16.8438	NaN	14.0663	16.1245
1087	LVDLVDELDKDT	12	687.855	2	11.091	10.6887	10.1411	10.4365	10.4153	9.80232	NaN	10.3763	9.46937	NaN	9.92465	10.4722	NaN	NaN	NaN	11.382	10.9495	11.6333	10.9047	11.3909	10.976	9.54231	10.2012	10.2782
1088	VVGGEDARNPSWP	13	692.337	2	NaN	NaN	NaN	NaN	NaN	NaN	NaN	13.4335	NaN	NaN	NaN	NaN	NaN	NaN	NaN	NaN	NaN	14.9033	NaN	NaN	NaN	15.0989	13.8168	NaN
1089	YSWFLNSNDLK	11	693.838	2	NaN	NaN	NaN	NaN	10.3559	NaN	NaN	NaN	NaN	9.33667	NaN	NaN	NaN	NaN	NaN	9.32409	NaN	9.60963	NaN	NaN	NaN	NaN	10.45	10.5843
1090	LTEELYDFMDL	11	694.819	2	9.81509	12.3453	9.91414	9.68382	12.1793	11.644	NaN	13.7802	12.223	12.8752	11.7157	11.2934	13.9097	11.032	13.5961	13.2424	11.9016	12.6773	8.75418	10.834	12.9328	12.6298	11.8099	12.3423
1091	DAAPLLPNLGFGMS	14	701.856	2	9.78103	11.0993	NaN	NaN	NaN	NaN	NaN	NaN	NaN	NaN	9.7632	8.62183	NaN	NaN	9.2297	NaN	NaN	12.1653	NaN	11.5742	NaN	NaN	10.5746	NaN
1092	LTEELYDFMDL	11	702.815	2	10.0513	9.43636	NaN	13.2331	12.5235	12.425	NaN	13.0718	11.9487	12.1683	11.5776	10.7499	11.4065	10.2166	11.864	12.0105	10.7498	11.6309	11.5793	11.1989	10.9057	13.0274	12.0371	12.7985
1093	LLTLMEHTLNHP	12	473.587	3	NaN	12.9976	11.6608	NaN	12.7417	12.5418	NaN	13.133	NaN	13.2276	12.2676	11.9886	12.597	NaN	NaN	13.2511	12.9223	14.0025	10.1246	12.4898	NaN	12.4639	12.7641	NaN
1094	LTEELYDMYDL	11	710.814	2	NaN	NaN	NaN	9.59379	NaN	8.87523	NaN	9.0636	7.84402	NaN	7.73175	NaN	NaN	NaN	NaN	NaN	NaN	NaN	NaN	NaN	NaN	9.03724	7.83292	9.01
1095	RDSLFVHEKWN	11	477.574	3	NaN	NaN	NaN	NaN	10.5482	NaN	NaN	10.7752	NaN	10.3836	9.5457	NaN	NaN	NaN	NaN	NaN	9.81572	NaN	NaN	NaN	NaN	NaN	9.80883	NaN
1096	TNLVDLDGLWEGT	13	716.852	2	NaN	NaN	NaN	NaN	NaN	NaN	NaN	NaN	11.1714	NaN	12.235	11.6622	NaN	NaN	NaN	12.8121	12.6724	NaN	NaN	NaN	NaN	NaN	10.785	NaN
1097	VGGENAVPHSWPW	13	718.342	2	NaN	NaN	NaN	NaN	12.688	12.4728	NaN	12.0422	11.7158	10.6241	NaN	NaN	NaN	NaN	NaN	11.4869	NaN	12.1465	12.2387	NaN	12.1382	NaN	12.4189	NaN
1098	LPENNAELNNLAK	13	720.379	2	11.3321	10.912	10.6498	12.0613	11.7943	11.365	NaN	11.9861	NaN	11.3238	NaN	NaN	12.1332	NaN	11.661	11.2079	11.0535	11.8142	NaN	NaN	10.3003	NaN	11.4888	11.4185
1099	YSNYKLPENNAE	12	721.827	2	NaN	NaN	NaN	NaN	NaN	NaN	NaN	NaN	NaN	16.2621	NaN	NaN	NaN	NaN	NaN	NaN	NaN	NaN	NaN	NaN	NaN	NaN	14.3517	14.0256
1100	TSAFLNWLEELK	12	726.375	2	NaN	8.11045	NaN	8.0357	8.49998	NaN	NaN	NaN	NaN	7.64064	NaN	NaN	NaN	NaN	NaN	NaN	NaN	NaN	NaN	NaN	8.01508	7.70682	8.10397	8.19443
1101	NTLNWTYNQGLK	12	726.861	2	NaN	NaN	NaN	12.9915	12.8603	12.0976	NaN	NaN	11.4909	12.251	11.9273	12.2196	NaN	NaN	NaN	12.5211	11.1692	12.8708	11.8968	11.4919	11.7658	12.8543	12.6286	13.0759
1102	GYESHMTEFLNK	12	485.893	3	NaN	NaN	NaN	11.3096	10.853	9.07029	NaN	10.9532	NaN	9.5204	NaN	NaN	12.1188	NaN	9.69621	NaN	NaN	9.02739	NaN	NaN	NaN	NaN	10.1304	9.77549
1103	LVVHPYWNTDDV	12	729.357	2	NaN	NaN	NaN	NaN	16.8392	16.3893	NaN	16.0878	15.6042	16.781	17.5433	NaN	15.9051	NaN	NaN	16.7263	16.1032	16.6319	15.7742	NaN	NaN	NaN	16.6338	16.4112
1104	LVVHPYWNTDNV	12	729.357	2	15.1598	15.9745	NaN	16.6673	NaN	NaN	NaN	NaN	NaN	NaN	NaN	NaN	NaN	NaN	NaN	16.7263	NaN	16.6319	NaN	NaN	NaN	17.0806	16.6338	16.4112
1105	SLVDFVNDHGGGLK	14	486.585	3	16.6713	16.7142	15.836	17.1519	16.4113	NaN	11.2217	16.5452	16.1935	17.7037	16.32	16.8715	17.3105	15.1331	17.0499	17.1079	16.6782	17.0718	16.7169	16.1312	16.8443	16.8871	16.6968	16.2338
1106	TLNSYVQLGVLPR	13	730.417	2	NaN	NaN	NaN	NaN	13.1953	12.5235	NaN	NaN	NaN	12.7781	NaN	NaN	NaN	NaN	NaN	NaN	12.9678	13.197	NaN	NaN	NaN	NaN	14.5446	NaN
1107	NLNTNWFPAGSRP	13	737.367	2	13.5798	NaN	NaN	NaN	NaN	NaN	NaN	NaN	NaN	NaN	NaN	NaN	13.2788	NaN	12.8136	NaN	11.6426	10.9578	NaN	13.812	13.1092	NaN	10.8529	NaN
1108	AGGSDNWAYDQGLK	14	741.829	2	13.6113	NaN	13.0622	NaN	15.7968	15.1724	10.1872	15.1687	NaN	NaN	16.247	16.0628	NaN	NaN	13.5951	15.9802	15.9695	16.5885	16.5581	15.997	15.8304	15.7829	15.3535	NaN
1109	WYNNVLNPTLPR	12	743.895	2	NaN	NaN	NaN	11.6669	12.3383	NaN	NaN	12.06	NaN	12.1284	NaN	10.5366	NaN	NaN	NaN	13.3501	13.4491	13.7226	12.1455	12.1435	NaN	12.3216	12.8349	13.2118
1110	TTAQVAAEASALATAK	16	752.403	2	NaN	NaN	NaN	NaN	NaN	NaN	NaN	NaN	NaN	NaN	NaN	NaN	NaN	NaN	NaN	NaN	NaN	NaN	NaN	NaN	NaN	NaN	9.04728	10.7659
1111	GLLDLALEKDYVR	13	502.284	3	NaN	NaN	NaN	9.72738	10.6186	NaN	NaN	10.9072	NaN	NaN	NaN	NaN	NaN	NaN	NaN	NaN	NaN	NaN	NaN	NaN	NaN	NaN	10.5639	10.7166
1112	FLLHGFLDKGEED	13	507.255	3	12.9636	13.5974	12.497	NaN	NaN	NaN	NaN	11.4929	11.9982	12.6938	13.0596	10.7459	NaN	NaN	NaN	13.4843	11.6011	13.6534	14.0177	14.4915	13.8634	12.9099	12.3255	12.5425
1113	SLVDFVNDHGNLKA	14	764.893	2	NaN	15.0947	13.7104	14.7144	15.764	15.3177	NaN	NaN	NaN	NaN	13.5726	NaN	15.5781	NaN	NaN	NaN	15.2054	15.3589	NaN	NaN	NaN	NaN	11.8387	14.978
1114	LTNSMLSCCGSAGASQ	16	765.326	2	NaN	NaN	NaN	NaN	NaN	NaN	NaN	NaN	12.9182	12.6585	NaN	NaN	NaN	NaN	NaN	NaN	NaN	NaN	14.0461	NaN	13.8152	NaN	12.6415	NaN
1115	LFQEVLNLGGEALK	14	766.422	2	13.278	14.043	12.352	13.8283	13.0467	12.7319	NaN	12.992	12.202	12.6632	11.0471	11.4249	15.931	12.1224	15.2034	13.1102	11.8919	11.84	12.0166	13.8363	13.8852	13.9103	12.7645	12.738
1116	VVGGENAVPHSWPW	14	767.876	2	15.0242	16.5013	14.7629	16.9679	16.9947	16.6623	9.18257	16.7961	15.6878	15.23	14.1717	13.4351	17.2162	14.2374	16.6947	15.9409	15.5012	16.2639	16.7816	16.6034	16.9166	16.3572	16.6445	16.5777
1117	SGGTLNWTYNGAGLK	15	770.377	2	11.2264	NaN	11.1277	15.558	15.0636	14.7234	NaN	NaN	14.4508	14.9888	14.4852	14.6053	NaN	NaN	NaN	15.3965	NaN	15.593	14.6594	NaN	14.3987	15.6718	15.5006	15.1248
1118	QNYHQDSEAALNR	13	515.908	3	NaN	NaN	NaN	NaN	NaN	NaN	NaN	8.85773	NaN	10.1279	NaN	NaN	NaN	NaN	NaN	NaN	NaN	9.85564	NaN	NaN	NaN	NaN	9.14878	9.18736
1119	VVVSGEALTDAANESS	16	774.875	2	NaN	NaN	NaN	NaN	NaN	NaN	NaN	NaN	NaN	NaN	NaN	NaN	NaN	NaN	NaN	NaN	NaN	NaN	NaN	NaN	NaN	12.0243	10.1398	NaN
1120	VVGGENALPHSWPW	14	774.884	2	13.8534	15.739	NaN	15.3857	15.4107	15.0315	NaN	15.2633	NaN	14.1103	NaN	12.1098	16.3252	12.8826	15.5949	15.0272	14.747	15.3376	15.9447	15.7924	16.2143	14.7464	15.0371	15.0522
1121	SGNENEFRDMVTR	13	518.906	3	NaN	11.6897	NaN	13.7007	15.0646	14.6842	NaN	16.3906	NaN	15.1595	NaN	NaN	13.5001	NaN	NaN	NaN	14.2483	NaN	NaN	NaN	NaN	NaN	13.7473	15.522
1122	FGLVFNNNDWQLS	13	777.865	2	NaN	NaN	NaN	NaN	NaN	14.2667	NaN	NaN	NaN	NaN	NaN	NaN	NaN	NaN	13.1128	NaN	NaN	NaN	NaN	NaN	NaN	NaN	13.8069	14.1861
1123	LYTNGPLPDKLQQA	14	779.419	2	NaN	NaN	11.1114	13.8336	13.3478	13.5655	NaN	13.957	NaN	NaN	NaN	NaN	14.0979	NaN	NaN	NaN	NaN	NaN	NaN	13.213	NaN	NaN	12.2464	12.55
1124	VVGGENAVPHSWPAM	15	783.872	2	NaN	NaN	NaN	NaN	NaN	NaN	NaN	NaN	NaN	NaN	NaN	NaN	NaN	NaN	NaN	NaN	NaN	NaN	NaN	NaN	NaN	11.3722	11.1135	NaN
1125	YDFMDLLVAEHPQ	13	526.582	3	NaN	9.58981	NaN	11.0571	NaN	NaN	NaN	11.671	10.0383	11.5366	NaN	10.355	10.9731	NaN	NaN	10.7665	9.35751	NaN	NaN	8.32508	9.35446	NaN	9.80171	10.0081
1126	SGGLESYNNPYQVR	14	528.916	3	NaN	NaN	NaN	NaN	NaN	11.8485	NaN	NaN	NaN	NaN	NaN	NaN	NaN	NaN	NaN	NaN	NaN	NaN	NaN	NaN	NaN	NaN	10.3831	11.8793
1127	LVVHPYWNTDDVK	13	529.273	3	NaN	10.4892	NaN	12.0974	12.5979	12.2558	NaN	11.3762	NaN	10.7103	NaN	NaN	NaN	NaN	NaN	NaN	NaN	12.1162	NaN	NaN	NaN	10.4775	12.3377	12.1108
1128	NWGEGSMGFMPSDR	14	793.822	2	NaN	NaN	NaN	NaN	14.2442	NaN	NaN	NaN	NaN	NaN	NaN	11.6926	NaN	NaN	NaN	NaN	NaN	13.4467	11.5556	12.162	NaN	NaN	14.25	NaN
1129	TNPNGFAFTHSENR	14	531.576	3	NaN	NaN	NaN	11.9634	NaN	16.4929	NaN	15.1762	NaN	12.7773	NaN	NaN	NaN	NaN	NaN	14.4628	13.5464	NaN	NaN	NaN	NaN	NaN	16.1261	NaN
1130	QSPNGFAFTHSENR	14	531.576	3	NaN	NaN	NaN	NaN	16.4296	16.4929	NaN	NaN	NaN	NaN	NaN	NaN	NaN	NaN	NaN	NaN	NaN	15.7513	NaN	NaN	NaN	NaN	16.1261	NaN
1131	ASGGTLNWTYNQGLK	15	805.896	2	NaN	NaN	NaN	12.1431	12.7646	11.9912	NaN	NaN	10.7847	12.577	12.2567	11.7835	NaN	NaN	NaN	13.6727	12.4722	13.6976	NaN	11.3627	NaN	12.648	12.6241	12.6986
1132	LMKEVLDLGGEALQS	15	809.92	2	13.7774	14.4091	NaN	14.728	NaN	13.3	NaN	14.3304	NaN	NaN	13.1287	12.8008	15.7308	10.669	NaN	NaN	11.8583	NaN	13.8836	NaN	NaN	NaN	13.1475	13.3806
1133	VVVGEHNLNQNDGTE	15	812.884	2	NaN	13.4953	13.0978	13.5446	NaN	NaN	8.60205	NaN	13.9514	14.4491	NaN	16.1941	NaN	13.4719	12.5241	14.3887	NaN	14.4725	NaN	14.7843	13.9063	NaN	13.4255	NaN
1134	LSGPQAGLGEYLFER	15	818.919	2	NaN	NaN	NaN	NaN	NaN	NaN	NaN	10.27	NaN	10.2291	NaN	NaN	NaN	NaN	NaN	NaN	NaN	9.97722	NaN	NaN	NaN	NaN	9.63212	9.81556
1135	HTDAAPLLPNLGFGMS	16	820.909	2	13.5807	15.3103	13.0904	12.5424	13.5306	13.054	NaN	NaN	11.25	13.9395	12.2369	11.1926	12.7011	NaN	12.2662	14.2557	14.8789	15.2115	NaN	NaN	NaN	12.8803	13.5005	13.5582
1136	VLGEYDRSENEGFE	14	822.365	2	NaN	NaN	NaN	NaN	12.1608	NaN	NaN	NaN	NaN	NaN	NaN	NaN	NaN	NaN	NaN	11.3022	NaN	NaN	NaN	NaN	NaN	NaN	11.8355	12.307
1137	PAAGGSDDWAYDQGLK	16	825.876	2	NaN	NaN	NaN	NaN	10.7361	9.87389	NaN	NaN	9.50051	NaN	10.7277	NaN	NaN	NaN	10.4511	NaN	10.5796	11.0754	11.0959	10.76	NaN	NaN	10.4346	NaN
1138	ASGGLESYNDPYQVR	15	828.388	2	10.4086	NaN	9.45889	11.0831	11.8056	12.0061	NaN	11.8703	NaN	10.9681	NaN	NaN	10.0714	NaN	NaN	NaN	NaN	11.9385	NaN	NaN	NaN	NaN	12.4985	12.3138
1139	HTDAAPLLPNLGFGMS	16	828.906	2	11.4217	11.6574	10.5325	NaN	11.4803	NaN	NaN	NaN	NaN	11.8637	11.5844	NaN	NaN	NaN	NaN	12.3558	12.3655	12.8972	12.3753	12.833	NaN	NaN	11.2422	11.5735
1140	TEAPADKDELDQKLS	15	553.942	3	14.7737	NaN	NaN	14.3636	13.9027	NaN	9.17791	NaN	NaN	14.9658	NaN	NaN	NaN	NaN	13.9054	15.0572	NaN	NaN	NaN	NaN	NaN	NaN	13.71	NaN
1141	LVVHQDWNSNQLSK	14	556.623	3	NaN	NaN	NaN	10.5021	10.9106	10.7773	NaN	NaN	NaN	NaN	NaN	NaN	12.2718	NaN	NaN	NaN	9.70659	9.60918	NaN	NaN	NaN	NaN	10.6409	NaN
1142	FGLLPASQLLPTAQET	16	843.458	2	12.9824	12.7838	11.8919	13.604	13.8957	12.1173	NaN	13.0056	11.0824	12.8501	13.6034	12.5632	14.189	10.0354	8.8459	NaN	12.1025	NaN	12.7244	12.9415	10.6442	12.6866	11.1922	11.3211
1143	VALGKNNLEVENEEGS	16	851.913	2	NaN	NaN	NaN	13.819	NaN	NaN	NaN	15.0347	NaN	15.0246	14.9226	NaN	NaN	NaN	NaN	15.2812	14.7422	15.3075	11.8624	NaN	NaN	NaN	12.1606	NaN
1144	VVVSGEALTDAANESSR	17	568.953	3	NaN	NaN	NaN	NaN	NaN	NaN	NaN	NaN	NaN	NaN	NaN	NaN	NaN	NaN	NaN	NaN	NaN	NaN	NaN	NaN	NaN	NaN	10.5769	10.7941
1145	YNSWTLNNDLLLLK	14	854.451	2	NaN	NaN	NaN	NaN	NaN	NaN	NaN	NaN	NaN	NaN	NaN	NaN	10.6024	NaN	NaN	NaN	NaN	NaN	NaN	NaN	NaN	NaN	7.97296	9.03882
1146	YSWFLNSNDLTLLK	14	857.445	2	NaN	NaN	NaN	8.3658	7.9209	8.97729	NaN	11.3436	NaN	NaN	NaN	NaN	NaN	NaN	NaN	NaN	7.6885	8.10611	NaN	NaN	NaN	NaN	9.75204	9.75918
1147	LHNLNTNWFPAGSRP	15	862.439	2	NaN	NaN	NaN	11.8962	NaN	11.8716	NaN	NaN	NaN	NaN	NaN	NaN	NaN	NaN	NaN	11.8411	NaN	11.8223	12.4084	14.2733	NaN	NaN	12.5757	12.3726
1148	QASGGTLNWTYNQGLK	16	869.926	2	13.9003	13.8475	12.7991	NaN	14.5292	13.6348	NaN	13.4604	14.0892	14.0106	14.3762	14.5772	14.6413	9.84668	12.3024	13.5414	12.7407	13.6576	15.5232	14.6147	14.3004	15.2221	13.748	13.3931
1149	TASGGLESYNDPYQVR	16	878.913	2	14.9202	14.3655	13.6698	13.7779	14.2296	14.7278	8.70456	15.2688	NaN	14.4255	NaN	NaN	15.2284	NaN	NaN	13.5997	12.9292	14.6497	NaN	NaN	NaN	NaN	15.2709	15.1961
1150	VTGDCCVGLLDLALEKD	17	588.624	3	NaN	8.40103	NaN	NaN	NaN	NaN	NaN	NaN	NaN	NaN	NaN	NaN	NaN	NaN	NaN	NaN	NaN	NaN	NaN	8.82828	NaN	9.29698	7.92294	NaN
1151	KTEAPADKDELDQLSK	16	447.732	4	14.3611	NaN	NaN	13.2854	12.5315	NaN	8.87723	13.8465	NaN	14.389	NaN	11.2375	14.4278	NaN	11.734	13.9308	NaN	13.27	NaN	13.238	10.5504	13.1251	11.9358	11.6255
1152	NVVDGQPFANWWNNGS	16	903.398	2	NaN	NaN	NaN	NaN	NaN	NaN	NaN	NaN	NaN	NaN	NaN	NaN	NaN	NaN	NaN	NaN	NaN	NaN	NaN	NaN	NaN	NaN	12.9603	14.0499
1153	WGLSTLFQEVLDLGGEA	17	917.972	2	NaN	NaN	NaN	NaN	12.5824	11.711	NaN	NaN	9.43118	NaN	NaN	9.64469	NaN	NaN	NaN	11.9831	NaN	11.5602	NaN	NaN	NaN	11.0902	11.615	NaN
1154	YGYESHMTEFLNKLD	15	616.283	3	NaN	NaN	NaN	9.9305	10.1584	NaN	NaN	NaN	NaN	10.1646	NaN	NaN	NaN	NaN	NaN	9.89001	NaN	NaN	NaN	NaN	NaN	NaN	10.302	10.1915
1155	VNVDGQPFANWWDNGSN	17	960.418	2	NaN	11.1501	NaN	NaN	16.0167	NaN	NaN	12.5543	NaN	16.2515	NaN	NaN	NaN	NaN	NaN	NaN	15.2568	16.5106	NaN	NaN	NaN	NaN	16.3125	17.279
1156	EELYDFMDLLVAEHPQ	16	650.304	3	NaN	9.10602	NaN	9.76251	NaN	8.60094	NaN	10.5288	8.06635	9.88222	9.17584	NaN	9.37725	NaN	NaN	10.4894	8.52781	10.1608	NaN	NaN	NaN	7.91195	7.92501	NaN
1157	GYKTEAPADKDELDQLSK	18	670.004	3	12.2452	12.0921	NaN	12.5362	NaN	NaN	NaN	NaN	NaN	NaN	NaN	NaN	NaN	NaN	NaN	NaN	11.5682	NaN	NaN	NaN	NaN	NaN	11.1036	NaN
1158	LYQASGGTLNWTYNQGLK	18	1008	2	NaN	NaN	10.1824	13.5166	14.6144	13.8603	NaN	14.5329	11.1404	14.3251	12.5445	11.408	NaN	NaN	NaN	13.992	12.8736	14.1207	11.8855	11.7166	NaN	13.2416	14.2954	14.7362
1159	QDGLHLDVLEGNEQFLNAAK	20	737.707	3	17.8434	17.833	17.1269	17.4561	17.8433	17.8339	NaN	17.7887	NaN	16.3482	NaN	NaN	19.268	14.4971	16.6555	17.3851	17.7637	17.8515	NaN	17.6079	15.0877	NaN	17.4573	17.9082
1160	NFVNGQDVNNWLGPPNNNGVLK	22	1206.09	2	14.6869	16.0837	NaN	NaN	NaN	16.6363	NaN	16.7373	NaN	NaN	NaN	NaN	16.2961	NaN	NaN	NaN	15.3698	NaN	15.0441	NaN	NaN	NaN	16.667	16.8145
1161	NFVNGQDVNDWLGPPNNNGVLK	22	1206.09	2	14.6869	NaN	14.0686	NaN	18.58	NaN	NaN	NaN	NaN	NaN	NaN	NaN	NaN	NaN	NaN	NaN	NaN	NaN	NaN	NaN	NaN	16.3468	16.667	NaN
1162	NVVDGQPFANWWDNGSNQVAFGR	23	860.068	3	NaN	NaN	NaN	NaN	NaN	NaN	NaN	NaN	NaN	NaN	NaN	NaN	NaN	NaN	NaN	NaN	NaN	12.5843	NaN	NaN	NaN	NaN	11.6082	13.7145

## Sheet: >10 kDa
Peptides identified in >10 kDa fraction
Row	Peptide	Length	m/z	Mass	z	Arthrospira platensis_1	Arthrospira platensis_2	Arthrospira platensis_3	Chlamydomonas sp._1	Chlamydomonas sp._2	Chlamydomonas sp._3	Desmodesmus arthrodesmiformis_1	Desmodesmus arthrodesmiformis_2	Desmodesmus arthrodesmiformis_3	Glaucocystis Nostochinearum_1	Glaucocystis Nostochinearum_2	Glaucocystis Nostochinearum_3	Nannochloropsis australis_1	Nannochloropsis australis_2	Nannochloropsis australis_3	Pandorina sp._1	Pandorina sp._2	Pandorina sp._3	Rhodomonas salina_1	Rhodomonas salina_2	Rhodomonas salina_3	Snowella sp._1	Snowella sp._2	Snowella sp._3
1	LTEELYDFMDL	11	702.815	1403.62	2	NaN	NaN	NaN	10.3927	7.91969	8.87066	NaN	NaN	NaN	10.1574	10.4134	9.6552	8.58404	NaN	8.36001	NaN	NaN	7.58389	8.54104	NaN	7.90482	10.2735	9.45145	10.5959
2	VVNYATCS	8	457.7	913.385	2	10.3608	NaN	9.46482	11.352	NaN	7.57015	NaN	8.98815	9.30476	11.6459	NaN	11.3796	NaN	NaN	10.2498	NaN	NaN	9.08521	9.65685	NaN	9.42145	10.72	9.68821	NaN
3	CCETHDNC	8	548.168	1094.32	2	14.4596	10.8433	14.255	15.4704	13.5847	13.1537	15.6137	14.2501	14.1756	15.1339	14.5419	14.1668	13.8449	13.9254	14.1693	12.3455	12.8168	13.4787	14.8788	13.2234	14.5748	15.2502	14.5607	13.1381
4	VVDYATCS	8	457.7	913.385	2	10.3608	7.45942	9.46482	11.352	8.50761	NaN	10.5518	NaN	9.30476	11.6459	10.7374	11.3796	9.87181	7.6352	10.2498	7.96601	8.15273	9.08521	9.65685	8.98349	9.42145	10.72	9.68821	9.76698
5	VYVSSDGTAQ	10	513.741	1025.47	2	12.5207	8.79103	12.1641	11.1077	11.6798	11.4926	10.4097	14.6504	9.3483	14.4734	11.2492	9.96751	13.4662	11.0177	9.07222	10.7467	11.1782	11.1998	NaN	10.0815	NaN	10.89	12.4631	14.5933
6	VAVSFGSGLGCNT	13	634.8	1267.59	2	14.743	11.738	NaN	NaN	NaN	NaN	14.6118	NaN	12.712	NaN	NaN	NaN	14.2165	NaN	NaN	NaN	NaN	NaN	14.3051	NaN	NaN	NaN	13.774	NaN
7	NANTTCGNDWVCEH	14	839.814	1677.61	2	15.8195	11.4826	15.4777	NaN	11.3842	11.3733	13.6554	12.5568	12.7598	14.155	14.2121	NaN	13.6047	15.71	14.9	9.85103	11.251	11.6402	14.033	13.3001	15.1526	15.2011	13.4218	13.6911
8	LDLALEKD	8	458.752	915.491	2	12.7157	9.24095	12.0055	12.592	10.8219	10.5958	12.3545	12.9305	10.2842	13.6136	12.6667	13.2706	10.952	NaN	NaN	10.2174	NaN	NaN	10.1225	10.0194	8.80834	13.0052	12.6131	13.0869
9	SSGVNYPEL	9	483.232	964.45	2	12.6569	10.3927	12.846	11.6783	10.3966	9.81357	12.2788	12.3213	11.4376	12.977	12.5973	12.8356	13.2997	11.4673	12.1135	9.93985	9.99017	10.3057	12.9066	12.4974	13.294	12.6809	11.9856	12.54
10	TEAPADKDELDQ	12	666.301	1330.59	2	NaN	NaN	15.1404	NaN	14.6003	14.8355	14.748	16.0681	13.7975	17.3852	15.6152	15.6084	NaN	NaN	NaN	NaN	NaN	NaN	15.4766	NaN	15.9338	15.6986	NaN	16.5042
11	VVGGENAVPHSWPW	14	767.875	1533.74	2	13.161	8.4561	11.7104	12.6307	11.1642	11.3046	12.5733	12.3558	10.5946	13.527	12.6342	12.5898	12.3308	13.302	13.0129	11.1842	NaN	13.0871	11.8798	11.8401	11.9396	12.6722	12.5315	12.3945
12	HVGDLGNVTAGK	12	584.309	1166.6	2	15.8127	12.3003	15.7824	13.2821	15.0077	14.971	14.4228	16.4983	10.9247	15.8848	NaN	NaN	15.583	11.5597	14.0811	14.3829	15.3343	16.0685	NaN	15.6358	NaN	12.7816	16.711	16.5079
13	ADGLYSDPK	9	483.232	964.45	2	15.5324	12.0207	15.356	15.1823	13.5684	13.4882	15.4707	14.3795	13.9084	15.5283	15.5698	15.0491	14.9182	16.1153	15.1671	12.9168	13.7608	14.5295	14.737	14.5848	14.7828	15.3882	14.8577	14.1637
14	EELYDFMDLL	10	652.291	1302.57	2	NaN	NaN	NaN	9.27892	NaN	7.71275	8.1733	9.49364	NaN	8.60076	8.7505	NaN	NaN	NaN	NaN	NaN	NaN	NaN	8.47545	NaN	NaN	9.14022	8.60336	9.26351
15	TTGHSYEK	8	461.717	921.419	2	13.0604	9.0775	12.7259	10.7907	9.21013	9.16686	10.7495	10.8122	9.52637	12.8478	9.79938	9.10494	9.72177	10.1629	9.0841	10.016	10.6807	11.4409	10.2204	11.4864	11.0971	11.0689	10.9094	10.8884
16	SAWNFNDGKC	10	600.242	1198.47	2	11.8208	8.45701	NaN	13.6065	8.26936	NaN	13.2303	11.0647	11.6592	14.0878	9.50159	15.3659	NaN	NaN	NaN	9.76053	NaN	10.9332	13.0301	9.93135	11.5723	13.9912	10.8486	10.7478
17	TACAHWSGNCC	11	662.237	1322.46	2	13.3008	10.1807	12.9098	13.315	NaN	NaN	13.6285	11.5829	11.3201	13.6211	12.0888	11.813	12.4497	13.7627	13.6564	11.5357	12.5095	13.0806	13.2796	12.9873	13.3499	13.5334	12.7167	11.0033
18	TACAHWSGN	9	502.207	1002.4	2	8.75161	NaN	8.80144	9.50884	7.9552	8.41842	8.8189	8.40788	6.79777	8.83383	NaN	8.13751	8.88468	9.18464	9.28308	7.61297	8.21258	8.98386	8.35949	8.24661	8.64471	8.70716	8.67294	7.67011
19	KTEAPADKDELDQ	13	730.348	1458.68	2	NaN	NaN	NaN	NaN	NaN	NaN	11.6326	NaN	NaN	NaN	NaN	15.0477	11.3904	12.8488	11.9656	NaN	NaN	NaN	NaN	11.1422	14.339	12.8575	NaN	NaN
20	GPTLTELLEGLK	12	635.866	1269.72	2	9.6039	NaN	8.28756	11.2161	11.4142	12.1227	10.16	13.013	NaN	10.8244	NaN	NaN	12.6029	NaN	9.76762	9.00943	8.27798	9.32101	NaN	7.688	NaN	9.46125	12.1313	13.1919
21	EELYDFM	7	481.693	961.374	2	8.49224	NaN	8.52765	9.09842	7.91504	6.99446	8.36075	8.38371	8.09051	8.85004	8.86862	8.64007	7.38614	NaN	6.93162	7.16451	7.72389	8.80805	8.99571	8.64478	7.27409	8.51662	8.36342	9.20009
22	VYVSSDGTAQF	11	587.275	1172.53	2	9.85907	NaN	NaN	10.3122	11.7454	12.0713	NaN	13.3551	NaN	11.7776	NaN	NaN	9.14215	NaN	NaN	NaN	NaN	NaN	NaN	NaN	NaN	NaN	9.67229	11.6541
23	TLEELYDFM	9	588.76	1175.51	2	NaN	NaN	10.4007	11.347	NaN	NaN	11.4906	12.1247	10.1276	11.5864	12.2555	10.1544	9.23067	8.48112	NaN	10.913	11.1723	12.108	NaN	9.08013	NaN	12.9633	10.4406	NaN
24	LYTNGPLPDK	10	559.297	1116.58	2	13.597	9.7196	13.0488	13.6658	12.3382	12.2545	12.6926	13.6827	11.1136	14.057	13.0348	13.0822	13.1685	10.7072	11.0601	10.9805	11.9487	12.4849	11.6079	11.5906	10.5258	13.261	NaN	14.1052
25	LNLALEKDYV	10	589.819	1177.62	2	NaN	7.69783	NaN	NaN	NaN	NaN	11.133	NaN	NaN	13.4292	NaN	11.6116	NaN	NaN	NaN	11.4774	NaN	NaN	NaN	NaN	NaN	NaN	NaN	NaN
26	YMEEALMKPL	10	612.803	1223.59	2	12.2014	NaN	12.4362	11.466	10.5158	NaN	NaN	NaN	9.74424	NaN	11.4166	NaN	10.4358	NaN	NaN	NaN	NaN	11.8755	11.1168	11.6481	NaN	11.0089	12.0665	11.9552
27	LGEYDR	6	376.683	751.35	2	10.378	6.57529	10.2035	9.60689	9.16523	9.20855	9.45104	10.1938	7.35065	10.8053	NaN	NaN	9.47521	NaN	NaN	6.46025	6.69353	7.93622	NaN	8.60998	NaN	9.60573	10.1999	11.1872
28	LDLALEK	7	401.239	800.464	2	11.161	NaN	NaN	11.9995	11.0067	10.8067	11.0503	12.4993	9.01719	13.1998	11.776	NaN	10.7635	8.17289	7.83266	11.1016	11.0467	12.2097	9.65522	9.81592	8.54711	11.4632	12.7069	13.1582
29	GLTCEGDKS	9	483.714	965.412	2	12.3818	9.43751	12.4893	13.6918	12.1551	12.4577	13.7635	12.0651	12.0738	12.7378	13.0397	12.9384	12.1622	12.1831	11.9899	12.0153	13.1502	13.6777	13.6848	12.1258	13.2075	13.2987	13.0766	12.7152
30	EELYDFMDL	9	595.749	1189.48	2	NaN	NaN	NaN	9.78443	7.36359	8.15065	8.61211	9.21558	NaN	8.56764	8.71407	8.19601	NaN	NaN	NaN	NaN	NaN	NaN	7.88705	NaN	NaN	9.59728	8.74926	9.87394
31	VDNNENEHQLS	11	650.276	1298.54	2	13.3158	9.8251	13.3548	12.6947	11.0802	11.3567	12.6589	12.4664	NaN	12.7153	11.6894	11.7188	12.5516	NaN	10.7203	8.4213	NaN	9.87602	11.3331	12.4378	11.5695	12.5518	12.2255	12.6665
32	STENAQLAENCDK	13	740.815	1479.61	2	NaN	10.1441	13.2219	13.815	12.3147	12.5761	13.8919	13.6303	NaN	NaN	13.7394	NaN	NaN	NaN	13.4121	11.8105	12.7364	NaN	NaN	13.7011	13.7799	14.089	13.9295	NaN
33	FLVDNPYTNS	10	585.276	1168.54	2	14.0043	11.501	13.8392	15.7719	13.2329	12.8079	15.5832	14.786	14.4406	14.731	15.2731	15.1652	13.8721	13.5222	14.054	12.3824	12.8978	13.4937	15.4731	13.6958	14.6583	15.5009	14.9211	14.6823
34	FPNSEVEVK	9	524.769	1047.52	2	17.3571	13.4891	16.8826	13.1437	17.3102	17.206	14.4376	18.5433	11.2564	18.0727	NaN	NaN	17.6044	NaN	13.3001	17.0605	17.5575	18.5544	NaN	16.0108	NaN	13.4478	18.5934	19.061
35	VGNSCTGLKV	10	517.769	1033.52	2	13.9022	10.52	13.0043	12.707	10.8929	10.849	12.9409	13.6929	NaN	14.0173	12.0613	12.9316	14.1898	NaN	9.66206	NaN	NaN	NaN	11.6733	11.3326	10.7783	11.9864	NaN	11.8231
36	TPEAELH	7	398.695	795.376	2	7.98082	NaN	8.17682	9.00277	7.85085	6.27905	9.43873	9.52142	8.50305	10.9017	10.3235	10.1982	NaN	NaN	NaN	8.33058	8.39678	9.43475	10.1782	7.73638	8.1206	9.29395	NaN	9.27122
37	VSAYLNWLDQK	11	669.34	1336.67	2	NaN	NaN	NaN	NaN	NaN	10.4792	NaN	NaN	NaN	10.0979	NaN	NaN	NaN	NaN	NaN	9.10155	9.25755	NaN	NaN	NaN	NaN	NaN	NaN	10.992
38	GLTCEGDK	8	440.198	878.38	2	16.1991	13.4672	16.1315	16.914	15.3373	15.344	16.553	15.8509	15.0437	16.7861	16.5931	16.4744	15.9831	15.7345	15.8532	15.0877	15.5584	16.2465	16.8018	16.1912	16.511	16.3881	16.2424	15.7535
39	VLGEYDR	7	426.217	850.418	2	11.9657	8.156	11.7208	11.3808	10.9013	11.0735	11.2185	11.7967	9.29432	12.4332	NaN	NaN	11.5584	NaN	NaN	8.08358	8.18124	9.4271	NaN	10.2341	NaN	11.5018	11.9902	12.9756
40	GLLDLALEKD	10	543.805	1085.6	2	NaN	NaN	NaN	12.0568	NaN	NaN	11.2962	NaN	NaN	NaN	10.5826	NaN	NaN	NaN	NaN	NaN	NaN	NaN	NaN	NaN	NaN	11.7363	10.625	11.0286
41	SNCCQHDTL	9	567.719	1133.42	2	11.6333	8.80564	12.0601	11.3574	9.45426	8.96679	11.5685	10.5756	10.6446	12.3061	12.6442	12.3864	10.8671	10.5881	10.5593	9.62402	10.7501	11.0809	13.1084	11.6622	12.3004	11.9684	11.6225	10.6746
42	DGECLNDR	8	489.7	977.387	2	10.9417	7.73988	NaN	NaN	NaN	9.49192	NaN	NaN	9.16133	10.8036	8.03425	NaN	10.6817	10.7316	NaN	NaN	7.14302	10.2866	NaN	NaN	NaN	10.5139	10.8309	NaN
43	VTESMLCAGYLPGGK	15	791.883	1581.75	2	12.3181	7.67723	10.056	11.805	10.2638	10.961	11.0244	11.2625	8.29086	12.4968	NaN	NaN	12.1813	11.4382	11.8539	8.61305	9.34826	10.1165	NaN	10.1034	8.78154	11.3391	11.7184	11.7229
44	CCETH	5	353.618	705.221	2	7.01239	NaN	7.43829	6.96353	5.19914	NaN	7.68156	NaN	5.62236	6.77113	7.0428	7.09642	NaN	NaN	NaN	NaN	NaN	5.87517	7.53086	NaN	NaN	6.81515	NaN	NaN
45	SGHCLPK	7	399.701	797.385	2	9.45534	NaN	9.2005	9.25773	6.84609	6.87219	9.31665	8.43057	7.37688	9.19515	8.88052	8.73104	8.43654	9.69451	8.85228	6.31328	7.47592	8.28101	9.01851	8.81712	9.62074	9.37389	8.6791	7.79928
46	VDYQHCS	7	454.683	907.349	2	10.6591	6.91065	9.084	NaN	8.88978	8.24479	10.8611	9.7636	9.30521	11.3542	NaN	10.1659	10.1454	9.60285	10.1384	8.63287	8.95818	10.193	8.09025	9.3326	8.76324	10.933	NaN	10.802
47	EWLSHAFC	8	525.229	1048.44	2	12.3459	8.99321	11.502	11.7546	10.5249	9.63013	11.3728	11.9585	9.54742	12.8504	12.1963	11.8264	10.6311	10.873	10.6425	10.9449	11.49	12.5423	11.5619	11.5473	11.2114	11.2738	11.7801	11.4132
48	YYQCAGGR	8	487.712	973.408	2	12.615	8.51386	12.3405	9.50254	11.3826	11.3016	10.8447	11.8101	7.13137	NaN	NaN	NaN	12.5874	8.04434	10.9518	10.3566	10.986	11.9415	NaN	11.0655	NaN	9.07868	12.4238	NaN
49	EFLCDKDK	8	527.748	1053.48	2	9.97995	NaN	9.22942	10.1183	8.29361	8.18144	9.88417	10.1747	8.21347	11.1567	10.653	9.96734	9.69852	9.3925	9.57589	8.78251	9.51672	10.6213	10.5277	10.4172	10.4209	9.97285	NaN	9.34129
50	VVGGENAVPH	10	489.755	977.493	2	14.0425	10.9378	14.1523	12.7869	11.692	11.1704	13.1745	12.6867	12.5597	14.2259	13.9722	13.9734	12.2478	12.1064	12.0066	11.5839	12.2293	13.4958	14.2794	13.3013	13.8892	13.4145	13.0887	13.0695
51	FLCNCDR	7	492.705	983.395	2	13.8413	10.4921	13.4577	14.9458	13.4887	12.5757	14.7883	14.7864	13.3462	15.1707	13.4921	12.6673	13.5781	13.2179	13.1951	12.0044	12.4923	13.4362	13.0548	12.8852	12.9887	15.025	14.7966	14.5481
52	AFTHSEN	7	403.177	804.34	2	12.3448	8.9181	12.2247	10.7281	9.10181	8.55909	11.0981	10.6942	9.41458	11.4995	11.6595	11.4846	9.46758	10.5797	9.05191	10.0439	10.9252	11.6284	11.2644	10.9496	10.5186	11.4674	11.481	11.1489
53	TCRPEEQC	8	540.709	1079.4	2	6.2218	NaN	6.45788	7.88427	NaN	NaN	8.07814	6.65019	6.74364	8.98227	NaN	8.02004	NaN	6.49916	NaN	6.6768	7.49851	8.16932	9.27831	7.56278	8.25924	8.60215	8.021	NaN
54	FLVDNPYTES	10	592.776	1183.54	2	15.634	13.138	15.4446	16.4428	14.5055	13.9125	16.3031	16.1578	15.2703	16.0902	16.216	15.8924	15.575	15.5237	15.3689	13.9139	14.3303	14.9547	16.8489	15.2365	16.2486	16.2331	15.9876	15.9862
55	LLPTAQETWL	10	586.319	1170.63	2	12.7669	9.87602	13.197	8.91702	NaN	NaN	NaN	NaN	NaN	9.69416	NaN	NaN	NaN	NaN	NaN	11.804	12.3621	13.0406	NaN	9.10646	8.2809	NaN	NaN	NaN
56	QSTDPCDETYCGSAAESEK	19	1067.91	2133.81	2	NaN	8.97529	13.5432	11.3485	10.1801	NaN	11.2718	NaN	NaN	NaN	11.8316	11.2881	NaN	NaN	NaN	NaN	10.8652	11.0546	NaN	NaN	13.2352	12.0952	11.8924	12.0965
57	STDPCNETYCGSAAESEK	18	1003.88	2005.75	2	13.0825	NaN	13.4711	10.9473	10.1491	10.4798	10.9057	11.8664	10.2193	12.6705	11.7849	11.1906	NaN	12.9912	12.5884	9.47911	10.7686	11.0093	12.2707	NaN	12.6359	12.04	12.0151	12.1918
58	YGFLLPASQ	9	498.263	994.512	2	12.8848	9.91107	12.9848	9.76453	8.54276	8.58104	9.52684	9.55369	NaN	11.0891	10.1685	10.9378	8.27801	9.81778	8.09618	11.5923	12.1927	12.8148	9.7641	9.81205	9.22961	8.82769	9.70091	9.55463
59	NSMVCAGGDGV	11	533.718	1065.42	2	15.7869	12.229	15.3424	13.906	12.7931	12.115	13.8771	14.088	11.3082	16.2897	15.408	15.0731	13.0113	13.167	12.0617	13.5873	14.3404	14.9229	13.3993	14.1359	12.644	13.2765	13.315	14.471
60	CGLGGSGTPVDELDR	15	766.854	1531.69	2	13.6178	10.6141	13.6437	14.6281	13.7727	13.7411	14.9841	14.5857	12.8109	14.5887	10.1512	NaN	14.3961	13.4458	13.4709	11.9929	12.6065	13.4641	9.93734	13.3425	NaN	14.3346	14.6981	14.5816
61	VSVTLSGK	8	395.737	789.46	2	11.9178	8.88492	10.3843	11.6693	11.7467	11.5692	10.5145	12.4122	8.48284	12.1731	8.18804	NaN	12.2264	8.80112	10.5805	11.9054	12.4813	13.2127	9.69708	12.4834	9.89145	10.9548	12.8755	13.0089
62	LDLALEKDY	9	540.284	1078.55	2	NaN	NaN	NaN	9.47203	NaN	NaN	8.80149	9.68424	7.25086	8.93107	9.36571	8.73028	NaN	NaN	NaN	NaN	NaN	NaN	NaN	NaN	NaN	NaN	NaN	NaN
63	YMQEALMKPL	10	612.803	1223.59	2	NaN	8.94428	NaN	NaN	NaN	9.59865	10.9487	11.9257	NaN	12.0233	NaN	10.8681	NaN	NaN	NaN	10.3795	10.9273	NaN	11.1168	NaN	9.82555	11.0089	NaN	NaN
64	ALHLEK	6	355.714	709.412	2	8.98803	NaN	8.4774	6.2696	NaN	6.46374	NaN	7.90275	NaN	9.25965	7.51937	6.69068	7.50403	7.53617	6.48464	NaN	6.44412	7.36995	NaN	7.89886	NaN	6.7512	8.12006	8.14274
65	CPCER	5	361.142	720.268	2	14.5344	11.3918	14.5031	15.0395	13.8872	13.9853	14.9961	14.1659	12.9756	15.0294	12.3048	11.5465	14.5986	13.7196	14.1373	13.3955	13.9458	14.2023	12.7057	14.4086	13.6106	14.4396	14.4322	13.9495
66	SAQLGDK	7	359.691	717.366	2	11.935	7.93393	11.255	NaN	10.7017	10.5301	11.4931	11.8677	9.25177	12.0873	11.8394	11.7852	11.9062	9.52366	8.52488	9.23582	10.2649	10.8315	10.3083	9.22472	8.50622	11.4496	11.0619	12.2829
67	CAGGDLR	7	374.674	747.333	2	NaN	NaN	NaN	8.38385	8.39011	7.3016	8.62959	9.85057	NaN	10.1992	NaN	NaN	7.81533	NaN	NaN	NaN	NaN	NaN	NaN	NaN	NaN	NaN	NaN	10.3638
68	VGSSCTGLK	9	454.728	907.443	2	14.6341	11.0177	13.9503	14.2435	12.7546	12.7903	13.4377	14.4665	11.7698	14.6767	12.4197	12.3323	15.0658	11.8384	12.8962	10.5768	10.9754	11.6782	11.1326	12.1665	11.8067	14.0975	13.5833	14.359
69	LESTPQCNL	9	531.25	1060.49	2	16.0175	13.3703	15.7417	16.8994	15.6084	15.4024	17.0284	16.5689	15.4702	16.3036	15.6195	15.2326	15.3465	NaN	15.4264	15.2024	15.9014	16.3444	16.6239	16.1824	16.7198	16.7241	16.517	15.9248
70	LLPVVDYQ	8	473.766	945.517	2	11.049	8.29498	11.0197	NaN	NaN	8.16312	10.9464	10.1381	9.91	NaN	11.4213	NaN	NaN	NaN	NaN	8.84716	9.69071	10.1132	11.4776	10.4165	11.9409	11.2915	10.5038	NaN
71	QTGLPGGTYCDVLSGDK	17	884.413	1766.81	2	18.0856	NaN	17.8285	16.6588	15.1274	15.1721	16.1351	16.6254	NaN	17.1201	16.6657	17.0109	17.3906	16.8634	16.8275	13.0061	13.6849	14.6643	NaN	NaN	16.2108	NaN	NaN	NaN
72	AAHCVDR	7	414.693	827.371	2	9.07805	NaN	8.6754	NaN	NaN	NaN	NaN	8.18282	NaN	8.99758	NaN	NaN	NaN	NaN	NaN	6.83669	6.993	8.00506	NaN	7.67505	NaN	NaN	NaN	8.32636
73	VYVSSDGTA	9	449.712	897.408	2	11.4904	7.66353	10.5792	12.557	10.0859	9.67664	11.9	11.4581	9.45043	12.0515	11.6941	11.4615	12.7001	7.81858	7.61795	NaN	8.08241	8.12689	9.11153	8.0335	NaN	11.7316	10.8179	11.169
74	DLALEKD	7	402.211	802.407	2	13.2251	9.84943	12.7933	13.4696	11.1473	11.0961	13.248	13.2056	11.5722	13.4663	13.058	13.548	NaN	NaN	NaN	9.55464	9.62198	10.1971	11.7584	10.8102	NaN	13.9341	12.879	12.897
75	ADKDYH	6	374.667	747.319	2	10.9841	7.03358	10.6516	10.795	8.39252	NaN	9.07255	9.62173	NaN	11.0098	10.4542	10.285	NaN	NaN	7.86549	NaN	NaN	7.71963	NaN	NaN	6.61504	10.6129	NaN	9.6281
76	CGSAAESEKET	11	584.744	1167.47	2	8.53084	NaN	9.72493	7.6021	NaN	NaN	7.29679	NaN	NaN	8.96683	9.58411	9.24789	NaN	NaN	NaN	7.71108	8.66252	9.08599	10.5372	8.23978	9.65125	7.77186	NaN	NaN
77	VGNSCTGLK	9	468.235	934.454	2	17.4524	13.813	16.8486	17.0483	15.5356	15.5859	16.3529	17.2214	14.6416	17.6711	15.3935	15.3141	17.7039	15.0971	15.927	13.3984	13.8416	14.5384	14.1386	15.0375	14.8794	17.0336	16.4911	17.1352
78	DFVACNH	7	431.68	861.344	2	7.75782	NaN	NaN	8.14122	6.72765	NaN	7.08539	8.13646	NaN	7.74678	NaN	NaN	10.3392	NaN	NaN	NaN	NaN	NaN	6.97512	6.76858	NaN	6.04496	NaN	7.77523
79	SECCCDGGR	9	550.682	1099.35	2	10.2428	NaN	10.0991	9.68358	9.0254	8.8409	10.2281	9.83855	8.08423	10.284	NaN	NaN	9.9739	9.53113	9.8426	NaN	8.33999	8.74351	NaN	9.78774	7.26279	9.4854	9.77382	9.19533
80	QASGGTLNWTYNQGLK	16	869.922	1737.83	2	13.1982	8.94825	13.8045	11.7888	10.693	10.2721	11.7705	12.5468	10.297	12.8427	11.9041	NaN	10.1491	10.5239	NaN	11.4792	12.6285	13.4187	12.1242	11.7881	11.0757	12.4201	13.1661	13.0388
81	APYNKEH	7	429.71	857.403	2	7.50187	NaN	NaN	8.37387	NaN	NaN	8.89561	6.56358	6.64881	8.08148	10.7041	10.8383	NaN	8.6627	7.40924	NaN	NaN	6.79176	10.8404	7.38134	9.77836	8.09799	NaN	NaN
82	VGNSCTGLK	9	468.727	935.438	2	14.6022	10.937	14.0123	14.2693	12.6076	12.6875	13.5434	14.3522	11.7671	14.9108	13.0303	12.9855	14.9611	12.2702	13.2237	10.3597	10.8411	11.547	11.4764	12.0945	12.1708	14.3499	13.526	14.4797
83	LDFYVLPV	8	483.27	964.527	2	9.48746	NaN	NaN	9.74531	8.19841	8.74501	8.45647	9.95309	NaN	11.0426	10.2398	10.1813	8.9587	9.21772	7.84875	8.68764	8.83903	9.95457	8.14411	7.08664	7.40028	8.12844	8.98651	9.5563
84	VVGGENALPHSWPWQ	15	838.912	1675.81	2	10.8289	NaN	NaN	NaN	9.44488	9.69855	NaN	NaN	8.93398	10.2987	NaN	NaN	11.7112	10.2005	11.3065	8.59403	8.8183	10.2137	10.5397	10.6139	NaN	9.64778	9.90797	NaN
85	VVNYATCSK	9	521.748	1041.48	2	9.90261	NaN	8.99053	NaN	11.7669	11.7851	8.20796	12.5311	NaN	10.8922	NaN	NaN	12.1991	NaN	7.92651	9.4728	9.19341	10.9465	NaN	8.4452	NaN	8.80146	11.9034	12.7383
86	GVDSLFVHEK	10	565.795	1129.58	2	9.50126	NaN	8.27961	10.5466	8.31591	9.34747	10.7315	10.826	NaN	10.8748	NaN	NaN	10.139	NaN	NaN	8.28861	9.47817	10.2807	NaN	NaN	NaN	8.81124	9.63972	10.17
87	VDGQYAVHGVTS	12	616.8	1231.58	2	12.8961	9.68008	13.354	NaN	NaN	NaN	9.59414	11.3042	NaN	12.5611	10.21	9.23674	NaN	NaN	NaN	9.43688	10.0851	10.7974	NaN	11.5775	8.18509	NaN	NaN	11.7076
88	NAGDLFVHPR	10	375.865	1124.57	3	11.5983	7.16002	9.9199	10.1211	10.2791	9.73772	10.4912	11.0742	9.0011	11.3553	9.31863	NaN	10.1885	9.22544	10.262	9.13274	9.52332	10.6159	9.16838	9.85808	8.58653	11.0929	10.4736	11.0719
89	DYATYH	6	385.162	768.308	2	NaN	NaN	8.81049	7.7033	NaN	6.53191	8.34686	NaN	6.22973	9.23371	NaN	6.55214	NaN	NaN	NaN	NaN	8.26022	9.07862	NaN	7.58824	6.39486	8.5351	8.81731	NaN
90	SVEDCH	6	373.643	745.27	2	7.9968	NaN	7.19414	10.68	8.6716	8.53253	10.2496	9.14038	8.66313	8.38622	6.32127	NaN	7.76024	6.41409	7.54849	NaN	6.89867	NaN	NaN	7.64284	8.32525	9.38515	8.97194	7.35312
91	MVCAGFLENK	10	584.777	1167.54	2	13.4143	10.088	11.9365	13.8246	12.4026	12.6985	13.2483	13.5221	10.7992	14.029	10.1028	9.75537	15.4873	14.5146	14.9796	10.1656	10.0981	10.9739	8.80382	12.4226	11.0433	13.0312	12.7588	13.3914
92	LLPWDPK	7	434.749	867.485	2	11.9993	8.63869	11.2158	10.5214	9.21493	8.96944	10.0323	10.1257	8.00552	11.7854	11.6439	11.809	10.6402	10.9518	10.7325	9.5841	10.5274	11.0535	11.7251	11.0387	11.0085	10.7621	10.5439	11.4283
93	LLDF	4	507.28	506.274	1	NaN	NaN	11.5204	9.43844	NaN	NaN	8.90537	10.2228	NaN	10.7353	10.7415	10.2064	NaN	NaN	NaN	8.26406	9.48147	9.71018	10.7912	NaN	9.78293	NaN	9.9049	10.2898
94	DNTAGPHCEK	10	564.741	1127.47	2	9.23024	NaN	9.03159	8.84961	NaN	6.99818	9.21078	8.51717	7.46672	9.54181	8.64852	8.40062	8.63497	9.94634	9.17626	NaN	7.83151	8.47315	8.85255	9.1685	9.21855	9.08609	8.79519	8.10958
95	QVVLGEYDR	9	539.779	1077.55	2	12.1227	7.14134	NaN	12.2268	10.1286	10.8443	11.8594	11.4227	NaN	11.6581	NaN	NaN	14.2327	NaN	NaN	9.59946	10.3793	11.0489	NaN	NaN	NaN	11.0622	10.8107	11.9399
96	TEAPADK	7	366.183	730.35	2	10.3904	NaN	9.67144	8.31575	8.13183	7.84346	9.4228	10.0601	7.76766	10.425	9.97496	9.99695	8.18059	9.79823	8.24602	8.95933	9.44602	10.1746	9.90707	9.37395	9.01051	9.27825	9.27907	NaN
97	NGQCLNDR	8	489.21	976.403	2	NaN	NaN	10.2335	NaN	9.13679	NaN	NaN	10.0664	NaN	NaN	7.52205	NaN	9.97439	10.2498	10.078	8.18407	NaN	NaN	NaN	NaN	9.11702	NaN	10.1946	NaN
98	GLLNLALEK	9	486.291	970.57	2	10.1906	NaN	NaN	NaN	10.8129	11.4259	10.7187	11.9677	7.19627	NaN	9.99363	NaN	11.8465	NaN	NaN	8.76971	8.24392	NaN	NaN	8.11784	NaN	10.7017	11.8754	NaN
99	ALADF	5	536.27	535.264	1	16.3493	13.4454	16.3744	12.6447	10.9577	10.4487	13.3962	14.0263	12.8093	16.8224	17.0258	16.8169	13.0498	14.175	12.2525	14.0434	15.0412	15.7097	16.9661	15.6083	15.4624	14.2631	14.4341	14.3606
100	FNEVSQK	7	426.217	850.418	2	10.359	6.59173	10.0515	NaN	10.9562	10.8878	7.63685	11.9347	NaN	10.0572	NaN	NaN	11.3216	NaN	7.82988	9.66159	10.0475	11.0484	NaN	9.44786	NaN	NaN	11.9211	11.6927
101	MEHTLNHP	8	489.727	977.439	2	12.1651	8.22013	11.0318	11.5496	10.0688	NaN	12.2409	12.0286	10.0935	13.1567	14.0256	13.6657	10.0471	12.4411	9.94423	10.847	12.0033	13.0401	12.0102	10.6448	10.6806	13.1735	12.7937	12.8734
102	VVGGTEAQ	8	380.696	759.376	2	9.69921	NaN	8.82428	NaN	7.68349	7.55893	7.08131	9.2987	7.09978	9.28334	8.10008	7.20682	8.43028	NaN	7.45088	9.76066	9.60889	11.0821	8.75661	9.93596	8.69708	7.83423	8.58428	8.8483
103	QAPADKDELDQ	11	615.778	1229.54	2	10.9721	NaN	NaN	11.5658	9.88177	NaN	11.4815	10.1492	10.4978	11.4936	11.7874	12.8116	8.83764	10.5623	10.0092	8.76932	NaN	10.5654	12.0074	10.3863	12.2738	12.0944	11.2035	11.8278
104	LACGVLGLTQ	10	516.28	1030.55	2	14.7032	11.7317	14.6084	15.1632	13.5169	13.5131	15.0952	14.1107	13.0698	14.3063	13.6935	13.691	14.1281	14.1264	13.8533	12.4653	13.1768	13.6196	14.6786	14.3775	14.9697	14.7552	14.6112	14.1379
105	CAGYLPNK	8	461.727	921.438	2	13.4281	NaN	13.993	11.797	11.0377	NaN	12.0559	12.2997	10.6245	12.9292	10.0259	NaN	NaN	9.72812	NaN	NaN	NaN	NaN	10.5314	12.5714	11.271	12.308	12.6374	12.1622
106	SLVDFVNDHGNLK	13	486.584	1456.73	3	17.6123	13.7921	17.383	15.8435	15.5174	15.2526	16.2793	16.7577	NaN	17.4984	14.1254	NaN	15.2628	15.5818	14.5461	16.9097	17.4886	18.2466	13.5482	16.1349	13.6403	16.4342	NaN	17.4363
107	FLVDNPYTESY	11	674.308	1346.6	2	12.8095	9.40576	NaN	NaN	13.4125	12.5655	NaN	14.2492	10.4433	NaN	NaN	9.19399	NaN	NaN	10.3857	11.6824	11.3363	12.781	NaN	11.7779	NaN	12.025	NaN	12.9251
108	EAVLT	5	532.297	531.29	1	NaN	NaN	15.5956	14.8614	NaN	12.271	14.442	NaN	NaN	NaN	NaN	NaN	NaN	NaN	NaN	NaN	NaN	NaN	NaN	15.5473	NaN	NaN	NaN	NaN
109	TLMEHTLNHP	10	596.793	1191.57	2	13.8802	9.78608	11.2788	12.3557	11.1879	10.6772	13.1189	13.0129	10.6254	14.1455	14.0949	13.8053	10.2181	12.601	10.8531	12.7538	13.9107	14.8395	12.8691	12.8397	12.3922	13.838	13.9819	13.6008
110	SMLADYLNK	9	535.763	1069.51	2	9.54261	NaN	NaN	10.5802	14.1052	15.1163	9.4644	15.29	NaN	11.9662	NaN	NaN	13.4988	NaN	NaN	12.1334	11.9622	13.6257	NaN	9.97423	NaN	11.0765	15.0632	15.8311
111	FVGTGGEK	8	397.706	793.397	2	15.8997	13.0317	15.9112	16.2298	14.7612	14.4617	16.4676	16.1071	14.8255	16.0796	15.3231	14.7819	15.367	15.4381	15.4586	14.6381	15.4586	16.1087	15.8025	15.9173	15.9208	16.3276	16.225	16.0813
112	DLNECNQAPK	10	594.77	1187.52	2	NaN	NaN	NaN	NaN	NaN	NaN	8.74693	8.25993	7.67846	NaN	7.78956	NaN	NaN	7.56313	NaN	NaN	NaN	NaN	NaN	NaN	NaN	NaN	NaN	8.51005
113	SAWNFDDGK	9	520.72	1039.42	2	12.3551	8.93711	11.7964	13.0311	11.5878	11.4847	12.4838	13.4949	10.7699	13.287	11.6446	11.5212	11.6784	NaN	8.52075	9.90896	9.78353	10.9618	9.61869	9.99339	8.88326	13.1418	12.8805	13.6551
114	SSGVNYPELL	10	539.774	1077.53	2	11.6857	8.62436	10.6549	13.2602	11.6655	11.5834	12.6688	12.2685	9.67533	11.9861	10.0098	10.1479	13.121	10.6442	12.3713	8.64197	NaN	NaN	9.77357	11.539	12.2606	11.7689	10.4164	10.941
115	QGPSGPSGER	10	486.232	970.447	2	10.7755	7.30998	10.6709	10.6623	9.27001	8.65678	10.4521	10.4982	8.29622	13.0614	10.6878	9.80678	10.888	8.93347	10.187	9.5549	9.78001	11.034	9.4064	8.28083	9.23827	10.1576	9.81395	10.2142
116	AHCVDR	6	379.174	756.334	2	13.9194	8.2151	13.3807	11.9493	11.5386	11.2214	11.9512	13.0324	8.67965	14.52	11.9281	10.0853	12.062	11.1868	10.2225	11.2516	12.4687	12.9551	9.3596	12.3527	9.28699	11.2916	11.5595	13.4705
117	TPFDPK	6	352.685	703.354	2	9.8195	6.5796	9.56656	9.83068	9.34136	8.99615	9.88622	10.5867	7.47839	10.4107	9.44566	8.76938	8.94295	NaN	7.25892	9.02879	9.95524	10.633	9.37283	9.57825	8.24275	9.27744	10.4665	10.5979
118	VGNSCTGLKV	10	518.261	1034.51	2	11.501	NaN	8.54442	10.2891	NaN	NaN	10.5236	NaN	NaN	11.1543	NaN	10.5719	11.8664	NaN	NaN	NaN	NaN	NaN	NaN	8.18839	NaN	9.53457	8.18302	NaN
119	NAALCFS	7	391.679	781.343	2	11.2025	8.69543	9.85767	12.3492	10.7076	9.88429	11.8539	11.2393	9.73285	11.469	9.80314	10.4974	11.4538	11.2943	16.3244	10.0003	14.7262	10.9578	10.1075	9.69732	10.3846	10.6022	10.8035	10.5076
120	EFLCDK	6	406.186	810.358	2	8.4692	NaN	NaN	7.91277	NaN	NaN	7.55033	NaN	NaN	8.07204	8.78852	8.0342	7.86508	NaN	7.4943	7.42208	7.99151	8.51857	8.27044	7.61605	7.97389	7.43292	6.73499	6.69237
121	LLTLMEHTL	9	535.799	1069.58	2	9.40114	NaN	7.72523	8.64169	7.93308	7.17127	9.40146	9.29949	NaN	8.99151	8.27871	NaN	NaN	NaN	NaN	7.90905	8.54501	NaN	NaN	NaN	NaN	8.35554	9.12971	9.0243
122	DLLVAEHPQ	9	511.269	1020.52	2	12.7234	9.08188	12.3615	NaN	10.1973	NaN	12.0442	12.254	10.5253	13.5778	13.5251	13.8323	NaN	NaN	10.9499	10.4864	11.3065	NaN	12.3395	NaN	11.4823	NaN	NaN	NaN
123	DGFFGNPLAPNPADK	15	780.376	1558.74	2	12.2759	NaN	12.3945	NaN	11.1753	11.2126	12.1446	12.2318	10.5435	NaN	11.4707	11.0818	11.6192	11.2904	11.0907	10.7273	11.4142	12.0734	11.6981	11.8285	11.5053	12.4966	12.6574	12.6439
124	LDWLDQK	7	459.239	916.465	2	10.0511	NaN	NaN	NaN	8.66024	8.20456	9.204	9.72703	NaN	10.435	NaN	NaN	NaN	NaN	NaN	8.95151	9.68252	10.4191	NaN	NaN	NaN	NaN	9.43249	9.3744
125	VVLGEYDR	8	475.751	949.487	2	12.1527	8.30933	11.7264	10.4569	10.6688	10.6143	10.7156	11.8836	8.33311	12.4887	NaN	NaN	12.6358	NaN	NaN	10.2365	11.0251	11.6887	NaN	10.3406	NaN	10.5759	11.5274	12.6322
126	LSLPQDYPCYV	11	677.82	1353.63	2	11.9344	7.59231	12.0462	NaN	NaN	9.8586	11.6824	11.1264	10.7676	11.9364	12.51	13.0845	11.4026	12.2542	11.6005	NaN	NaN	10.9115	12.4427	10.7633	12.4375	12.1027	11.5771	11.6384
127	GLPGGTYCDVLSGDK	15	769.86	1537.71	2	16.7143	12.7729	16.4421	16.6397	15.1129	15.2326	16.2551	15.9332	14.9361	16.3008	16.1235	16.7972	15.5394	15.1191	NaN	12.5589	13.5487	14.5053	15.6744	15.1633	15.7896	16.9196	16.2251	16.7092
128	TYNQGLK	7	412.219	822.424	2	10.9276	8.01485	10.9463	12.6415	10.905	10.3506	10.784	11.6821	10.2982	12.4211	12.3425	11.4355	10.5956	13.17	10.4208	11.3212	12.5831	13.0115	11.6735	11.6818	11.0624	12.4756	12.9096	12.7588
129	EWLSHAF	7	445.213	888.413	2	9.92646	NaN	NaN	9.94567	9.07529	8.29677	9.1982	9.85595	NaN	10.1202	8.29161	7.99126	7.63525	NaN	NaN	8.48538	8.64504	10.0507	8.86451	9.24007	8.57707	8.1798	8.93167	8.45293
130	NSGTPVDELDR	11	601.786	1201.56	2	15.7793	NaN	16.0998	13.2748	12.9779	NaN	NaN	14.0711	12.5547	13.9489	NaN	NaN	12.0149	10.3222	11.1508	11.5199	NaN	12.8677	10.0528	13.2837	11.2882	13.6892	14.32	13.7763
131	DNLSSLK	7	388.711	775.408	2	11.7156	8.95096	11.6697	8.92506	8.46111	8.34839	NaN	7.84592	NaN	11.6649	8.97738	NaN	NaN	8.23229	NaN	9.67992	10.2625	11.2015	9.20918	10.9295	9.25281	8.91863	9.5879	9.64714
132	LVDLVDELDKDTV	13	737.386	1472.76	2	NaN	NaN	NaN	NaN	NaN	NaN	NaN	NaN	NaN	NaN	8.46001	NaN	8.63243	NaN	NaN	NaN	NaN	NaN	7.99989	NaN	NaN	NaN	9.35922	9.8016
133	TSLV	4	419.249	418.243	1	13.5064	NaN	13.4209	15.1904	13.6423	NaN	14.5384	15.3692	NaN	15.1437	NaN	NaN	NaN	NaN	NaN	12.0207	12.3997	NaN	NaN	NaN	NaN	15.1859	15.2661	15.414
134	AAPCGPHEATC	11	585.737	1169.46	2	9.86278	NaN	NaN	9.47362	7.92346	7.85901	9.9672	NaN	8.2655	9.20445	NaN	NaN	9.19029	9.00674	9.03485	NaN	8.18082	8.91501	NaN	9.43529	8.95108	9.4714	9.05316	8.46416
135	GYESHMTEF	9	550.721	1099.43	2	14.6502	11.6155	14.6201	12.2044	11.3646	10.3324	12.5286	13.384	11.5441	14.7563	14.3963	14.059	11.8482	NaN	10.0362	12.1687	12.8637	13.6402	14.8531	14.0639	14.0186	12.8723	13.5031	13.1278
136	NNLSSLK	7	388.219	774.424	2	14.6522	11.7591	14.5403	12.1808	11.4191	11.109	11.8777	12.9975	10.6462	14.6056	12.2351	11.3402	11.6841	11.3689	10.3371	12.6213	13.3483	14.2136	12.4476	13.8995	12.5064	12.1921	12.7358	12.6465
137	YVTNYVLGHL	10	589.812	1177.61	2	9.99825	NaN	NaN	11.6008	8.46136	8.95049	10.7794	10.0041	8.35741	10.8825	12.3819	11.9724	9.99333	10.0702	9.71674	8.50587	8.59278	9.62124	12.0088	9.75291	11.5298	10.7461	9.42171	9.35116
138	ASYDEFQEEENK	12	744.81	1487.61	2	9.91656	NaN	10.5021	NaN	NaN	NaN	NaN	NaN	NaN	NaN	NaN	NaN	NaN	8.71918	9.24359	NaN	NaN	NaN	NaN	NaN	NaN	NaN	NaN	NaN
139	LDLALEKDYV	10	589.819	1177.62	2	11.2327	NaN	10.8814	11.56	9.79913	9.2675	11.133	12.1054	NaN	NaN	12.5323	11.6116	10.2723	NaN	NaN	11.4774	11.4355	12.5594	10.475	9.8672	NaN	11.2907	12.2025	12.0821
140	ACQGGYHV	8	446.193	890.37	2	15.3375	12.3343	15.0287	15.7838	13.6138	13.2684	16.1323	15.1882	14.3349	15.4071	15.1492	14.8281	14.5081	14.7349	14.6784	13.9999	14.9403	15.4335	15.7097	15.3896	15.7187	15.9264	15.572	14.9511
141	ACNCDPR	7	447.167	892.317	2	7.49746	NaN	7.32096	7.51101	NaN	NaN	7.87352	6.68462	NaN	8.19699	8.15379	7.91364	7.05222	7.89726	7.1576	NaN	NaN	6.97175	8.23224	7.16152	7.87908	8.08143	7.49269	6.67718
142	LESTPQCN	8	474.709	947.402	2	11.7598	9.11934	11.8926	11.4415	9.79461	9.31516	12.3527	11.991	11.5571	12.7594	13.2402	12.9862	12.0237	11.7097	12.0805	10.7694	11.822	12.0053	13.1846	11.6348	12.2593	12.8445	12.7592	12.5012
143	VGNSCTGL	8	404.188	806.359	2	NaN	8.2938	10.4058	11.956	9.98685	9.34566	10.9288	10.325	10.0764	10.7374	12.5842	13.3803	11.0878	10.0532	9.43055	6.57854	7.06486	NaN	NaN	8.6958	NaN	11.5083	10.1107	10.5538
144	VDNNENEHQ	9	550.218	1098.42	2	10.1009	NaN	10.3805	10.0068	8.73986	8.87354	10.2668	9.85038	8.80089	10.6239	9.87873	10.2047	8.34872	NaN	NaN	NaN	NaN	7.47755	9.55134	9.24342	NaN	10.2588	9.57054	10.2702
145	LCNCDR	6	419.171	836.327	2	11.345	8.35733	11.2534	11.8291	10.9251	10.3958	11.1076	11.3235	9.92105	11.8939	9.6308	9.15717	10.9005	10.472	10.3229	9.52291	9.55169	10.6188	9.87584	10.5287	10.0273	11.3181	11.3542	11.2913
146	NPVLSDSSC	9	489.714	977.412	2	12.2935	9.94522	11.8936	11.4018	9.38056	9.00086	11.3988	10.0689	9.73583	11.4186	11.1502	11.2698	11.3569	11.5025	10.7869	NaN	10.2652	10.4326	11.6283	11.915	11.6112	11.5409	10.7009	10.8719
147	DGVFQH	6	351.664	701.313	2	8.98055	NaN	8.6079	8.78127	NaN	7.806	8.2162	NaN	NaN	9.26012	NaN	8.24913	NaN	NaN	NaN	6.44593	NaN	8.15233	NaN	NaN	NaN	8.35384	NaN	NaN
148	FTAL	4	451.254	450.248	1	NaN	NaN	NaN	8.41525	6.93365	NaN	8.51415	8.55377	NaN	10.1223	NaN	NaN	NaN	NaN	NaN	NaN	NaN	9.50908	NaN	NaN	NaN	9.98609	9.64262	9.94718
149	SSNPCSET	8	441.17	880.323	2	7.83452	NaN	7.99319	8.66275	NaN	NaN	8.57967	6.91692	NaN	NaN	9.9882	10.1927	NaN	6.84449	NaN	9.06819	9.59357	10.0082	8.67204	7.40545	7.89709	9.20804	8.22471	8.49025
150	SGSSWAH	7	366.16	730.304	2	8.48639	NaN	7.96584	6.30177	6.55162	6.2846	6.36592	7.68458	NaN	8.39872	NaN	NaN	6.34026	NaN	NaN	8.26806	8.46539	9.89039	NaN	8.79601	NaN	5.69974	7.53193	8.40548
151	SSAWNFNDGK	10	563.743	1125.47	2	NaN	NaN	NaN	9.65127	NaN	NaN	9.25897	NaN	NaN	9.95749	8.34066	NaN	NaN	NaN	NaN	NaN	NaN	NaN	NaN	NaN	NaN	9.72005	NaN	9.93904
152	STGGNNRAP	9	437.214	872.41	2	NaN	NaN	NaN	7.50027	NaN	NaN	NaN	NaN	NaN	NaN	7.88222	8.47868	NaN	NaN	NaN	NaN	NaN	NaN	7.1854	NaN	NaN	7.08488	NaN	7.59695
153	LVVHPY	6	364.21	726.406	2	15.8157	12.0954	15.7431	12.6571	12.8621	12.5325	12.7792	14.1588	11.9518	15.2393	13.6056	13.277	13.215	12.8	12.6115	13.3404	13.7825	14.9808	13.2627	14.6221	13.1698	13.4502	13.9179	14.6623
154	MVCAGFLEGGK	11	592.775	1183.54	2	NaN	NaN	NaN	10.8861	NaN	NaN	NaN	10.4066	NaN	10.598	NaN	NaN	11.254	NaN	11.6515	NaN	NaN	NaN	NaN	NaN	NaN	10.243	NaN	NaN
155	VLPLVTV	7	370.748	739.484	2	NaN	NaN	NaN	7.70113	NaN	NaN	NaN	NaN	NaN	7.60958	7.40347	8.2686	NaN	8.57584	8.23408	NaN	NaN	NaN	NaN	NaN	7.51409	7.15942	NaN	NaN
156	GLAEGDHGFHVHQ	13	468.553	1402.64	3	12.6796	9.75428	13.8144	11.6596	9.83893	8.91344	12.4248	12.0503	11.3375	11.7123	12.4925	12.098	10.5847	10.2165	9.59416	10.6665	11.7699	12.4295	14.127	13.1236	13.6211	12.7701	12.8873	12.2233
157	VFDENC	6	392.153	782.29	2	NaN	7.24827	10.1196	10.0568	NaN	NaN	10.429	7.51658	8.97816	14.2896	10.4064	9.68435	8.37116	NaN	9.05949	7.69475	8.45817	8.8411	9.63679	9.26667	9.55535	9.9529	NaN	NaN
158	YHKPSV	6	365.698	729.381	2	8.07466	NaN	8.1439	NaN	7.49699	7.12737	7.81627	9.44271	7.25086	NaN	NaN	NaN	9.90479	8.96964	10.0939	NaN	NaN	NaN	NaN	8.24228	8.61237	7.40916	NaN	8.73145
159	LQLGSSYEGRPL	12	660.35	1318.69	2	17.3673	13.8906	17.5604	16.5623	14.0502	13.5756	17.0802	16.4229	15.3732	18.0713	18.7628	18.1158	14.2744	15.9523	13.9618	15.9248	17.0112	17.4386	17.8595	16.1988	16.3925	17.8759	17.2713	17.2002
160	TDGPLPDK	8	421.717	841.418	2	9.4138	NaN	NaN	9.48513	NaN	NaN	9.05449	NaN	NaN	9.87504	NaN	NaN	9.63127	NaN	8.45937	NaN	NaN	NaN	9.11463	NaN	8.60864	9.83101	NaN	9.38624
161	CVDWK	5	354.163	706.311	2	8.98694	NaN	8.64948	NaN	8.55622	8.04646	7.18483	9.7564	NaN	9.55153	NaN	NaN	9.53762	NaN	NaN	8.12824	8.7252	9.11354	NaN	8.34196	NaN	NaN	9.73414	9.94876
162	QTMVCAGGDLR	11	612.279	1222.54	2	NaN	NaN	9.34477	11.0104	10.7725	11.0204	10.5128	12.585	7.72788	12.0172	NaN	NaN	8.95366	6.86001	NaN	9.73133	10.2349	11.2392	NaN	9.53073	NaN	10.2607	11.3658	12.5772
163	CGYCGLGGSGTPVDELDR	18	956.911	1911.81	2	12.2193	NaN	12.858	NaN	10.7379	10.7883	12.0629	12.0276	9.88649	12.4062	NaN	NaN	NaN	NaN	11.0077	NaN	NaN	NaN	NaN	10.6635	NaN	NaN	NaN	11.7503
164	LYTNGPLPDK	10	559.789	1117.57	2	14.99	11.1396	14.5932	15.0001	13.555	13.5872	14.2409	15.0683	12.4816	15.5841	14.7568	14.8975	NaN	11.9674	12.4128	NaN	NaN	13.734	13.0409	NaN	12.0046	14.8271	NaN	15.6277
165	GDAGPAGPK	9	385.196	768.377	2	8.07376	NaN	8.11957	8.16611	NaN	NaN	7.72199	8.06275	NaN	10.147	9.69678	9.66819	7.75304	NaN	6.82755	7.23713	7.51789	8.54975	8.62666	NaN	7.14043	7.22766	7.10113	7.76194
166	WEVTQAS	7	410.696	819.376	2	12.5467	NaN	12.429	11.9759	NaN	9.42366	12.3293	11.5116	11.0795	12.9933	13.6202	13.2862	9.97471	11.2186	9.30145	11.3562	12.1681	12.6148	13.0864	11.5215	12.0027	12.8957	12.5762	12.3473
167	YVSSDGTAQ	9	464.207	926.398	2	NaN	NaN	NaN	NaN	7.56787	NaN	NaN	NaN	NaN	NaN	7.21461	NaN	NaN	NaN	NaN	NaN	NaN	NaN	NaN	NaN	NaN	NaN	8.27463	10.8172
168	TVLVTGTLK	9	466.295	930.575	2	15.1185	12.1373	15.2269	15.3751	13.7407	13.8386	15.3773	15.32	12.9642	14.7085	12.972	11.5949	14.5088	14.3001	14.0251	13.2227	14.0818	14.4305	13.4017	14.8463	14.1055	14.8676	15.2989	15.416
169	KWSGEK	6	367.695	733.376	2	8.37233	NaN	7.59336	9.84642	8.48957	NaN	8.78685	10.6593	7.6536	8.7341	7.78033	NaN	NaN	8.3947	7.19713	NaN	NaN	NaN	7.1681	7.90523	6.92835	9.69275	10.1574	10.5633
170	VDNDENEH	8	486.19	970.363	2	NaN	NaN	NaN	8.03273	7.58201	7.64314	8.75006	8.22522	7.44834	10.6568	10.5276	10.4398	NaN	NaN	NaN	NaN	7.07275	7.40407	8.87923	NaN	NaN	9.67292	8.66792	9.93428
171	GGSGTPVDELDR	12	601.786	1201.56	2	NaN	12.8404	NaN	NaN	12.9779	12.2537	NaN	NaN	12.5547	NaN	NaN	NaN	NaN	NaN	NaN	11.5199	12.1752	12.8677	NaN	13.2837	NaN	NaN	NaN	NaN
172	CNCNR	5	362.629	723.243	2	9.43559	NaN	7.31779	9.17351	7.26947	6.87361	9.95862	7.32029	7.05956	9.2051	7.94741	8.18309	7.67941	6.80239	7.94362	7.36847	NaN	8.40849	7.31481	5.76481	7.97169	8.97578	9.03934	8.52386
173	QCNLEK	6	396.19	790.364	2	8.48863	NaN	NaN	7.63096	NaN	NaN	7.35125	6.99517	NaN	8.42752	8.35636	8.42976	7.12818	7.79815	6.60052	NaN	NaN	NaN	7.65118	7.04979	7.68145	7.67937	6.9696	7.46394
174	TASGGLESYNDPYQV	15	800.859	1599.71	2	14.6558	NaN	NaN	16.2833	14.6278	15.426	15.0446	16.3665	NaN	16.1022	14.7053	14.6728	15.649	13.6522	12.6644	NaN	NaN	13.5348	NaN	NaN	NaN	15.3031	15.2461	16.1739
175	TNGPLPDK	8	421.224	840.434	2	10.0942	NaN	9.58099	10.0882	7.9918	7.77324	9.42347	9.03789	8.44079	9.77387	9.50154	10.5522	10.2685	8.55526	8.84857	NaN	7.40912	7.98451	9.88689	7.86931	9.3694	10.0441	9.03677	9.30316
176	EVTLNADTTCGNDWVCEH	18	707.626	2119.86	3	13.3198	NaN	12.205	13.7266	NaN	10.4655	12.8549	13.1449	10.8402	14.4871	13.7819	12.5171	13.7818	10.6095	10.3923	9.38502	9.96617	NaN	10.5188	NaN	NaN	NaN	NaN	12.5653
177	SLVGSLTNTNFGLCH	15	540.599	1618.78	3	NaN	NaN	10.8616	10.8892	9.25363	8.90957	9.67012	10.419	7.0076	11.18	11.0924	10.3855	NaN	NaN	NaN	NaN	10.1217	NaN	9.6267	8.29554	8.04353	9.65282	10.6142	10.8898
178	VAVSFGSGLGCNTY	14	716.332	1430.65	2	12.6751	8.52407	11.6843	11.0942	12.1663	12.0626	NaN	13.5519	NaN	13.2588	NaN	NaN	13.2343	NaN	10.5087	11.904	11.4891	13.0016	NaN	NaN	NaN	10.4804	12.529	12.7008
179	VVVGEHNLNQNDGTEQ	16	876.911	1751.81	2	16.1235	12.069	16.461	15.0402	12.0419	12.3854	14.8526	13.4219	13.6409	16.4474	16.847	17.0906	14.4693	16.1114	15.5896	12.0651	13.2649	13.9608	15.9508	14.7725	16.2438	15.7254	14.2226	14.7339
180	KLTEDYGQDPAFT	13	742.848	1483.68	2	16.4912	12.7298	16.2836	14.845	13.7333	13.6091	15.6181	15.3951	13.3658	16.8702	16.8672	16.363	13.6799	15.6603	13.0964	15.1348	16.1375	16.7508	15.7475	15.3976	14.8522	16.0161	15.9762	15.9426
181	KLCPHG	6	356.184	710.353	2	9.61096	NaN	9.7297	NaN	NaN	6.84848	9.72939	8.63654	NaN	9.37349	8.98886	9.01663	8.65738	9.64384	9.33118	6.34198	NaN	8.01937	9.44212	9.3355	9.65666	9.48384	8.92225	8.5643
182	EELYNFM	7	473.696	945.379	2	12.717	9.56211	12.5701	12.3063	11.1388	9.93386	12.5043	12.353	10.5364	12.935	12.3162	12.036	10.877	7.69088	9.00072	11.3527	11.7609	12.8425	11.5323	11.4633	11.3594	12.3629	12.5415	12.1168
183	STENAELAENCDK	13	740.815	1479.61	2	13.3755	NaN	NaN	13.815	12.3147	12.5761	13.8919	13.6303	12.5265	13.9176	13.7394	12.9888	13.1295	13.9646	NaN	11.8105	12.7364	13.2592	13.8454	NaN	NaN	14.089	13.9295	13.7881
184	VVNTEAQ	7	380.696	759.376	2	NaN	NaN	NaN	NaN	NaN	NaN	NaN	NaN	NaN	NaN	8.10008	7.20682	NaN	8.54732	NaN	9.76066	NaN	NaN	NaN	NaN	8.69708	7.83423	NaN	NaN
185	SSNPCSETYHG	11	619.74	1237.47	2	NaN	NaN	NaN	12.2626	9.4972	9.26034	11.6073	NaN	NaN	13.0296	12.4489	12.7727	9.17759	11.0117	NaN	12.0845	12.9202	13.5458	9.0649	9.01277	NaN	11.5956	11.1786	NaN
186	LTEDYGQDPA	10	554.744	1107.47	2	NaN	NaN	14.7494	13.5392	12.3333	11.932	13.924	NaN	13.2777	14.7402	15.6562	8.19805	NaN	13.327	NaN	NaN	NaN	14.5028	15.2261	NaN	14.0304	14.8046	NaN	NaN
187	VAEHPQLV	8	446.748	891.481	2	13.0452	NaN	13.1813	NaN	12.7088	11.914	12.3231	14.2517	NaN	13.6519	15.3992	15.2073	11.4577	NaN	8.90307	12.4654	13.1844	14.0113	14.6888	12.0376	12.8991	13.3176	14.5554	14.7246
188	SYCNPGN	7	406.156	810.297	2	NaN	NaN	NaN	9.42121	7.85155	NaN	8.54952	8.99557	8.44364	10.0514	8.84404	7.72713	NaN	NaN	NaN	8.3067	8.02699	9.18832	6.49598	NaN	NaN	9.14238	9.73282	8.37138
189	WDWWGSTV	8	518.729	1035.45	2	11.7808	NaN	10.9256	12.7584	10.4703	9.76804	11.7971	12.0608	9.41239	11.9433	9.91344	8.98643	NaN	NaN	9.40168	9.63227	NaN	11.0445	8.53809	9.11229	8.37962	11.393	11.6602	12.5208
190	CQGGYHV	7	410.672	819.333	2	NaN	NaN	NaN	NaN	NaN	NaN	NaN	NaN	NaN	6.40892	7.30905	NaN	6.81593	8.8315	8.30766	NaN	NaN	NaN	NaN	NaN	6.73925	7.26265	NaN	NaN
191	GLAEGDHGFHVH	12	425.867	1274.58	3	11.7376	8.64062	12.3716	11.2706	9.87607	8.79185	11.4973	11.1937	9.80595	11.18	NaN	NaN	9.04311	NaN	8.68862	10.3005	11.1556	12.0558	NaN	11.6172	11.3246	11.3721	11.4892	11.1407
192	VQLGVLPR	8	441.281	880.549	2	11.606	8.92556	11.4705	12.2933	8.72155	8.60923	12.7959	10.7065	11.2412	11.041	10.7911	11.6569	11.1798	12.4221	12.6815	9.22789	10.3491	10.8198	12.1474	11.8582	12.2335	12.2611	10.8966	10.2751
193	MLCAGYLPNK	10	583.786	1165.56	2	9.87081	NaN	10.1834	NaN	NaN	NaN	10.0421	9.87155	NaN	10.9645	NaN	NaN	9.83559	8.72913	NaN	NaN	NaN	NaN	NaN	NaN	NaN	NaN	NaN	NaN
194	MDCGFHA	7	427.152	852.289	2	10.5658	7.80602	10.7349	10.3195	8.97115	8.31297	9.55025	11.0368	8.81214	11.7691	11.1394	10.0959	8.80401	NaN	7.69465	9.60316	9.99371	11.1975	11.1944	10.5387	9.96585	10.171	10.8004	10.6016
195	VNGQYAVHGV	10	522.759	1043.5	2	13.0158	9.3905	13.0284	NaN	11.2246	NaN	10.5731	NaN	8.98134	13.197	11.7886	10.6476	NaN	NaN	NaN	10.015	NaN	11.7927	9.75256	11.9107	9.26714	NaN	12.1113	NaN
196	PGPNKPAL	8	397.232	792.449	2	12.6223	10.0622	13.1968	11.0982	9.63276	8.85278	10.9821	11.8851	10.4949	13.5578	13.8102	13.734	10.5307	9.55768	9.75085	11.2751	12.0698	12.7295	14.1442	12.2478	12.6228	12.0168	12.3682	12.4595
197	DEGELCLN	8	475.2	948.386	2	12.2428	10.1528	13.5889	11.7475	NaN	NaN	11.8091	NaN	11.5428	11.9409	NaN	12.0133	NaN	9.45516	8.46595	10.5632	NaN	11.4846	14.0552	12.6549	13.2759	12.0863	11.6628	NaN
198	LLTLMEH	7	436.73	871.447	2	NaN	NaN	NaN	8.02582	NaN	7.35127	8.86688	8.79811	NaN	10.1774	9.67232	9.22876	NaN	8.08607	NaN	NaN	NaN	NaN	NaN	9.03315	8.05225	9.07702	8.81878	9.05302
199	FCECDNFNCDR	11	768.769	1535.52	2	8.90125	NaN	NaN	NaN	7.44361	7.34495	8.97084	8.28791	NaN	9.678	NaN	NaN	8.30726	8.86396	8.52234	7.60419	8.51096	9.37415	NaN	NaN	NaN	9.03364	8.73187	8.16381
200	ACQGGYH	7	396.659	791.302	2	8.62311	NaN	8.54017	8.92081	6.94749	NaN	9.18499	8.28009	8.18956	9.03188	10.4491	10.7037	9.21165	9.50559	8.74815	7.22906	8.05575	8.34863	10.9647	8.52626	9.98387	9.41384	8.76582	8.43115
201	LVDLVDELDKDT	12	687.853	1373.69	2	8.68209	NaN	8.49883	NaN	NaN	NaN	7.96367	NaN	NaN	8.7636	9.08665	8.28665	NaN	NaN	NaN	NaN	NaN	8.27891	8.01185	7.72907	NaN	NaN	NaN	NaN
202	LSNAACTYGGVLQN	14	734.351	1466.68	2	8.93586	NaN	8.51075	7.84467	NaN	NaN	NaN	NaN	NaN	NaN	9.09901	8.34021	8.60526	NaN	NaN	NaN	NaN	NaN	NaN	NaN	NaN	NaN	7.81933	8.24549
203	SMLANYL	7	406.696	811.379	2	10.6192	8.46268	10.89	11.0183	11.3494	9.12091	10.5726	11.7704	8.51542	10.9963	10.2754	9.55776	8.60992	NaN	NaN	9.93083	9.28692	11.2825	9.42516	9.04389	NaN	10.1699	11.8015	11.2091
204	VTNPSRWPWE	10	636.311	1270.61	2	NaN	8.70797	12.0803	NaN	8.88489	8.47554	NaN	NaN	11.4256	NaN	NaN	12.3495	10.3458	12.6643	12.0538	9.74416	10.4252	11.3724	NaN	11.8275	12.152	NaN	NaN	11.3284
205	FDCAPDK	7	426.681	851.348	2	7.27303	NaN	NaN	6.38582	NaN	NaN	NaN	NaN	NaN	7.51784	7.12082	7.52889	6.60315	6.99943	6.85711	NaN	NaN	NaN	6.61541	NaN	NaN	6.23892	NaN	NaN
206	VESVNCL	7	410.696	819.38	2	NaN	NaN	NaN	NaN	NaN	NaN	NaN	NaN	NaN	12.9933	NaN	NaN	9.97471	NaN	NaN	NaN	NaN	NaN	NaN	11.5215	12.0027	NaN	NaN	NaN
207	FSTGGNNRAP	10	510.747	1019.48	2	12.5804	NaN	13.4756	12.1892	10.6953	NaN	12.3992	12.4691	11.4549	13.3723	13.8372	14.1215	10.0819	11.5575	9.91198	11.3767	12.4968	13.0095	13.6221	13.0039	13.292	12.7883	12.8376	13.1066
208	TGCTNLNECELGAH	14	788.823	1575.63	2	10.9947	7.88772	11.3117	10.2617	NaN	8.13808	NaN	9.93544	9.58597	10.6336	NaN	9.99276	9.88073	9.15731	9.10616	NaN	9.66574	10.1167	11.1785	11.1037	11.6988	10.1972	10.2908	9.23951
209	VLHDVC	6	371.681	741.348	2	11.8754	8.62638	11.8352	11.9772	10.3107	10.0384	12.0862	11.4752	10.3576	11.7507	11.2131	11.0663	11.4289	12.2673	11.6627	9.44174	10.206	10.9651	11.7065	11.6371	11.907	11.8898	11.5851	11.12
210	LTEELYDFMDLL	12	759.357	1516.7	2	NaN	NaN	NaN	8.44497	NaN	7.96505	NaN	8.76638	NaN	8.46501	8.45324	NaN	NaN	NaN	NaN	NaN	NaN	NaN	NaN	NaN	NaN	NaN	NaN	8.41734
211	TNTNFGLCHDVG	12	667.793	1333.57	2	10.99	NaN	NaN	NaN	9.63665	9.85361	11.0285	NaN	NaN	11.3432	NaN	11.8779	10.5312	NaN	NaN	NaN	NaN	NaN	11.3609	NaN	10.9775	NaN	11.0173	NaN
212	LAEPVEL	7	385.718	769.422	2	9.01476	NaN	13.5538	8.95937	7.86051	NaN	9.22673	8.56188	NaN	8.92876	9.22111	8.54386	9.66716	NaN	NaN	NaN	7.26723	NaN	7.4736	6.18083	11.194	NaN	6.53535	NaN
213	SGSSWAHTCGGT	12	604.244	1206.47	2	10.5713	NaN	10.0993	9.73591	8.49075	NaN	10.1786	10.153	8.71874	11.4766	11.1526	11.1513	8.64695	9.17827	8.39997	9.03215	NaN	10.5909	10.5559	10.1444	9.81817	10.3003	10.1203	10.315
214	LYPTVDYALCSS	12	694.824	1387.63	2	10.6423	NaN	NaN	11.7492	9.40523	NaN	10.9644	NaN	NaN	12.144	12.0036	12.3172	NaN	NaN	10.9824	NaN	NaN	NaN	NaN	NaN	NaN	11.1612	NaN	11.6479
215	TYGYESH	7	428.677	855.34	2	7.90466	NaN	8.47139	NaN	NaN	NaN	NaN	NaN	NaN	8.50879	8.14839	7.77771	NaN	NaN	NaN	7.45105	8.19958	8.83933	8.34709	6.9192	7.20257	NaN	NaN	NaN
216	LDLVAEHPQLV	11	617.345	1232.68	2	11.7614	8.3449	12.0036	NaN	11.4538	10.726	NaN	13.0694	9.76375	NaN	14.0349	13.6355	10.2566	8.97634	NaN	11.3546	NaN	12.8012	13.4075	NaN	NaN	NaN	13.4039	13.6081
217	QTMVCAGGDLR	11	604.281	1206.55	2	14.6384	NaN	13.8329	13.6793	13.882	13.7584	13.879	15.2719	NaN	15.4608	9.29398	NaN	13.5707	10.9418	NaN	NaN	NaN	14.0409	NaN	NaN	NaN	NaN	13.9297	15.31
218	VVGGENALPH	10	496.763	991.509	2	13.3514	NaN	13.5343	11.6685	10.4781	10.0217	11.8243	11.5381	11.2211	13.5729	13.2038	13.3166	11.6034	11.4118	11.34	11.1055	11.596	12.8051	13.579	12.4688	13.2373	12.0154	11.7798	11.7558
219	FNYATYH	7	458.203	914.392	2	10.6608	7.25336	10.421	8.80768	7.93587	7.55967	9.40119	9.35323	7.01831	10.828	8.46692	NaN	8.16253	8.68707	7.67011	8.57989	9.28829	9.87157	NaN	9.71695	7.68468	9.71597	9.67523	9.43299
220	SLVGSLTNTNF	11	576.797	1151.58	2	NaN	10.945	14.9386	13.3574	NaN	NaN	13.1341	12.6802	NaN	14.8534	NaN	15.4196	NaN	NaN	NaN	NaN	11.5805	12.2616	14.5457	14.5742	NaN	NaN	12.9934	NaN
221	LTNSMLCAGASQ	12	626.786	1251.56	2	13.0297	10.1376	13.0755	12.1571	10.8885	10.2711	12.3735	12.5162	NaN	12.8804	12.8637	13.056	12.3825	13.1877	11.9575	NaN	NaN	10.8007	13.0992	12.6258	13.0357	12.1251	11.8676	12.0268
222	SGCQGNSGGPLHCLV	15	772.335	1542.66	2	13.6576	9.56683	12.8453	13.7779	11.2791	10.7303	13.2852	12.6014	11.5097	14.3438	15.0524	15.823	12.6839	13.0756	12.9015	NaN	12.1723	12.7425	13.1895	NaN	12.797	13.8027	12.5147	13.3596
223	EWLSH	5	671.318	670.307	1	NaN	NaN	NaN	NaN	NaN	NaN	NaN	9.27249	NaN	NaN	NaN	NaN	NaN	NaN	NaN	NaN	NaN	NaN	11.3738	9.02174	9.47964	8.89017	8.9866	NaN
224	VDGQYAVH	8	444.715	887.414	2	10.8833	7.86379	12.0008	NaN	7.17067	NaN	NaN	NaN	NaN	9.82017	NaN	NaN	NaN	NaN	NaN	NaN	NaN	NaN	NaN	8.90717	NaN	6.95973	7.75285	9.03383
225	GSYHCLC	7	448.674	895.332	2	9.96729	NaN	8.86109	10.5407	8.1233	7.89688	10.5758	9.29211	8.44885	9.64986	9.26311	9.34593	9.90062	11.0403	10.494	7.47756	8.35959	8.82246	9.10213	9.58443	9.60147	10.0489	9.92138	9.3744
226	LFLQDLK	7	438.763	875.512	2	11.8286	8.49199	11.3251	10.8153	10.1828	10.2013	10.6723	11.6382	8.51775	12.61	9.64228	8.68639	11.2834	10.2201	9.79238	9.82478	10.2215	11.183	8.34551	11.0273	8.66016	10.3011	11.564	11.6946
227	FLEVLKPF	8	496.793	991.574	2	7.27631	NaN	7.57392	NaN	NaN	NaN	NaN	NaN	NaN	6.97932	NaN	NaN	6.85787	NaN	NaN	NaN	NaN	NaN	NaN	NaN	NaN	NaN	NaN	NaN
228	LAPLLSNAAC	10	515.272	1028.53	2	10.8372	NaN	9.78859	12.0792	10.9794	10.4971	11.1857	12.2241	9.40458	NaN	11.3372	10.9561	11.609	10.4087	11.5902	10.3884	10.9225	11.629	10.2838	10.0073	NaN	11.305	NaN	11.5739
229	NYATYH	6	384.669	767.324	2	13.6124	10.3577	13.3872	12.3049	11.6731	11.1711	12.9974	12.9924	11.1295	13.871	11.9684	11.1254	10.4648	10.6083	9.7184	12.3827	12.962	13.7503	10.6837	12.295	10.8123	13.1968	13.5164	13.4184
230	LGEHNLNV	8	448.727	895.44	2	NaN	13.3054	NaN	NaN	NaN	NaN	13.8094	NaN	NaN	NaN	15.6786	16.1295	14.5801	NaN	NaN	NaN	14.0782	NaN	NaN	15.7184	NaN	15.1525	NaN	14.8018
231	LAPLVSSTVC	10	523.781	1045.55	2	11.8712	8.75068	10.7565	12.8185	11.4409	10.8293	12.2882	12.8374	10.3334	13.3775	12.6291	11.9209	12.6404	10.1199	12.1291	10.9895	11.1623	11.8394	11.4325	11.2536	10.323	11.9523	12.1837	12.2532
232	LLTLMEH	7	428.734	855.452	2	10.7047	NaN	9.55602	8.05881	7.88787	NaN	9.18514	9.20824	6.68847	10.3248	9.70559	9.2691	6.67242	7.35184	NaN	9.1839	9.9553	10.5759	NaN	8.25126	7.3507	8.66939	9.47528	9.17455
233	SCAGLSGK	8	390.191	778.364	2	6.27128	NaN	6.5816	6.57041	6.96435	6.99071	NaN	8.06301	NaN	8.17191	NaN	NaN	6.72223	NaN	NaN	6.54803	7.57601	8.24376	NaN	7.33448	NaN	NaN	8.04532	8.14389
234	TSSGFCVGVDPN	12	620.269	1238.52	2	16.7298	NaN	16.4055	16.4179	NaN	NaN	NaN	NaN	14.7407	17.6671	17.4588	17.1242	NaN	NaN	NaN	NaN	15.7129	15.8836	16.1964	NaN	NaN	16.6175	NaN	NaN
235	CADAHPDK	8	457.196	912.376	2	9.57561	NaN	9.68179	9.4825	7.49119	7.35338	9.21288	8.67641	7.63273	10.0405	9.28042	8.80372	9.0896	9.41372	8.97123	NaN	NaN	NaN	8.61269	8.37415	8.66871	9.6113	9.46258	9.37538
236	SWVHQLV	7	434.737	867.46	2	8.52634	NaN	8.037	9.77512	8.68504	8.24927	9.58007	9.65674	8.65945	9.2414	8.26791	7.39703	9.46951	8.75015	NaN	7.37724	7.91743	9.14081	9.26345	9.27944	9.32927	9.02907	9.31147	9.29518
237	ELAEEK	6	359.686	717.354	2	7.57574	NaN	7.55931	NaN	NaN	NaN	NaN	7.44466	NaN	NaN	7.44878	7.13431	NaN	NaN	NaN	NaN	NaN	7.34781	NaN	6.56438	NaN	NaN	7.6425	7.44626
238	STDPCDETYCGSAAESEKET	20	1118.93	2235.84	2	11.7766	NaN	12.2443	NaN	NaN	NaN	10.9043	9.61266	10.4097	12.713	13.5649	12.5187	NaN	NaN	NaN	8.37382	NaN	10.3927	13.7578	11.542	12.7397	12.1949	NaN	NaN
239	TEAPADKDEL	10	544.759	1087.5	2	13.7604	9.5057	13.8913	10.8604	10.8906	10.8594	10.8628	11.7329	NaN	12.4104	11.8178	NaN	11.0815	13.4999	11.6942	10.3086	11.3802	12.1368	12.1506	11.4119	12.0048	11.8352	11.9955	NaN
240	SLQYEK	6	384.2	766.386	2	11.1696	7.09653	10.4081	11.4116	11.1738	10.8413	10.9038	12.6357	8.03026	12.6024	10.1917	NaN	9.84885	NaN	7.46812	9.5989	10.3891	11.1169	7.15623	7.76487	NaN	10.0211	10.3795	12.7214
241	VVNYATCSKGP	11	598.785	1195.55	2	NaN	NaN	NaN	9.92559	NaN	NaN	8.88457	NaN	NaN	NaN	NaN	NaN	9.87648	NaN	9.5726	NaN	NaN	NaN	10.3106	8.20318	10.2944	9.5108	NaN	NaN
242	TPEAELHQG	9	491.236	980.456	2	8.87511	NaN	8.61337	11.4601	10.1531	9.47592	11.4867	11.7038	10.1676	11.7602	10.7831	11.0213	7.87238	6.27851	NaN	9.38057	9.27646	10.4675	10.828	9.08897	9.23564	10.6637	10.646	10.6495
243	NVLDK	5	588.334	587.328	1	10.4917	NaN	NaN	11.7358	NaN	NaN	11.0727	11.6435	NaN	11.8836	NaN	NaN	NaN	NaN	NaN	NaN	9.74509	10.9678	NaN	NaN	NaN	NaN	12.2657	12.6235
244	SNCCQHDTLL	10	624.26	1246.51	2	17.9696	15.0649	17.991	18.168	16.6826	16.339	18.0916	17.0531	16.5155	18.3547	17.9659	17.7047	17.0338	15.2542	16.1347	16.2592	17.0371	17.6687	18.557	18.0273	18.3912	17.7554	17.5372	16.3872
245	SGNENEFR	8	476.712	951.405	2	NaN	NaN	NaN	9.03871	12.5558	13.1338	8.3838	14.0134	NaN	9.37743	7.92229	NaN	10.542	NaN	NaN	9.01876	8.70393	10.0674	NaN	NaN	NaN	NaN	11.4936	12.7323
246	LGCFSDDAPWAGLVQ	15	818.376	1634.74	2	NaN	NaN	NaN	10.3666	NaN	9.85845	NaN	NaN	NaN	11.8708	10.8867	10.916	10.6874	NaN	9.04099	NaN	NaN	NaN	NaN	NaN	NaN	NaN	NaN	NaN
247	WNDAGFGGAGASSNPCSET	19	942.875	1883.74	2	16.7193	NaN	16.324	NaN	13.0268	NaN	NaN	14.901	14.7434	17.8195	17.833	17.6761	NaN	NaN	13.9365	13.5178	14.4397	14.9526	16.4428	15.353	NaN	NaN	16.1979	15.9973
248	AENCDKDLHG	10	579.746	1157.48	2	10.0924	NaN	11.7265	8.3799	6.02041	NaN	9.87567	8.91608	9.50062	NaN	NaN	NaN	NaN	NaN	NaN	8.00756	9.6153	9.93615	12.5299	10.8583	11.4917	10.8386	10.6004	NaN
249	LYVNAVLNHMCGSQ	14	803.869	1605.73	2	NaN	NaN	NaN	9.78943	NaN	9.12848	8.91054	8.79424	NaN	NaN	NaN	NaN	9.94288	NaN	9.50208	NaN	NaN	NaN	NaN	NaN	NaN	NaN	NaN	9.28222
250	VSAYGCNTL	9	492.727	983.438	2	8.23385	NaN	NaN	NaN	7.25034	6.61926	NaN	NaN	NaN	NaN	NaN	NaN	8.68978	NaN	NaN	NaN	NaN	NaN	NaN	NaN	NaN	NaN	NaN	NaN
251	VCLPSASDNFPAGTL	15	775.362	1548.71	2	NaN	NaN	15.1314	15.5131	13.5496	13.4319	NaN	14.3922	13.0747	15.6833	14.9382	15.1586	14.9473	13.5542	14.309	NaN	NaN	13.0355	15.0709	14.2819	15.8506	15.2079	14.2091	14.3756
252	VTVGSLTNTNF	11	576.797	1151.58	2	13.9932	10.945	14.9386	13.3574	11.6494	11.2434	NaN	12.6802	11.4666	NaN	14.4351	15.4196	13.083	12.7166	12.2207	11.1462	11.5805	12.2616	14.5457	14.5742	15.1018	12.8427	12.9934	13.6837
253	DVWKPEPC	8	515.736	1029.46	2	NaN	NaN	NaN	10.177	NaN	NaN	10.9228	10.2	9.38157	NaN	NaN	10.0058	NaN	NaN	NaN	NaN	NaN	NaN	10.5966	10.0225	10.4613	10.6589	NaN	NaN
254	GTLQPDNTH	9	491.733	981.452	2	10.6949	7.48305	10.8146	NaN	NaN	NaN	NaN	NaN	NaN	10.5024	9.98755	9.62608	8.93866	NaN	NaN	NaN	NaN	NaN	10.2178	8.96899	10.3968	NaN	NaN	9.01332
255	FLVDNP	6	352.683	703.354	2	NaN	NaN	NaN	NaN	NaN	NaN	10.552	NaN	9.06534	9.21971	9.28139	9.89165	7.86669	9.26921	NaN	NaN	NaN	NaN	NaN	NaN	NaN	9.86342	9.49926	NaN
256	VCNYVNWLEGGK	12	719.842	1437.67	2	NaN	NaN	NaN	9.98639	NaN	9.00456	NaN	NaN	NaN	NaN	NaN	NaN	NaN	NaN	NaN	NaN	NaN	NaN	NaN	NaN	NaN	NaN	NaN	NaN
257	LEELYDFM	8	530.24	1058.46	2	NaN	NaN	NaN	8.53336	NaN	NaN	7.69029	NaN	NaN	NaN	8.39401	9.60637	NaN	NaN	NaN	9.25364	9.71858	10.4551	NaN	NaN	NaN	NaN	NaN	8.18407
258	AYLTLH	6	359.2	716.386	2	9.01507	NaN	6.45655	7.1968	NaN	NaN	NaN	7.24905	NaN	9.05177	8.19274	8.34412	NaN	7.23788	NaN	8.1903	8.83195	9.78442	7.01293	7.26546	NaN	NaN	6.76702	7.42752
259	DSLFVHEK	8	487.752	973.487	2	9.29072	NaN	NaN	NaN	7.95707	8.28181	9.31816	NaN	NaN	9.9848	NaN	NaN	8.92849	NaN	NaN	7.5871	8.60678	9.65272	NaN	NaN	NaN	NaN	NaN	NaN
260	LGLNLALEKDYV	12	674.871	1347.73	2	8.41182	NaN	7.02278	10.7474	8.04564	8.44951	9.07685	10.5301	NaN	9.18094	9.05657	NaN	9.79639	7.82347	NaN	NaN	NaN	NaN	NaN	NaN	NaN	9.55711	10.1553	10.604
261	YCTDPT	6	378.646	755.28	2	NaN	6.47825	8.32662	9.18941	7.90551	NaN	9.39657	8.188	8.68772	8.30615	8.95779	8.71086	NaN	NaN	6.218	7.47815	8.16302	8.45803	10.2318	7.96536	9.25767	9.483	9.11074	8.31648
262	ALLDNLDL	8	443.746	885.481	2	NaN	NaN	9.34246	NaN	NaN	NaN	8.5328	NaN	7.84449	10.1995	NaN	11.0817	8.51389	8.49257	8.17787	9.45159	10.338	NaN	10.0892	NaN	9.33222	NaN	9.51604	9.80053
263	FLLHGF	6	367.205	732.396	2	10.0338	6.88464	10.2251	7.61226	NaN	NaN	7.10572	NaN	NaN	8.87298	8.16045	9.10339	NaN	NaN	7.25811	NaN	NaN	7.34537	8.16373	7.93545	8.51607	7.19222	6.94755	NaN
264	FSTGGDNRAPLWL	13	717.361	1432.71	2	10.231	NaN	NaN	10.4756	NaN	NaN	9.83945	10.7037	NaN	11.3136	12.0103	NaN	NaN	NaN	NaN	NaN	9.69422	10.3876	NaN	NaN	NaN	NaN	NaN	NaN
265	LFQEVLNLGGEA	12	645.832	1289.65	2	11.5778	NaN	11.2958	13.5962	11.3664	12.298	11.5406	13.0964	10.0196	13.4375	13.2468	12.3447	12.232	10.4487	10.8731	9.58394	NaN	NaN	10.4608	NaN	11.1465	12.4766	12.2354	13.2216
266	AYLTLHS	7	402.716	803.418	2	10.8139	NaN	NaN	8.29458	NaN	NaN	NaN	NaN	NaN	9.38708	8.98839	8.79996	8.54719	NaN	NaN	7.6639	8.54078	9.01368	NaN	NaN	8.77297	NaN	NaN	7.60175
267	NFGLCHDVG	9	509.724	1017.43	2	12.6332	NaN	13.069	13.656	11.5989	10.9946	13.7853	13.0406	12.6628	14.2254	14.6091	15.3338	12.9332	12.8939	12.427	10.7985	11.5414	12.1558	13.981	13.0142	13.5451	13.5445	13.2854	13.3745
268	NAGDLFVHP	9	485.243	968.472	2	NaN	NaN	NaN	NaN	NaN	NaN	NaN	NaN	NaN	NaN	NaN	12.0707	NaN	10.6232	NaN	NaN	NaN	NaN	11.9109	8.9424	11.0547	10.461	NaN	NaN
269	LFDEHAT	7	416.696	831.376	2	9.22964	6.09034	9.47079	9.09935	8.10893	NaN	9.2343	9.70379	8.34675	9.19197	8.94733	8.80189	8.43511	7.79567	7.07746	7.73978	8.80505	9.55544	9.98184	9.20308	9.48089	9.44781	9.76386	9.63326
270	NFNAGWC	7	435.166	868.317	2	NaN	7.52439	10.504	8.07857	NaN	NaN	7.8608	NaN	7.25326	9.5903	NaN	10.762	NaN	NaN	NaN	8.64052	9.27651	NaN	NaN	NaN	9.53805	8.20266	NaN	NaN
271	NDACEAFLCNCDR	13	822.813	1643.61	2	NaN	NaN	NaN	10.4412	NaN	9.80329	10.2896	10.4676	NaN	10.4991	NaN	NaN	9.96273	NaN	9.14271	8.51383	NaN	NaN	NaN	NaN	7.8137	NaN	NaN	9.70935
272	WYNNVLNPTLPR	12	743.893	1485.77	2	9.3078	NaN	NaN	9.51092	NaN	8.40081	NaN	9.63368	NaN	10.3418	NaN	NaN	NaN	NaN	NaN	NaN	9.09861	10.4199	NaN	NaN	NaN	NaN	10.3456	10.551
273	HWSGNCC	7	460.662	919.306	2	11.648	9.16971	12.3057	12.3411	NaN	7.62965	13.286	11.2204	11.9852	12.3992	12.5448	12.089	10.6154	12.3378	11.0755	10.5513	11.5934	11.9018	13.1465	11.8005	12.626	13.1823	12.3153	11.3061
274	VNHATC	6	351.648	701.28	2	NaN	NaN	NaN	NaN	NaN	NaN	NaN	NaN	NaN	NaN	8.97642	9.08821	NaN	NaN	NaN	NaN	NaN	NaN	8.78743	NaN	NaN	NaN	NaN	NaN
275	GHSLGSHAAGEAG	13	575.766	1149.52	2	NaN	NaN	NaN	NaN	NaN	NaN	NaN	NaN	NaN	9.7259	9.13735	8.81329	NaN	NaN	NaN	NaN	NaN	NaN	NaN	NaN	NaN	NaN	NaN	NaN
276	FLLHGFLDK	9	363.873	1088.6	3	10.0298	NaN	NaN	9.72614	NaN	8.06008	NaN	9.0645	NaN	NaN	NaN	NaN	11.0364	NaN	9.98739	NaN	NaN	NaN	9.14346	9.02529	9.47835	NaN	NaN	9.65274
277	DQGTLDK	7	388.693	775.371	2	8.07708	NaN	7.83341	7.48586	NaN	NaN	7.44372	6.74817	NaN	7.68648	6.98264	NaN	7.59789	NaN	7.85027	NaN	NaN	NaN	7.08875	6.64961	7.39513	7.40648	6.84759	7.17518
278	SNCCQHDT	8	511.179	1020.34	2	11.957	7.39038	12.05	9.36789	7.67739	8.66902	9.50256	NaN	8.4594	10.232	11.002	11.1082	NaN	11.365	10.7232	7.85025	9.15028	8.82491	11.1882	9.82907	10.3027	10.1184	9.14399	9.0597
279	FLVDNPYTNSY	11	666.808	1331.6	2	11.3622	NaN	10.1946	12.0419	12.0754	11.3873	11.7839	13.0038	9.31194	12.5107	NaN	NaN	11.0117	NaN	NaN	10.7928	10.4281	11.9303	NaN	10.4327	NaN	10.6943	12.0404	11.8987
280	DSMVCAGGDGV	11	534.211	1066.41	2	12.3194	8.86075	8.54239	10.7998	9.31565	8.54998	10.7332	10.6801	NaN	12.485	9.08183	12.3605	NaN	NaN	NaN	9.57858	10.1758	10.94	NaN	10.7118	NaN	NaN	NaN	11.0035
281	LLYPYG	6	363.196	724.38	2	9.81372	7.05987	9.67886	9.61799	NaN	NaN	9.64131	9.27676	8.52343	11.5904	10.9988	10.4085	7.62257	NaN	7.38976	8.85476	9.63865	10.3076	10.8949	NaN	9.64057	10.1379	9.67265	10.1076
282	AQNCDKDLHGW	11	448.86	1343.56	3	NaN	7.22617	NaN	NaN	NaN	NaN	NaN	9.72835	NaN	NaN	NaN	NaN	NaN	NaN	NaN	8.56616	NaN	9.93372	10.358	NaN	11.1493	9.42496	NaN	7.81876
283	NDLSSLK	7	388.711	775.408	2	NaN	6.91591	NaN	8.92506	NaN	NaN	8.81209	NaN	7.55074	NaN	7.40483	8.09051	8.59959	NaN	7.03594	NaN	NaN	9.1488	9.20918	8.68999	NaN	NaN	9.5879	7.67363
284	TLNHPY	6	372.688	743.36	2	11.0041	8.18303	11.7288	9.22471	8.81893	NaN	9.97955	9.60133	8.31905	10.5396	9.20597	8.45133	NaN	NaN	NaN	10.1292	10.9404	11.7224	10.234	10.5497	10.0654	10.4303	10.4187	9.98006
285	VNGQYAVHG	9	473.225	944.435	2	12.4601	8.94793	12.7096	NaN	NaN	NaN	NaN	10.5845	NaN	13.1814	NaN	10.2188	NaN	NaN	NaN	NaN	NaN	NaN	NaN	10.1236	NaN	NaN	10.4319	NaN
286	AGFEGTACDR	10	542.23	1082.45	2	8.87128	NaN	8.85812	NaN	NaN	NaN	NaN	7.53395	NaN	9.03454	NaN	NaN	7.80736	8.75398	8.56745	7.09318	NaN	NaN	NaN	8.55171	NaN	NaN	NaN	NaN
287	VNHATCS	7	395.164	788.312	2	8.75077	NaN	NaN	NaN	NaN	NaN	NaN	NaN	NaN	NaN	NaN	NaN	NaN	8.31599	NaN	NaN	NaN	NaN	NaN	NaN	NaN	8.29904	NaN	7.96673
288	DLALEKDY	8	483.742	965.47	2	10.1746	NaN	NaN	11.8754	9.89622	9.69169	11.5344	NaN	10.6638	11.0973	11.5423	10.8473	11.8488	NaN	NaN	NaN	NaN	9.6034	10.0041	NaN	NaN	10.8005	11.0592	10.004
289	ADGSWQVH	8	450.203	898.393	2	8.31892	NaN	9.26078	8.28048	NaN	NaN	8.04381	7.57995	8.02867	8.27472	8.8184	9.36921	7.84812	NaN	NaN	NaN	NaN	NaN	8.87679	NaN	9.12799	8.68436	7.64108	8.25573
290	TMVV	4	449.242	448.236	1	13.4676	NaN	NaN	NaN	NaN	NaN	NaN	NaN	NaN	NaN	13.8562	13.9835	NaN	NaN	12.6604	NaN	NaN	NaN	14.8061	13.4931	14.4384	14.6785	NaN	NaN
291	SSNPCSETY	9	522.701	1043.39	2	9.13687	NaN	NaN	9.74128	9.31899	8.08142	9.77161	9.22775	8.03303	10.5387	NaN	NaN	NaN	NaN	NaN	10.7155	11.253	11.8814	NaN	NaN	NaN	9.46051	9.81737	NaN
292	ADSLLNPDGFAGFPCDS	17	891.884	1781.76	2	NaN	NaN	13.7001	NaN	NaN	NaN	NaN	NaN	NaN	14.1803	14.2937	NaN	11.7173	NaN	NaN	NaN	11.3815	NaN	NaN	NaN	NaN	NaN	NaN	NaN
293	TSGSFCVGVDPNR	13	698.32	1394.62	2	11.5466	NaN	NaN	NaN	14.7819	15.5302	NaN	16.1318	NaN	12.0941	NaN	NaN	14.6906	NaN	10.124	11.8596	11.688	13.3652	NaN	10.0148	NaN	NaN	14.464	16.0749
294	DPGLPGGTYCDVLSGDK	17	875.9	1749.79	2	15.3895	11.4179	15.1896	NaN	12.4064	12.599	NaN	NaN	12.1433	NaN	13.8206	NaN	14.5804	14.2469	14.2651	NaN	NaN	12.1906	NaN	13.1122	13.5944	14.3406	13.5793	NaN
295	QLGSSYEGRPL	11	603.809	1205.6	2	NaN	8.04647	11.5469	10.8003	9.98886	9.49432	11.0355	12.0137	NaN	13.223	13.5378	13.8861	NaN	10.1378	NaN	10.5015	11.3525	12.245	12.2572	11.2024	NaN	11.6524	11.8228	12.0357
296	NGVFQH	6	351.171	700.329	2	8.17155	NaN	7.29024	7.77396	7.20526	6.84696	7.20908	7.58226	NaN	7.59581	NaN	6.41963	7.08181	7.08801	NaN	NaN	NaN	NaN	NaN	NaN	NaN	7.27771	NaN	NaN
297	GLCHDVG	7	379.169	756.322	2	12.5887	NaN	13.4941	11.468	NaN	NaN	NaN	10.7954	NaN	13.0381	13.1318	14.6086	NaN	11.9144	10.862	NaN	10.2503	10.7473	13.4089	13.1871	13.864	11.349	11.3079	11.6436
298	TVVGSLTNT	9	446.242	890.471	2	NaN	8.42838	NaN	NaN	NaN	NaN	11.5847	10.9936	10.6112	12.2034	12.6781	13.6834	10.7386	10.4524	9.99963	8.85409	9.35201	9.92224	NaN	NaN	11.6185	11.3363	NaN	NaN
299	LGMFDLH	7	416.705	831.395	2	8.77562	NaN	8.23317	NaN	7.37493	NaN	NaN	8.7372	NaN	9.39581	7.18083	NaN	6.83279	NaN	NaN	7.09075	7.42303	8.54931	6.93993	8.14147	NaN	NaN	8.52128	8.38546
300	VYDFCSQETV	10	624.266	1246.52	2	12.2097	NaN	NaN	10.6663	NaN	NaN	NaN	9.9436	NaN	11.8799	11.2993	12.0371	NaN	NaN	9.89647	NaN	8.49747	NaN	NaN	NaN	NaN	NaN	NaN	NaN
301	LVVHPYW	7	457.25	912.486	2	10.7489	6.98014	11.095	8.05116	8.3848	NaN	8.37211	9.79957	NaN	9.81959	8.82101	7.7795	8.02435	NaN	NaN	9.15904	9.29975	10.8235	8.61698	10.0803	NaN	8.46929	9.40189	9.67492
302	NNPYQV	6	368.169	734.324	2	NaN	NaN	NaN	10.203	8.5407	7.61839	9.15621	9.59412	7.40022	9.86294	NaN	9.32533	9.16681	NaN	NaN	7.17753	NaN	8.20616	NaN	NaN	NaN	8.96524	9.08917	9.59325
303	WDWGSTV	7	425.69	849.366	2	9.50067	NaN	8.37028	10.8213	9.98899	8.62023	10.1031	10.8595	NaN	11.288	10.7516	9.72592	11.6299	7.68918	7.39347	9.358	9.69852	10.753	7.06253	6.69962	NaN	NaN	8.76601	10.5085
304	CALPGSHPL	9	476.238	950.464	2	NaN	12.4269	NaN	13.2273	11.6109	NaN	12.9011	12.7482	NaN	13.9434	NaN	13.4562	12.1338	NaN	10.7667	NaN	NaN	12.6686	15.2565	NaN	14.3871	13.5087	13.4714	12.6296
305	VSNYLNWL	8	505.253	1008.49	2	7.27011	NaN	7.32488	NaN	NaN	NaN	NaN	NaN	NaN	6.84717	7.07464	NaN	NaN	NaN	NaN	NaN	7.06044	NaN	NaN	NaN	NaN	NaN	NaN	NaN
306	KLTEDYGQDPA	11	618.791	1235.57	2	14.692	11.2896	15.0779	13.7256	12.1843	11.6927	14.1982	13.9963	13.2825	15.2111	16.4293	16.21	12.4367	14.1321	12.3161	13.3024	14.5225	14.9498	15.5349	13.6938	14.1973	15.2544	14.794	15.0335
307	SAWDFDDGKC	10	600.735	1199.46	2	NaN	NaN	NaN	NaN	NaN	NaN	9.71567	NaN	NaN	9.88093	11.007	NaN	NaN	NaN	NaN	NaN	NaN	NaN	NaN	NaN	NaN	NaN	NaN	NaN
308	APVLDDSSC	9	482.208	962.402	2	NaN	NaN	10.8754	NaN	NaN	NaN	NaN	NaN	NaN	NaN	NaN	10.0052	9.87273	9.89568	NaN	NaN	NaN	NaN	NaN	NaN	NaN	NaN	NaN	NaN
309	LDPSDAK	7	373.19	744.365	2	7.45063	NaN	7.18789	NaN	NaN	NaN	NaN	NaN	NaN	8.31962	NaN	NaN	7.93627	NaN	NaN	NaN	7.54453	NaN	NaN	6.83752	NaN	NaN	NaN	7.92129
310	STENAELAENCDKDLHGW	18	696.969	2087.89	3	14.897	NaN	NaN	NaN	NaN	NaN	NaN	NaN	13.2162	NaN	11.2564	NaN	14.1984	13.0696	NaN	NaN	NaN	NaN	NaN	NaN	NaN	14.7207	NaN	NaN
311	DGVFQHTC	8	482.204	962.392	2	9.96402	NaN	9.78369	NaN	NaN	7.15395	NaN	7.82629	NaN	NaN	NaN	NaN	NaN	NaN	7.35758	NaN	NaN	NaN	NaN	8.00305	8.05859	NaN	6.47554	8.17063
312	STENAELAENCNKDLHG	17	634.943	1901.81	3	NaN	NaN	NaN	NaN	NaN	NaN	16.2522	NaN	NaN	NaN	NaN	NaN	NaN	16.7481	15.8116	14.7042	NaN	16.0522	NaN	16.1794	NaN	NaN	NaN	NaN
313	TLMEHTL	7	422.715	843.416	2	11.7147	NaN	11.7791	NaN	9.72897	8.20008	NaN	10.7761	NaN	11.2692	NaN	NaN	NaN	NaN	NaN	10.5722	11.3451	12.4584	NaN	11.4602	NaN	NaN	11.4955	10.7825
314	LYQASGGTLNWTYNQGLK	18	1008	2013.98	2	NaN	NaN	10.8802	NaN	NaN	NaN	NaN	NaN	NaN	NaN	NaN	NaN	NaN	NaN	NaN	NaN	10.0082	10.8041	NaN	NaN	NaN	NaN	NaN	NaN
315	LADLDNFSGSFCNEGK	16	887.882	1773.75	2	12.2843	NaN	11.3253	10.0208	NaN	9.71143	NaN	NaN	NaN	NaN	NaN	NaN	12.3476	NaN	NaN	7.87829	NaN	NaN	NaN	10.192	NaN	NaN	9.98427	10.826
316	VGNSCTGLH	9	472.716	943.418	2	8.35763	NaN	NaN	7.68822	NaN	NaN	7.1397	NaN	NaN	7.80786	7.46728	8.65252	NaN	NaN	NaN	NaN	NaN	NaN	7.45868	NaN	7.11634	8.14611	NaN	NaN
317	FLVDN	5	607.308	606.301	1	NaN	NaN	8.29843	NaN	NaN	NaN	10.1008	10.3731	8.78529	9.85104	NaN	NaN	9.37944	NaN	NaN	NaN	NaN	8.45858	9.71102	NaN	9.06343	10.357	NaN	10.0914
318	MDCGFH	6	383.636	765.257	2	NaN	NaN	7.14484	NaN	NaN	NaN	NaN	NaN	NaN	7.61075	8.13314	7.94694	6.73686	NaN	NaN	NaN	NaN	NaN	8.20529	NaN	7.68862	NaN	NaN	NaN
319	LDTGLHS	7	371.691	741.366	2	11.2367	8.55461	12.4792	10.4949	8.97798	8.05984	10.546	11.0189	9.54809	11.6853	11.9277	11.5506	NaN	10.6994	8.4916	11.1632	12.3545	12.8001	11.9526	10.8582	10.5885	11.2857	11.4877	11.343
320	FSGSGLGCNT	10	500.214	998.413	2	10.806	8.06311	NaN	11.494	NaN	NaN	NaN	9.40865	NaN	NaN	11.9247	12.3637	NaN	10.4877	10.8614	NaN	10.3101	11.1525	11.689	NaN	11.4868	11.5945	NaN	NaN
321	SMLADYLN	8	463.717	925.422	2	12.6771	9.72059	10.6989	13.8136	11.6819	10.3684	13.0263	12.5292	10.2573	13.8918	12.8722	12.3916	NaN	11.2297	NaN	11.628	11.4805	12.7825	9.8761	10.1917	9.1159	12.4504	13.065	12.7558
322	ESGFCANVGGDGGSGGE	17	779.291	1556.57	2	11.5872	7.55505	11.3044	9.27686	NaN	NaN	NaN	NaN	NaN	11.0474	11.1056	11.2237	10.6468	11.4032	11.0601	NaN	NaN	NaN	10.7317	9.86603	11.0348	9.93808	NaN	NaN
323	QGWWDNGSNQ	10	596.245	1190.47	2	10.0052	NaN	NaN	NaN	10.3184	9.35617	NaN	11.0913	8.69883	NaN	NaN	NaN	NaN	NaN	NaN	NaN	NaN	9.31909	NaN	NaN	NaN	NaN	10.6266	11.134
324	LSWLNNVLAS	10	558.806	1115.6	2	12.3595	NaN	11.5518	NaN	9.54845	9.58938	11.3479	NaN	NaN	11.5308	10.3814	NaN	10.086	NaN	NaN	NaN	9.22114	10.0062	10.2117	10.9704	NaN	NaN	10.6961	10.0493
325	SAVCLPSASDDFPAGTL	17	854.397	1706.78	2	13.5614	NaN	13.0282	13.4447	11.5234	NaN	12.4374	12.5523	NaN	13.8214	12.8507	13.0906	13.5159	NaN	12.8044	NaN	NaN	NaN	NaN	NaN	13.6412	13.2369	NaN	NaN
326	TSAF	4	425.203	424.196	1	8.3659	NaN	9.00193	NaN	NaN	NaN	NaN	NaN	NaN	NaN	NaN	NaN	NaN	NaN	NaN	NaN	NaN	NaN	NaN	NaN	NaN	NaN	NaN	NaN
327	DGVWTALPL	9	486.263	970.512	2	6.9976	NaN	NaN	7.34145	NaN	NaN	NaN	NaN	NaN	8.56266	7.32948	7.74581	7.29403	NaN	NaN	NaN	NaN	NaN	NaN	NaN	NaN	NaN	NaN	NaN
328	GSSLGCNYYHKPS	13	490.555	1468.64	3	10.3901	NaN	10.2076	10.4829	NaN	NaN	NaN	NaN	NaN	11.8927	11.3154	11.7268	9.45359	NaN	8.94144	8.35394	NaN	NaN	10.1522	NaN	8.82812	10.6822	NaN	10.5508
329	SAWNFNDGK	9	520.228	1038.44	2	16.5988	12.853	15.8126	17.3559	15.9411	15.7697	16.6683	17.7203	15.0429	17.4347	NaN	15.8261	15.9288	12.7842	13.3276	14.3126	14.3665	15.2861	14.2232	14.3837	13.4262	10.8672	17.2613	17.7884
330	VSFGSGLGCNT	11	549.747	1097.48	2	10.9278	8.31305	NaN	11.5401	NaN	NaN	11.4082	NaN	10.4788	12.5864	12.6035	12.6726	NaN	NaN	NaN	10.4152	10.5287	11.8579	11.557	10.0172	NaN	11.6746	11.0794	11.0894
331	QCGGVLVDPK	10	536.775	1071.54	2	11.3094	8.5534	11.8286	NaN	NaN	NaN	NaN	NaN	7.72903	NaN	NaN	9.59142	9.14292	10.4736	8.3337	NaN	NaN	NaN	9.99685	10.1398	10.0988	9.66722	9.90939	10.3132
332	ADGLYSDPKDST	12	634.786	1267.56	2	NaN	8.02451	11.2752	NaN	NaN	NaN	11.7141	NaN	NaN	11.5378	12.6543	11.9963	NaN	12.4476	10.9287	NaN	NaN	10.2494	NaN	NaN	11.5407	NaN	NaN	NaN
333	LLCPGGEGFRPNPL	14	763.892	1525.77	2	NaN	NaN	13.318	13.9138	NaN	11.8999	13.6561	13.8095	11.9061	12.9352	NaN	12.3754	13.29	12.9948	NaN	NaN	NaN	NaN	12.73	NaN	12.8906	NaN	13.6451	13.7156
334	TFHFQCAQ	8	519.726	1037.44	2	12.879	9.62735	NaN	12.2128	10.7368	NaN	NaN	11.6517	11.3576	13.0696	12.9532	12.3866	11.6357	11.9669	11.4675	9.87531	NaN	11.252	12.2995	12.0617	12.3748	12.5934	12.2225	11.337
335	NNVLNPTLPR	10	569.322	1136.63	2	12.0354	8.95944	11.6006	NaN	NaN	NaN	9.73208	10.2106	NaN	11.1013	10.2213	9.60019	10.7669	11.7161	11.544	NaN	10.8053	NaN	11.5676	11.9457	11.609	NaN	10.4743	10.8454
336	LLAPGQEVWADK	12	663.855	1325.7	2	NaN	NaN	NaN	NaN	NaN	NaN	NaN	NaN	NaN	10.6285	NaN	9.41965	10.0052	10.2117	9.86992	9.128	NaN	NaN	NaN	NaN	NaN	NaN	NaN	NaN
337	YDPCYVTGWG	10	609.249	1216.49	2	NaN	NaN	NaN	NaN	NaN	NaN	NaN	NaN	NaN	NaN	9.85581	NaN	NaN	NaN	NaN	7.94657	NaN	NaN	9.45443	9.16646	10.4513	NaN	NaN	NaN
338	GFLYKPDL	8	476.76	951.506	2	11.8863	8.64672	11.6949	11.8776	NaN	NaN	11.8114	8.78853	10.0394	10.9275	11.1389	10.9877	11.1051	13.2105	12.5361	NaN	8.81562	9.11969	10.8526	11.5689	11.8583	11.2223	9.7592	9.48707
339	LQLGSSYEG	9	477.232	952.45	2	14.0231	11.0849	13.7711	13.4634	NaN	NaN	13.4478	NaN	11.8652	14.4814	7.58366	14.214	10.682	12.9744	NaN	12.729	13.4869	13.8467	13.5279	12.8975	12.7168	14.0307	13.5505	13.2597
340	NNLEVEDQEGS	11	617.757	1233.5	2	15.8438	NaN	15.9367	14.6024	13.4246	13.9035	14.3532	14.094	13.7667	15.8155	15.6324	16.0837	13.9427	15.7763	14.624	12.8017	NaN	13.7883	15.5953	14.256	15.6456	15.3479	14.549	15.1655
341	VTGHLLV	7	369.729	737.444	2	10.4632	7.87268	10.2297	10.887	9.467	8.4096	9.91061	10.8198	8.86542	11.3313	11.548	10.9652	10.092	9.0469	9.42633	10.297	11.2836	11.8144	13.0544	11.7848	11.9954	10.7847	11.3055	10.9426
342	SNAPNLPK	8	420.732	839.45	2	8.86139	NaN	8.7979	9.34795	8.13173	7.96318	8.45176	9.47011	6.9566	9.53256	9.03939	8.27351	7.98872	7.29308	7.70595	8.08676	9.05469	9.73638	9.06162	9.31718	8.47087	8.38786	9.12524	9.18452
343	LAPSACAPAGTL	12	564.789	1127.56	2	NaN	NaN	NaN	11.9084	10.2676	NaN	NaN	12.0193	NaN	11.7984	NaN	NaN	NaN	NaN	NaN	NaN	NaN	NaN	NaN	NaN	NaN	NaN	NaN	11.2259
344	QSTDPCNETYCGSAAESEK	19	1067.91	2133.81	2	13.1996	NaN	13.5432	11.3485	NaN	NaN	11.2718	11.4339	10.0777	12.371	NaN	11.2881	11.581	12.5703	12.1074	8.91943	NaN	11.0546	12.4974	12.1897	13.2352	NaN	11.8924	NaN
345	YYQCAN	6	409.66	817.306	2	NaN	NaN	NaN	8.76317	NaN	NaN	NaN	NaN	NaN	NaN	9.15442	9.07057	NaN	9.55025	NaN	NaN	NaN	NaN	8.41492	NaN	8.29583	8.84754	NaN	NaN
346	FLSLHS	6	352.192	702.37	2	NaN	NaN	NaN	NaN	8.2953	7.17392	9.52053	9.36595	NaN	10.4173	9.28331	8.69102	NaN	NaN	NaN	NaN	NaN	8.57066	NaN	NaN	NaN	6.5961	8.61221	9.2716
347	SYEGRPL	7	411.211	820.408	2	NaN	NaN	10.0685	NaN	NaN	NaN	NaN	NaN	NaN	NaN	11.331	NaN	NaN	NaN	NaN	11.0716	12.266	12.5642	11.1064	10.0667	10.4672	NaN	10.0078	NaN
348	VSNAACTYGGVLNQ	14	727.342	1452.67	2	10.0976	NaN	9.55904	NaN	NaN	8.6001	8.41107	10.1143	NaN	NaN	NaN	NaN	NaN	NaN	NaN	NaN	NaN	8.90676	NaN	NaN	NaN	NaN	NaN	9.78687
349	LSFGNEGNS	9	462.707	923.398	2	8.57868	NaN	NaN	NaN	8.88813	NaN	9.08832	NaN	8.69218	10.62	11.0328	10.451	NaN	8.58934	8.9947	NaN	NaN	NaN	NaN	10.0683	NaN	NaN	10.5424	NaN
350	LALDNLDL	8	443.746	885.481	2	9.31301	NaN	9.34246	8.34016	7.01684	NaN	NaN	8.79922	NaN	10.1995	10.7263	11.0817	NaN	NaN	NaN	9.45159	10.338	10.6121	10.0892	8.09433	9.33222	9.52709	9.51604	9.80053
351	ELGDHLTNLH	10	383.528	1147.56	3	9.03376	NaN	NaN	NaN	6.94388	NaN	NaN	10.1849	NaN	9.62851	7.76059	8.72087	8.30316	NaN	NaN	NaN	7.41609	10.1527	NaN	8.17757	NaN	NaN	10.111	10.1073
352	MLCAGYLPGGK	11	583.786	1165.56	2	9.87081	NaN	NaN	10.06	8.75951	NaN	NaN	NaN	7.89612	NaN	8.40232	NaN	9.83559	NaN	NaN	NaN	7.94279	9.20983	NaN	NaN	NaN	9.72136	10.2047	9.88548
353	LVVTNPSRPWWE	12	742.387	1482.76	2	NaN	NaN	NaN	NaN	NaN	NaN	NaN	NaN	NaN	10.3208	10.7287	NaN	NaN	NaN	NaN	NaN	NaN	NaN	9.3092	NaN	NaN	10.6392	NaN	9.76163
354	TTGHSYE	7	397.669	793.324	2	8.57237	NaN	8.35831	NaN	NaN	NaN	7.98241	NaN	7.85067	8.7693	12.1848	12.5905	NaN	8.78568	NaN	NaN	NaN	NaN	12.7843	7.05522	11.8224	9.11087	NaN	NaN
355	VAVFNENC	8	477.204	952.396	2	10.101	NaN	NaN	10.0609	7.06926	NaN	10.3195	NaN	NaN	10.7425	10.9893	10.6859	NaN	10.5279	NaN	NaN	NaN	NaN	NaN	8.78892	NaN	NaN	NaN	NaN
356	LTQELYDFM	9	580.762	1159.51	2	15.6336	NaN	15.1843	14.763	13.3535	12.8854	14.8145	15.2086	NaN	16.2923	15.6337	NaN	NaN	10.3816	NaN	NaN	NaN	15.1583	13.911	13.5843	13.5771	14.9989	NaN	15.2941
357	TLNSYVQLGVLPR	13	730.416	1458.82	2	NaN	NaN	10.0985	NaN	8.58935	9.57395	NaN	NaN	NaN	NaN	NaN	NaN	NaN	NaN	NaN	NaN	NaN	NaN	NaN	NaN	NaN	NaN	10.4511	NaN
358	TSGSFCVGVDPN	12	620.269	1238.52	2	16.7298	13.1703	16.4055	NaN	14.7747	14.7365	16.2333	16.1056	NaN	17.6671	17.4588	17.1242	15.5743	15.0866	13.9282	14.7546	15.7129	15.8836	16.1964	15.2553	15.4264	16.6175	16.4242	16.5967
359	WSGNCC	6	392.131	782.248	2	NaN	NaN	6.9683	6.70792	NaN	NaN	7.13531	NaN	NaN	7.49517	NaN	6.66477	NaN	NaN	NaN	NaN	6.62133	NaN	7.78017	NaN	NaN	NaN	6.64256	NaN
360	NSMVCAGGDGV	11	541.716	1081.42	2	11.6769	8.19701	11.3192	11.6737	10.2632	8.1503	10.9119	12.0443	8.96901	13.2135	12.2751	11.5559	10.3901	9.06846	8.04201	11.5341	12.1741	12.9644	9.21523	12.0422	10.1038	11.0613	9.23927	12.2491
361	VTVGSLTNTN	10	503.263	1004.51	2	NaN	NaN	NaN	10.7566	NaN	8.79433	10.5248	NaN	NaN	NaN	NaN	15.1646	10.887	11.9115	NaN	NaN	NaN	NaN	13.4506	12.0074	13.1339	10.7663	10.9334	NaN
362	WNDAGFGGAGASSNPCSETY	20	1024.41	2046.8	2	NaN	NaN	NaN	NaN	13.1163	12.4107	NaN	14.186	NaN	NaN	NaN	NaN	NaN	NaN	NaN	NaN	NaN	13.629	NaN	12.7574	NaN	NaN	NaN	14.0523
363	LELVTNPDGF	10	552.782	1103.55	2	NaN	7.86068	12.0812	NaN	NaN	NaN	7.95373	NaN	7.26852	9.28007	9.07486	8.82202	NaN	NaN	NaN	10.7718	11.5254	12.0151	10.3797	9.583	9.29805	8.80383	8.77002	8.51475
364	EGFNQGSDAES	11	571.218	1140.42	2	NaN	NaN	NaN	NaN	NaN	NaN	NaN	NaN	NaN	NaN	12.631	NaN	NaN	NaN	NaN	NaN	NaN	NaN	NaN	NaN	12.6545	12.8568	NaN	12.4604
365	AFLSLHS	7	387.71	773.407	2	11.9934	8.35828	11.7355	10.3389	8.824	8.39489	10.4219	10.0739	8.73163	10.9967	11.6692	11.3491	10.9267	12.3752	8.98806	10.5384	11.3898	11.5395	12.2487	10.6526	11.0003	10.7482	10.4366	11.1384
366	NDHGNLK	7	399.2	796.383	2	12.3491	NaN	12.9152	11.3501	NaN	NaN	11.5829	NaN	NaN	12.9524	11.2226	9.77256	NaN	10.6397	9.41442	10.7529	12.2487	12.4325	10.481	11.1277	9.85926	12.9153	13.0249	12.9029
367	VAVFDENC	8	477.204	952.396	2	NaN	7.02276	NaN	NaN	NaN	NaN	NaN	NaN	8.93576	NaN	NaN	NaN	NaN	NaN	9.72916	NaN	NaN	9.14983	NaN	NaN	9.52746	10.1184	8.77782	NaN
368	SYVQLGVLPR	10	566.328	1130.64	2	9.47338	NaN	NaN	8.98757	8.3182	8.84576	8.79533	10.011	NaN	10.082	NaN	NaN	9.98223	8.18058	8.83713	9.24674	9.56773	10.6444	7.27995	9.54543	NaN	8.90411	10.0709	10.5141
369	LTEDYGQDPAFT	12	678.8	1355.59	2	16.2972	12.9988	16.0276	14.9562	14.09	13.9857	15.5508	15.3321	13.5472	16.5643	16.3362	15.8282	13.6161	15.019	12.8608	15.2321	16.0234	16.5762	15.6007	15.5484	14.8465	NaN	15.9855	15.8133
370	DGQCLNDR	8	489.701	977.387	2	8.29481	NaN	10.8437	10.7413	9.63702	6.93319	11.0351	10.741	9.16133	8.3265	NaN	NaN	10.6817	NaN	10.6859	8.67476	9.56312	7.69464	8.22528	10.8689	9.53959	8.29078	10.8309	10.4218
371	TALDLPK	7	379.226	756.438	2	NaN	NaN	NaN	8.68059	8.58098	8.44306	7.9026	9.97715	NaN	NaN	NaN	NaN	NaN	NaN	NaN	7.43875	8.50634	9.35078	NaN	NaN	NaN	NaN	NaN	NaN
372	YGLFLPA	7	390.717	779.422	2	10.709	NaN	10.5114	11.7555	10.8984	9.15787	11.6504	11.7438	9.41266	11.4506	11.9	11.3977	9.07682	9.2364	NaN	11.1408	10.588	12.7209	10.8408	9.40897	9.63424	10.6526	11.5068	NaN
373	ASDNFPAGTL	10	497.229	992.445	2	10.9248	NaN	10.7713	11.1862	NaN	NaN	10.8834	NaN	NaN	10.2266	NaN	NaN	NaN	NaN	NaN	NaN	NaN	NaN	NaN	NaN	NaN	NaN	NaN	NaN
374	NTNFGLCHDVG	11	617.269	1232.52	2	14.1704	11.4555	14.6547	11.7642	9.84085	NaN	11.4006	10.9313	10.217	11.917	12.3345	12.1206	10.8991	10.5332	10.528	9.38113	9.94842	10.8241	12.1159	NaN	NaN	11.9632	11.5766	11.4997
375	SEVCFPR	7	447.711	893.406	2	9.86209	6.84152	9.1634	NaN	NaN	7.21653	8.24337	8.13251	NaN	8.63689	NaN	NaN	9.16825	9.66702	9.5685	7.77666	8.82235	9.44731	NaN	9.57092	9.4149	8.43742	NaN	NaN
376	TEAPADKDELNQLS	14	766.359	1530.7	2	NaN	NaN	17.7286	NaN	NaN	NaN	17.3823	NaN	NaN	18.8429	19.0037	18.1511	NaN	16.8735	NaN	NaN	NaN	18.0312	18.384	NaN	NaN	NaN	NaN	16.1125
377	DNLEVEDEEGS	11	618.249	1234.48	2	9.81634	NaN	10.2525	NaN	9.81348	10.4722	8.85937	NaN	NaN	10.1767	9.99571	10.2638	10.5558	10.0678	9.13706	NaN	10.1254	10.1501	10.0632	8.94152	10.1069	9.60539	11.1341	9.42426
378	DMSPLRPQ	8	472.238	942.459	2	11.6452	NaN	12.301	NaN	NaN	NaN	10.2515	NaN	8.81019	11.297	10.7435	NaN	NaN	NaN	NaN	NaN	NaN	NaN	NaN	10.7372	NaN	10.4085	NaN	10.551
379	LLTLMEHTLNHP	12	473.586	1417.74	3	NaN	NaN	NaN	10.9528	NaN	9.88257	11.7194	NaN	NaN	NaN	NaN	NaN	NaN	11.6893	NaN	NaN	11.1824	11.8168	NaN	NaN	NaN	NaN	NaN	11.9852
380	MDCGFHA	7	419.155	836.295	2	12.9707	10.261	13.1245	11.7025	10.6533	9.59675	11.4532	11.9209	10.1752	13.3872	12.9192	12.4014	11.0964	9.34554	10.0381	11.0531	11.8099	NaN	12.9741	11.7162	11.9757	11.3514	11.8403	11.546
381	LSVGSLTNTNFGLCHDVG	18	945.952	1889.89	2	15.3671	NaN	14.4451	NaN	13.9622	NaN	NaN	15.7528	12.5486	13.8836	NaN	NaN	NaN	NaN	NaN	NaN	NaN	NaN	13.1892	NaN	NaN	NaN	15.321	16.3514
382	DNVEGFNCER	10	620.257	1238.5	2	8.62105	NaN	NaN	NaN	NaN	NaN	9.26604	NaN	NaN	NaN	NaN	NaN	NaN	9.71194	9.28792	NaN	NaN	NaN	NaN	8.36117	NaN	NaN	8.67618	8.57421
383	YTYGPQTTLYPAAGGSDDWAYDQGLK	26	946.768	2837.28	3	NaN	NaN	NaN	NaN	NaN	NaN	NaN	NaN	NaN	NaN	NaN	NaN	11.4591	NaN	NaN	12.035	12.4256	NaN	NaN	NaN	NaN	12.8556	13.1425	NaN
384	TTTCEGDK	8	456.193	910.37	2	9.6541	6.91871	9.49185	10.3502	8.84443	8.96565	10.123	NaN	8.58196	10.3908	NaN	9.92512	NaN	9.24871	9.34678	8.59406	9.19695	9.77009	10.3491	9.73658	10.0341	9.86509	9.72917	9.42229
385	VDHATCSQ	8	459.194	916.371	2	12.0613	NaN	11.1337	11.6382	10.5166	9.65907	11.2503	11.9402	10.0724	13.4859	13.0321	13.4152	12.0949	10.3321	10.8239	9.86251	NaN	11.0698	11.4156	9.81159	10.2922	11.4961	10.8324	12.295
386	TSAFLDWLEE	10	605.785	1209.56	2	7.937	NaN	NaN	NaN	NaN	NaN	NaN	NaN	NaN	8.45182	8.73648	8.96484	NaN	NaN	NaN	NaN	NaN	NaN	NaN	NaN	NaN	NaN	NaN	8.24549
387	WNWWGSTV	8	518.729	1035.45	2	NaN	NaN	NaN	NaN	NaN	9.76804	NaN	NaN	NaN	NaN	NaN	NaN	11.5254	7.37776	9.40168	NaN	10.2129	NaN	NaN	9.11229	NaN	11.393	NaN	NaN
388	TASGGLESYNDPY	13	687.295	1372.58	2	15.6243	NaN	NaN	16.1177	14.8097	14.3269	15.5015	16.3994	14.0736	16.1415	15.3425	15.1309	14.5935	NaN	10.8172	NaN	NaN	NaN	12.9149	NaN	NaN	16.2189	16.0308	16.2987
389	YGFLLPESQ	9	527.266	1052.52	2	11.2019	NaN	11.3336	9.27336	NaN	NaN	8.65316	9.05689	7.74718	11.0991	11.1124	12.0098	8.0923	8.50184	8.06353	10.5074	11.1337	11.8842	11.3053	9.87297	10.6523	8.35965	NaN	9.02302
390	LLHLPL	6	353.235	704.458	2	8.49287	NaN	8.55991	8.66826	7.52311	NaN	7.75296	8.2772	NaN	8.52015	8.05824	7.37144	7.05279	6.83219	6.98988	7.75107	8.32315	9.08149	8.73082	8.33972	7.92695	7.99814	8.8108	8.40957
391	ENFEHV	6	387.674	773.334	2	8.44484	NaN	8.16558	6.81673	NaN	NaN	6.74534	NaN	NaN	7.36888	NaN	NaN	7.93707	9.22009	9.07772	NaN	NaN	NaN	NaN	7.61931	8.06193	NaN	NaN	NaN
392	YSSCSNTELT	10	581.241	1160.47	2	11.4254	9.0784	NaN	12.3552	NaN	NaN	NaN	NaN	NaN	NaN	NaN	12.9373	NaN	NaN	NaN	NaN	NaN	NaN	NaN	10.7581	12.1836	12.9943	NaN	11.6329
393	AEHCFDPC	8	518.186	1034.36	2	11.9964	NaN	12.0721	12.4924	NaN	NaN	12.5653	NaN	11.4007	12.3919	12.4436	12.1222	NaN	12.6365	11.8528	NaN	NaN	11.1832	12.8859	12.1065	12.8903	12.7705	11.6743	10.5491
394	QSLLPTAQETWL	12	693.866	1385.72	2	13.2658	9.38881	13.4671	NaN	NaN	NaN	12.5039	12.8421	10.1156	13.8387	13.7746	13.1935	10.2983	10.0567	NaN	NaN	NaN	13.7234	13.0104	12.2984	12.0029	12.7589	13.3166	13.1992
395	QSPNGFAFTHSEN	13	718.807	1435.6	2	NaN	NaN	NaN	NaN	11.0489	10.9489	12.341	NaN	9.75753	NaN	NaN	NaN	11.8414	14.2086	NaN	NaN	11.0883	NaN	NaN	NaN	NaN	NaN	12.9755	NaN
396	PYNKEH	6	394.191	786.366	2	NaN	NaN	NaN	6.71176	NaN	NaN	7.44359	NaN	NaN	NaN	9.25845	9.65356	NaN	7.10093	NaN	NaN	NaN	NaN	9.4654	NaN	7.9889	NaN	NaN	NaN
397	ESNEGFEQ	8	470.189	938.362	2	9.20394	NaN	NaN	NaN	8.67961	8.69866	9.08291	NaN	NaN	NaN	NaN	8.58456	NaN	NaN	NaN	7.32452	8.22409	NaN	NaN	NaN	NaN	9.33425	8.94573	NaN
398	CLNDYVEK	8	520.739	1039.46	2	10.5834	NaN	10.0908	NaN	10.0297	9.58034	NaN	NaN	NaN	10.689	NaN	NaN	9.09816	NaN	NaN	9.48276	9.83115	10.6343	NaN	9.8985	NaN	NaN	10.8125	10.7437
399	FLVDNPYTN	9	541.761	1081.51	2	11.6876	9.24762	11.4377	13.6225	12.4294	11.7195	12.8038	13.2027	11.4492	12.9113	11.9529	11.3109	12.2481	10.8202	NaN	11.2201	NaN	12.239	11.4811	10.9214	10.4695	12.2382	12.8355	13.0186
400	YPCN	4	553.211	552.2	1	NaN	NaN	NaN	NaN	NaN	NaN	10.2279	NaN	7.16469	NaN	NaN	6.85481	NaN	NaN	NaN	NaN	NaN	NaN	9.44896	NaN	NaN	9.58293	6.9833	NaN
401	QLLLYPYG	8	483.769	965.522	2	NaN	NaN	NaN	9.34179	NaN	NaN	NaN	NaN	NaN	NaN	11.0765	11.3159	NaN	8.66103	NaN	11.7704	12.6381	13.016	8.94524	NaN	NaN	9.54686	9.28121	10.1937
402	KLAEPVEL	8	449.765	897.517	2	13.0675	8.87972	12.1806	12.467	10.9774	10.4864	12.8568	12.6339	NaN	13.5334	13.5915	12.6788	12.8185	NaN	NaN	10.7185	11.9747	12.0329	11.3184	NaN	9.4068	11.7965	NaN	12.6089
403	QGWWDDGSNQ	10	596.736	1191.46	2	NaN	NaN	NaN	NaN	9.57501	NaN	NaN	10.5432	NaN	NaN	NaN	NaN	NaN	NaN	NaN	NaN	NaN	NaN	NaN	NaN	NaN	8.62	NaN	10.9798
404	CSCSPGWLGDGLK	13	718.818	1435.62	2	12.3597	8.95593	12.3626	11.966	10.7379	10.4797	12.3291	12.0833	10.1194	11.8287	NaN	NaN	12.3037	12.2459	12.0771	10.2185	10.9999	11.6708	NaN	12.2146	NaN	11.401	11.9187	11.2896
405	NNLEVEDEEGSL	12	674.299	1346.58	2	11.4835	NaN	11.3861	12.4925	11.2026	11.2035	11.1668	11.9733	11.2808	NaN	NaN	NaN	14.5937	13.6333	15.2561	10.0178	11.1203	11.1317	11.0932	12.7112	14.1157	NaN	NaN	NaN
406	ARENSQCSA	9	512.213	1022.41	2	11.2003	NaN	11.4869	10.5218	NaN	NaN	11.5987	10.6657	9.70757	12.0305	11.7011	11.7102	NaN	10.0519	9.90325	9.97541	10.829	11.0406	12.5085	11.6434	11.9702	10.7209	10.3853	NaN
407	YSSCSNTELTCNS	13	761.793	1521.57	2	14.5587	11.6211	14.2652	15.1908	12.1325	11.2613	14.7615	13.5117	13.3918	15.2127	14.8884	14.8228	13.2425	13.9741	14.1259	11.8489	12.2848	12.9899	14.9683	13.7176	14.4118	NaN	14.0216	13.3057
408	LVTNPDGFAFTH	12	659.824	1317.64	2	11.3787	NaN	NaN	NaN	NaN	NaN	NaN	NaN	NaN	NaN	NaN	NaN	NaN	NaN	NaN	10.5741	11.7101	12.5834	NaN	NaN	NaN	NaN	NaN	NaN
409	NNLEVEDEEGSLVV	14	773.367	1544.72	2	NaN	NaN	NaN	12.6097	NaN	NaN	12.2505	12.5958	NaN	12.7715	13.327	NaN	12.5169	NaN	NaN	NaN	NaN	NaN	12.1091	NaN	NaN	NaN	NaN	NaN
410	TLMEHTLNHP	10	403.529	1207.57	3	NaN	NaN	NaN	9.5792	NaN	NaN	NaN	NaN	8.24769	11.248	11.9605	11.3591	NaN	NaN	8.25653	9.30404	NaN	10.2343	9.98711	NaN	9.58996	NaN	10.5942	10.6513
411	NPSRPWWE	8	536.254	1070.49	2	NaN	7.29598	NaN	12.1172	8.84882	NaN	NaN	10.0935	10.8382	10.4095	10.8934	10.867	NaN	10.8754	NaN	8.56161	9.81222	NaN	11.6518	11.1397	11.4724	11.9854	10.8794	10.2081
412	AAGNSCTGLK	10	489.738	977.46	2	NaN	NaN	NaN	NaN	NaN	NaN	NaN	NaN	NaN	NaN	NaN	NaN	8.85481	NaN	6.78494	NaN	NaN	NaN	NaN	NaN	NaN	NaN	NaN	NaN
413	YGYESH	6	378.154	754.292	2	NaN	NaN	NaN	NaN	NaN	NaN	4.3688	NaN	NaN	8.0819	7.95451	7.74904	NaN	NaN	NaN	NaN	NaN	NaN	6.85865	NaN	NaN	NaN	NaN	6.4196
414	TEAPADKDELN	11	602.273	1202.53	2	11.8471	NaN	NaN	NaN	NaN	NaN	NaN	NaN	9.52369	14.54	NaN	NaN	NaN	11.0437	NaN	NaN	NaN	NaN	12.2451	NaN	11.3133	12.5977	NaN	NaN
415	CCETHDNCY	9	629.702	1257.38	2	8.75864	NaN	7.75823	11.5188	12.7335	12.7226	10.4066	11.3904	NaN	NaN	NaN	NaN	8.70027	NaN	NaN	8.00405	7.45205	9.62004	NaN	NaN	NaN	NaN	9.35527	NaN
416	EGYDQASDAEDL	12	656.762	1311.51	2	14.5574	11.1491	NaN	NaN	NaN	NaN	11.6112	11.6109	NaN	NaN	13.6637	13.8833	NaN	NaN	NaN	9.64225	10.8297	NaN	NaN	12.8374	13.6967	13.3521	NaN	12.7821
417	STNAGTTCLGTDPN	14	704.804	1407.59	2	16.7679	13.8432	16.4176	14.8085	12.9371	12.5127	14.9594	14.9492	13.2822	17.5805	16.9529	16.6106	14.8973	13.5673	12.3369	14.4156	14.926	15.6469	16.6526	15.8077	15.4318	14.8729	14.327	14.4785
418	YGFLLPESQLQ	11	647.836	1293.66	2	14.0607	11.0392	14.7145	NaN	7.88739	7.28243	8.87684	9.7118	8.07072	11.8725	11.6073	NaN	8.79398	9.00557	NaN	10.0544	10.8234	11.5866	12.1058	10.371	11.085	NaN	9.61252	10.5721
419	LAVLTQTPL	9	478.294	954.575	2	NaN	NaN	NaN	NaN	NaN	NaN	NaN	7.62734	NaN	NaN	7.1534	6.94679	NaN	NaN	NaN	NaN	NaN	NaN	NaN	NaN	NaN	6.88007	NaN	7.8112
420	DGVWTLVGLV	10	529.798	1057.58	2	6.18476	NaN	NaN	8.0832	6.93013	7.51022	6.01515	7.69973	NaN	NaN	NaN	NaN	8.66957	NaN	6.05789	NaN	NaN	NaN	NaN	NaN	NaN	NaN	NaN	6.95755
421	LKAEPVEL	8	449.765	897.517	2	NaN	NaN	NaN	12.467	NaN	NaN	NaN	12.6339	9.91254	13.5334	NaN	NaN	NaN	NaN	NaN	NaN	11.9747	NaN	NaN	NaN	NaN	NaN	NaN	NaN
422	TGLPGGTYCDVLSGDK	16	820.383	1638.76	2	NaN	7.94208	11.6047	12.4634	NaN	NaN	NaN	NaN	NaN	NaN	NaN	NaN	NaN	12.3551	12.7512	11.7199	12.2561	NaN	NaN	10.52	NaN	NaN	NaN	11.3913
423	LWTDGPLAAEL	11	593.311	1184.61	2	11.1411	NaN	11.2615	NaN	NaN	NaN	NaN	NaN	NaN	NaN	10.4022	10.5357	NaN	NaN	NaN	8.88274	9.40187	NaN	NaN	NaN	NaN	9.08614	NaN	NaN
424	LSVNFVNDHGNL	12	665.325	1328.64	2	NaN	NaN	NaN	NaN	NaN	NaN	NaN	11.3554	NaN	15.3697	NaN	NaN	10.2788	NaN	12.9628	12.778	NaN	14.1109	10.5841	13.6151	NaN	16.3036	NaN	NaN
425	NDNWQLS	7	439.188	876.361	2	NaN	NaN	NaN	10.4494	NaN	NaN	NaN	10.6498	NaN	10.7035	NaN	NaN	10.8369	8.18057	9.47682	NaN	NaN	NaN	NaN	NaN	NaN	NaN	NaN	NaN
426	LTSVALPSACAPAGTL	16	764.904	1527.8	2	NaN	NaN	NaN	NaN	8.16219	NaN	9.50513	10.2023	NaN	NaN	NaN	NaN	11.9017	NaN	NaN	NaN	NaN	NaN	NaN	NaN	NaN	NaN	NaN	NaN
427	EFPAVPY	7	411.705	821.396	2	10.5049	NaN	9.79247	12.6475	12.4498	11.7526	11.2414	14.32	NaN	13.57	NaN	9.30936	11.8507	8.80741	9.2479	11.1171	10.9071	11.9523	8.95383	9.654	9.30558	11.3893	13.0498	13.7667
428	VNWL	4	531.291	530.285	1	12.5486	NaN	14.2121	11.5554	10.4676	NaN	12.1125	12.7726	10.5916	11.8443	11.7542	11.3634	10.9445	11.7268	10.3312	10.3539	NaN	11.7437	13.3337	12.9066	12.7377	11.4945	11.6968	12.3368
429	TEAPADKDELDQLK	14	524.931	1571.77	3	NaN	7.96939	11.0135	NaN	NaN	NaN	9.32385	NaN	8.3206	11.9317	NaN	NaN	NaN	10.2951	NaN	NaN	NaN	NaN	NaN	NaN	NaN	10.0334	NaN	NaN
430	EGFDQGSDAES	11	571.218	1140.42	2	NaN	9.41066	NaN	NaN	10.364	NaN	11.3961	NaN	10.6512	12.4354	NaN	13.5204	12.4053	NaN	12.8704	NaN	10.0423	NaN	12.1488	10.9722	NaN	NaN	11.5693	NaN
431	YCTDPTTA	8	464.689	927.364	2	12.4666	NaN	NaN	NaN	NaN	NaN	NaN	NaN	NaN	NaN	NaN	NaN	11.849	NaN	NaN	NaN	12.1503	12.4978	NaN	NaN	NaN	12.232	NaN	NaN
432	SNCCQH	6	403.141	804.264	2	7.19547	NaN	5.9499	NaN	NaN	NaN	NaN	NaN	NaN	5.34329	NaN	8.0082	NaN	5.95044	6.3698	NaN	NaN	NaN	NaN	NaN	NaN	NaN	NaN	NaN
433	EGFYGLTAEDPFGC	14	781.827	1561.64	2	8.57733	NaN	NaN	9.73001	NaN	NaN	9.01495	NaN	NaN	9.94044	9.39567	8.92172	8.04933	NaN	8.91521	NaN	NaN	NaN	NaN	NaN	NaN	9.16246	8.67397	8.45985
434	VFLEAH	6	358.192	714.37	2	8.12893	NaN	8.09184	NaN	NaN	NaN	NaN	NaN	NaN	7.92488	6.70339	NaN	NaN	NaN	NaN	NaN	NaN	7.1062	6.70992	7.242	NaN	NaN	NaN	NaN
435	NCGFHA	6	353.634	705.254	2	11.2131	8.63373	11.634	10.1592	NaN	NaN	10.0013	10.4825	8.85007	11.9167	11.3072	10.6177	9.54127	NaN	8.32187	NaN	NaN	11.153	11.6772	10.5811	10.7516	10.0305	10.5207	10.0853
436	VDGQYAVHGVT	11	573.282	1144.55	2	11.7858	8.39942	12.0296	NaN	NaN	NaN	NaN	NaN	NaN	NaN	10.8285	NaN	NaN	NaN	NaN	NaN	NaN	NaN	NaN	NaN	NaN	NaN	NaN	NaN
437	SSYWGSTV	8	443.701	885.387	2	8.40893	NaN	NaN	7.21442	NaN	NaN	7.17332	8.10589	NaN	9.13797	NaN	NaN	6.37394	NaN	NaN	6.9684	NaN	8.63147	NaN	NaN	NaN	NaN	7.61841	8.61889
438	EHTLNHP	7	424.208	846.398	2	9.66997	NaN	9.47091	NaN	NaN	NaN	NaN	NaN	NaN	NaN	8.52038	8.41328	NaN	NaN	NaN	NaN	7.79602	8.60816	8.17003	NaN	NaN	7.67065	7.83689	7.40738
439	VSVT	4	405.234	404.227	1	10.7977	NaN	11.4198	10.35	NaN	NaN	NaN	10.2818	NaN	11.5536	13.0405	12.4119	NaN	9.87446	9.2696	9.97364	11.1608	11.6641	14.147	NaN	12.649	11.6393	11.4507	11.2463
440	LFQEVLDLGGEALQS	15	809.918	1617.82	2	NaN	NaN	NaN	11.8086	9.14408	10.5313	NaN	12.0383	NaN	11.9392	NaN	9.98322	11.3259	NaN	NaN	NaN	NaN	NaN	NaN	NaN	NaN	NaN	NaN	11.7063
441	LWTNGPLAAEL	11	592.818	1183.62	2	12.0869	8.25077	12.1198	NaN	7.30721	NaN	NaN	NaN	NaN	NaN	10.7949	NaN	NaN	NaN	NaN	NaN	NaN	NaN	9.82257	NaN	NaN	NaN	NaN	9.38363
442	KEDLPR	6	379.213	756.413	2	NaN	NaN	NaN	6.24303	NaN	NaN	NaN	NaN	NaN	6.68532	NaN	NaN	NaN	NaN	NaN	NaN	6.41325	7.19697	NaN	7.10358	NaN	NaN	NaN	6.76056
443	LLPTAQET	8	436.74	871.465	2	10.9013	8.48685	11.6041	6.87788	NaN	NaN	NaN	NaN	NaN	8.25767	8.99825	9.93882	NaN	7.78615	NaN	9.61406	10.5175	10.9234	8.61528	7.56454	7.12678	NaN	NaN	NaN
444	CDKDLHG	7	422.686	843.354	2	8.27069	NaN	8.65796	NaN	NaN	NaN	7.78056	7.54545	6.96898	9.2341	9.57868	9.58027	6.62877	NaN	NaN	NaN	7.83896	8.26329	9.80703	NaN	8.50814	8.45008	8.33634	8.27791
445	LDLVAEHPQ	9	511.269	1020.52	2	12.7234	NaN	NaN	12.2984	NaN	NaN	NaN	NaN	NaN	NaN	13.5251	NaN	12.36	NaN	NaN	NaN	NaN	11.6142	NaN	NaN	NaN	12.3449	11.7802	12.0987
446	TNLLPTAQET	10	544.284	1086.56	2	NaN	10.689	13.9653	NaN	12.0034	10.9748	NaN	NaN	12.7971	14.5709	NaN	15.1442	11.5794	NaN	10.6433	12.4213	13.4669	13.8566	NaN	NaN	12.7134	14.3395	14.3203	NaN
447	MSLCAGASGV	10	484.713	967.41	2	NaN	NaN	NaN	11.0505	NaN	NaN	10.0078	10.6939	NaN	10.0193	NaN	10.782	NaN	NaN	8.87933	NaN	NaN	NaN	NaN	NaN	NaN	11.1335	10.4535	NaN
448	SAMADFNDGK	10	528.226	1054.44	2	NaN	NaN	NaN	NaN	NaN	NaN	9.78027	12.5013	NaN	NaN	NaN	NaN	NaN	NaN	NaN	NaN	NaN	NaN	NaN	NaN	NaN	11.717	11.5548	NaN
449	LLPDDGR	7	393.212	784.408	2	11.6864	8.5173	11.4731	9.50847	11.4061	11.1134	10.7407	12.9236	7.43751	12.1922	NaN	NaN	11.3953	NaN	NaN	10.7731	11.5348	12.3716	NaN	11.5925	NaN	9.32346	12.7219	12.7702
450	KNNLEVEDQEGS	12	681.804	1361.59	2	10.9682	NaN	11.0784	10.3459	NaN	NaN	9.88564	NaN	9.09103	11.6262	11.66	12.1695	NaN	NaN	NaN	NaN	NaN	9.50478	NaN	NaN	10.3617	NaN	10.4094	11.062
451	VALFGDK	7	375.212	748.412	2	NaN	NaN	NaN	8.8838	7.91678	NaN	NaN	8.1133	NaN	NaN	NaN	NaN	8.76594	7.13048	7.62821	NaN	7.71315	8.81041	NaN	NaN	NaN	NaN	8.94156	8.79856
452	PDMVCAGGDLR	11	595.768	1189.52	2	11.4944	NaN	10.7921	10.4627	NaN	11.0497	NaN	NaN	NaN	12.535	NaN	NaN	NaN	NaN	NaN	9.82316	NaN	10.9099	NaN	NaN	NaN	NaN	NaN	NaN
453	SEEEVDLH	8	479.211	956.409	2	NaN	NaN	7.68286	7.65438	NaN	NaN	7.9559	NaN	7.4001	8.44624	8.16743	NaN	NaN	NaN	NaN	NaN	NaN	NaN	9.1893	NaN	8.60101	NaN	NaN	NaN
454	HVGSKDEGDM	10	537.73	1073.44	2	8.72593	NaN	8.18307	NaN	NaN	NaN	NaN	NaN	NaN	NaN	NaN	9.94141	NaN	NaN	NaN	NaN	NaN	NaN	10.0033	8.26809	9.1572	NaN	NaN	NaN
455	FEPAVPY	7	411.705	821.396	2	10.5049	NaN	NaN	12.6475	12.4498	NaN	11.2414	14.32	10.1173	13.57	10.7324	NaN	11.8507	NaN	9.2479	11.1171	10.9071	11.9523	NaN	9.654	9.30558	11.3893	13.0498	13.7667
456	LLNLSGK	7	372.734	743.454	2	NaN	NaN	NaN	NaN	8.94083	8.56424	NaN	10.4935	NaN	9.12136	NaN	NaN	NaN	NaN	NaN	6.546	NaN	NaN	NaN	NaN	NaN	NaN	NaN	NaN
457	GYESHMT	7	412.666	823.317	2	7.76594	NaN	8.21048	6.76337	NaN	NaN	NaN	NaN	6.43889	8.39587	8.6964	8.43043	NaN	NaN	NaN	NaN	NaN	NaN	9.2661	NaN	8.11183	7.59615	7.3831	NaN
458	FSTGGDNRAP	10	511.239	1020.46	2	9.85996	NaN	10.4625	9.55662	8.19429	7.70606	9.92149	9.90207	NaN	10.737	11.3423	11.2513	NaN	NaN	NaN	8.88338	9.90487	10.5282	10.9051	10.3014	10.3958	10.2848	10.1684	10.6506
459	FFVVSSET	8	458.227	914.438	2	7.67575	NaN	NaN	NaN	NaN	NaN	NaN	NaN	NaN	8.25553	7.32236	NaN	7.81482	NaN	NaN	NaN	7.14396	NaN	7.85932	NaN	NaN	NaN	NaN	NaN
460	DTMVCAGGDGVLSAC	15	756.809	1511.61	2	13.8556	9.69187	14.5674	13.1164	11.407	11.5212	12.0967	12.4263	NaN	NaN	NaN	NaN	13.3567	12.2369	NaN	NaN	NaN	NaN	13.3418	NaN	13.3789	13.0733	12.8378	13.0505
461	VASGQLK	7	351.711	701.407	2	NaN	NaN	6.46523	7.79889	7.17982	6.60376	6.36401	7.42248	NaN	7.63398	NaN	NaN	7.55883	NaN	NaN	NaN	7.23238	8.27702	6.10501	7.86537	NaN	7.46202	8.73074	8.55396
462	SNCCQHDTLLS	11	667.776	1333.54	2	15.9951	NaN	15.5685	NaN	NaN	NaN	NaN	NaN	NaN	NaN	NaN	NaN	NaN	NaN	NaN	NaN	NaN	NaN	NaN	NaN	NaN	NaN	16.0541	15.314
463	STNAGTTCL	9	462.708	923.402	2	NaN	7.90985	NaN	NaN	NaN	NaN	9.44447	NaN	8.65989	11.3402	11.748	11.4165	NaN	NaN	NaN	7.60288	8.71706	NaN	11.6968	9.77121	NaN	NaN	NaN	NaN
464	LLDL	4	473.295	472.29	1	NaN	NaN	NaN	12.6972	10.9919	NaN	NaN	12.8281	NaN	12.2235	11.9542	11.4985	NaN	NaN	9.43277	NaN	NaN	NaN	NaN	NaN	NaN	NaN	12.2145	12.463
465	VCLPSASDNFPAGT	14	718.822	1435.63	2	NaN	11.9971	NaN	NaN	NaN	NaN	NaN	NaN	NaN	14.9691	NaN	15.8523	13.9154	14.3064	13.5466	NaN	NaN	NaN	15.3578	13.7148	15.0878	14.5907	NaN	14.2002
466	SLVGSLTNTNFGLCHDVG	18	630.971	1889.89	3	NaN	NaN	NaN	16.2729	NaN	15.8542	13.7973	NaN	NaN	NaN	NaN	NaN	15.6608	NaN	13.2375	NaN	NaN	NaN	NaN	11.734	14.1123	NaN	15.321	NaN
467	STENAELAQN	10	539.239	1076.46	2	10.4713	NaN	NaN	NaN	NaN	NaN	10.2498	10.1366	NaN	11.44	NaN	NaN	NaN	NaN	NaN	NaN	NaN	NaN	NaN	NaN	NaN	NaN	NaN	NaN
468	WNDAGFGGAGASSNPCSETYHG	22	747.968	2240.88	3	NaN	NaN	NaN	14.211	NaN	12.482	NaN	13.7697	NaN	NaN	NaN	NaN	NaN	NaN	NaN	NaN	NaN	13.5501	NaN	NaN	NaN	NaN	NaN	NaN
469	FTALLDNL	8	453.75	905.486	2	7.73277	NaN	NaN	8.13783	NaN	NaN	7.92714	7.71366	NaN	9.2933	9.27829	10.6655	NaN	NaN	NaN	6.69875	7.19947	7.76269	7.84909	NaN	NaN	8.1424	8.07772	NaN
470	LSLGNLGLT	9	444.263	886.512	2	7.88179	NaN	7.57967	NaN	NaN	NaN	NaN	8.48791	NaN	8.10745	NaN	NaN	NaN	NaN	NaN	NaN	NaN	NaN	NaN	NaN	NaN	NaN	8.47256	8.16186
471	LATVSLPR	8	428.765	855.518	2	14.2878	11.2204	13.9109	11.0367	9.77641	NaN	14.1323	14.3337	NaN	14.3822	12.5406	11.8432	14.0409	14.4913	14.1301	12.8189	13.279	14.2269	12.7238	14.182	13.4367	10.7362	10.8788	10.7302
472	LDLVAEHPQLVS	12	660.86	1319.71	2	15.3734	12.0847	15.5437	13.6946	NaN	11.2856	14.4862	13.6268	12.7359	15.7974	15.4511	14.7081	11.6057	NaN	10.4501	14.2666	15.137	15.6814	14.9684	14.5318	13.8642	15.035	14.8055	14.4171
473	FQYGSLLTT	9	515.266	1028.52	2	13.3283	NaN	13.7681	11.2784	NaN	NaN	NaN	12.5513	10.0513	12.4576	12.9489	NaN	NaN	NaN	NaN	NaN	13.7131	14.2245	NaN	NaN	10.3157	NaN	12.219	12.4523
474	TASGGLESYNDPYQ	14	751.325	1500.64	2	NaN	7.88735	NaN	12.5708	NaN	NaN	12.1121	12.5132	10.9865	13.4834	13.8666	NaN	12.3972	NaN	NaN	NaN	NaN	NaN	NaN	NaN	NaN	13.2199	NaN	13.483
475	ELLEGLK	7	401.239	800.464	2	8.02961	NaN	7.77746	NaN	9.01928	9.05075	8.33815	9.3348	NaN	8.51926	NaN	NaN	9.48467	NaN	8.39358	7.11908	7.36492	8.60958	NaN	8.06697	NaN	NaN	10.0637	10.687
476	LFQEVLDLNEAL	12	702.373	1402.73	2	NaN	NaN	NaN	9.25904	NaN	NaN	NaN	7.30381	NaN	NaN	NaN	NaN	NaN	NaN	NaN	NaN	NaN	NaN	NaN	NaN	NaN	7.98995	NaN	7.54373
477	TCLPGSDPLLDFN	13	724.839	1447.67	2	13.0803	NaN	NaN	NaN	NaN	11.1745	13.6756	NaN	12.6186	13.8106	14.0165	13.3468	NaN	NaN	NaN	12.2616	12.4335	13.383	14.5372	NaN	13.5388	13.966	13.6348	13.0169
478	NLESSNPR	8	458.73	915.441	2	NaN	NaN	8.01989	NaN	NaN	NaN	NaN	8.34058	NaN	NaN	NaN	NaN	7.93172	7.9925	7.99353	NaN	NaN	NaN	NaN	NaN	NaN	7.72922	NaN	NaN
479	ESLLQSPPAW	10	564.289	1126.57	2	7.80818	NaN	NaN	NaN	NaN	NaN	NaN	NaN	NaN	9.2817	NaN	NaN	7.71307	NaN	NaN	NaN	7.91688	8.86552	NaN	9.26848	NaN	NaN	NaN	NaN
480	TASNLESY	8	442.704	883.392	2	10.3014	7.56478	NaN	NaN	NaN	NaN	NaN	NaN	8.60372	10.4721	NaN	NaN	NaN	NaN	NaN	7.51456	NaN	NaN	NaN	NaN	NaN	NaN	10.032	10.0518
481	QCLDAPLLSQ	10	572.786	1143.56	2	13.1047	10.316	12.697	NaN	11.261	NaN	12.5371	12.7123	11.1605	13.803	12.78	12.8804	NaN	NaN	11.1003	10.1244	NaN	10.7295	12.4147	12.1698	13.0496	12.818	12.0574	NaN
482	SSNSMVCAGGDGV	13	620.75	1239.49	2	NaN	7.47953	10.9289	NaN	NaN	NaN	NaN	NaN	NaN	NaN	NaN	NaN	NaN	NaN	NaN	NaN	NaN	NaN	NaN	NaN	NaN	NaN	NaN	NaN
483	LQAGALLPVVDYQ	13	693.884	1385.76	2	14.042	9.73358	13.4106	NaN	10.9511	10.8317	12.2014	12.2883	NaN	NaN	12.8198	NaN	12.6682	8.02861	10.3849	10.152	11.1194	11.3746	11.1702	10.6419	NaN	NaN	11.8926	NaN
484	NYLFGCEL	8	508.231	1014.45	2	9.53965	NaN	8.82823	9.22183	NaN	NaN	9.22978	NaN	NaN	NaN	9.76275	9.54208	8.20794	NaN	NaN	NaN	NaN	NaN	NaN	8.34219	NaN	9.21514	8.6199	9.3492
485	LALDNLNLF	9	517.282	1032.55	2	11.0606	NaN	11.6945	11.3466	9.7237	NaN	NaN	11.0392	9.52407	11.4612	11.4351	10.8267	9.98123	NaN	NaN	10.1165	10.6412	10.8592	11.324	9.37538	11.1592	11.1774	10.982	11.329
486	GVDSLFVHE	9	501.748	1001.48	2	NaN	NaN	NaN	9.38558	NaN	NaN	9.49312	NaN	NaN	NaN	11.3628	10.4017	NaN	NaN	NaN	NaN	NaN	NaN	9.41566	NaN	NaN	NaN	NaN	NaN
487	SMLADYLN	8	471.715	941.416	2	11.717	NaN	NaN	14.6011	NaN	11.5439	13.3334	13.2662	11.1821	14.3549	13.7591	13.0407	11.8203	NaN	NaN	12.5991	12.3442	13.7387	11.8096	NaN	NaN	13.8753	14.0375	13.6523
488	VVGGEDARPN	10	507.254	1012.49	2	NaN	NaN	8.41816	7.68003	NaN	NaN	NaN	NaN	NaN	8.5881	8.41261	8.64446	7.24643	7.73917	NaN	NaN	NaN	NaN	NaN	NaN	8.21992	8.24258	7.58141	NaN
489	TSFV	4	453.233	452.227	1	11.541	8.13738	11.5454	11.2118	NaN	NaN	NaN	12.3882	NaN	12.797	12.4514	11.1037	NaN	NaN	NaN	NaN	NaN	NaN	NaN	NaN	NaN	NaN	11.5483	13.0174
490	TASGGLESY	9	442.704	883.392	2	NaN	7.56478	NaN	10.5147	9.89371	NaN	NaN	10.8741	NaN	NaN	8.29637	7.86365	NaN	NaN	NaN	NaN	6.88775	NaN	NaN	NaN	NaN	NaN	NaN	NaN
491	MEHTLNHPY	9	381.175	1140.5	3	10.0265	NaN	NaN	10.1615	NaN	NaN	10.5598	10.4682	NaN	10.2327	NaN	NaN	7.77022	NaN	NaN	NaN	NaN	11.2878	9.03475	NaN	8.96178	10.9435	11.0807	10.2754
492	DSSPCER	7	425.672	849.329	2	6.41663	NaN	NaN	5.83729	NaN	NaN	NaN	NaN	NaN	6.52277	NaN	NaN	5.85784	6.41931	NaN	NaN	NaN	NaN	NaN	NaN	NaN	6.30023	NaN	NaN
493	VGKPGPNKPAL	11	359.886	1076.63	3	11.9644	NaN	12.6669	10.2139	8.76304	NaN	NaN	11.1115	NaN	12.9549	13.2154	13.4056	9.58956	NaN	7.92975	10.386	11.2927	11.9972	13.1102	NaN	11.5526	11.1276	11.3422	11.6014
494	YGFLLPESQLQAT	13	733.879	1465.75	2	15.2064	NaN	15.2914	NaN	NaN	NaN	13.1967	14.263	NaN	16.1318	16.1789	15.853	NaN	NaN	NaN	NaN	NaN	14.001	NaN	13.6616	14.8203	NaN	13.9538	NaN
495	SLGLLCDK	8	453.242	904.469	2	9.44096	NaN	NaN	9.74073	8.32148	8.48184	9.68611	9.24657	7.47845	9.54851	NaN	NaN	8.85235	9.12441	8.90608	NaN	NaN	NaN	9.0431	9.02035	8.90778	NaN	9.04279	8.91007
496	DPMVCAGGDLR	11	603.766	1205.52	2	NaN	NaN	NaN	NaN	NaN	8.72734	NaN	NaN	NaN	NaN	NaN	NaN	NaN	NaN	NaN	NaN	NaN	NaN	NaN	NaN	NaN	NaN	8.54914	10.0007
497	NSTELTCNS	9	513.214	1024.41	2	NaN	NaN	NaN	7.85943	NaN	NaN	NaN	NaN	NaN	NaN	7.9125	7.63768	NaN	NaN	NaN	NaN	NaN	NaN	7.23277	NaN	NaN	NaN	NaN	NaN
498	CDGDSGGPLNC	11	576.208	1150.4	2	NaN	NaN	NaN	11.223	NaN	NaN	10.8392	NaN	NaN	12.7675	NaN	14.531	11.4157	NaN	NaN	9.14864	NaN	NaN	NaN	9.60934	12.2873	NaN	10.6698	NaN
499	VNCGFPGLT	9	482.731	963.448	2	8.63018	NaN	NaN	10.8077	NaN	NaN	10.6194	9.85588	9.57897	NaN	NaN	10.2559	NaN	NaN	NaN	NaN	NaN	NaN	9.22085	NaN	NaN	11.1916	10.2599	9.97267
500	NSFFPR	6	384.195	766.376	2	NaN	NaN	8.21233	NaN	NaN	NaN	6.43176	7.64164	NaN	7.50039	NaN	NaN	NaN	NaN	NaN	NaN	6.64439	7.19037	NaN	8.02949	NaN	NaN	7.81966	7.48934
501	NRPGVYT	7	403.713	805.408	2	NaN	NaN	NaN	10.8273	NaN	NaN	8.97647	NaN	NaN	11.1147	NaN	7.23594	NaN	NaN	NaN	NaN	NaN	NaN	NaN	NaN	NaN	NaN	9.91368	11.1675
502	WDWGST	6	376.156	750.297	2	10.1148	NaN	9.316	10.0477	7.89024	6.79193	9.41619	8.7603	NaN	9.48573	9.22593	10.122	9.42484	NaN	NaN	NaN	NaN	13.8721	9.16119	6.89716	7.61478	8.7551	7.89947	15.2307
503	SQLLLYPYG	9	527.283	1052.55	2	11.8793	NaN	NaN	11.8951	9.1891	8.951	11.3404	NaN	9.09851	14.044	12.6156	11.9004	11.5648	12.5981	11.0855	NaN	NaN	10.8972	NaN	9.36327	NaN	11.3209	NaN	11.2876
504	MAVCAGGDGV	10	476.697	951.379	2	NaN	NaN	NaN	8.85314	NaN	NaN	NaN	NaN	NaN	10.2563	NaN	NaN	9.46291	NaN	8.61396	NaN	8.46824	9.08108	NaN	NaN	NaN	8.52797	7.6983	NaN
505	NLNEGELCLN	10	588.763	1175.51	2	14.3215	11.6633	14.9941	14.8611	12.8326	12.1988	14.7515	13.7061	14.3373	14.717	15.7522	15.3249	13.1175	NaN	12.6905	12.6178	NaN	13.8252	16.0805	14.297	15.466	15.329	14.5685	14.0642
506	QVDEGELCLNSAQC	14	811.842	1621.67	2	14.9457	NaN	14.0649	NaN	NaN	NaN	NaN	14.3551	NaN	NaN	15.8025	NaN	14.3896	NaN	NaN	NaN	13.9468	NaN	NaN	NaN	NaN	NaN	NaN	NaN
507	TMVVHEKPDDLG	12	670.829	1339.64	2	14.1151	NaN	NaN	13.9775	NaN	NaN	13.7918	13.3384	NaN	NaN	12.1178	NaN	13.1725	NaN	NaN	NaN	NaN	13.4426	13.1433	14.116	13.9448	NaN	13.6924	NaN
508	WEVTQASGV	9	488.74	975.466	2	13.9797	11.072	NaN	12.4998	11.698	11.0909	13.2175	13.2069	11.3376	14.4304	15.1132	14.9643	11.4641	13.4509	NaN	13.0173	13.871	14.3726	13.5442	13.0585	12.2655	NaN	NaN	13.895
509	LAGAGALLPVVNYQ	14	693.884	1385.76	2	NaN	NaN	NaN	13.0014	NaN	NaN	12.2014	NaN	NaN	14.0091	12.8198	13.1961	NaN	NaN	NaN	NaN	NaN	NaN	NaN	NaN	NaN	12.3491	NaN	12.6013
510	VAEHPQL	7	397.214	792.413	2	9.82208	6.9052	10.6634	NaN	8.23762	7.50189	9.01849	10.3315	8.36623	10.5715	12.3867	12.3444	8.13415	NaN	NaN	9.40676	10.2985	10.8421	11.5071	9.29891	9.52679	10.0675	11.0172	11.4036
511	DCGFHA	6	353.634	705.254	2	NaN	NaN	NaN	NaN	NaN	NaN	NaN	NaN	NaN	NaN	NaN	10.6177	9.54127	NaN	NaN	9.53536	NaN	NaN	NaN	NaN	10.7516	10.0305	10.5207	NaN
512	TEAPADKDELDQL	13	722.843	1443.67	2	14.0614	10.6221	14.239	12.8433	12.8682	12.5331	NaN	15.1207	12.3704	15.4166	13.3913	12.8388	12.4853	12.5448	12.9361	13.3619	14.3242	15.0468	13.0564	13.687	12.8551	14.0413	15.2603	15.2755
513	FLVDNPYTE	9	549.262	1096.51	2	NaN	NaN	NaN	10.5978	NaN	NaN	9.8955	NaN	NaN	9.91306	NaN	NaN	NaN	NaN	NaN	8.81145	NaN	9.67689	NaN	NaN	NaN	NaN	NaN	9.35507
514	FSTGGNNRPALWL	13	716.87	1431.73	2	NaN	NaN	11.6297	12.0373	NaN	NaN	11.1952	12.5047	NaN	12.5798	13.3231	12.3382	NaN	NaN	NaN	NaN	11.0282	11.5898	NaN	NaN	10.02	NaN	NaN	NaN
515	LNDEGELCLNSAQC	14	811.842	1621.67	2	NaN	11.4801	NaN	15.9328	13.5316	13.5701	15.6589	NaN	13.7359	15.739	NaN	NaN	14.3896	NaN	NaN	NaN	NaN	14.4781	15.0717	NaN	15.0669	15.6066	NaN	NaN
516	DMSPLRPQN	9	529.259	1056.5	2	12.1565	8.90976	12.2204	NaN	NaN	NaN	NaN	NaN	NaN	10.8936	11.6902	11.6911	NaN	NaN	NaN	NaN	NaN	NaN	NaN	NaN	NaN	10.5356	NaN	NaN
517	EWVTQASGVW	10	581.779	1161.55	2	NaN	NaN	NaN	NaN	NaN	NaN	NaN	NaN	8.3039	NaN	11.8878	NaN	10.3667	NaN	NaN	NaN	13.1953	14.0168	NaN	12.2848	NaN	NaN	NaN	NaN
518	YQASGGTLNWTYNQGLK	17	951.453	1900.9	2	NaN	NaN	NaN	NaN	NaN	9.63262	NaN	NaN	NaN	11.8233	NaN	NaN	NaN	NaN	NaN	NaN	NaN	NaN	NaN	NaN	NaN	10.8741	NaN	12.0452
519	SYWGSK	6	364.174	726.334	2	8.62744	NaN	8.00826	NaN	10.4883	9.90374	6.30829	11.9554	NaN	9.2774	NaN	NaN	10.6538	NaN	NaN	8.80424	8.90559	10.0068	NaN	7.33669	NaN	NaN	10.0819	10.9986
520	ADGSWQVHG	9	478.715	955.415	2	NaN	NaN	NaN	NaN	NaN	NaN	NaN	NaN	NaN	NaN	11.0944	12.1973	NaN	NaN	NaN	NaN	NaN	NaN	NaN	NaN	NaN	10.9558	NaN	10.036
521	QLQVDGK	7	394.219	786.424	2	8.78613	NaN	8.72198	NaN	NaN	NaN	NaN	NaN	NaN	8.58458	NaN	NaN	8.10607	NaN	8.85544	NaN	NaN	NaN	NaN	8.91447	NaN	NaN	NaN	NaN
522	VVVGEHNL	8	433.741	865.466	2	9.4609	NaN	10.6855	7.28998	NaN	NaN	NaN	NaN	6.58857	9.15055	NaN	9.12842	NaN	NaN	NaN	NaN	7.91828	8.89525	NaN	8.64573	9.19726	8.17386	NaN	8.22724
523	QSLLLYPYGY	10	608.816	1215.62	2	8.07577	NaN	NaN	NaN	NaN	9.56381	NaN	NaN	NaN	9.44929	NaN	NaN	9.73609	NaN	NaN	8.24698	8.1987	NaN	NaN	NaN	NaN	NaN	9.05316	9.09147
524	SAMADFNDGK	10	536.223	1070.43	2	NaN	NaN	NaN	10.8	NaN	NaN	NaN	11.7445	NaN	NaN	NaN	NaN	NaN	NaN	NaN	NaN	NaN	NaN	NaN	NaN	NaN	11.2121	NaN	11.1491
525	GNTWVLL	7	401.726	801.438	2	7.29579	NaN	7.25081	8.11124	NaN	NaN	7.47964	7.75457	NaN	6.90688	NaN	NaN	7.27652	6.62233	NaN	NaN	NaN	NaN	7.1878	NaN	6.95837	6.479	6.9008	6.70222
526	LLETECPK	8	495.253	988.49	2	9.9823	NaN	NaN	10.2597	8.86648	8.61063	9.8654	10.0145	NaN	10.0244	NaN	NaN	8.49185	10.2495	NaN	NaN	8.68438	NaN	10.1547	NaN	10.0427	10.2337	NaN	10.1077
527	VDDCPLCT	8	490.197	978.379	2	NaN	NaN	NaN	NaN	NaN	NaN	NaN	NaN	NaN	NaN	9.44584	9.17281	NaN	7.83307	NaN	NaN	NaN	NaN	NaN	NaN	NaN	NaN	NaN	NaN
528	YSSYSCSNTELTCNS	15	886.84	1771.67	2	NaN	NaN	NaN	12.5584	NaN	NaN	NaN	NaN	NaN	13.1514	12.3132	NaN	NaN	NaN	NaN	NaN	NaN	NaN	NaN	NaN	NaN	NaN	NaN	NaN
529	WEVTQASGVWF	11	655.313	1308.61	2	9.2833	NaN	NaN	9.74434	8.27503	9.0121	8.77831	NaN	NaN	9.3414	NaN	NaN	NaN	NaN	NaN	NaN	8.61481	9.61997	NaN	NaN	NaN	NaN	NaN	NaN
530	LDDNFSGSFCNEGK	14	795.821	1589.63	2	12.1805	NaN	NaN	10.8665	NaN	10.5395	10.4777	11.2727	8.95822	12.3009	NaN	NaN	12.0461	11.0539	11.9238	NaN	NaN	NaN	NaN	10.8673	NaN	11.4065	10.9836	11.9415
531	LQLGSSYEGR	10	555.283	1108.55	2	13.0557	9.34151	12.6692	9.56786	13.7687	14.055	10.2845	14.9701	NaN	13.1601	NaN	NaN	12.9728	NaN	NaN	13.3822	13.5626	14.7792	NaN	11.6258	NaN	NaN	15.2185	15.6898
532	DTMVCAGGDGVLSA	14	684.791	1367.57	2	12.8315	NaN	13.6204	NaN	NaN	NaN	13.5882	13.728	NaN	NaN	NaN	NaN	13.4797	13.2568	13.4948	NaN	NaN	NaN	NaN	NaN	13.5182	14.9138	NaN	NaN
533	NNACEAFL	8	469.705	937.396	2	NaN	NaN	NaN	12.536	11.4253	10.3981	12.3411	12.1649	NaN	NaN	11.4873	NaN	11.4738	NaN	11.3899	NaN	NaN	11.357	11.0954	NaN	11.4402	11.4524	NaN	NaN
534	NNSPCYLTGWGLT	13	741.837	1481.66	2	10.6448	NaN	NaN	NaN	9.50891	NaN	NaN	NaN	NaN	11.308	NaN	NaN	NaN	NaN	NaN	9.94593	10.2484	11.5111	NaN	NaN	NaN	NaN	10.9067	11.4928
535	ELEDLEHL	8	499.245	996.476	2	8.42137	NaN	8.64557	NaN	NaN	NaN	NaN	NaN	NaN	NaN	NaN	NaN	7.28695	NaN	NaN	NaN	NaN	NaN	NaN	NaN	6.76231	NaN	NaN	NaN
536	SEYFGDGR	8	465.702	929.388	2	NaN	NaN	NaN	NaN	10.6268	10.2821	NaN	12.6825	NaN	10.6352	NaN	NaN	11.0196	NaN	NaN	8.9595	NaN	9.90077	NaN	NaN	NaN	NaN	11.7863	12.7255
537	VAEHPQLVS	9	490.264	978.513	2	17.7241	NaN	17.7655	16.0503	14.3331	NaN	NaN	NaN	15.1625	17.9715	NaN	17.1666	NaN	NaN	12.8033	NaN	NaN	17.8857	17.1905	NaN	16.1823	NaN	NaN	16.6601
538	WVDL	4	532.276	531.269	1	NaN	NaN	NaN	11.5019	NaN	NaN	11.1452	11.3172	NaN	NaN	NaN	NaN	NaN	NaN	NaN	NaN	NaN	NaN	NaN	NaN	NaN	NaN	NaN	NaN
539	DTMVCAGGDGVLSA	14	676.793	1351.57	2	16.6876	NaN	16.905	16.428	NaN	NaN	16.1011	15.9946	NaN	17.6795	17.7942	17.752	16.8888	16.3427	15.7825	NaN	NaN	NaN	16.5591	NaN	16.5851	16.8515	16.1313	16.5129
540	NGDSGGPLNCQ	11	559.731	1117.45	2	10.7861	7.93789	NaN	8.87897	NaN	NaN	NaN	NaN	NaN	NaN	10.7168	NaN	NaN	NaN	NaN	NaN	NaN	NaN	NaN	NaN	NaN	9.79056	NaN	9.33617
541	TACAHWSGNC	10	582.224	1162.43	2	7.07356	NaN	NaN	8.70212	NaN	NaN	8.66663	NaN	7.22417	NaN	10.8833	11.2928	NaN	10.3497	8.74755	6.69046	7.86763	8.39006	12.0051	7.78661	10.9954	9.14765	NaN	NaN
542	GLNQALVDLH	10	540.294	1078.58	2	10.6565	NaN	9.81094	NaN	8.20939	NaN	NaN	NaN	NaN	10.8643	NaN	NaN	9.11171	NaN	NaN	NaN	NaN	9.4014	NaN	NaN	8.09428	NaN	NaN	9.67151
543	FGLYDLDNK	9	542.769	1083.52	2	NaN	NaN	NaN	NaN	NaN	NaN	NaN	NaN	NaN	NaN	NaN	NaN	NaN	8.8659	8.33073	NaN	NaN	NaN	NaN	NaN	NaN	NaN	NaN	NaN
544	VGNYPELL	8	452.742	903.47	2	NaN	NaN	NaN	9.22134	NaN	7.71167	8.52906	NaN	NaN	NaN	NaN	NaN	8.82144	NaN	8.53564	NaN	NaN	NaN	NaN	NaN	NaN	NaN	NaN	NaN
545	NWNAGFGGAGA	11	511.719	1021.43	2	12.6458	NaN	12.4583	13.6109	12.3026	11.6739	13.4214	NaN	NaN	13.9802	14.3667	NaN	NaN	NaN	NaN	14.6011	15.1538	15.6783	13.551	12.3082	12.5407	13.5752	13.4298	13.444
546	SLVGSLTNTNFGLCHDV	17	611.965	1832.87	3	10.6953	NaN	NaN	NaN	8.41411	10.1805	8.88553	9.50478	NaN	NaN	NaN	NaN	NaN	NaN	NaN	NaN	7.32491	NaN	NaN	NaN	NaN	10.4313	10.0773	11.1793
547	ESNECSA	7	398.643	795.27	2	11.6935	NaN	11.6882	11.66	NaN	NaN	11.6856	NaN	NaN	12.1899	11.6857	11.9398	NaN	10.3711	NaN	NaN	NaN	NaN	NaN	11.5995	11.8146	11.3575	NaN	11.1934
548	PGPNKPALF	9	470.766	939.518	2	13.6519	NaN	13.7538	13.9891	12.7502	NaN	13.0609	13.6967	NaN	14.4706	13.6199	13.1881	NaN	NaN	NaN	NaN	12.9165	14.0867	14.0283	13.5865	13.647	13.1115	NaN	13.0965
549	LTLPNNYV	8	467.255	932.497	2	8.29453	NaN	NaN	9.96655	NaN	NaN	9.41611	NaN	8.72127	NaN	10.5742	11.0139	NaN	8.79638	8.38857	NaN	NaN	9.01811	NaN	NaN	9.55673	9.66056	9.23801	9.34015
550	KNNLEVEDEQGS	12	681.804	1361.59	2	NaN	NaN	NaN	NaN	NaN	NaN	9.88564	NaN	NaN	NaN	NaN	NaN	NaN	9.97116	NaN	NaN	NaN	NaN	10.9927	NaN	NaN	11.2685	10.4094	NaN
551	DYSHDLM	7	440.678	879.343	2	11.5917	NaN	11.4906	10.9318	NaN	NaN	11.0261	10.2597	9.68502	10.1591	9.91447	9.57438	10.0259	11.6877	10.7199	8.6749	9.26562	9.98515	10.9309	11.0598	11.3006	11.3577	10.9226	10.2284
552	EFPAVPYK	8	475.752	949.491	2	NaN	NaN	NaN	NaN	NaN	NaN	NaN	9.53071	NaN	9.94888	9.03956	NaN	NaN	NaN	NaN	NaN	NaN	NaN	NaN	NaN	NaN	NaN	NaN	NaN
553	STQNAELAENCDKDLHG	17	634.943	1901.81	3	NaN	NaN	NaN	NaN	NaN	NaN	16.2522	NaN	15.3544	NaN	NaN	NaN	15.5984	16.7481	NaN	14.7042	NaN	16.0522	17.0438	NaN	16.2592	16.4715	NaN	16.1506
554	HTDSASDDFPAGTL	14	717.316	1432.61	2	13.7536	NaN	NaN	14.0487	NaN	NaN	NaN	12.9294	NaN	NaN	NaN	NaN	13.3003	NaN	12.6902	10.0751	NaN	11.3794	13.1705	NaN	NaN	NaN	NaN	NaN
555	PGSDLPLDFGGCVP	14	715.835	1429.65	2	NaN	NaN	10.8041	10.4435	NaN	NaN	NaN	10.1917	NaN	NaN	11.0783	NaN	NaN	NaN	NaN	NaN	NaN	10.2547	NaN	9.09804	NaN	10.7284	10.5053	NaN
556	LSLPQDYPCYVTGWG	15	878.406	1754.8	2	10.3832	NaN	NaN	NaN	9.15988	9.65423	9.86108	NaN	NaN	10.877	10.3771	10.4834	NaN	NaN	NaN	NaN	NaN	10.1597	NaN	NaN	9.92737	NaN	NaN	NaN
557	PGPNKAPLF	9	470.766	939.518	2	NaN	NaN	NaN	13.9891	NaN	12.1251	NaN	13.6967	NaN	NaN	13.6199	NaN	NaN	NaN	NaN	NaN	NaN	NaN	NaN	13.5865	13.647	NaN	13.269	NaN
558	HGCLSSSLT	9	481.225	960.434	2	11.0866	NaN	11.2428	NaN	NaN	NaN	NaN	10.5095	NaN	11.0817	10.7118	NaN	NaN	NaN	NaN	NaN	NaN	NaN	NaN	NaN	NaN	NaN	NaN	11.3532
559	FGLLPESQLQAT	12	652.347	1302.68	2	NaN	NaN	11.4149	10.9963	NaN	NaN	NaN	NaN	NaN	NaN	NaN	NaN	NaN	10.8879	11.1519	NaN	NaN	NaN	NaN	NaN	NaN	NaN	NaN	NaN
560	KNCGYPGLSPEDCAA	15	819.848	1637.68	2	12.2473	NaN	NaN	15.5902	12.7719	12.7704	15.4375	14.0762	13.8676	13.3266	NaN	13.1267	11.7929	NaN	12.1644	10.6936	11.7687	12.2089	13.0445	NaN	13.2508	15.468	14.4975	NaN
561	LAEPVELSDTL	11	593.813	1185.61	2	NaN	NaN	NaN	9.05961	NaN	NaN	NaN	NaN	NaN	8.26391	8.73851	NaN	9.72961	NaN	NaN	NaN	NaN	NaN	NaN	NaN	NaN	NaN	NaN	NaN
562	PATCEGDK	8	439.191	876.365	2	NaN	NaN	NaN	10.2743	NaN	8.79819	NaN	NaN	NaN	10.0573	9.86899	9.90428	NaN	NaN	NaN	NaN	NaN	NaN	NaN	NaN	9.79755	9.81841	9.69925	9.55573
563	MPEPGSDPLLDFN	13	716.326	1430.64	2	11.034	NaN	NaN	11.785	10.269	NaN	11.5759	11.5921	10.544	12.3106	NaN	11.7351	9.09734	NaN	NaN	9.83196	NaN	NaN	NaN	10.5522	NaN	NaN	NaN	11.3311
564	CGLPAAGTLLPN	12	592.31	1182.61	2	NaN	NaN	10.0356	NaN	NaN	NaN	NaN	8.08468	NaN	NaN	9.44131	10.395	NaN	NaN	NaN	NaN	NaN	NaN	NaN	NaN	NaN	NaN	NaN	NaN
565	SSQYFGDGR	9	509.218	1016.42	2	NaN	NaN	NaN	NaN	10.6366	10.6476	NaN	12.1081	NaN	10.9091	NaN	NaN	10.92	NaN	NaN	NaN	NaN	NaN	NaN	NaN	NaN	NaN	11.7934	NaN
566	DGVWTLV	7	395.21	788.407	2	7.82728	NaN	6.82631	9.11229	7.27204	NaN	8.03604	8.70254	NaN	8.28279	NaN	7.64852	9.11295	NaN	7.08055	NaN	NaN	NaN	NaN	NaN	NaN	7.11315	7.68087	8.00156
567	SQLLLYPY	8	498.773	995.533	2	10.3658	NaN	6.66803	9.56392	NaN	NaN	NaN	10.6928	NaN	10.9374	NaN	NaN	10.4327	NaN	8.48596	8.94307	9.13381	10.1382	NaN	NaN	NaN	NaN	10.2859	10.4049
568	DEELACTV	8	468.702	935.391	2	NaN	NaN	NaN	8.19384	7.77884	NaN	8.71835	9.33761	7.37872	NaN	NaN	NaN	NaN	NaN	NaN	NaN	NaN	NaN	8.02361	NaN	NaN	7.94798	8.8995	8.99929
569	WEVTQASGVWFA	12	690.832	1379.65	2	11.6784	NaN	NaN	NaN	10.7952	11.684	10.0947	12.2784	NaN	12.0908	NaN	NaN	NaN	NaN	NaN	10.7371	11.5543	12.5233	NaN	NaN	NaN	8.65516	11.5526	11.7044
570	GPTLTQLL	8	422.244	842.475	2	NaN	NaN	NaN	10.6148	8.2389	6.97845	NaN	9.10181	8.18684	8.92401	8.71603	8.57636	7.26531	NaN	NaN	NaN	NaN	8.45107	NaN	7.88329	9.05985	9.56482	9.00428	8.67949
571	NFVDGQDVNDWLGPPNNDGVLK	22	805.053	2412.13	3	NaN	NaN	NaN	NaN	NaN	NaN	14.9855	14.3526	NaN	NaN	NaN	NaN	NaN	NaN	NaN	NaN	NaN	NaN	NaN	NaN	NaN	NaN	13.8507	NaN
572	LVAEHPQLVS	10	546.806	1091.6	2	NaN	NaN	11.9844	NaN	NaN	9.27523	12.6554	11.6871	11.1795	13.7239	14.0904	13.6631	10.3486	12.3992	NaN	11.7858	12.8518	13.326	12.4003	NaN	11.0935	13.6314	12.8229	12.8308
573	ADGSWQVHGV	10	528.25	1054.48	2	NaN	NaN	NaN	NaN	NaN	NaN	9.14889	9.54632	8.02159	9.26351	9.83948	10.1894	10.2014	10.1539	10.8171	NaN	NaN	NaN	NaN	NaN	8.08251	NaN	NaN	10.0866
574	NTQLTCNS	8	469.698	937.381	2	8.81866	NaN	8.5018	10.0375	NaN	NaN	NaN	8.41204	NaN	NaN	10.4857	NaN	NaN	8.83293	NaN	NaN	NaN	8.01977	9.22665	NaN	8.50616	9.72129	8.97552	NaN
575	YLPTVDY	7	435.715	869.417	2	8.12206	NaN	9.20463	NaN	NaN	NaN	7.77362	NaN	7.65883	8.15472	8.50842	9.0829	NaN	NaN	NaN	NaN	NaN	NaN	9.08714	NaN	9.35839	8.21694	NaN	NaN
576	DCQLVGLL	8	459.241	916.469	2	12.2752	8.61849	NaN	13.6343	12.2872	12.8457	12.4205	12.9741	8.1649	12.7282	10.0334	NaN	12.09	9.73153	9.92321	10.6433	9.87332	11.5765	NaN	10.6057	NaN	11.264	11.981	11.456
577	LLTLMEHT	8	487.254	972.495	2	NaN	NaN	NaN	NaN	NaN	NaN	NaN	NaN	8.2911	10.0045	10.7879	10.3308	NaN	NaN	NaN	NaN	NaN	NaN	10.2872	NaN	NaN	9.93599	9.79906	NaN
578	SGNENEFRDMVT	12	707.8	1413.58	2	NaN	NaN	NaN	10.9808	NaN	NaN	10.5463	11.8386	NaN	11.3146	10.9801	NaN	NaN	NaN	NaN	NaN	NaN	10.8949	NaN	NaN	NaN	NaN	10.5453	NaN
579	LEDSVLAL	8	430.241	858.47	2	10.7241	NaN	10.6019	NaN	NaN	NaN	10.9993	NaN	NaN	NaN	NaN	NaN	NaN	NaN	NaN	NaN	NaN	10.3339	9.49765	10.7696	NaN	9.31342	9.53309	NaN
580	FSTGGNNRAPL	11	567.289	1132.56	2	NaN	NaN	NaN	9.64435	NaN	NaN	9.77249	10.6679	NaN	NaN	NaN	NaN	NaN	NaN	8.60211	NaN	NaN	NaN	NaN	10.1859	NaN	NaN	NaN	NaN
581	LAPSACAPAGTLC	13	644.804	1287.6	2	NaN	NaN	NaN	NaN	NaN	NaN	NaN	NaN	NaN	NaN	NaN	NaN	11.2077	NaN	10.9006	NaN	NaN	NaN	NaN	NaN	NaN	NaN	NaN	NaN
582	TVQYDSSGQ	9	492.717	983.42	2	NaN	NaN	NaN	NaN	NaN	NaN	NaN	NaN	NaN	8.45806	NaN	7.96245	NaN	NaN	NaN	NaN	NaN	NaN	NaN	NaN	NaN	7.74404	NaN	8.04292
583	EWLSHAFCQ	9	589.257	1176.5	2	9.42518	NaN	NaN	9.58366	NaN	NaN	8.87915	9.69588	NaN	10.6754	NaN	NaN	NaN	9.73143	10.5963	8.62754	NaN	9.80489	NaN	NaN	NaN	NaN	8.9947	NaN
584	FLCDCDR	7	493.197	984.379	2	NaN	NaN	NaN	10.015	NaN	NaN	9.87916	9.74095	NaN	10.3263	NaN	NaN	8.85923	8.44393	NaN	NaN	NaN	NaN	NaN	NaN	NaN	10.0561	9.67198	9.61615
585	HTLEELYDFM	10	649.292	1296.57	2	13.5823	NaN	12.8482	13.2578	NaN	NaN	12.4788	11.9954	NaN	NaN	NaN	NaN	13.2026	NaN	NaN	NaN	11.5169	NaN	NaN	NaN	11.5246	NaN	NaN	NaN
586	DEGELCLNSAQC	12	698.278	1394.54	2	14.473	11.3915	14.494	14.2239	12.2584	11.9219	14.2639	13.0009	12.2966	14.5464	NaN	13.6032	12.799	NaN	12.3248	12.3494	13.1194	13.5687	14.5573	14.6319	14.6655	13.8861	13.6291	12.3405
587	FYLNTGDASNFA	12	660.299	1318.58	2	NaN	NaN	NaN	12.1971	NaN	10.6187	NaN	NaN	NaN	13.0026	NaN	NaN	NaN	NaN	NaN	11.4547	11.4488	12.6246	NaN	NaN	NaN	NaN	12.674	12.5291
588	AEDGSWEV	8	446.687	891.361	2	13.2445	NaN	13.4247	12.3867	10.9082	10.0279	12.4073	11.9695	11.4918	13.3465	12.6582	13.11	12.9315	NaN	NaN	9.80426	NaN	10.8772	13.1629	12.003	13.47	NaN	NaN	12.374
589	SYSYSCSNTELTCNS	15	886.84	1771.67	2	11.3614	NaN	NaN	12.5584	NaN	NaN	11.8779	10.9944	NaN	13.1514	NaN	NaN	NaN	NaN	NaN	NaN	NaN	NaN	10.8804	NaN	NaN	11.7478	NaN	11.2163
590	QSLLLYPY	8	498.773	995.533	2	NaN	NaN	NaN	NaN	10.3766	10.019	8.91545	NaN	NaN	NaN	NaN	NaN	10.4327	8.10668	NaN	NaN	NaN	NaN	NaN	7.31843	NaN	8.00992	10.2859	NaN
591	VTVTSENR	8	453.238	904.461	2	8.40138	NaN	8.72104	NaN	8.63977	8.53047	NaN	10.2777	NaN	9.86376	NaN	NaN	8.84195	NaN	7.05492	8.67517	9.38694	NaN	NaN	9.33747	NaN	NaN	9.43932	10.0443
592	DFVACNHL	8	488.22	974.428	2	NaN	NaN	NaN	NaN	NaN	8.55909	NaN	NaN	NaN	NaN	NaN	NaN	11.1793	NaN	8.46535	NaN	NaN	NaN	NaN	NaN	NaN	NaN	NaN	NaN
593	MPEPGSNPLLDFN	13	716.326	1430.64	2	NaN	NaN	12.0299	NaN	10.269	NaN	11.5759	11.5921	NaN	NaN	12.522	NaN	NaN	NaN	NaN	NaN	NaN	NaN	12.5785	10.5522	11.5912	NaN	11.7585	NaN
594	CDGDSGGPLNCQ	12	640.237	1278.46	2	NaN	NaN	NaN	13.9129	12.0409	11.3016	14.0474	NaN	NaN	15.7109	15.3457	15.3503	14.1311	NaN	NaN	NaN	11.6494	NaN	14.3647	13.0989	14.7318	14.7416	13.633	NaN
595	NSLLAPDWV	9	507.767	1013.52	2	8.42108	NaN	9.10025	NaN	NaN	NaN	NaN	NaN	NaN	NaN	NaN	NaN	NaN	7.32709	NaN	NaN	NaN	NaN	NaN	NaN	9.10642	NaN	NaN	NaN
596	VYDFCSQETVREEV	14	587.597	1759.77	3	9.7758	NaN	NaN	NaN	NaN	NaN	NaN	NaN	NaN	NaN	9.83406	9.30624	10.5157	NaN	NaN	NaN	NaN	NaN	NaN	NaN	NaN	NaN	NaN	NaN
597	CSSNTELTCNS	11	636.745	1271.48	2	12.0295	9.03125	11.8435	NaN	9.57117	8.9142	12.4046	NaN	NaN	12.5892	12.4623	12.6465	NaN	NaN	11.9294	10.3147	NaN	11.5667	12.4479	11.0838	12.5384	12.4414	NaN	NaN
598	NSYVQLGVLPR	11	623.35	1244.69	2	9.6944	NaN	8.49583	NaN	NaN	NaN	8.3235	NaN	NaN	9.79905	NaN	NaN	9.54217	NaN	8.69192	NaN	9.00528	9.88428	NaN	9.53649	NaN	8.57592	9.31208	9.68153
599	QDQCLDNR	8	525.222	1048.42	2	8.43453	NaN	8.13261	NaN	8.27435	8.23113	NaN	9.18923	NaN	8.36049	NaN	NaN	8.41005	NaN	NaN	7.00868	7.55761	8.42416	NaN	8.13038	NaN	NaN	9.43336	NaN
600	LQTGLPGGTYCDVLSGDK	18	627.64	1879.9	3	14.6725	10.3068	14.2756	14.5119	11.8144	13.2387	13.5966	NaN	12.2232	NaN	14.4173	13.1838	14.3976	13.4752	13.5927	NaN	11.3146	12.246	11.2672	12.7193	13.1124	15.0635	14.4006	12.9999
601	EANGSWQV	8	446.196	890.377	2	12.3175	NaN	NaN	NaN	NaN	NaN	NaN	NaN	NaN	12.5386	NaN	NaN	11.4638	NaN	NaN	NaN	NaN	NaN	12.3307	10.975	12.3617	NaN	NaN	11.29
602	NNACEAFLCNCDR	13	548.549	1642.63	3	12.4677	9.9746	NaN	12.8763	13.2311	12.1235	12.72	12.5	10.5775	13.295	11.502	10.924	13.7783	13.479	13.8132	11.3468	NaN	12.2606	10.7249	NaN	NaN	11.2697	11.8283	13.372
603	EAVLTY	6	695.359	694.354	1	NaN	NaN	NaN	NaN	NaN	NaN	10.0983	NaN	NaN	NaN	NaN	NaN	NaN	NaN	NaN	NaN	NaN	NaN	NaN	10.9698	NaN	NaN	11.6859	11.6009
604	CPVGYLGPR	9	509.76	1017.51	2	NaN	NaN	NaN	NaN	NaN	NaN	9.81451	NaN	NaN	NaN	NaN	NaN	NaN	NaN	NaN	NaN	NaN	NaN	9.51194	NaN	8.93233	NaN	NaN	NaN
605	SLEEKPCS	8	475.218	948.422	2	8.91348	NaN	9.81302	7.86099	NaN	NaN	8.33563	NaN	7.5849	9.28468	9.0117	8.17476	NaN	NaN	NaN	NaN	7.46653	NaN	9.85095	NaN	10.0299	8.37596	7.9679	NaN
606	SSNEALPEGL	10	508.748	1015.48	2	12.4029	9.71588	12.7374	10.6253	9.24441	NaN	10.6259	10.1335	10.3068	11.0262	11.2492	11.9801	10.5138	9.68922	9.72844	NaN	NaN	NaN	12.4601	11.112	12.596	11.4693	10.4566	10.8468
607	SSYEGRLP	8	454.727	907.44	2	NaN	NaN	NaN	NaN	NaN	NaN	NaN	NaN	8.60001	NaN	11.7798	11.1265	NaN	NaN	NaN	8.93956	NaN	10.5093	NaN	NaN	8.68512	10.3492	NaN	NaN
608	TNPDGFAFTH	10	553.749	1105.48	2	12.6333	NaN	NaN	NaN	11.4593	10.4234	12.2034	12.8056	9.63314	13.1744	NaN	NaN	NaN	NaN	NaN	11.1238	NaN	NaN	NaN	10.8987	NaN	NaN	NaN	NaN
609	TVVVTGTLK	9	459.287	916.559	2	11.4299	8.56587	11.5525	10.7635	9.14808	NaN	10.8383	10.755	NaN	10.9309	9.08466	NaN	10.7446	10.5932	10.3187	9.47425	NaN	10.5405	NaN	11.2055	10.451	10.2796	10.7551	NaN
610	LELV	4	473.296	472.29	1	NaN	NaN	NaN	NaN	NaN	NaN	NaN	NaN	NaN	NaN	12.7864	12.7963	NaN	NaN	NaN	NaN	NaN	NaN	NaN	NaN	NaN	NaN	11.7768	NaN
611	LTSLYGTK	8	441.749	881.486	2	NaN	NaN	NaN	NaN	11.0573	10.9317	NaN	11.8747	NaN	10.3461	NaN	NaN	9.19542	NaN	NaN	10.6537	10.7144	12.3149	NaN	NaN	NaN	NaN	11.2157	11.5716
612	ELATLYGTK	9	498.273	994.534	2	10.7355	NaN	7.8943	NaN	11.3937	12.0565	NaN	12.9466	NaN	10.5067	NaN	NaN	10.1088	NaN	NaN	10.8535	10.7724	12.4455	NaN	8.69308	NaN	NaN	11.2111	12.249
613	SGNENEF	7	398.659	795.304	2	NaN	NaN	NaN	12.0437	NaN	10.2458	11.3426	12.395	9.87096	12.2248	11.6244	NaN	NaN	NaN	NaN	NaN	NaN	10.9156	NaN	NaN	NaN	NaN	11.891	12.0788
614	QSPNGFAFTH	10	553.749	1105.48	2	NaN	NaN	NaN	NaN	NaN	NaN	12.2034	NaN	NaN	NaN	NaN	NaN	NaN	NaN	NaN	NaN	11.7317	NaN	NaN	NaN	NaN	12.5835	12.9502	13.1012
615	DMNMSPLRPQ	10	595.27	1188.53	2	11.2227	8.05875	11.63	NaN	NaN	NaN	10.5228	NaN	9.01497	NaN	10.3415	NaN	NaN	NaN	NaN	NaN	NaN	NaN	NaN	NaN	NaN	10.7495	NaN	NaN
616	FNTWLNQV	8	511.258	1020.5	2	12.5151	9.5261	12.6347	10.4742	9.32897	8.85864	10.4865	10.7579	8.55703	10.5724	10.0466	10.2809	11.7119	11.309	10.1209	NaN	8.80033	9.08294	12.2589	11.7256	12.0116	10.4316	10.7127	10.5116
617	TGEECEECPPR	11	682.266	1362.52	2	9.28822	NaN	9.30521	NaN	NaN	NaN	8.09962	NaN	NaN	8.40106	8.94809	9.03483	NaN	9.27826	NaN	NaN	NaN	NaN	8.44221	NaN	9.08563	8.98788	7.74515	NaN
618	GLAEGDHGFHV	11	380.181	1137.52	3	11.7979	NaN	NaN	9.89046	NaN	NaN	NaN	NaN	10.7153	NaN	13.6206	13.1473	9.97953	10.7168	NaN	10.3619	NaN	NaN	NaN	11.846	NaN	NaN	12.4057	NaN
619	GLPGGTYCNVLSGDK	15	769.86	1537.71	2	16.7143	NaN	NaN	NaN	NaN	NaN	NaN	15.9332	NaN	16.3008	16.1235	NaN	NaN	NaN	NaN	NaN	NaN	14.5053	15.6744	NaN	15.7896	NaN	16.2251	16.7092
620	LTGLDAPEPCFQGTPEL	17	922.939	1843.87	2	NaN	NaN	13.2024	NaN	NaN	NaN	NaN	NaN	NaN	NaN	NaN	NaN	NaN	NaN	NaN	NaN	NaN	NaN	12.6257	12.573	NaN	10.9448	NaN	NaN
621	SLVGSAGCSEK	11	547.761	1093.51	2	9.16314	NaN	NaN	NaN	NaN	NaN	NaN	NaN	NaN	NaN	8.39463	8.8661	NaN	8.15303	NaN	NaN	NaN	NaN	NaN	NaN	NaN	NaN	NaN	NaN
622	LLPVVDYQHCS	11	665.826	1329.64	2	NaN	NaN	NaN	NaN	NaN	NaN	10.0378	NaN	NaN	10.8841	NaN	NaN	10.4875	12.7959	12.8504	NaN	NaN	NaN	NaN	NaN	NaN	NaN	NaN	NaN
623	CCNWPS	6	412.147	822.279	2	10.8372	NaN	10.6491	NaN	NaN	8.94413	NaN	9.72161	NaN	10.8485	11.0861	10.5528	10.0448	11.4496	10.5721	NaN	NaN	10.1285	NaN	NaN	10.0419	10.4813	NaN	NaN
624	LLPTAQETWLA	11	621.839	1241.67	2	NaN	NaN	NaN	NaN	NaN	NaN	NaN	NaN	NaN	NaN	NaN	NaN	NaN	NaN	NaN	NaN	10.4684	11.1391	NaN	NaN	NaN	NaN	NaN	NaN
625	FLVDNPY	7	434.214	866.417	2	7.9322	NaN	NaN	9.77788	8.12115	NaN	9.79132	9.38908	8.50606	8.80484	8.7155	8.63438	9.0237	8.40081	7.98728	NaN	NaN	8.11221	9.9862	NaN	9.29827	8.86753	8.79937	8.82736
626	TAPSVYPLAPCG	12	616.801	1231.59	2	12.679	NaN	12.359	11.5135	NaN	NaN	NaN	NaN	NaN	12.6439	11.9732	NaN	NaN	NaN	NaN	NaN	NaN	NaN	12.2624	NaN	12.0455	NaN	NaN	11.4524
627	EDEDKDEDEE	10	626.721	1251.43	2	8.36633	NaN	8.62858	9.91471	8.21699	9.01539	9.59323	NaN	8.80031	8.82668	8.81928	8.28641	NaN	NaN	NaN	NaN	NaN	NaN	8.58291	NaN	8.46797	NaN	9.98568	10.2728
628	VDHATCS	7	395.164	788.312	2	8.75077	NaN	8.57245	NaN	NaN	NaN	NaN	NaN	NaN	9.32033	10.0681	10.865	7.32469	8.31599	NaN	NaN	NaN	NaN	9.04109	NaN	8.9276	8.29904	NaN	NaN
629	SGSSWAHTCGGTLL	14	717.326	1432.64	2	NaN	NaN	14.1102	NaN	NaN	NaN	NaN	NaN	NaN	NaN	NaN	NaN	NaN	NaN	NaN	NaN	13.6226	15.0604	NaN	NaN	NaN	NaN	NaN	13.476
630	APVLSNSDHN	10	527.739	1053.47	2	NaN	NaN	NaN	11.9258	10.3772	11.3103	11.0863	NaN	NaN	11.4801	10.5278	NaN	12.2411	10.9478	10.8935	NaN	10.0593	10.4611	11.5198	12.6246	11.4993	11.5571	11.3842	11.9879
631	VCLPSASDDFPAGTLC	16	855.377	1708.74	2	NaN	NaN	NaN	NaN	NaN	NaN	NaN	NaN	NaN	NaN	13.2573	14.156	NaN	13.3599	NaN	NaN	NaN	NaN	12.457	NaN	12.571	NaN	NaN	NaN
632	DGQYAVHGV	9	473.224	944.435	2	8.32524	NaN	NaN	NaN	7.25041	NaN	NaN	9.21388	NaN	9.56688	8.75803	7.75298	NaN	NaN	NaN	NaN	NaN	NaN	NaN	NaN	NaN	NaN	8.13558	NaN
633	LACGVLGLT	9	452.252	902.49	2	10.9301	NaN	NaN	NaN	NaN	NaN	11.1145	10.5252	NaN	10.9462	11.549	11.7936	10.6869	11.304	NaN	NaN	9.292	NaN	12.1604	NaN	NaN	11.0854	11.2214	11.3649
634	VYVSYSY	7	440.706	879.401	2	NaN	NaN	NaN	10.8459	NaN	NaN	10.2945	9.84727	7.83429	NaN	NaN	NaN	NaN	NaN	NaN	NaN	NaN	NaN	NaN	NaN	NaN	NaN	NaN	NaN
635	LSVGGNVTPA	10	457.751	913.487	2	13.0598	10.5137	12.8287	11.4552	NaN	NaN	11.6555	10.6118	10.0832	NaN	NaN	NaN	12.5241	13.5423	NaN	NaN	9.89123	NaN	12.9406	12.7419	13.4047	11.0162	10.5056	NaN
636	LMEHTLNHP	9	364.514	1090.52	3	10.5822	NaN	8.35373	NaN	7.1277	NaN	NaN	8.94425	NaN	10.2836	10.8675	10.6817	NaN	9.89646	NaN	9.36599	10.3431	11.0096	8.45432	NaN	NaN	9.94667	9.67931	9.87487
637	ASSNEALPEGL	11	544.267	1086.52	2	13.1619	NaN	13.684	11.7241	NaN	NaN	11.4378	11.529	NaN	12.5973	12.5586	13.3016	NaN	NaN	NaN	NaN	10.1182	NaN	13.1677	11.9238	NaN	12.3206	NaN	12.0524
638	VTVGSLTN	8	395.718	789.423	2	NaN	NaN	NaN	8.68797	NaN	NaN	NaN	NaN	NaN	NaN	NaN	6.91967	7.9486	NaN	NaN	NaN	9.50186	10.378	NaN	NaN	NaN	5.86012	NaN	NaN
639	GPAGPSGPAGK	11	448.237	894.456	2	NaN	NaN	NaN	NaN	7.49037	NaN	NaN	8.8823	NaN	9.38778	NaN	NaN	NaN	NaN	NaN	7.83886	8.24702	9.53454	NaN	NaN	NaN	NaN	7.64088	NaN
640	NCGYPGLSPEDCAA	14	755.8	1509.59	2	NaN	NaN	NaN	14.3168	12.2483	NaN	13.9673	NaN	12.7287	NaN	NaN	NaN	NaN	NaN	10.9859	NaN	NaN	NaN	NaN	NaN	11.9686	14.1173	13.392	NaN
641	FNTWLNQVL	9	567.8	1133.59	2	7.64583	NaN	NaN	8.8697	NaN	NaN	7.66793	7.65176	NaN	NaN	NaN	NaN	9.48217	7.11459	NaN	NaN	NaN	NaN	8.1536	NaN	8.63761	NaN	NaN	NaN
642	VVVGEHNLN	9	490.762	979.509	2	11.5221	8.15975	12.565	9.60841	8.73088	8.01215	NaN	9.99742	8.84263	11.4947	11.298	11.5409	9.48119	8.82262	8.62326	10.7033	11.348	12.3875	11.2486	10.6713	11.1118	10.3694	9.88297	10.8193
643	CFTCNVNHPATTT	13	761.823	1521.63	2	NaN	NaN	NaN	NaN	NaN	NaN	NaN	NaN	NaN	10.0628	9.23735	9.38225	8.43954	NaN	NaN	NaN	NaN	NaN	NaN	NaN	NaN	NaN	NaN	NaN
644	SGSFCVGVDPN	11	569.745	1137.48	2	NaN	NaN	NaN	10.2897	NaN	NaN	NaN	NaN	NaN	10.5459	10.6043	11.3606	NaN	NaN	NaN	NaN	NaN	NaN	NaN	NaN	NaN	NaN	NaN	NaN
645	CLPSASDNFPAGTL	14	725.828	1449.64	2	NaN	11.9406	NaN	NaN	NaN	NaN	NaN	NaN	NaN	15.6214	NaN	15.4327	15.2847	NaN	NaN	NaN	NaN	NaN	14.9417	NaN	15.4845	NaN	NaN	14.2062
646	GFYCDR	6	409.169	816.322	2	6.69804	NaN	NaN	6.74782	NaN	NaN	NaN	6.28434	NaN	NaN	NaN	NaN	NaN	NaN	NaN	NaN	NaN	NaN	NaN	NaN	NaN	6.67978	7.04233	NaN
647	LMEHTL	6	372.191	742.368	2	9.44106	NaN	9.10341	7.1022	NaN	NaN	NaN	7.48495	NaN	7.81821	NaN	NaN	NaN	NaN	NaN	NaN	8.65498	9.38497	NaN	7.2483	NaN	8.11455	8.0266	NaN
648	EWLSHA	6	371.679	741.344	2	11.8721	NaN	12.226	10.7935	NaN	NaN	NaN	11.2908	NaN	12.7046	12.8419	12.7082	9.42797	NaN	NaN	NaN	NaN	NaN	NaN	11.2439	11.6252	10.9012	NaN	10.8441
649	TCTGPTH	7	387.167	772.317	2	NaN	NaN	NaN	6.45691	NaN	NaN	6.71598	NaN	NaN	NaN	NaN	NaN	6.52907	NaN	6.51183	NaN	NaN	NaN	NaN	NaN	NaN	NaN	NaN	NaN
650	LFMNCGFHA	9	549.23	1096.45	2	NaN	NaN	10.9502	10.7196	NaN	NaN	10.812	NaN	9.40966	11.5358	11.2713	10.6618	9.52739	9.41281	9.81372	9.68862	10.5792	11.3356	11.2699	11.0981	11.2714	10.1505	10.6273	NaN
651	SLGSHAAGEAG	11	478.726	955.436	2	10.2853	NaN	NaN	NaN	NaN	NaN	NaN	NaN	NaN	10.9043	10.2734	9.91506	9.48705	NaN	NaN	NaN	NaN	NaN	NaN	NaN	NaN	NaN	NaN	10.0128
652	LSLPQDYPCYVT	12	728.344	1454.68	2	NaN	NaN	10.9551	NaN	NaN	NaN	10.7565	NaN	9.87642	NaN	11.6343	12.2866	NaN	NaN	NaN	NaN	NaN	10.2026	11.6942	NaN	NaN	NaN	NaN	10.9453
653	LFMDCGFHA	9	557.227	1112.44	2	NaN	NaN	NaN	9.65131	NaN	NaN	NaN	10.1428	NaN	10.8333	NaN	NaN	NaN	NaN	NaN	NaN	NaN	10.2399	10.1674	NaN	10.1143	9.42437	9.72372	9.92123
654	SQETVREEV	9	538.766	1075.51	2	9.94637	NaN	9.97982	NaN	NaN	NaN	NaN	NaN	NaN	9.00026	9.05157	9.11736	NaN	NaN	NaN	NaN	NaN	NaN	10.3177	NaN	9.03941	NaN	NaN	NaN
655	SLLGNLGLT	9	444.263	886.512	2	NaN	NaN	NaN	NaN	NaN	NaN	NaN	NaN	NaN	NaN	NaN	NaN	NaN	NaN	NaN	6.5048	NaN	7.86255	NaN	NaN	NaN	NaN	NaN	NaN
656	LGLSTLK	7	366.237	730.459	2	NaN	NaN	NaN	NaN	NaN	NaN	NaN	NaN	NaN	7.40753	NaN	NaN	NaN	NaN	NaN	NaN	NaN	NaN	NaN	NaN	NaN	NaN	7.61842	7.94883
657	WNTDDVAAGYDLA	13	705.812	1409.61	2	13.6419	NaN	NaN	NaN	NaN	NaN	NaN	NaN	NaN	13.5055	11.7722	NaN	NaN	NaN	NaN	NaN	NaN	NaN	NaN	NaN	NaN	NaN	NaN	13.4016
658	LYPTVDYALC	10	607.792	1213.57	2	NaN	NaN	NaN	10.5571	NaN	NaN	NaN	NaN	NaN	NaN	11.552	NaN	NaN	NaN	NaN	NaN	NaN	NaN	10.0107	9.18425	NaN	NaN	NaN	NaN
659	VGNSCTGLQ	9	468.217	934.418	2	9.06884	NaN	NaN	9.00319	NaN	NaN	8.55822	NaN	7.66643	NaN	NaN	9.53028	NaN	NaN	NaN	NaN	NaN	NaN	8.17939	NaN	NaN	9.32145	8.06633	NaN
660	QTLLANNSPC	10	559.268	1116.52	2	10.9519	NaN	NaN	NaN	NaN	NaN	NaN	NaN	NaN	11.2022	10.7098	NaN	10.0457	NaN	9.71062	NaN	10.2132	11.3524	NaN	11.3318	NaN	NaN	NaN	10.9751
661	LSLLQEASPELV	12	649.864	1297.71	2	8.36354	NaN	NaN	8.97342	NaN	NaN	9.33993	8.60819	NaN	NaN	NaN	NaN	NaN	NaN	7.97748	NaN	NaN	NaN	NaN	NaN	NaN	NaN	8.61605	NaN
662	QGLQPVVDHATCSQ	14	770.364	1538.71	2	NaN	NaN	NaN	NaN	NaN	NaN	NaN	NaN	NaN	NaN	NaN	NaN	NaN	NaN	NaN	NaN	10.615	10.7191	NaN	NaN	NaN	NaN	NaN	NaN
663	ANWWDDGSN	9	532.708	1063.4	2	8.67926	NaN	NaN	NaN	7.94519	NaN	NaN	NaN	NaN	10.0172	9.15955	NaN	NaN	NaN	NaN	NaN	NaN	NaN	NaN	NaN	NaN	9.07914	9.32008	10.5242
664	LVVHPYWN	8	514.271	1026.53	2	10.2273	NaN	NaN	NaN	NaN	NaN	NaN	9.68677	NaN	10.6629	NaN	NaN	9.01106	9.18924	NaN	10.3056	10.2243	11.8189	NaN	8.95227	NaN	NaN	NaN	10.0112
665	LVTNPNGFAFTHSEN	15	824.882	1647.75	2	NaN	NaN	NaN	NaN	NaN	NaN	NaN	NaN	NaN	NaN	NaN	NaN	NaN	NaN	NaN	10.1405	NaN	11.7464	NaN	NaN	NaN	NaN	NaN	NaN
666	NLQSGQGC	8	432.188	862.36	2	NaN	NaN	NaN	6.96832	NaN	NaN	7.33997	NaN	NaN	7.1307	NaN	6.67689	NaN	NaN	NaN	NaN	NaN	6.57355	8.12607	NaN	7.20653	7.07704	6.70154	NaN
667	NFGLCHDV	8	481.215	960.412	2	NaN	NaN	NaN	NaN	NaN	NaN	NaN	NaN	NaN	NaN	10.6311	11.4015	NaN	NaN	NaN	NaN	NaN	NaN	9.38828	NaN	NaN	9.1101	NaN	NaN
668	LDVLYLPR	8	494.794	987.575	2	NaN	NaN	NaN	7.23011	7.40917	7.70707	NaN	8.84324	NaN	NaN	NaN	NaN	NaN	NaN	NaN	NaN	NaN	7.34277	NaN	NaN	NaN	NaN	8.42422	8.74734
669	NSWPSQL	7	416.203	830.392	2	10.4757	NaN	9.71014	NaN	NaN	8.39621	NaN	10.2013	NaN	10.4601	NaN	8.69836	9.27928	9.24986	NaN	NaN	10.6333	11.8761	9.97662	10.6326	NaN	9.07504	9.85109	9.98645
670	SSCQGDSGGPLVC	13	662.269	1322.52	2	11.7908	NaN	12.0028	11.5611	NaN	NaN	11.4705	NaN	10.6761	12.1489	12.2345	12.1872	NaN	12.6857	11.0878	NaN	NaN	NaN	12.1198	NaN	12.2162	11.9744	10.8996	11.0422
671	TALGTTFL	8	412.231	822.449	2	10.4374	8.27582	10.3801	9.10586	NaN	NaN	NaN	NaN	NaN	10.7694	10.1216	9.92935	NaN	NaN	NaN	8.98162	9.25772	10.4408	NaN	9.62401	10.1506	12.5841	8.42648	NaN
672	TACAHWSGNCCF	12	735.772	1469.53	2	NaN	NaN	NaN	NaN	9.4794	NaN	10.6732	10.2101	NaN	NaN	NaN	NaN	9.99649	NaN	NaN	NaN	9.54512	NaN	NaN	NaN	NaN	NaN	NaN	NaN
673	VPMMAVK	7	388.213	774.413	2	NaN	NaN	NaN	NaN	NaN	NaN	NaN	8.41572	NaN	9.38929	NaN	NaN	NaN	NaN	NaN	NaN	8.41608	9.26741	NaN	NaN	NaN	NaN	NaN	NaN
674	VAVSFGSGLGCNTYK	15	780.377	1558.74	2	11.0699	7.28943	NaN	9.97544	11.8215	12.3901	NaN	13.2479	NaN	11.4941	NaN	NaN	12.8427	NaN	10.5151	10.4621	10.047	11.5243	NaN	10.1815	NaN	9.30431	NaN	12.944
675	QQGLQPVVDHATC	13	726.849	1451.68	2	11.4437	8.32365	12.6455	NaN	NaN	NaN	NaN	NaN	NaN	NaN	9.64602	10.0036	NaN	NaN	NaN	NaN	NaN	NaN	10.5432	NaN	NaN	NaN	NaN	NaN
676	SQMLLYPY	8	507.752	1013.49	2	11.7131	8.12005	10.4955	NaN	NaN	NaN	NaN	8.64064	NaN	11.214	NaN	NaN	NaN	NaN	NaN	8.3652	9.01791	NaN	NaN	NaN	NaN	NaN	NaN	NaN
677	AREDSQCSA	9	512.704	1023.39	2	NaN	NaN	8.08733	7.77585	NaN	NaN	8.10142	7.4587	NaN	NaN	8.18673	NaN	NaN	NaN	NaN	NaN	NaN	NaN	8.97124	NaN	NaN	7.72612	NaN	NaN
678	LVVHFE	6	372.207	742.401	2	9.24148	NaN	9.04555	NaN	NaN	NaN	NaN	NaN	NaN	8.62917	NaN	NaN	6.61138	NaN	NaN	NaN	NaN	NaN	NaN	8.38811	NaN	NaN	NaN	NaN
679	HEKDPDLG	8	455.718	909.419	2	14.1837	NaN	14.5637	NaN	NaN	NaN	NaN	NaN	NaN	NaN	NaN	NaN	NaN	NaN	NaN	NaN	NaN	NaN	NaN	NaN	NaN	15.3396	NaN	NaN
680	QNCVGFLEGGK	11	604.794	1207.57	2	NaN	NaN	NaN	11.8739	NaN	11.7119	10.3679	NaN	NaN	NaN	NaN	NaN	13.2846	12.0741	NaN	NaN	NaN	NaN	NaN	NaN	NaN	NaN	NaN	10.4845
681	FNEVSQ	6	362.169	722.324	2	8.7661	NaN	NaN	9.79663	NaN	NaN	9.88266	NaN	NaN	9.05173	8.69239	NaN	NaN	NaN	8.74007	NaN	NaN	NaN	9.18588	8.51209	9.26271	9.38142	NaN	NaN
682	TMVVHEKPDDLG	12	452.886	1355.64	3	NaN	NaN	10.1024	NaN	NaN	NaN	10.5542	NaN	NaN	NaN	NaN	NaN	NaN	10.7718	10.9183	8.79582	NaN	NaN	NaN	NaN	NaN	10.1119	NaN	NaN
683	TLMEHT	6	366.174	730.332	2	11.2423	8.88077	12.4285	8.15515	7.16029	NaN	9.4674	9.29426	9.34513	10.8083	11.9391	11.4494	NaN	7.06219	NaN	10.361	11.4431	11.6311	12.7217	10.8006	10.986	10.815	10.9714	10.5433
684	ASGGTLNWTYNQGLK	15	805.893	1609.77	2	NaN	NaN	NaN	9.7396	NaN	NaN	9.56818	10.6008	NaN	NaN	NaN	NaN	NaN	NaN	NaN	12.247	13.1997	13.8626	NaN	NaN	NaN	10.4564	11.1944	11.2072
685	VVVGEHN	7	377.199	752.382	2	6.76398	NaN	NaN	NaN	NaN	NaN	NaN	NaN	NaN	NaN	7.68967	8.23431	8.2075	NaN	NaN	8.86425	9.58829	10.5917	NaN	NaN	NaN	NaN	NaN	NaN
