# Supplementary material
Source: Royal Society of Chemistry journal article supplement (doi:10.1039/d6fo00231e)
Supplement: d6fo00231e2.pdf [file d6fo00231e2.pdf]

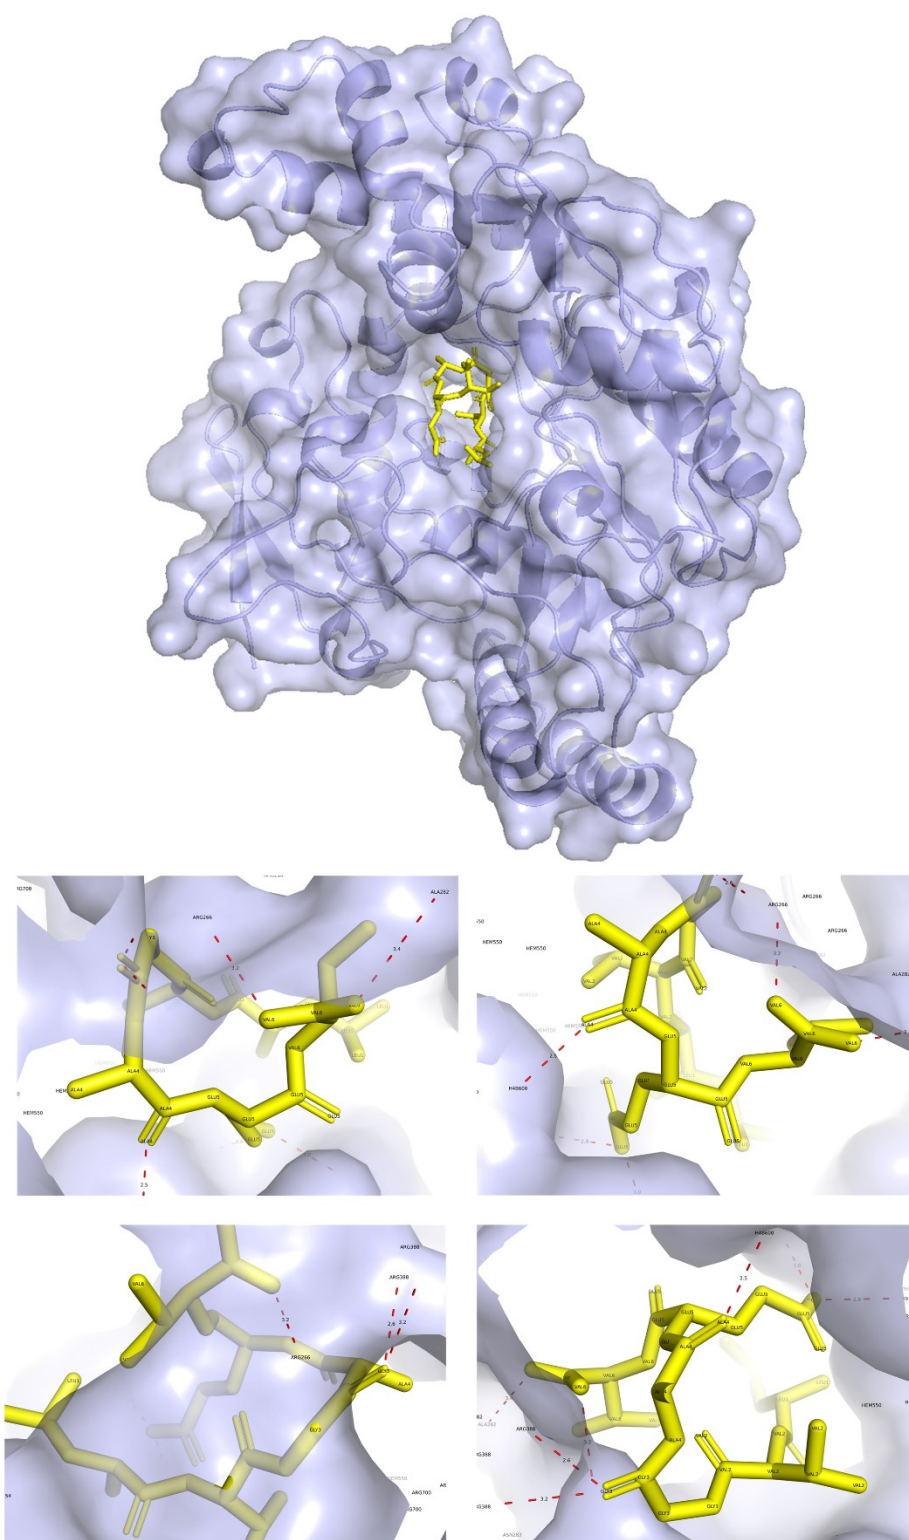

**Supplementary Figure S1.** Molecular docking analysis of the interaction between 1NSI and the LVGAEV peptide. Interactions and hydrogen bonds between amino acids in LVGAEV and 1NSI are illustrated.
